# Supplementary material for: Retracted: Silymarin Accelerates Liver Regeneration after Partial Hepatectomy
Source: Hindawi journal article supplement (doi:10.1155/2017/2575273), 2017-01-01

**Cyclin B (6hrs)**

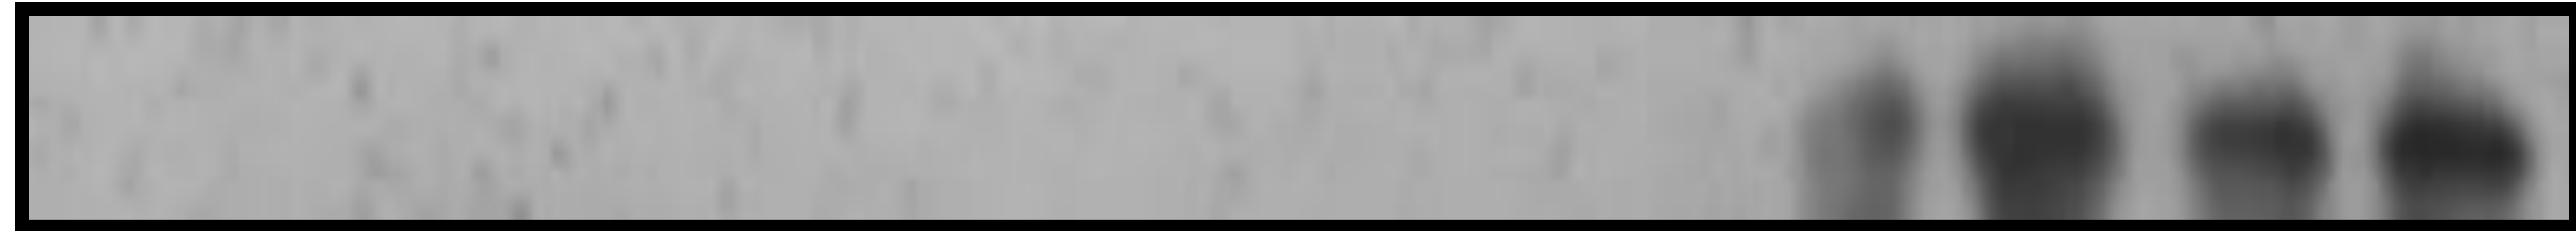

**Cyclin B (24hrs)**

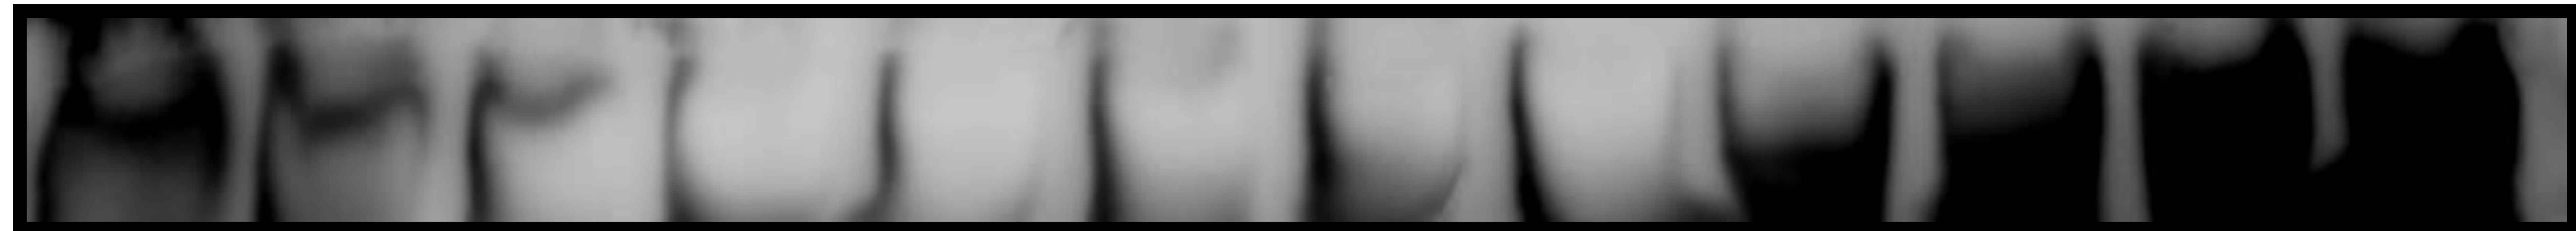

**Cyclin B (72hrs)**

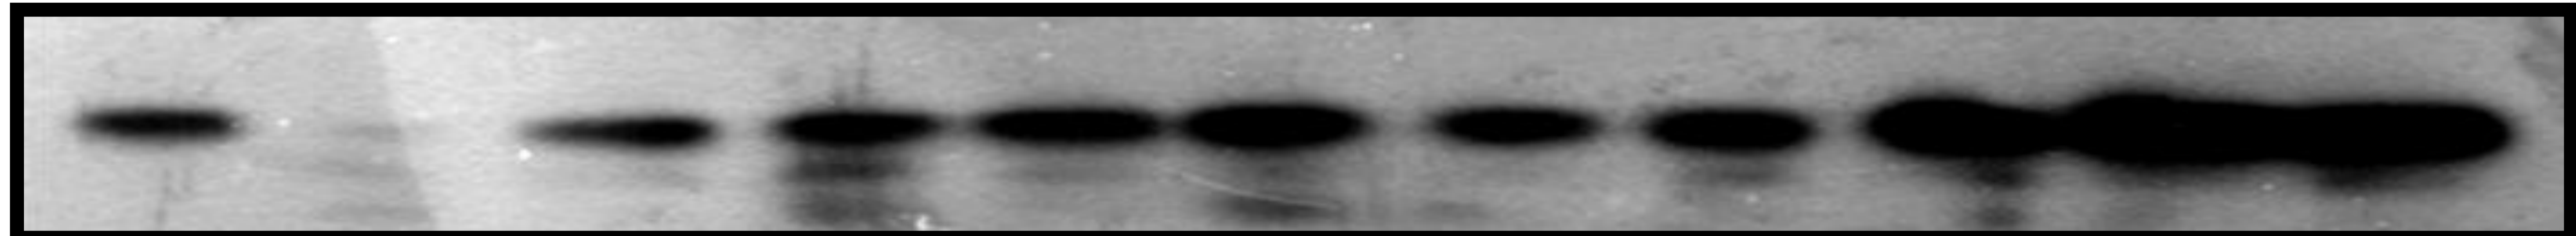

**$\alpha$ -Tubulin**

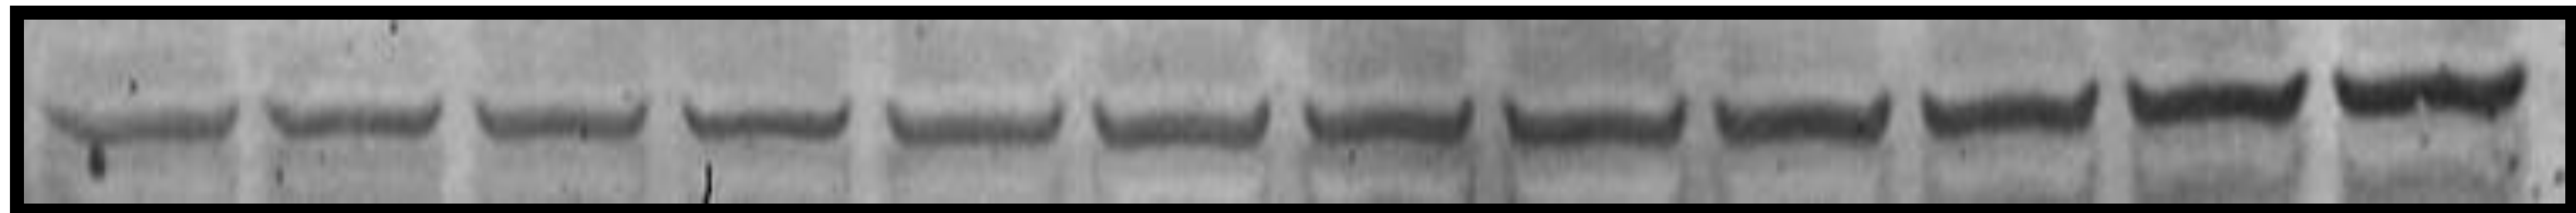

**sham**

**PHx**

**PHx+Sm**

# Cyclin B/Tubulin

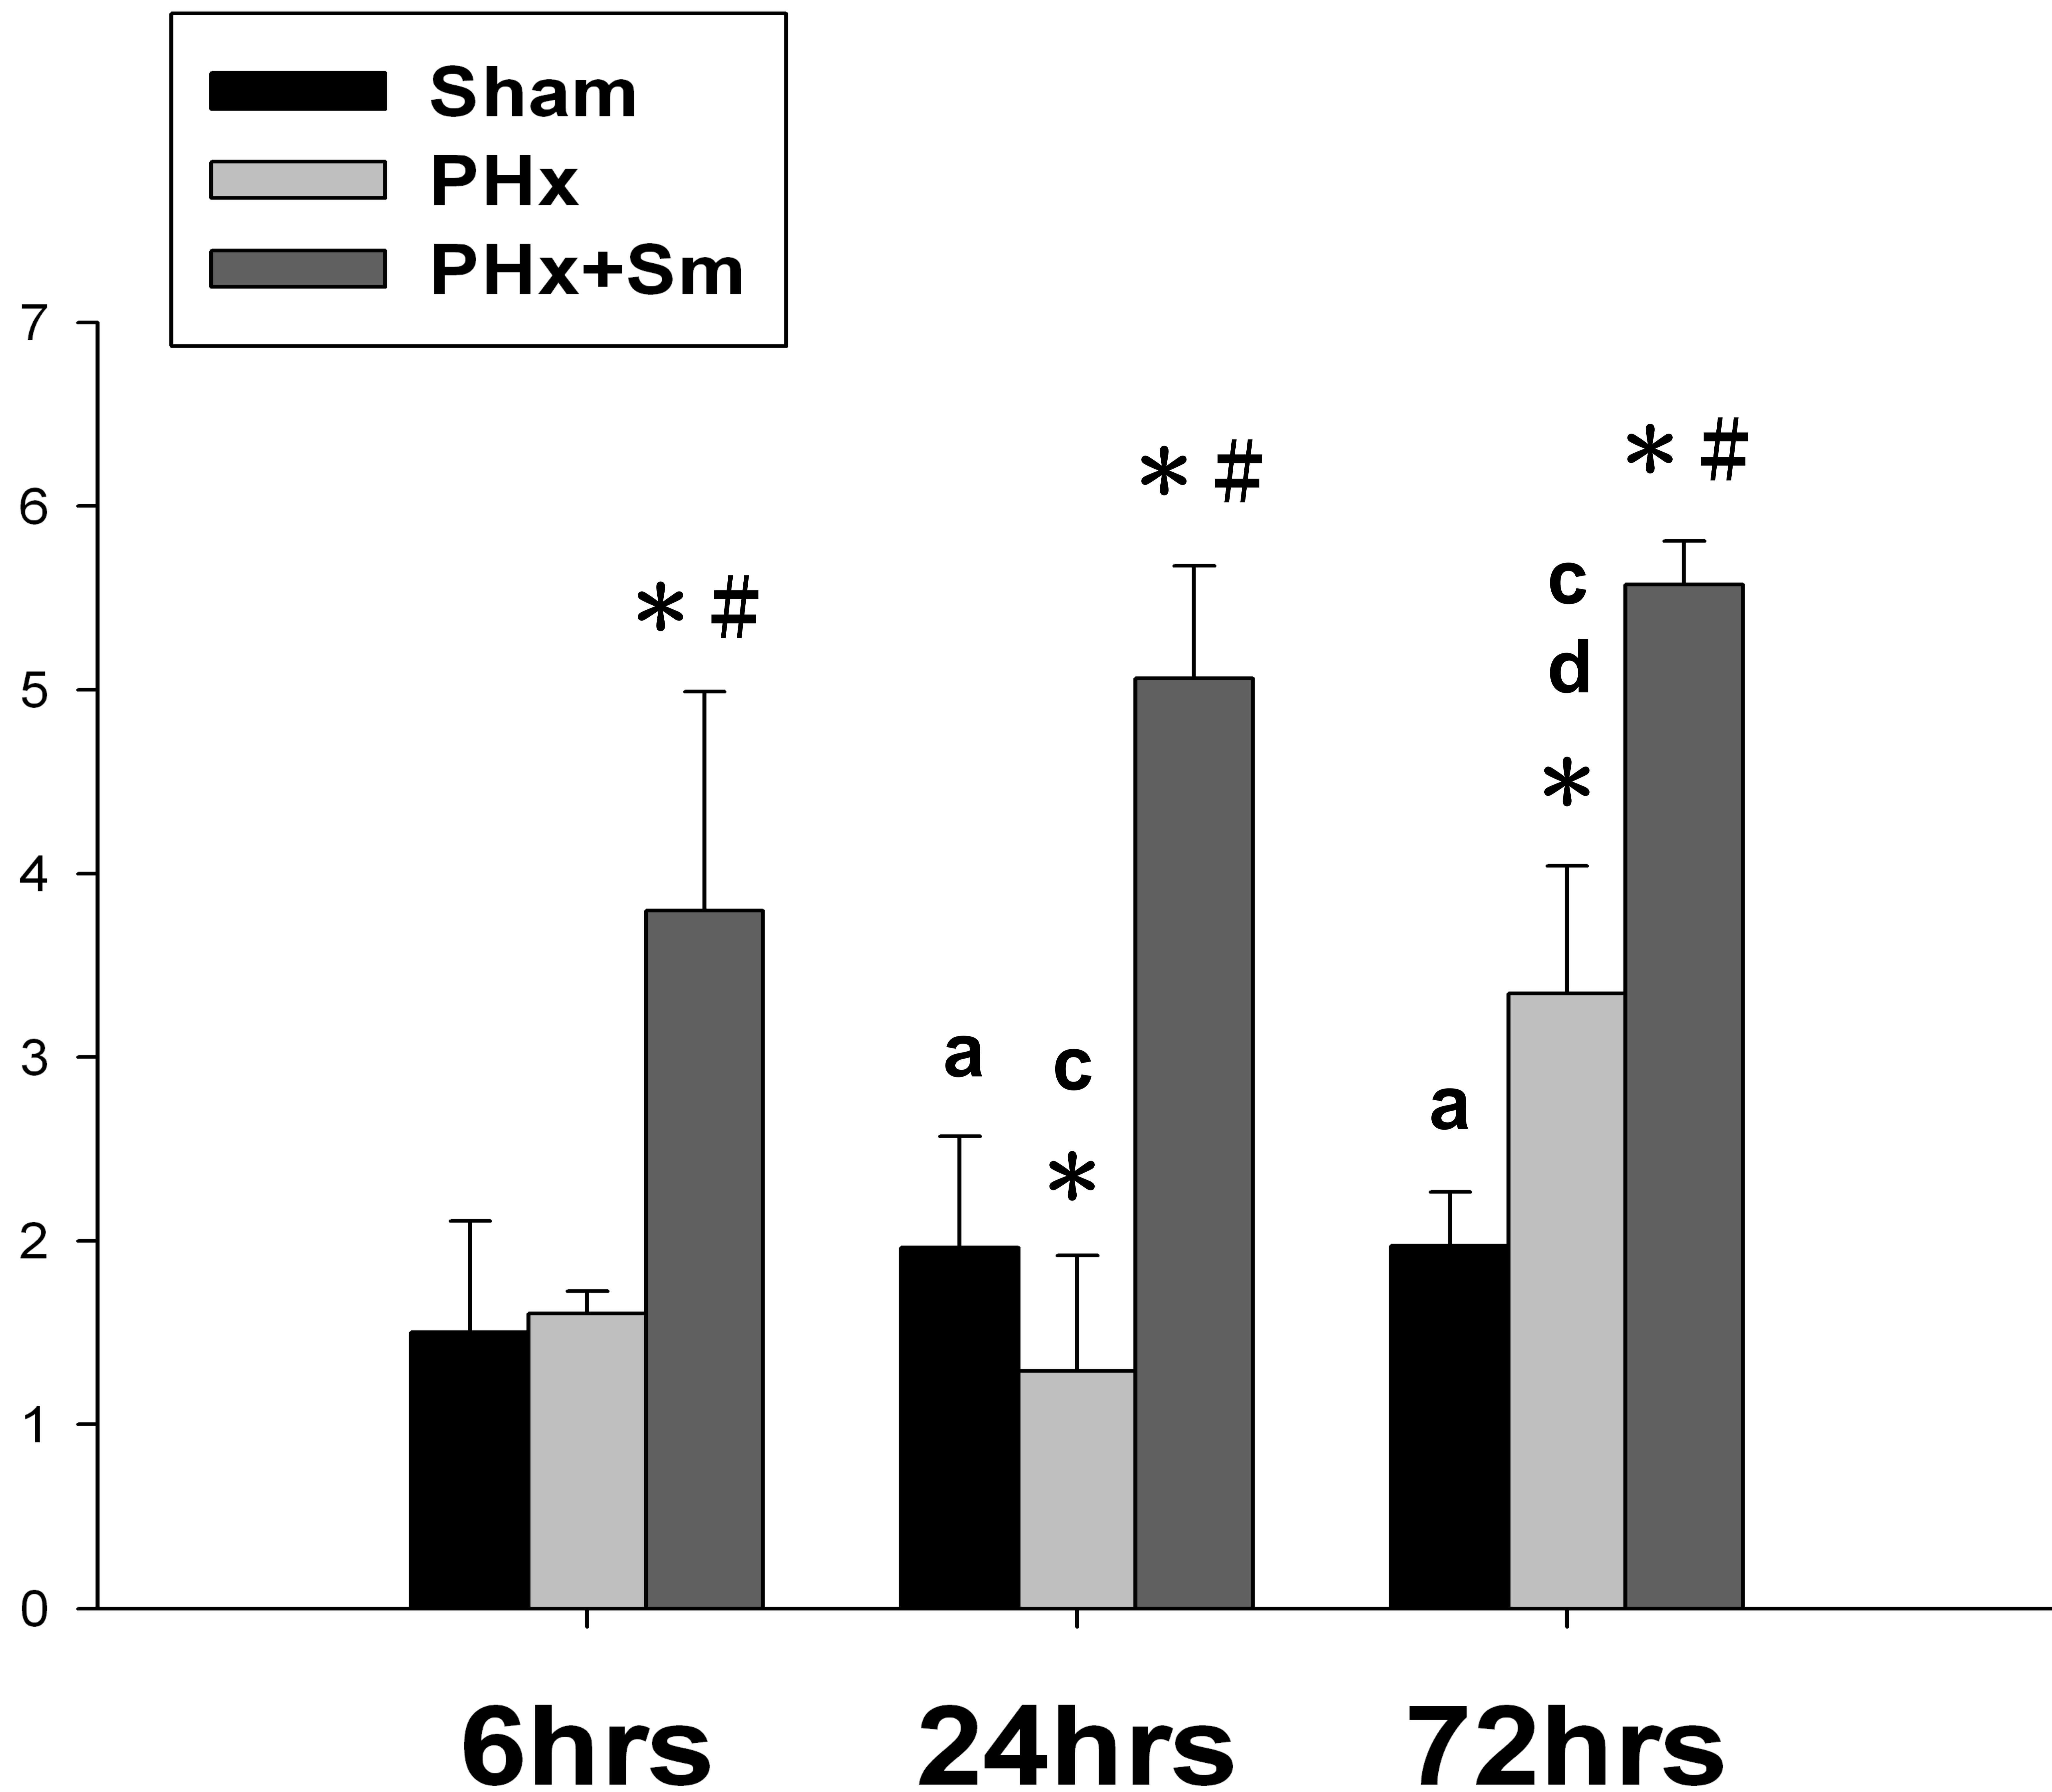

**Cyclin B (6hrs)**

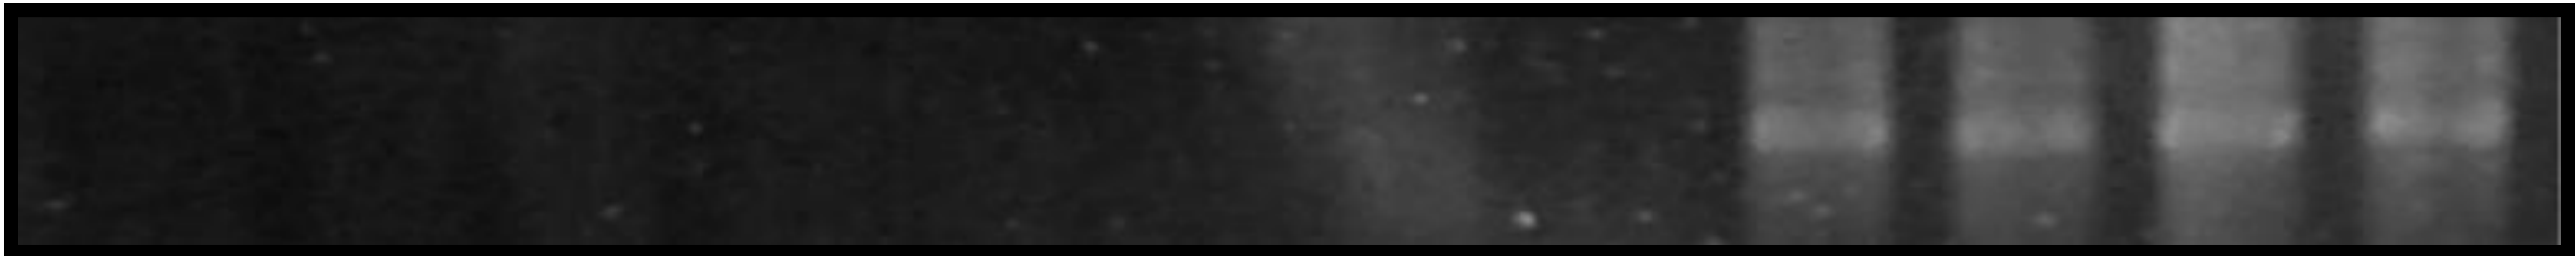

**Cyclin B (24hrs)**

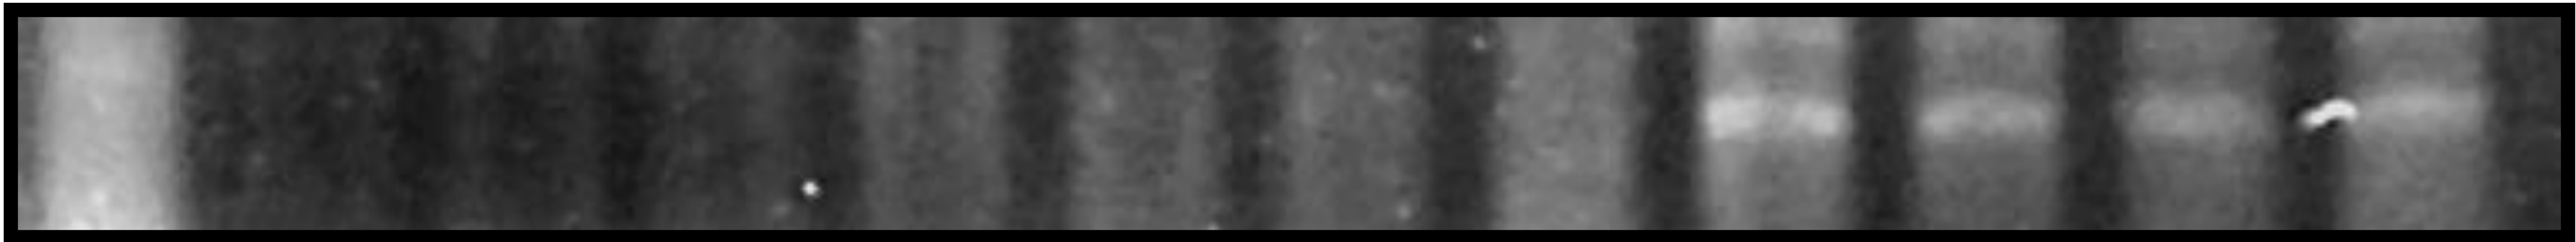

**Cyclin B (72hrs)**

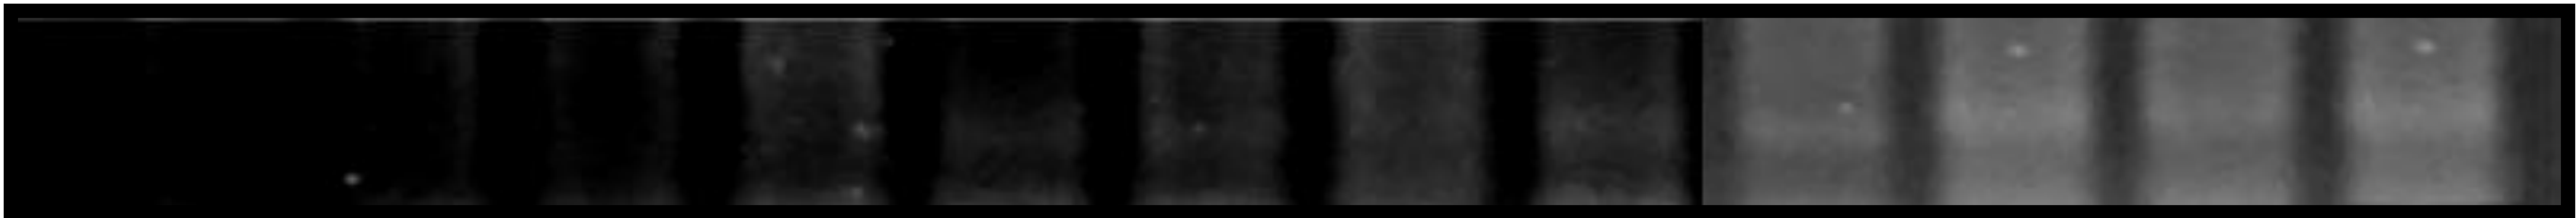

**GAPDH**

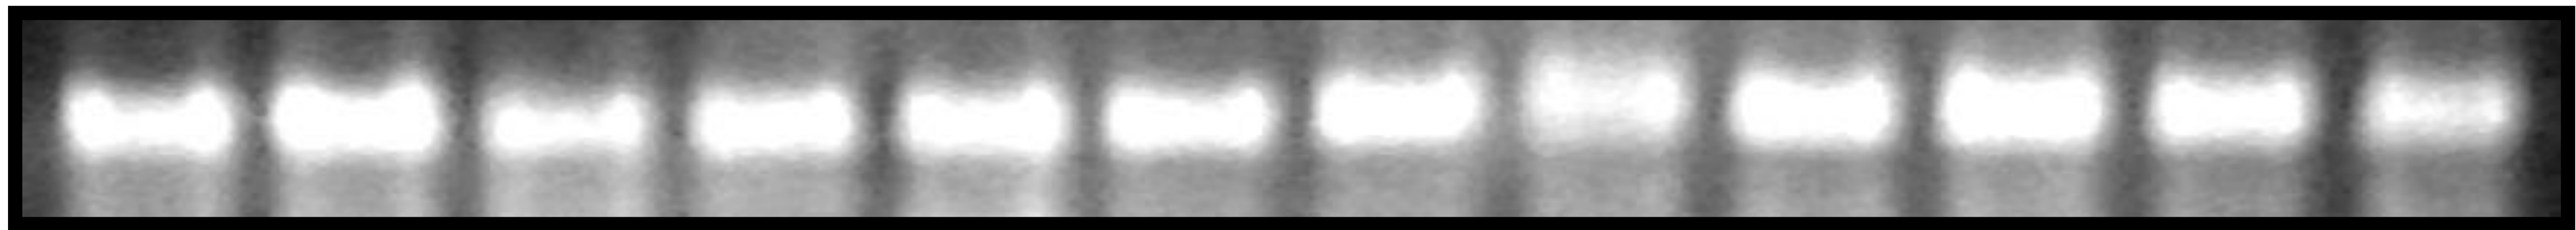

**sham**

**PHx**

**PHx+Sm**

**Cyclin B/GAPDH**

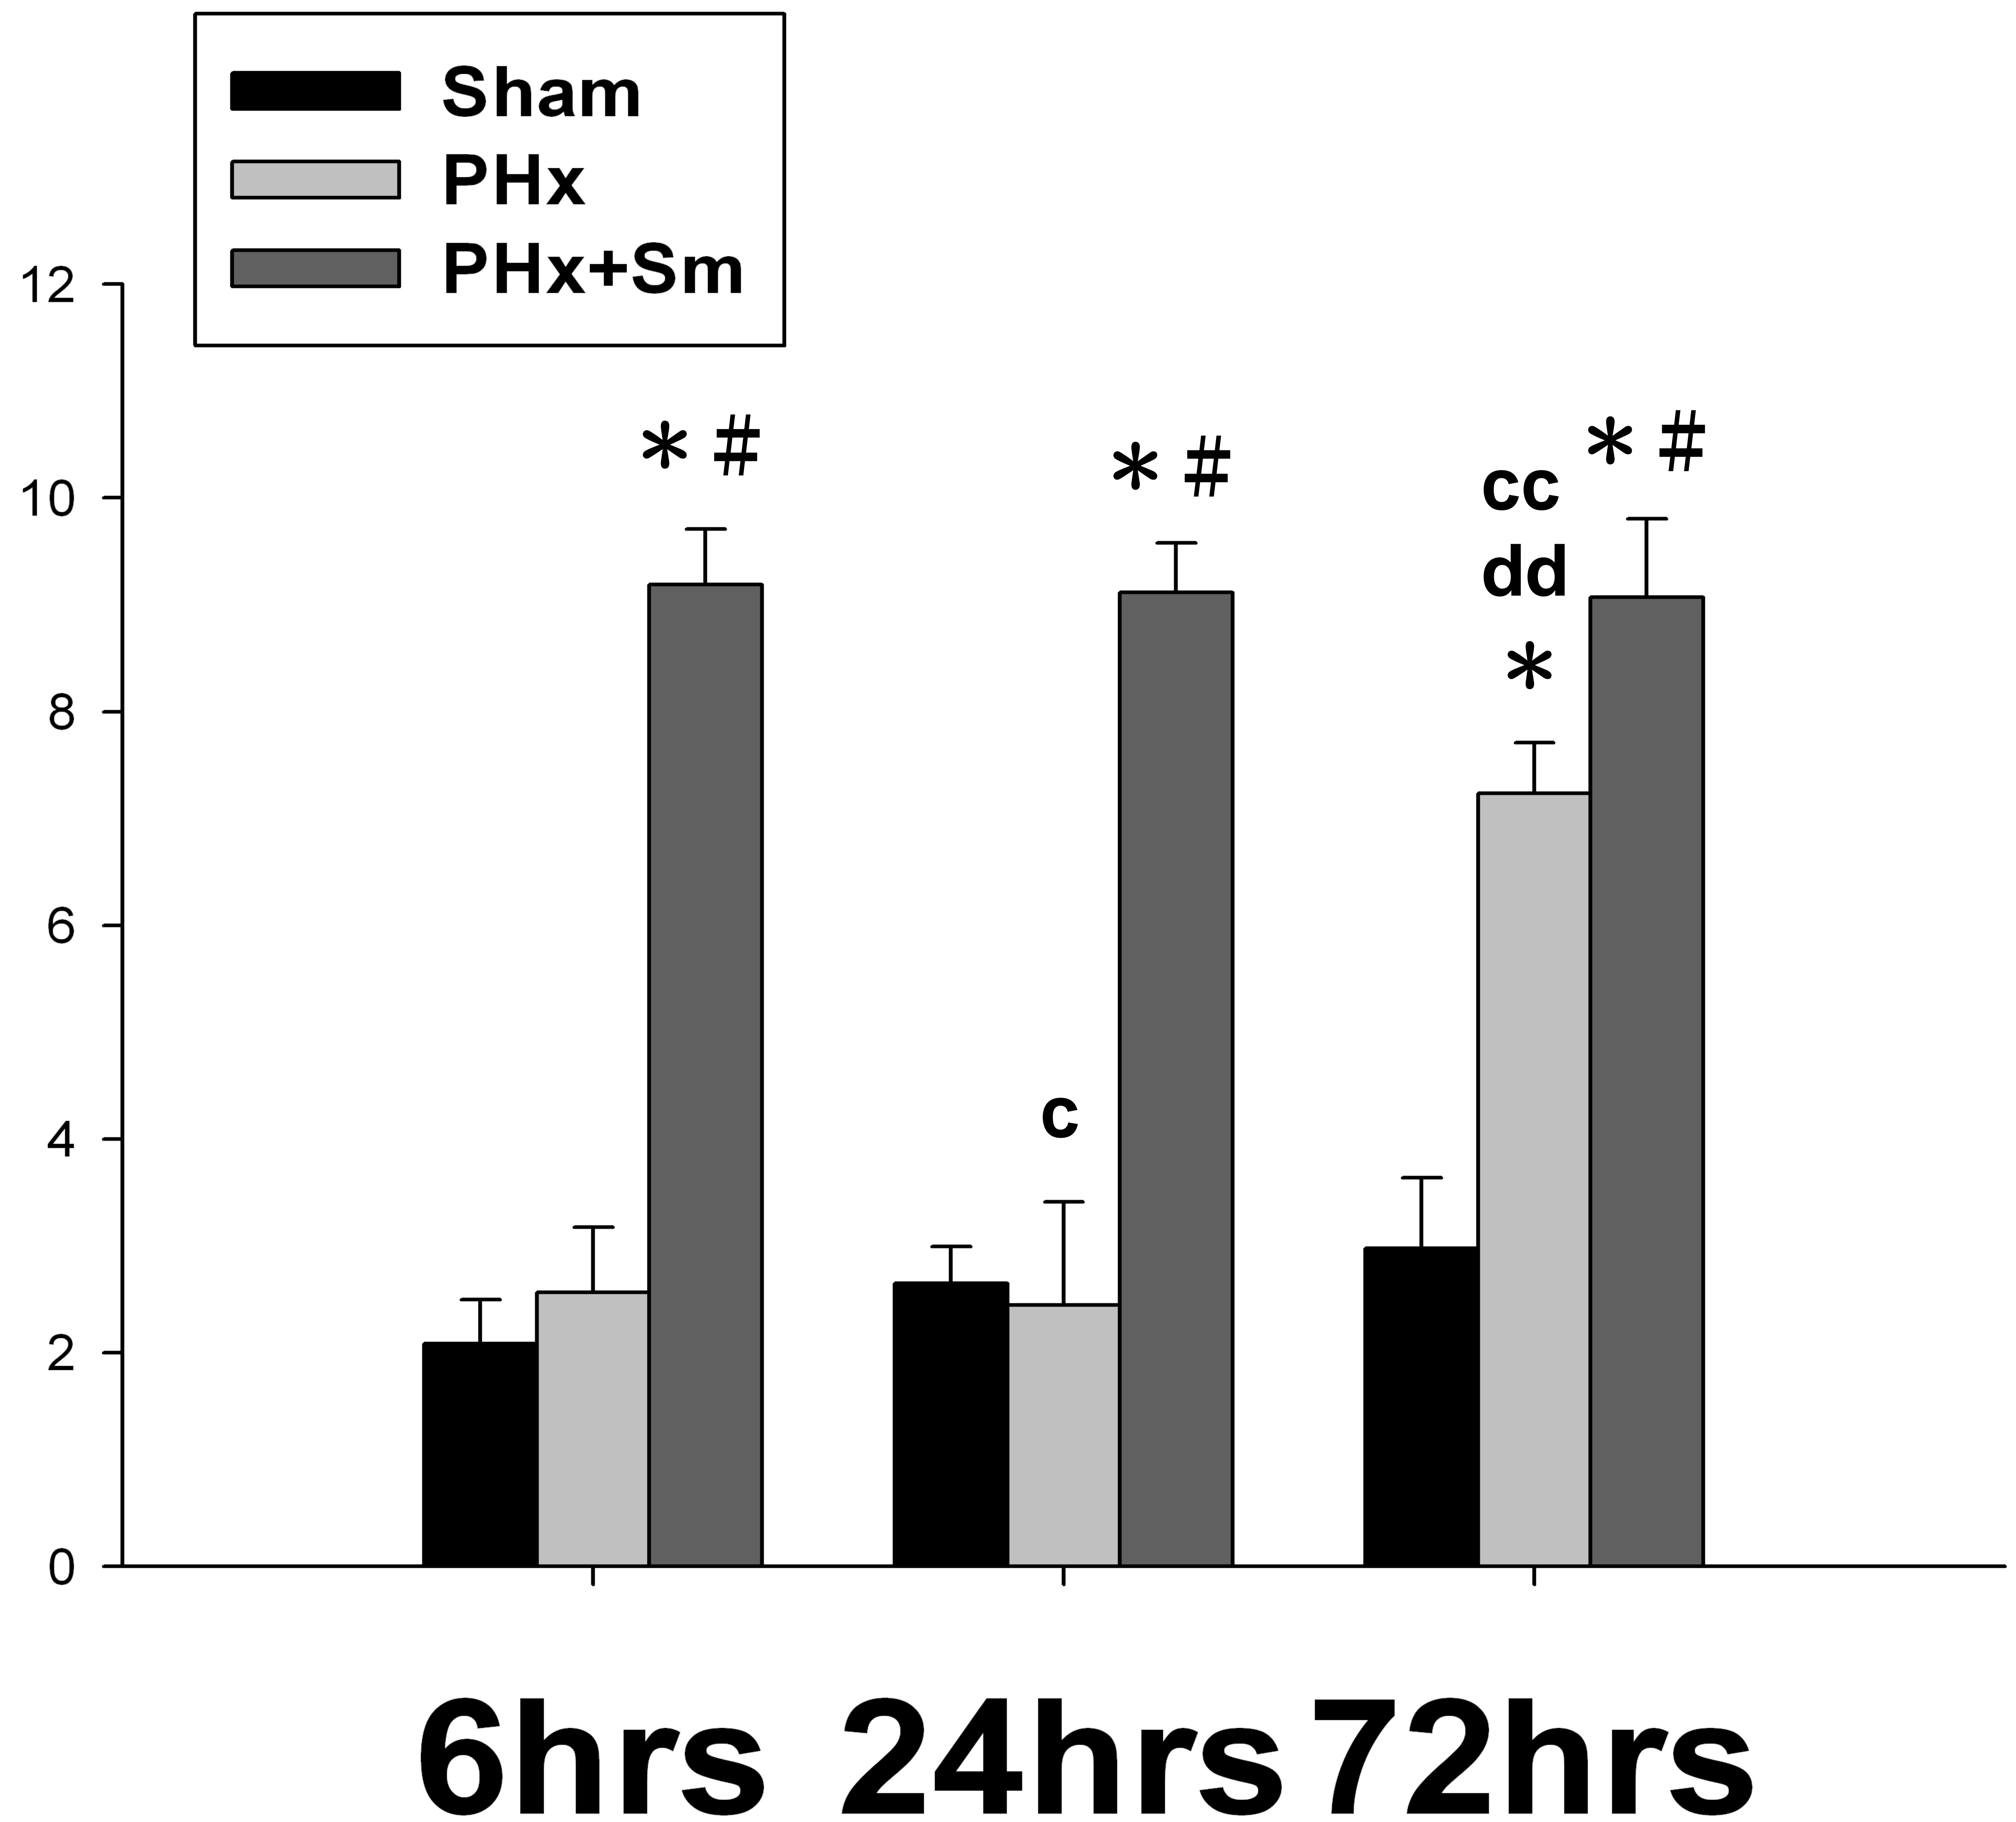

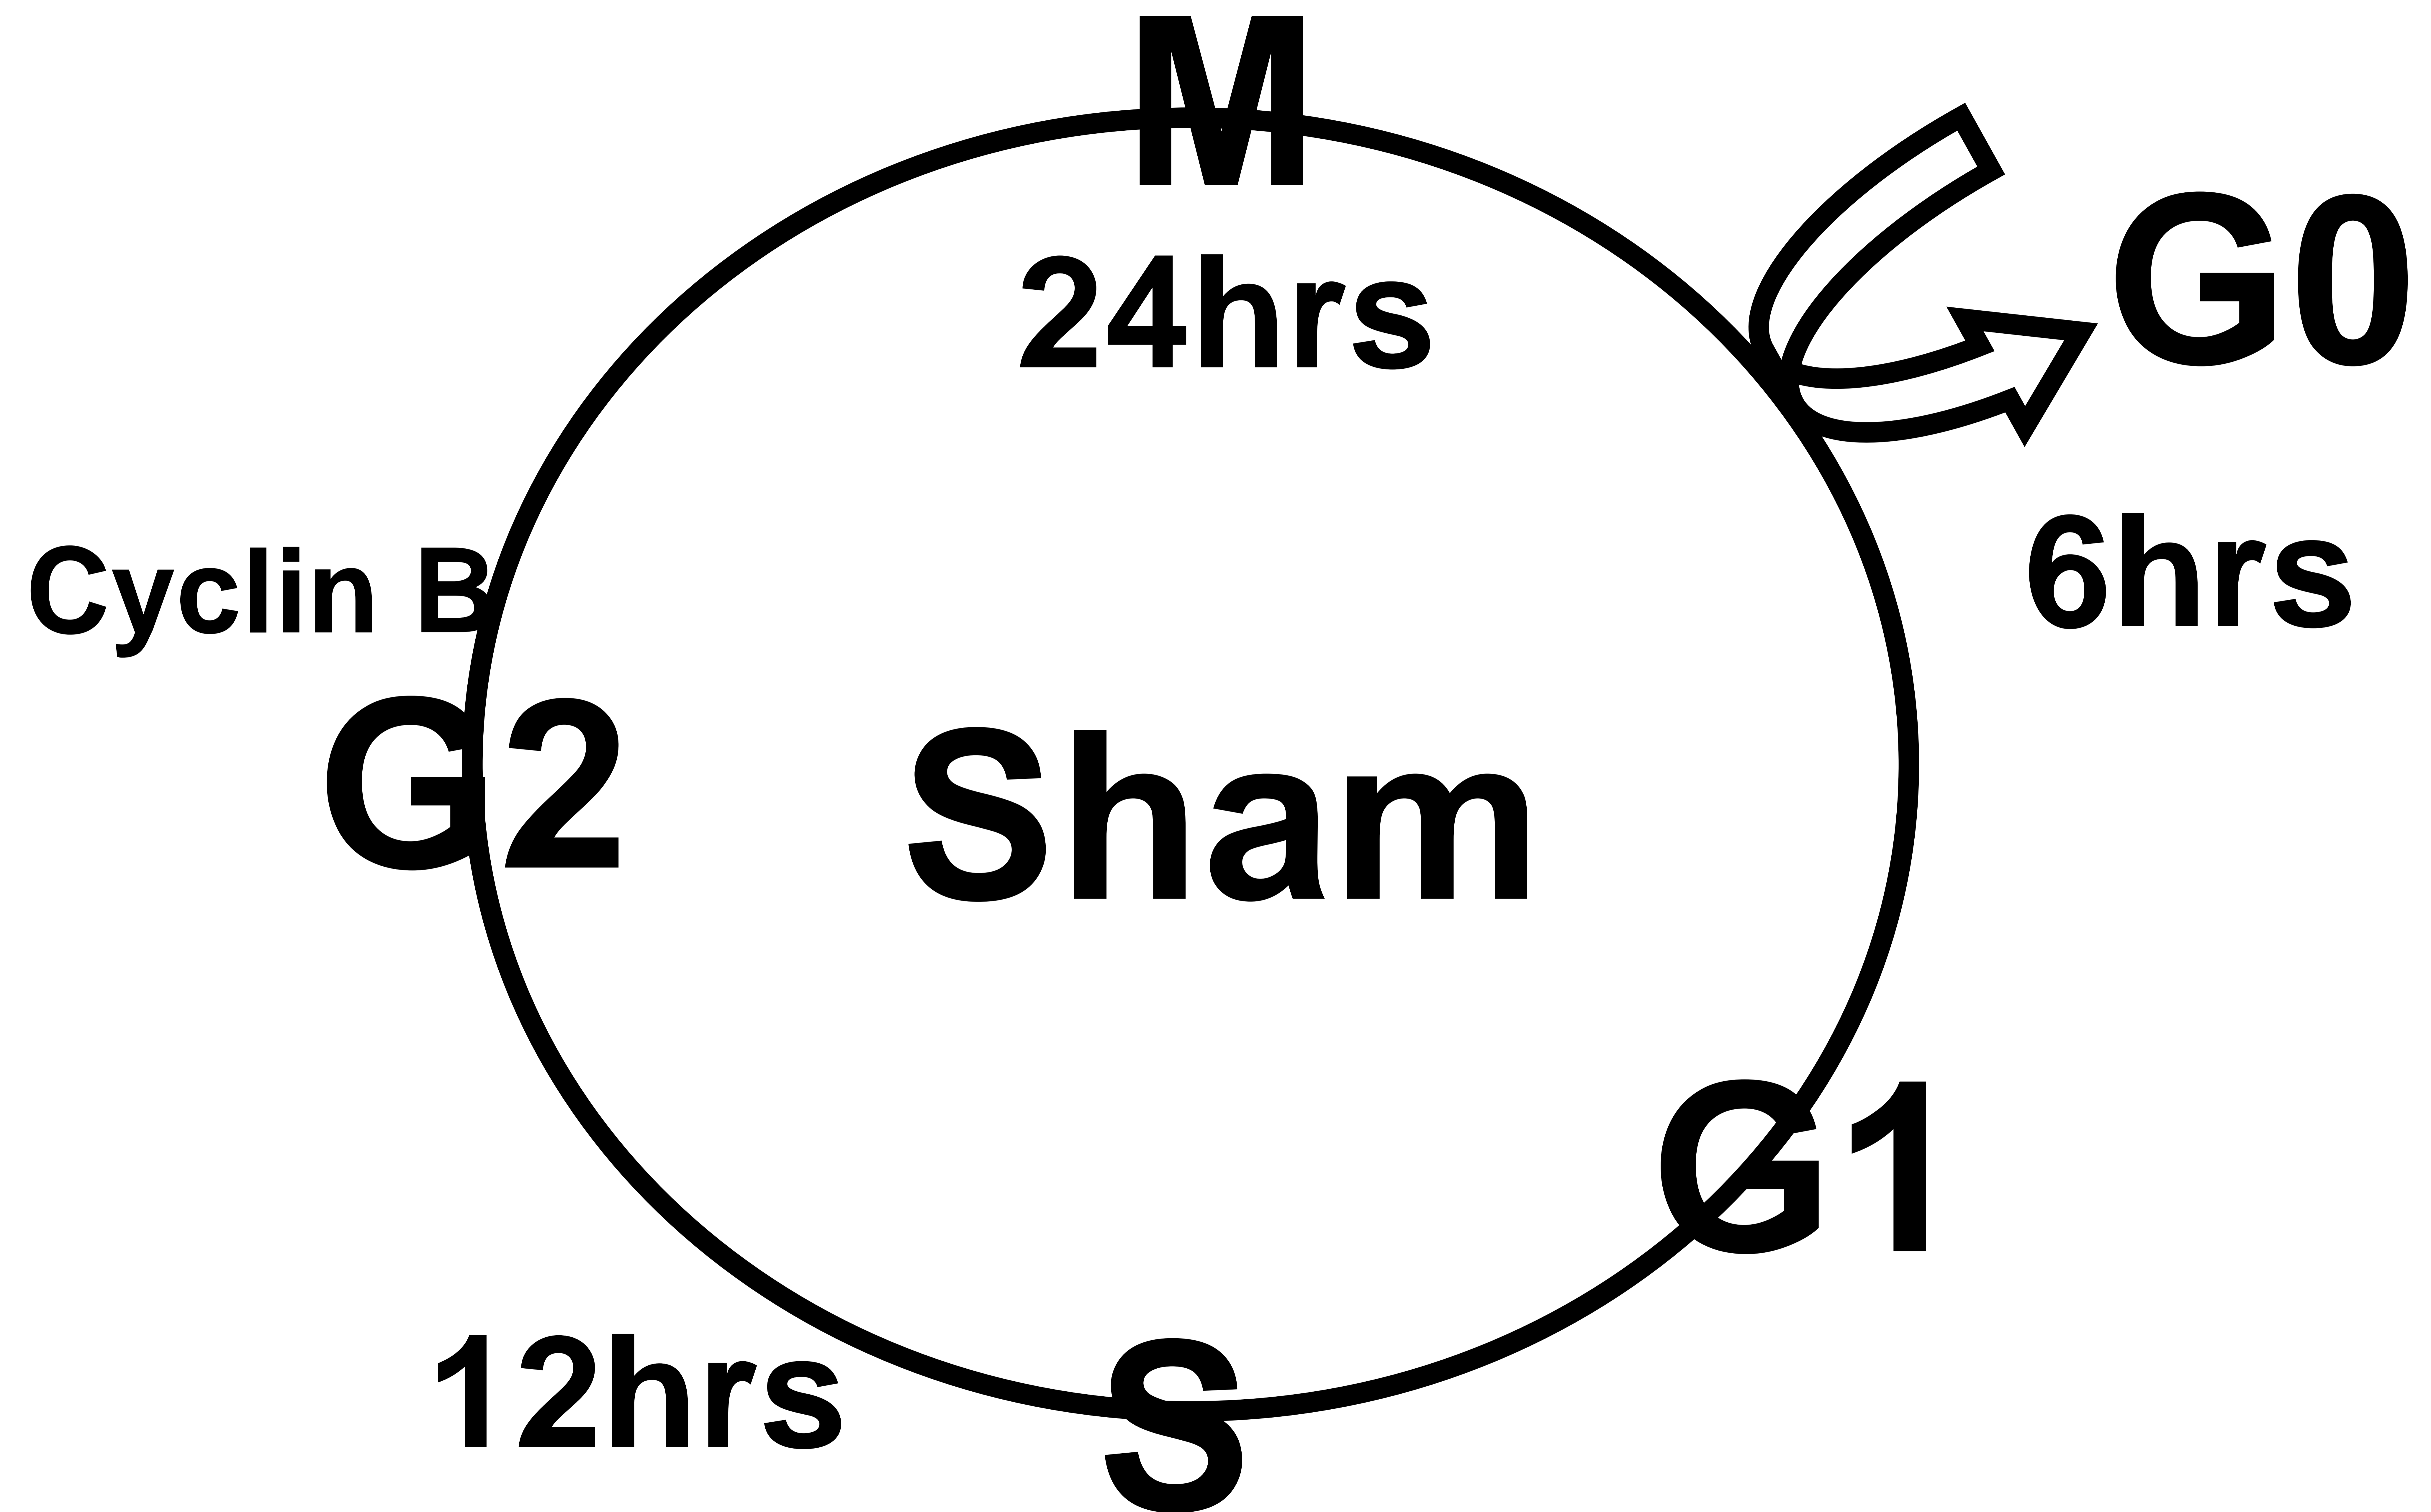

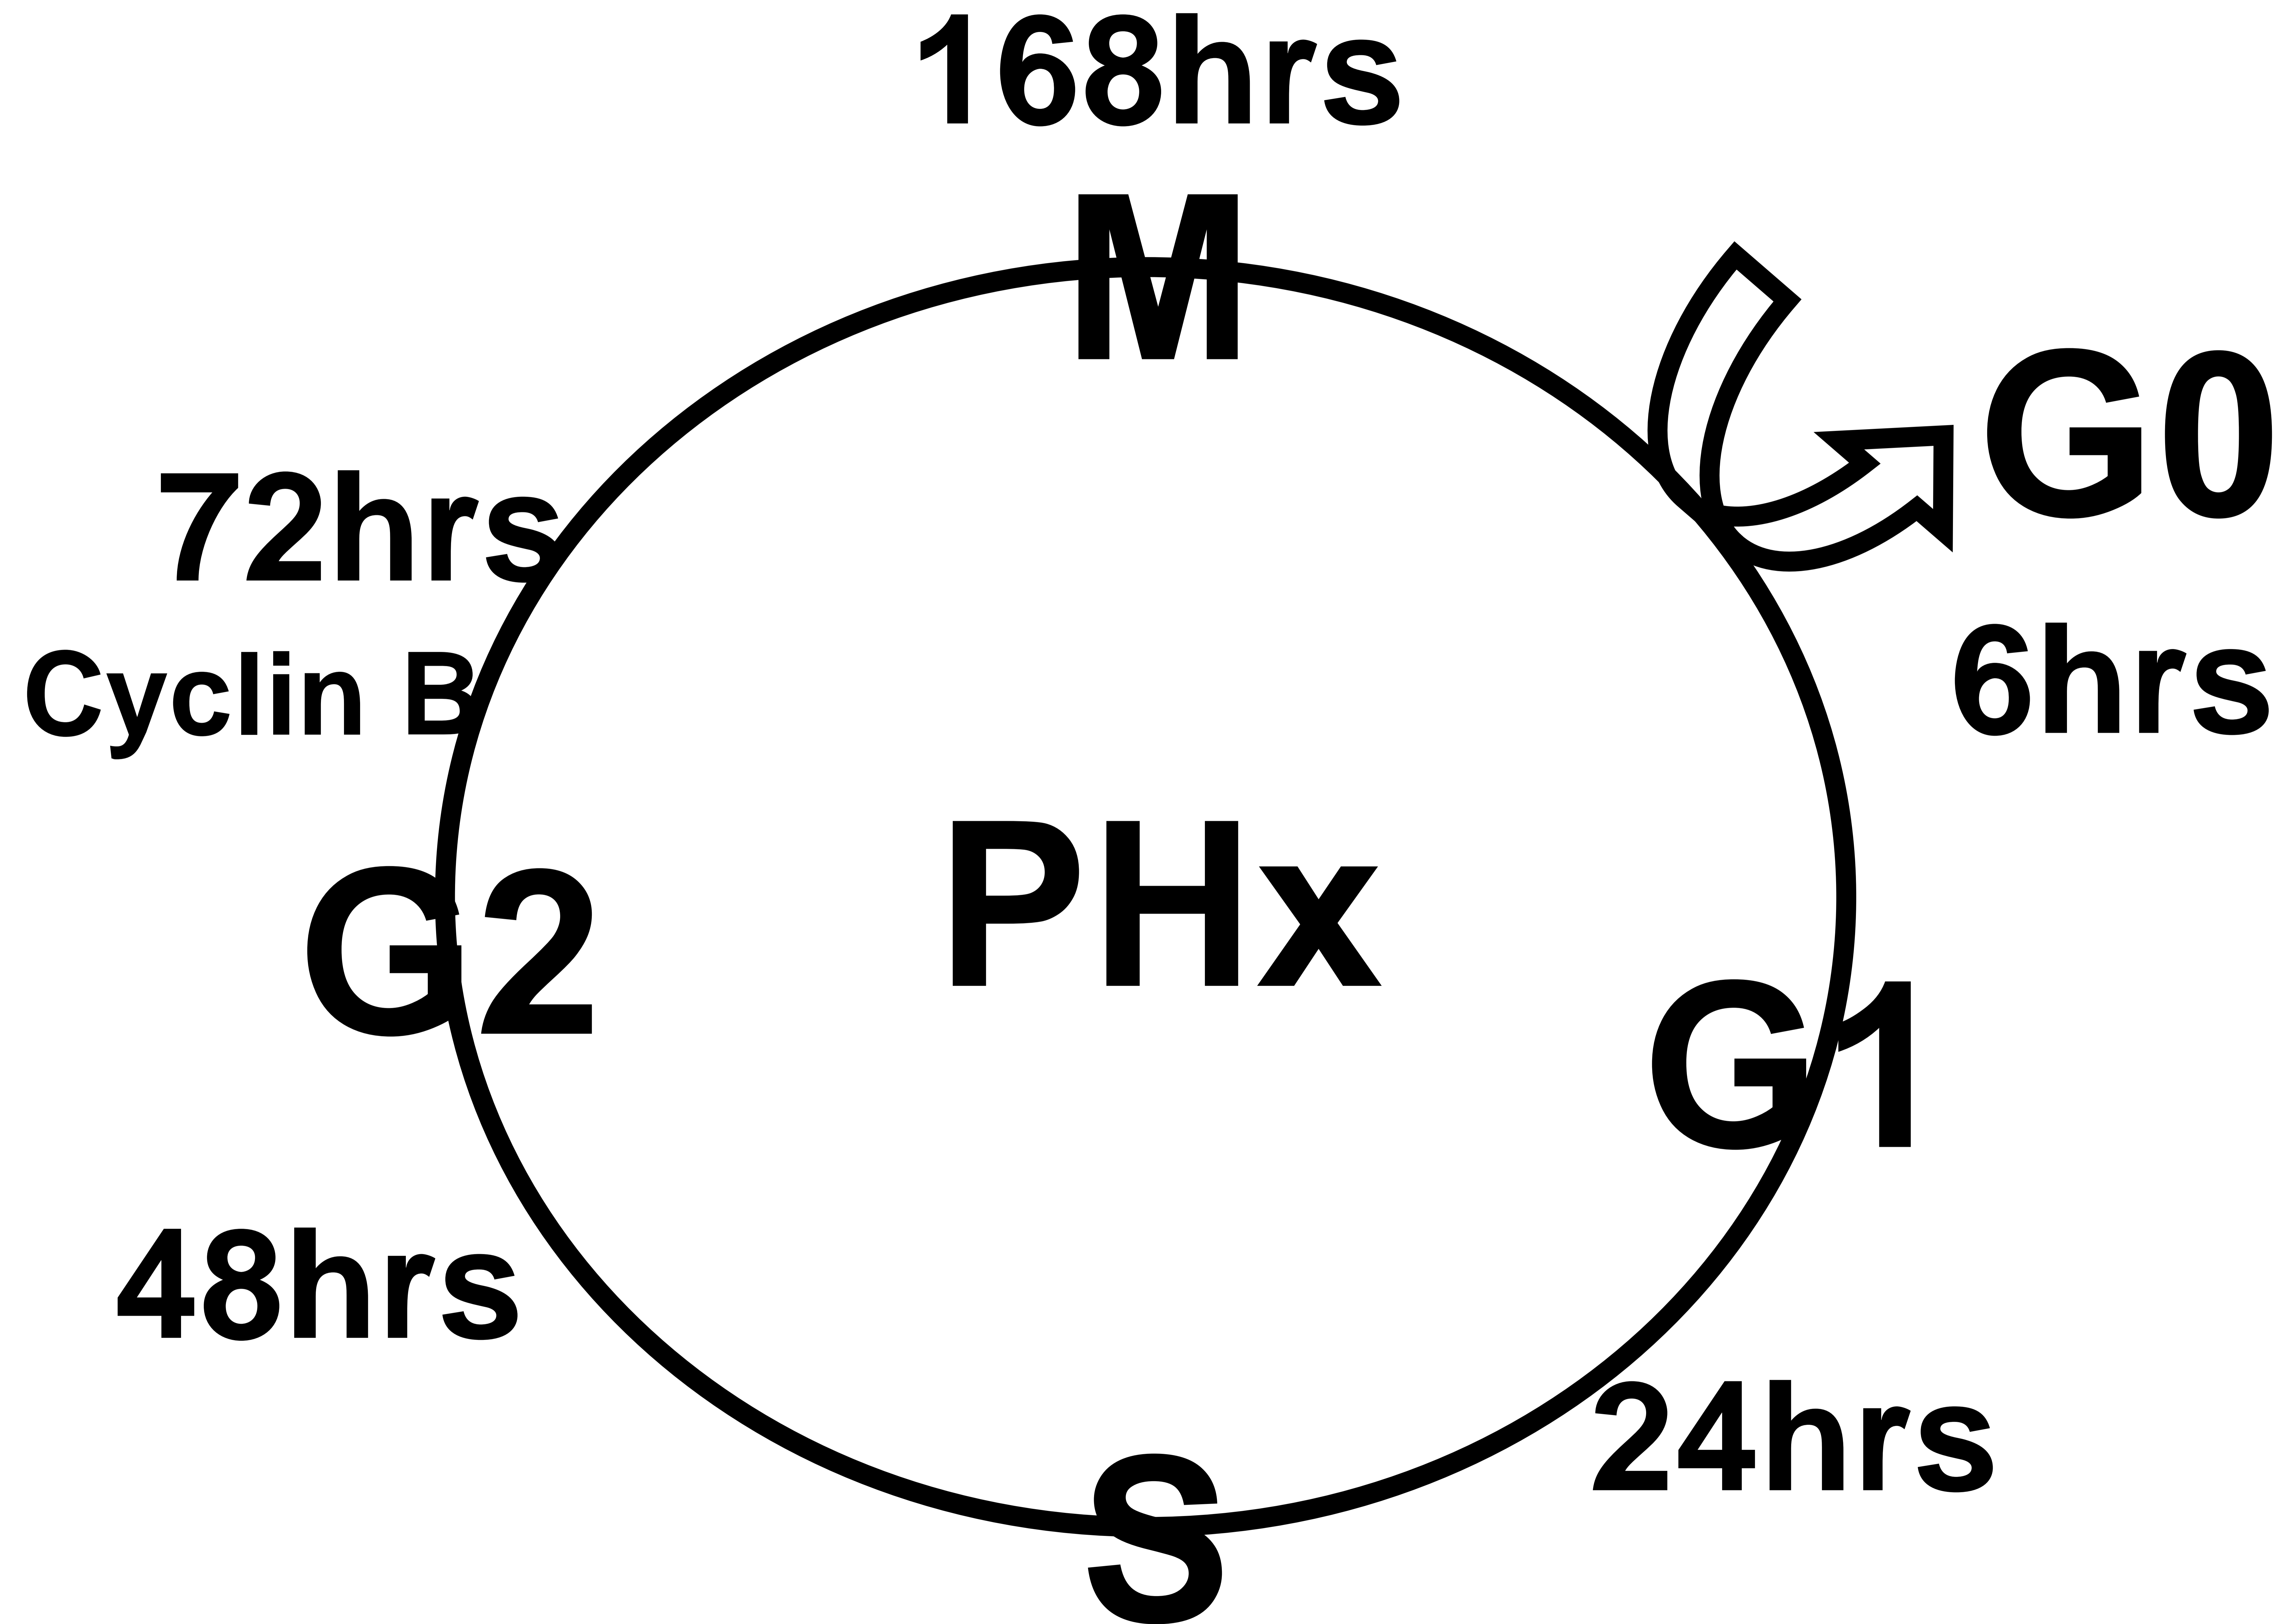

**Cyclin B (6hrs)**

**Cyclin B (24hrs)**

**Cyclin B (72hrs)**

$\alpha$ -Tubulin

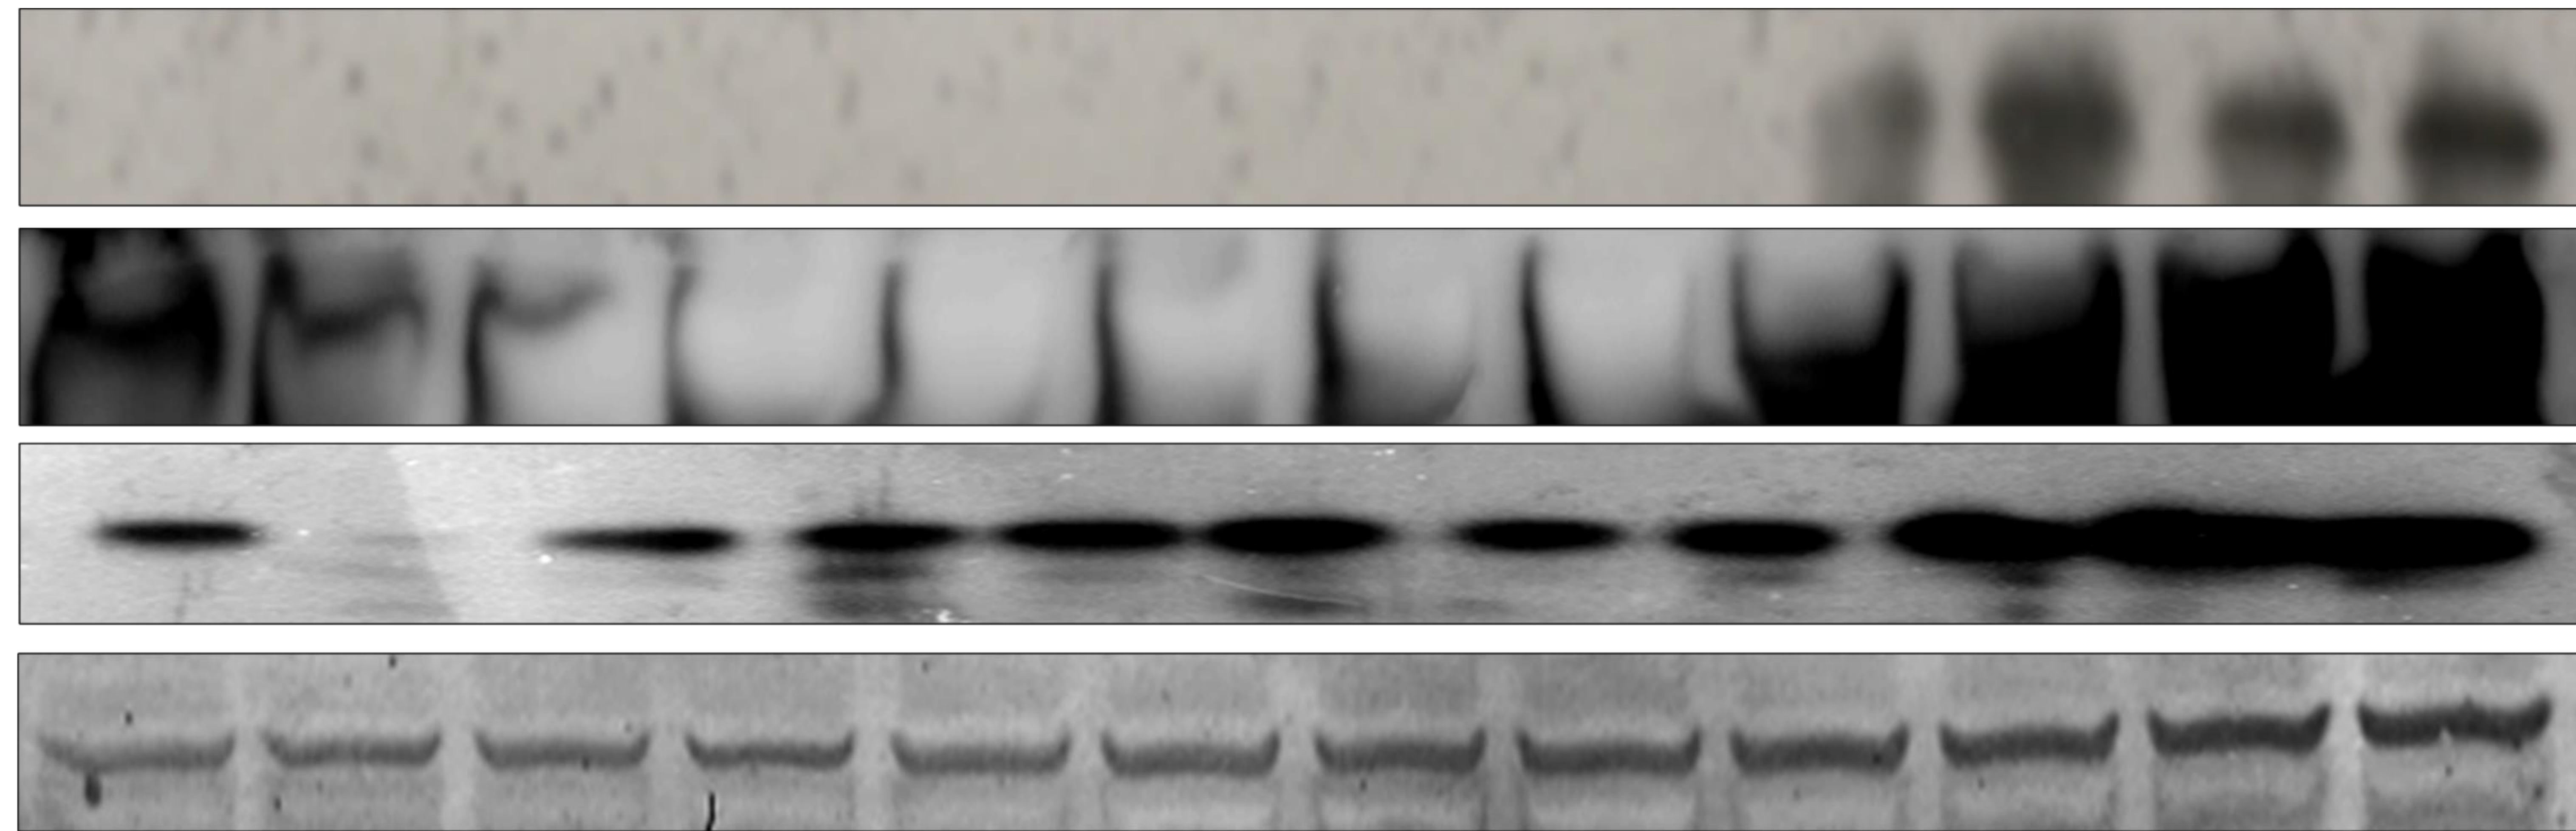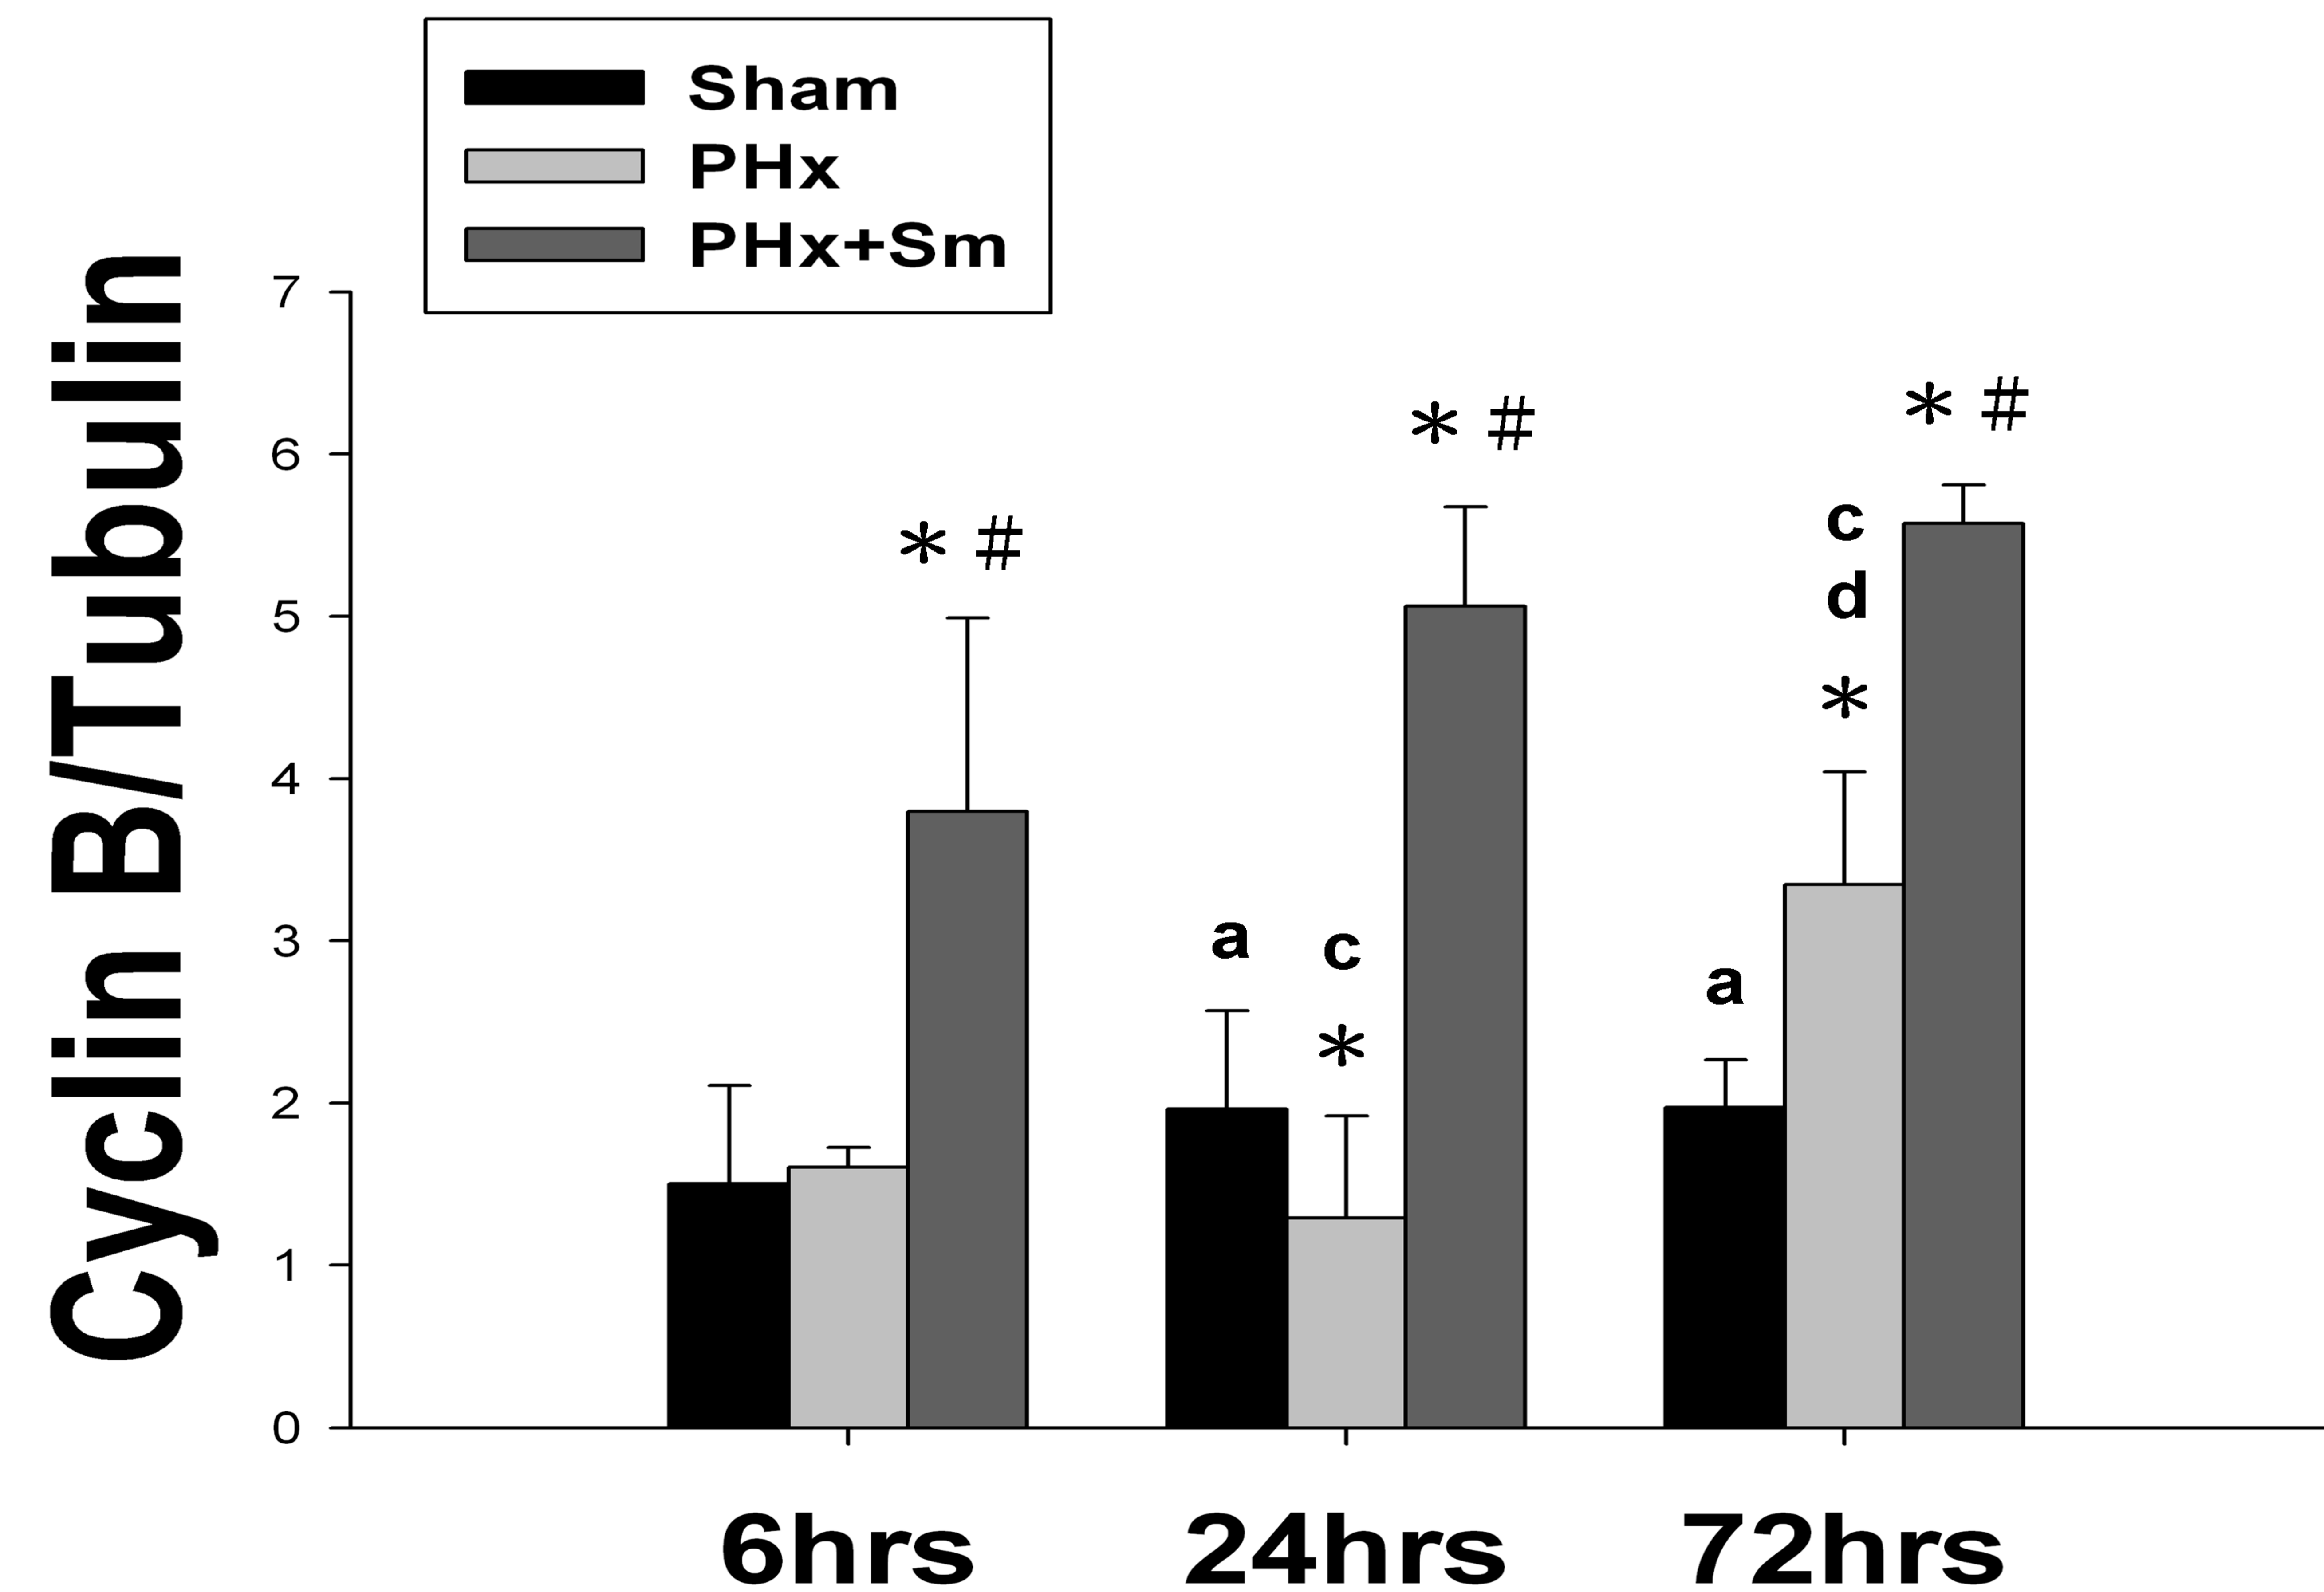

Cyclin B (6hrs)

Cyclin B (24hrs)

Cyclin B (72hrs)

GAPDH

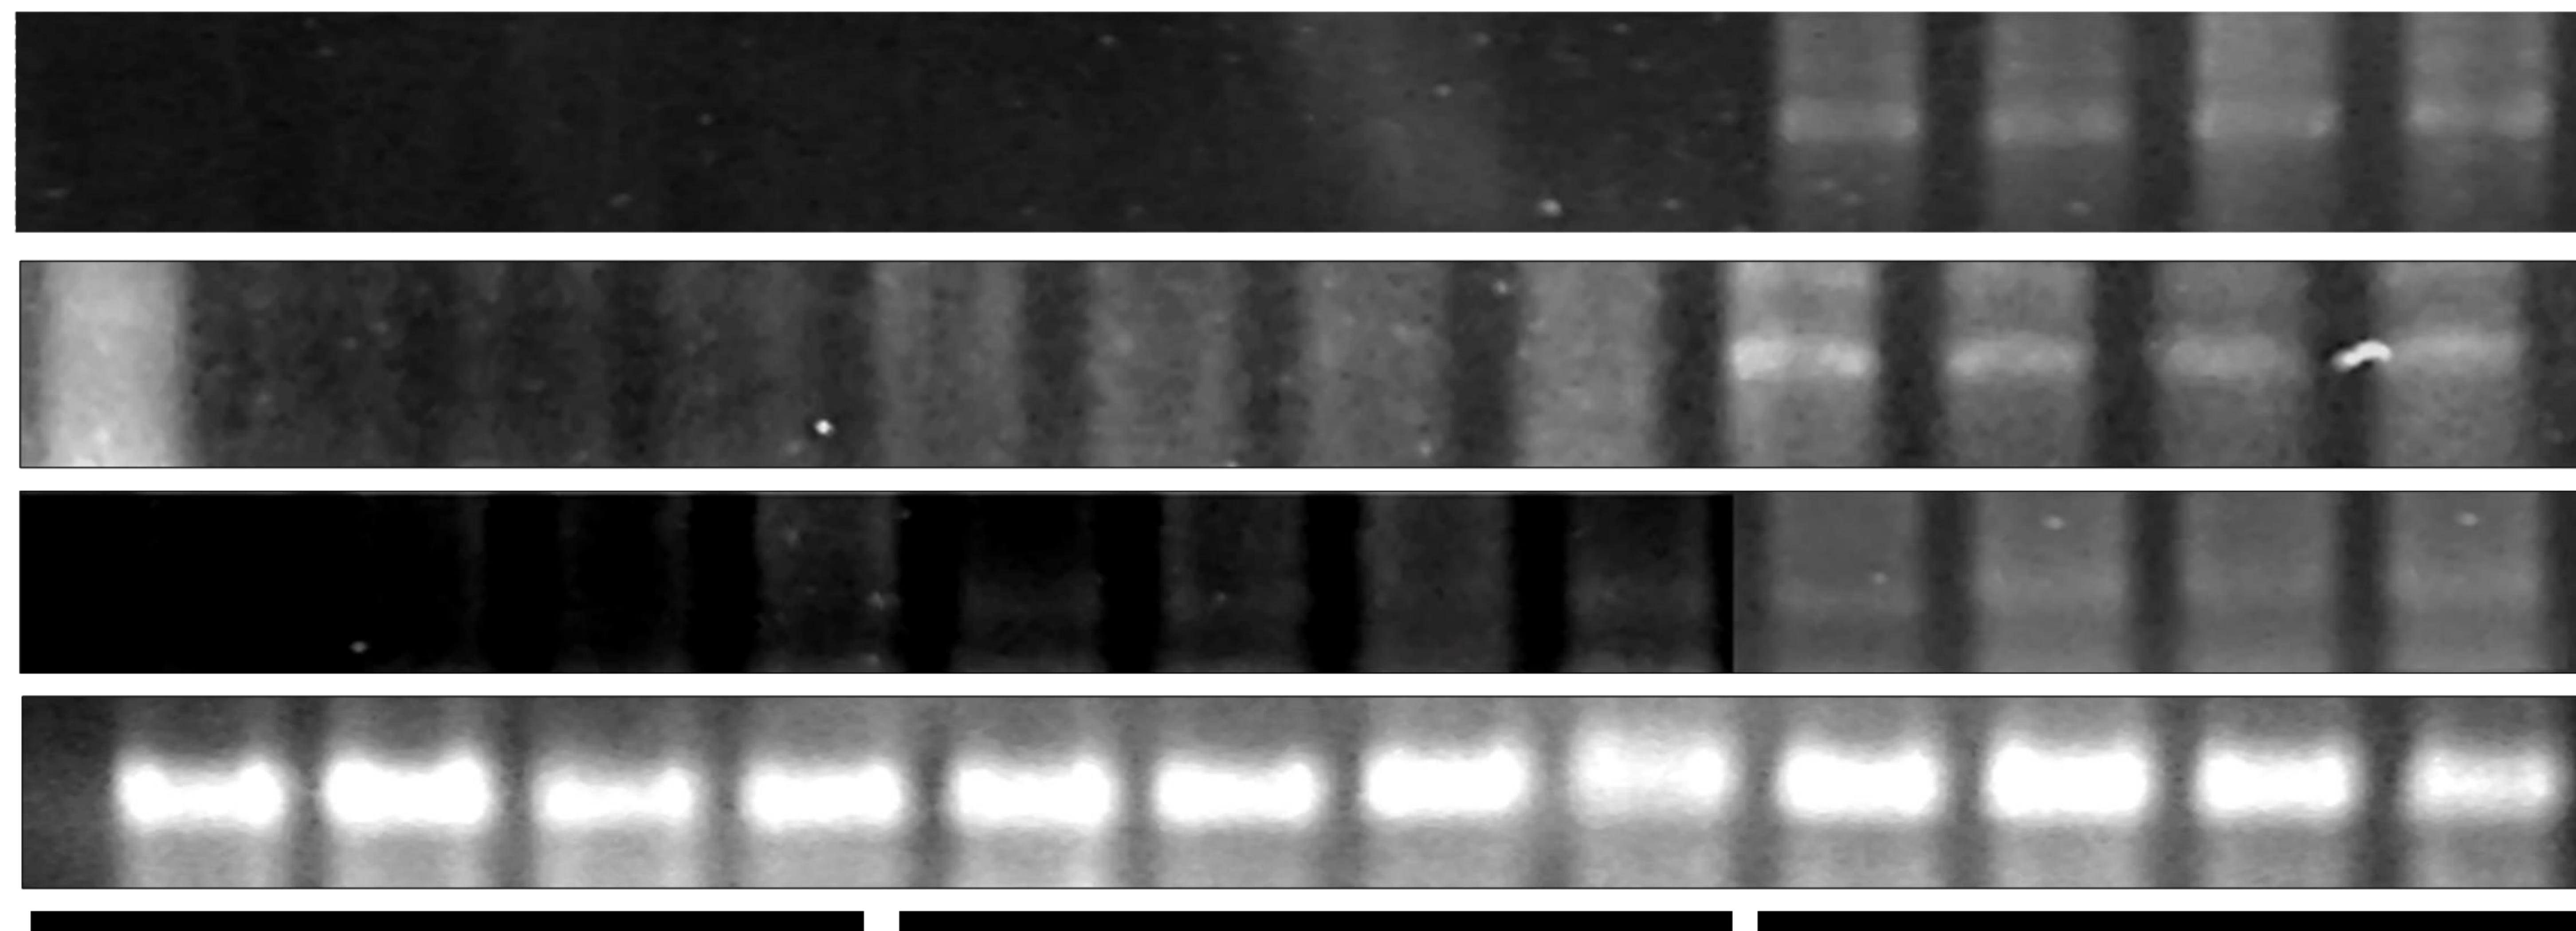

sham

PHx

PHx+Sm

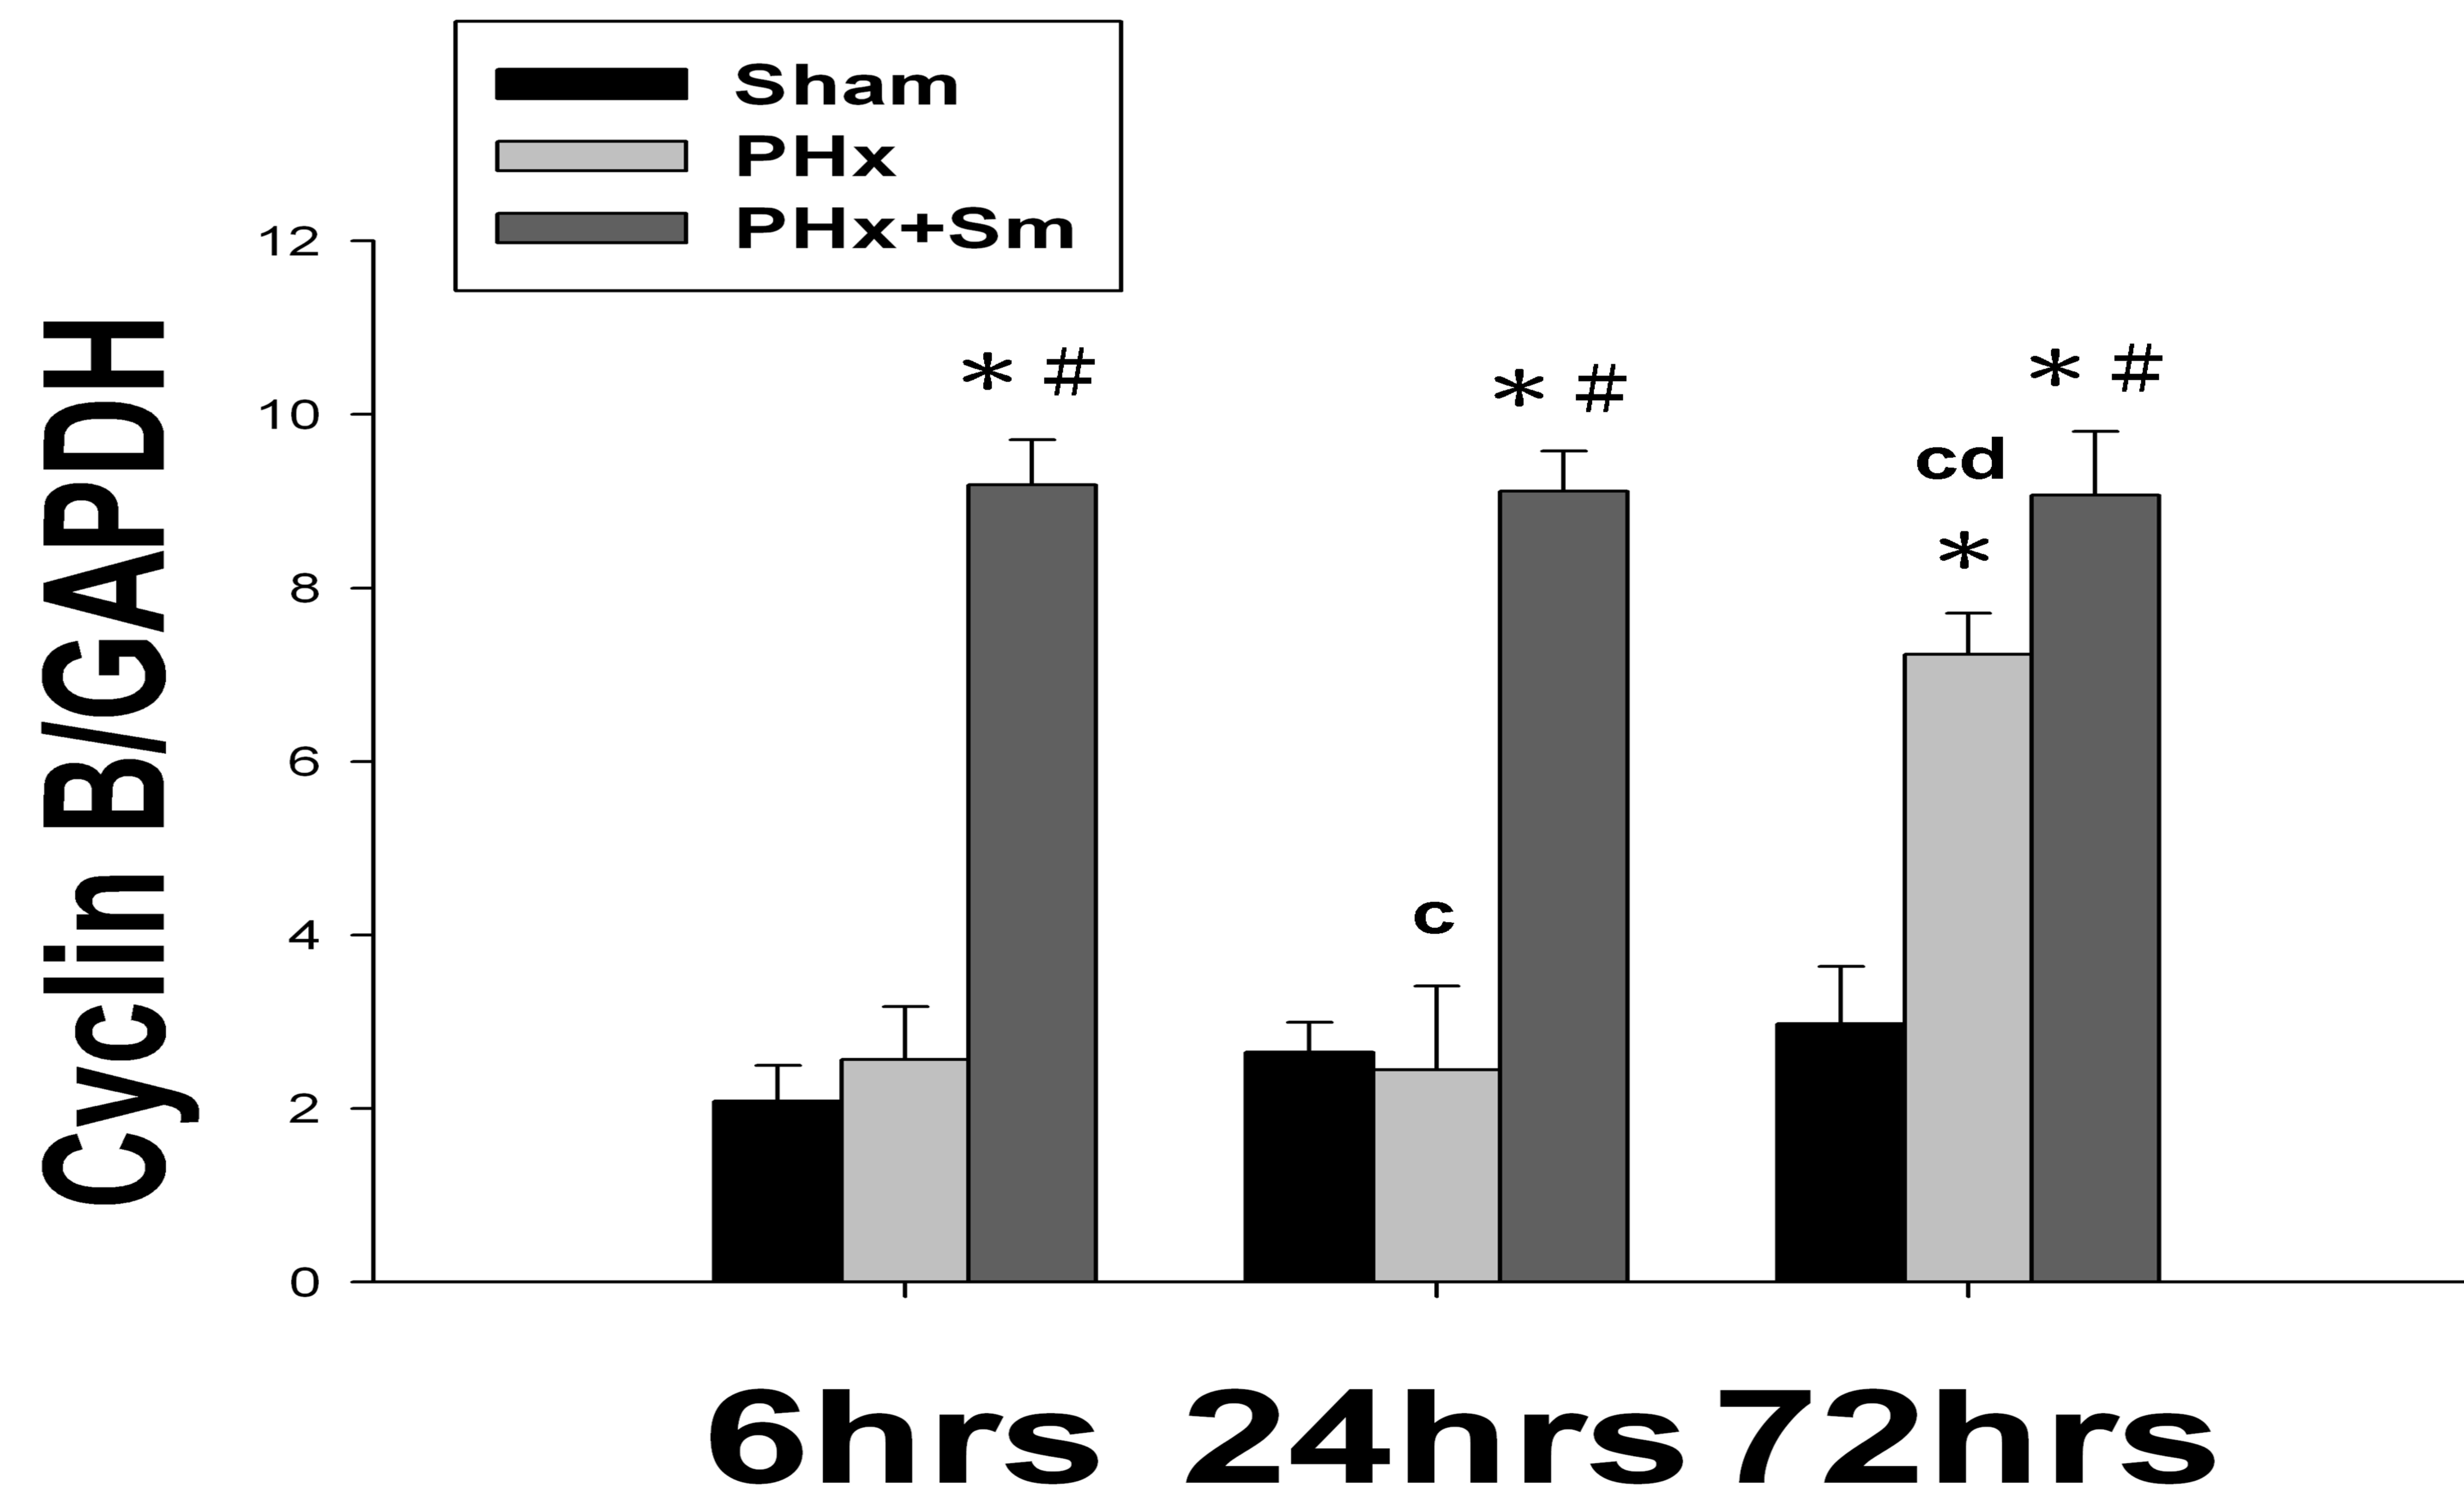

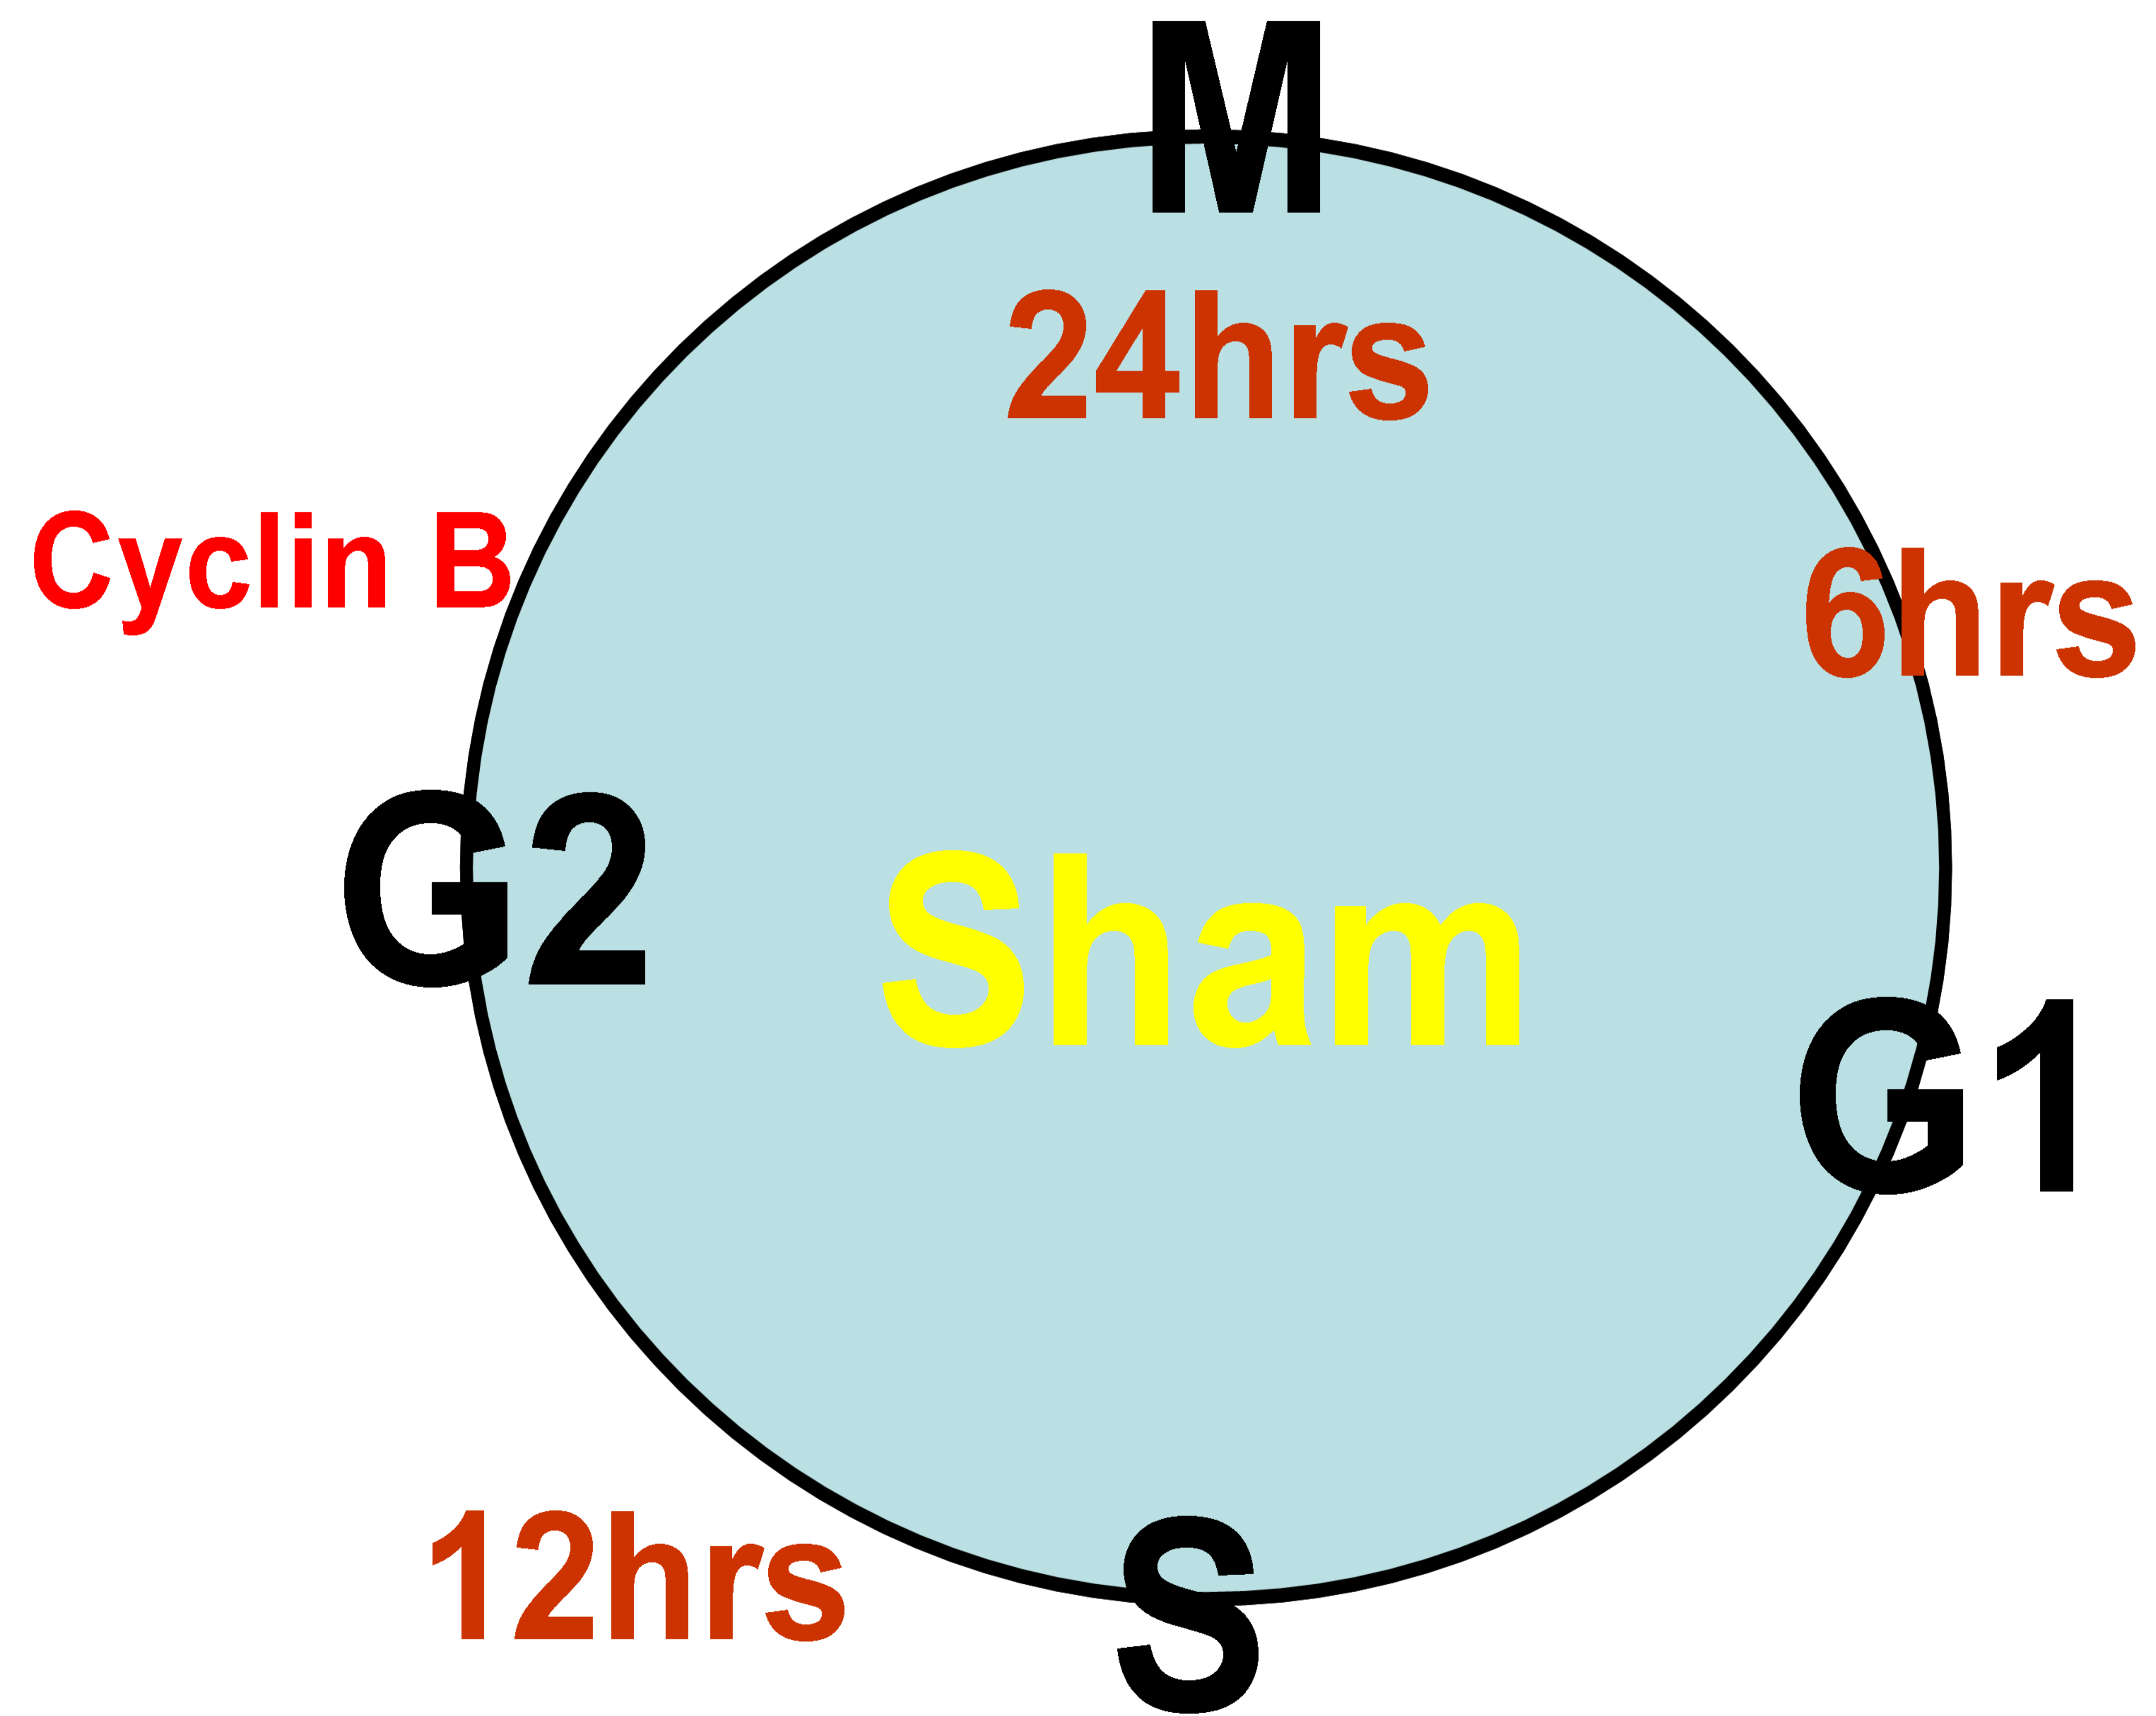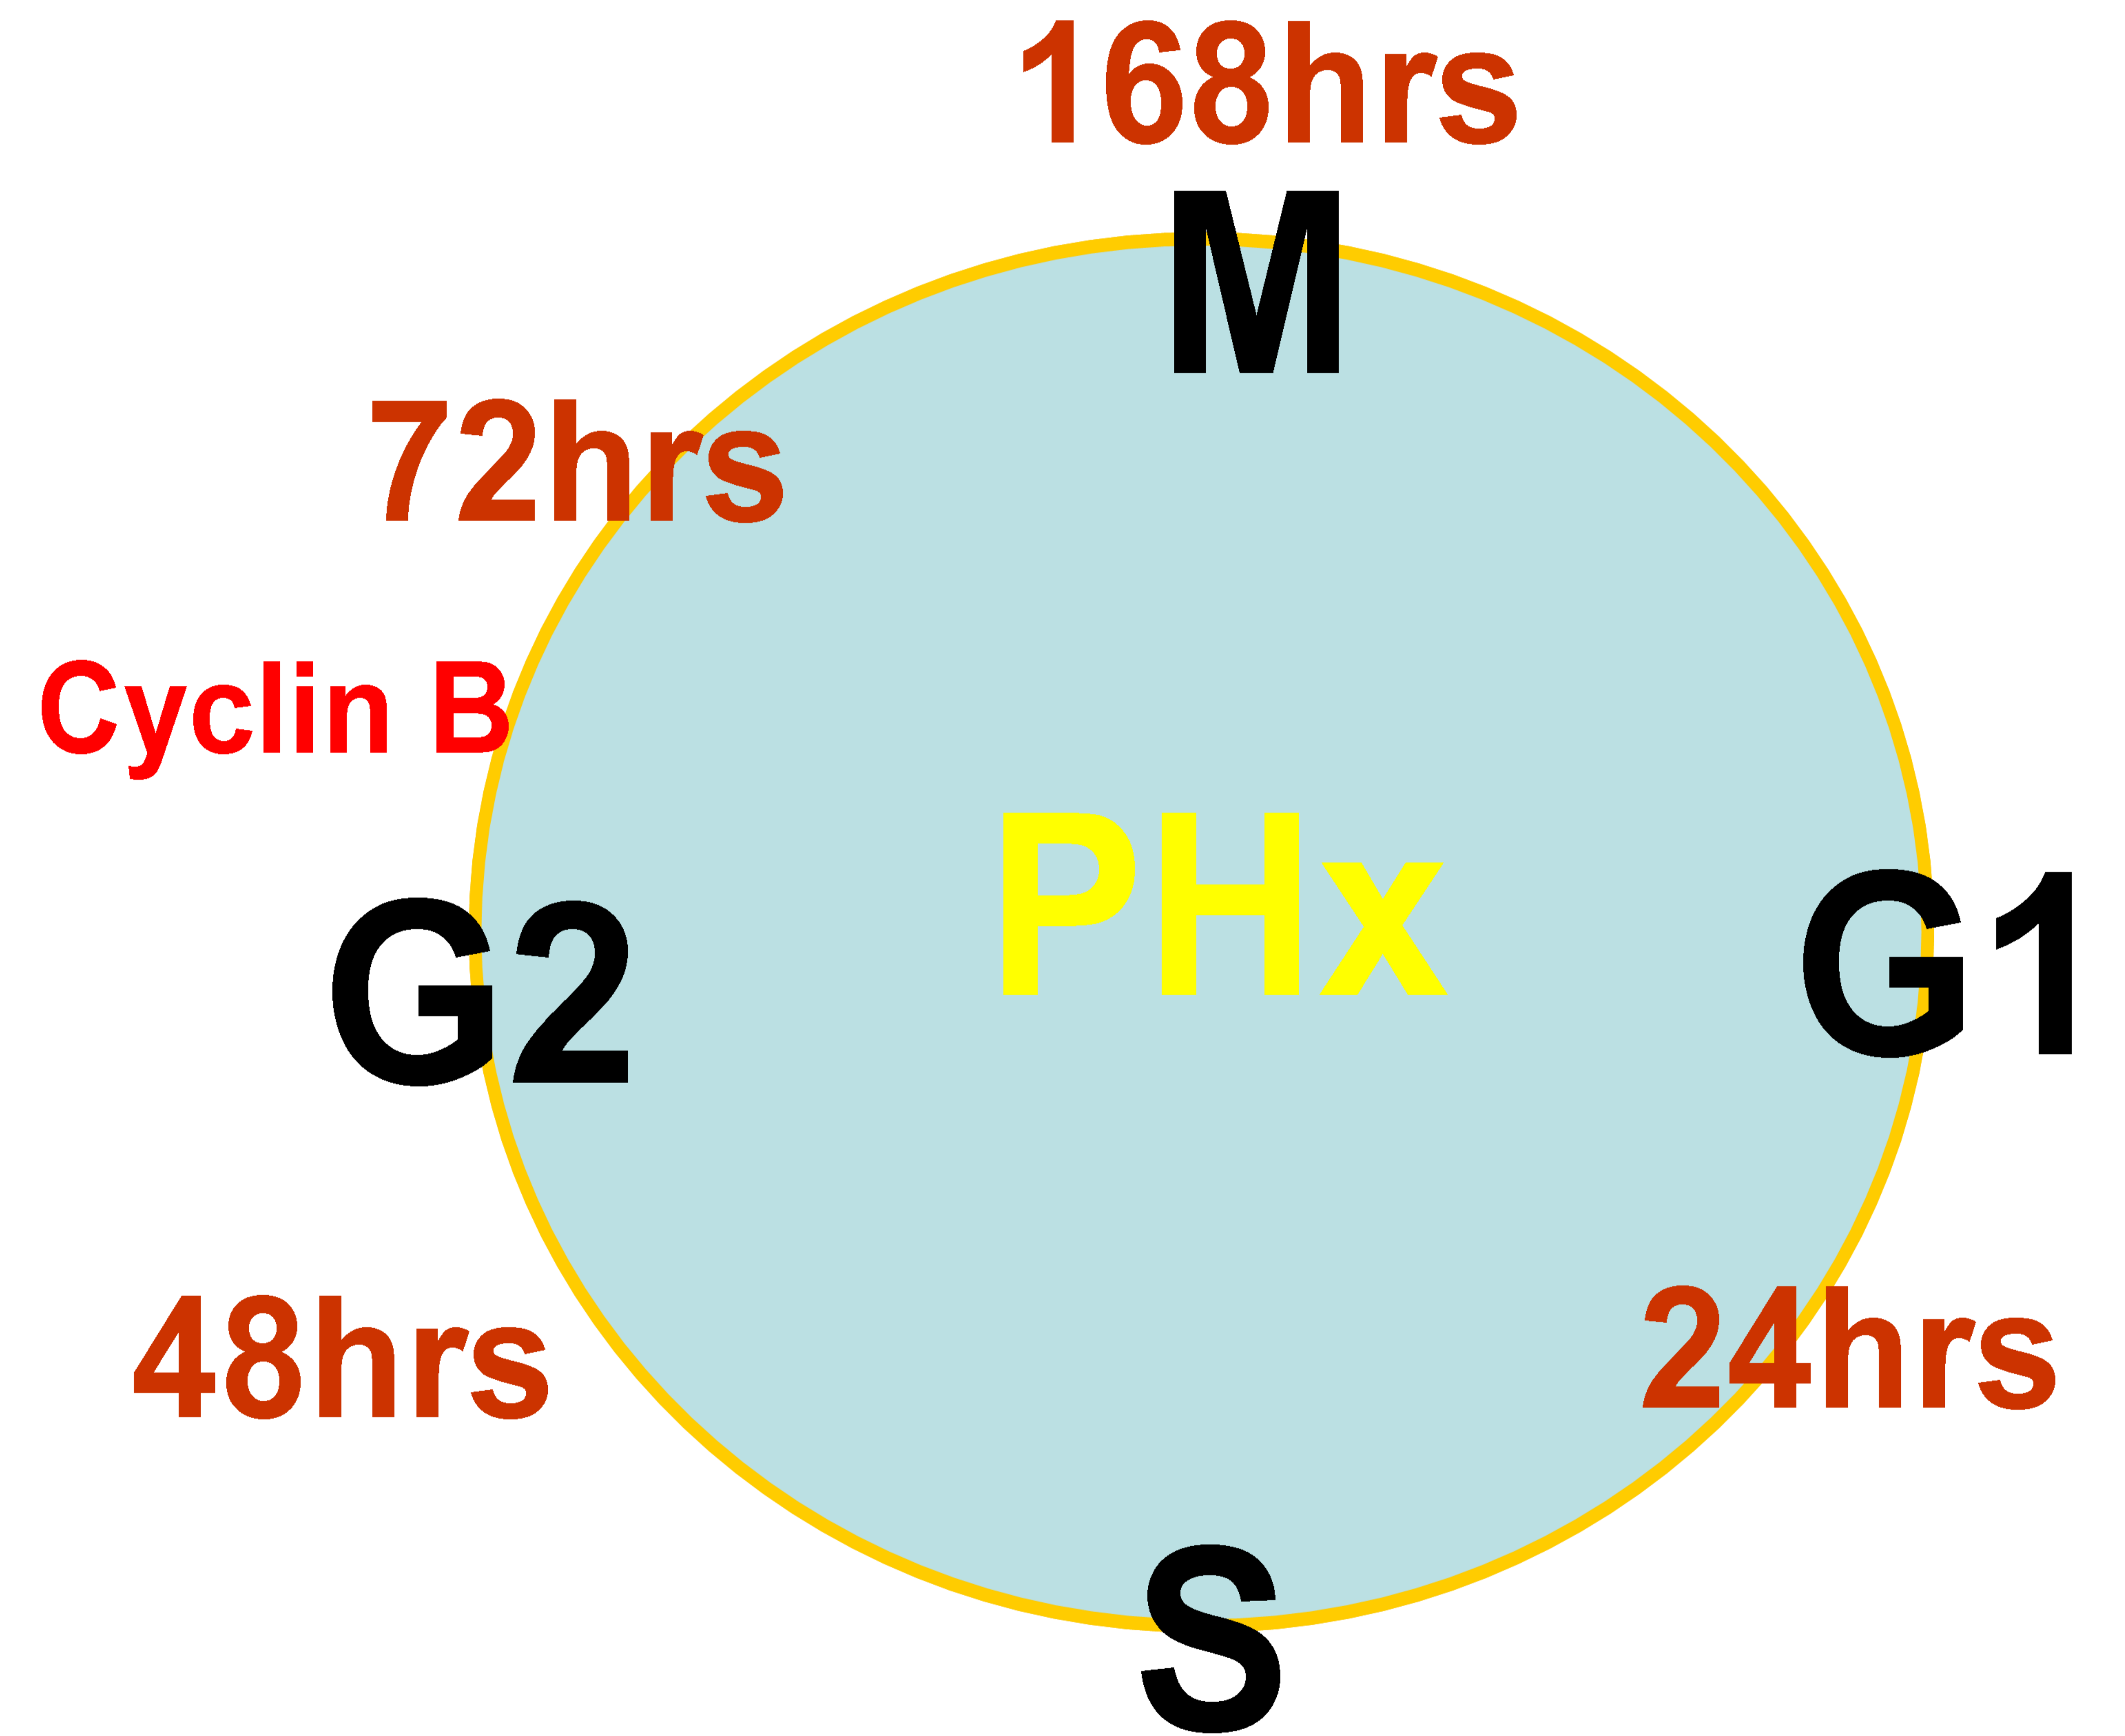

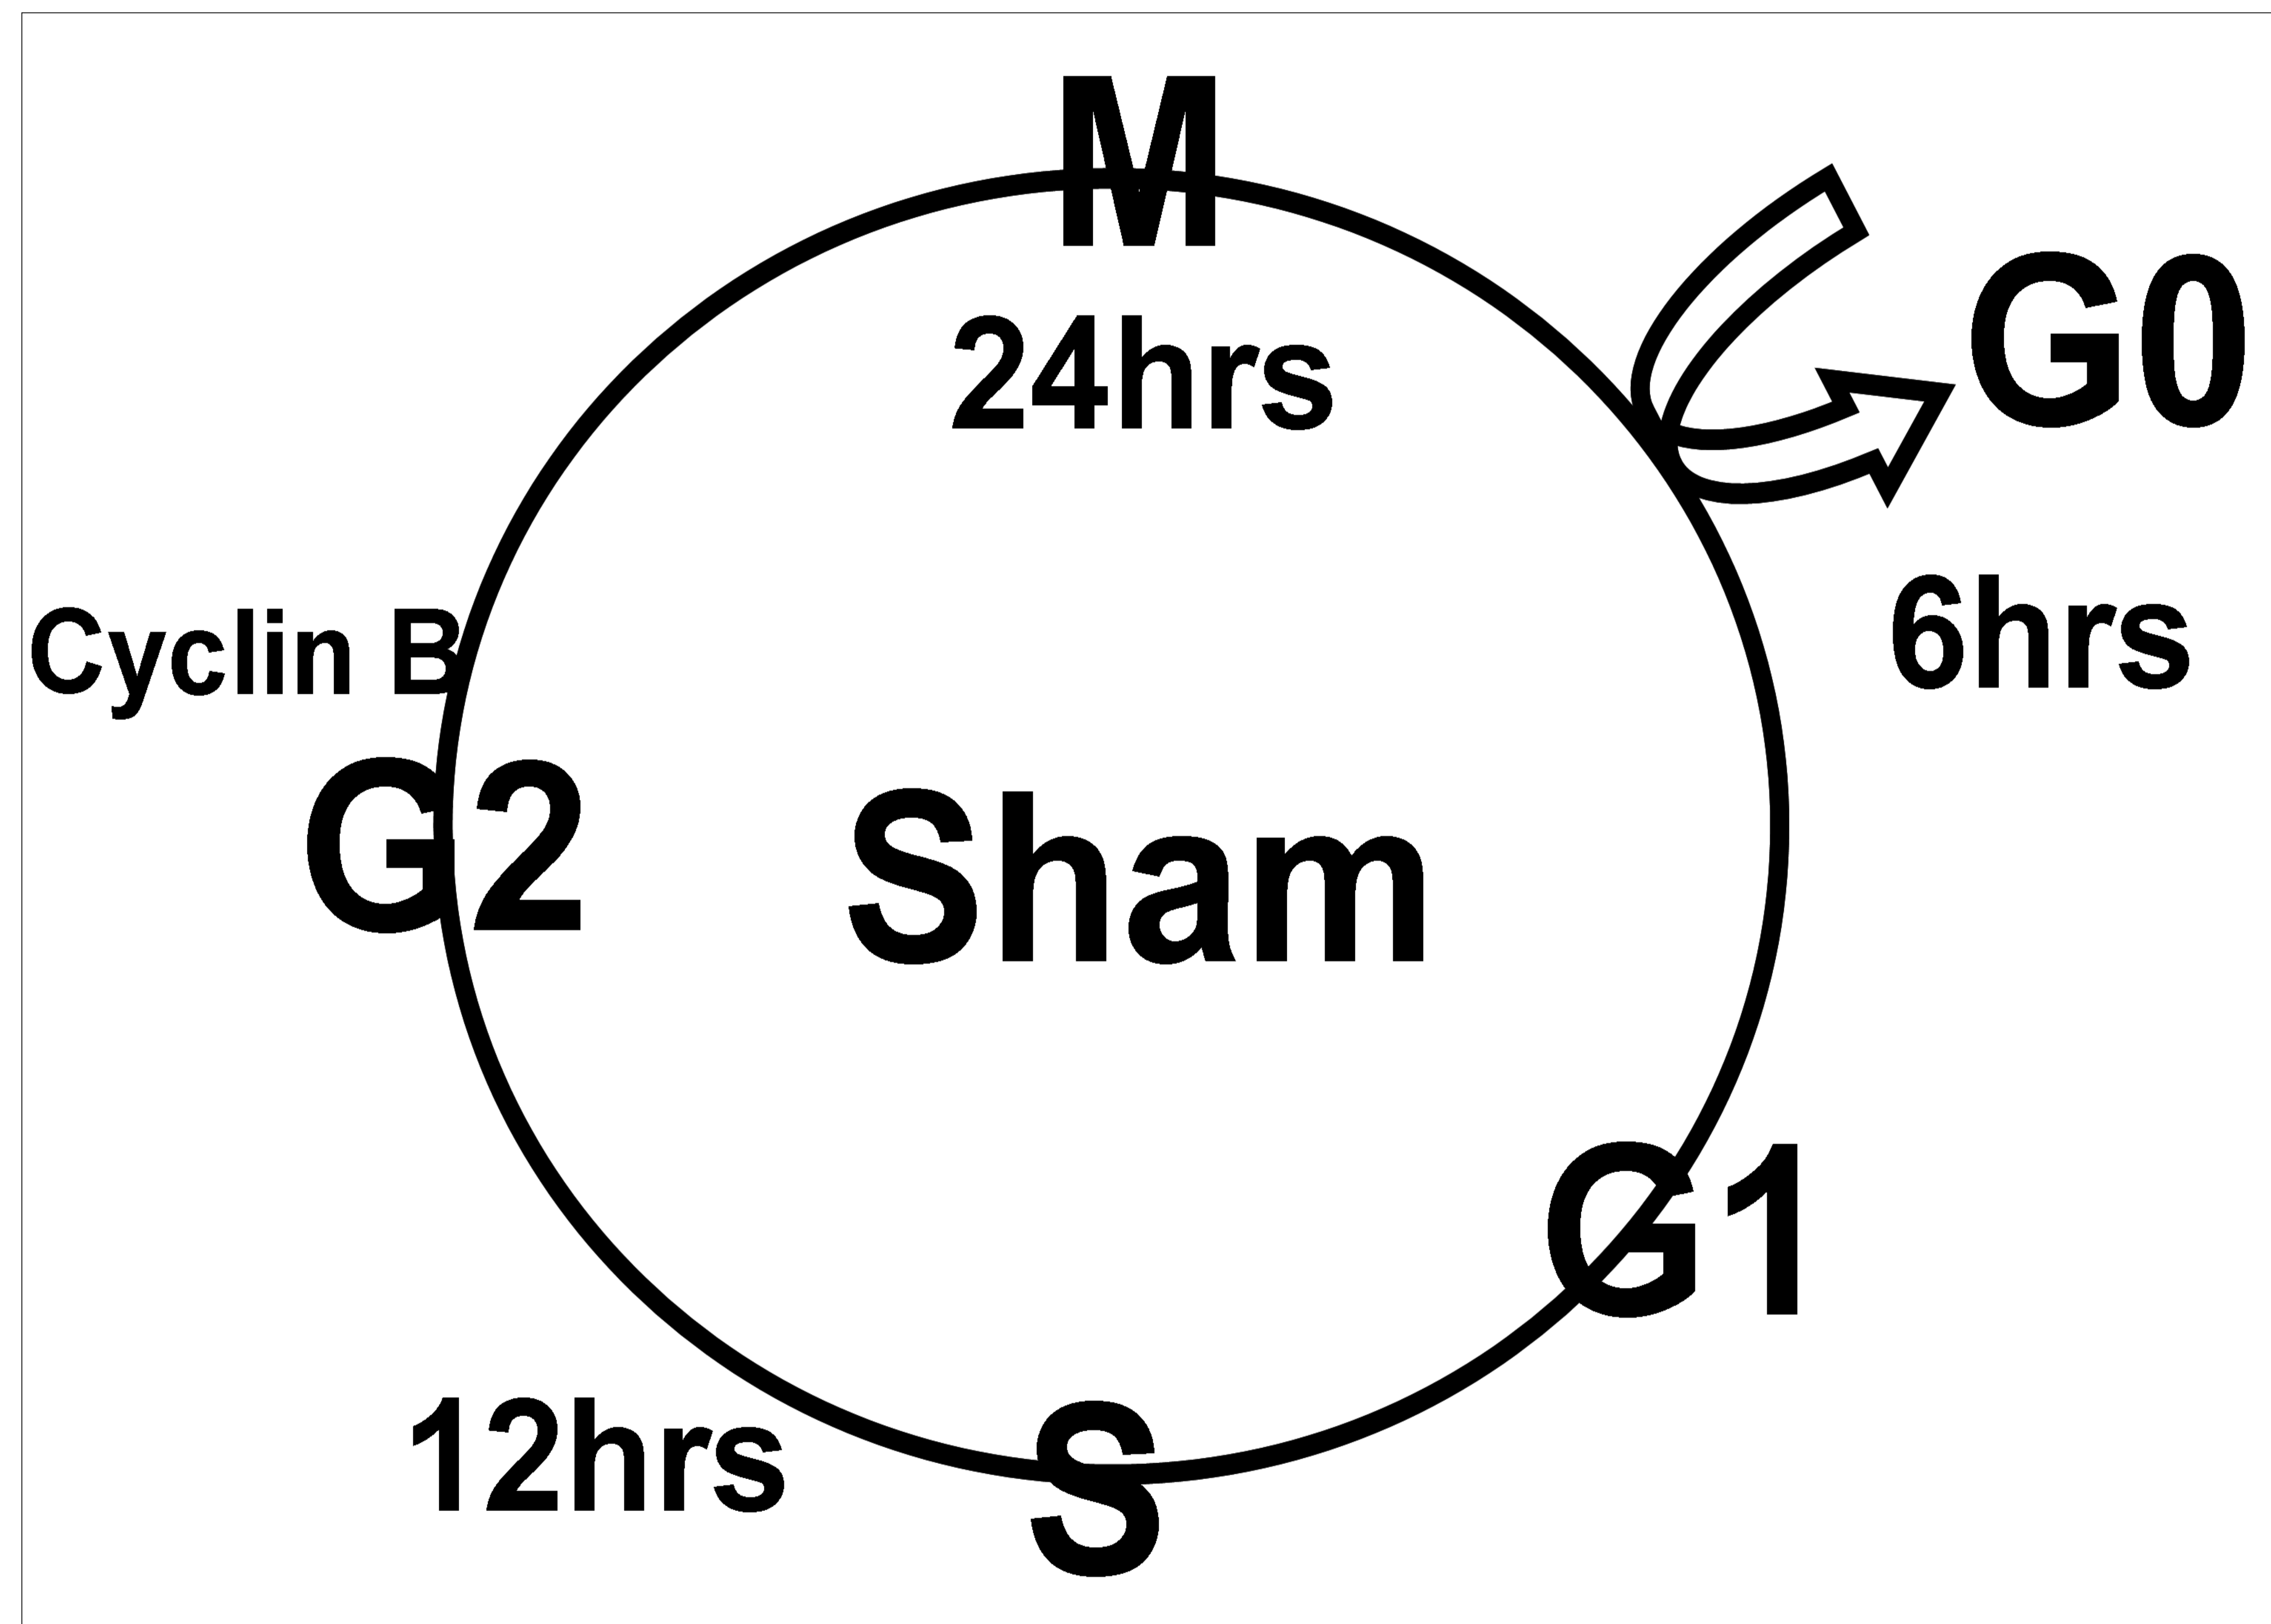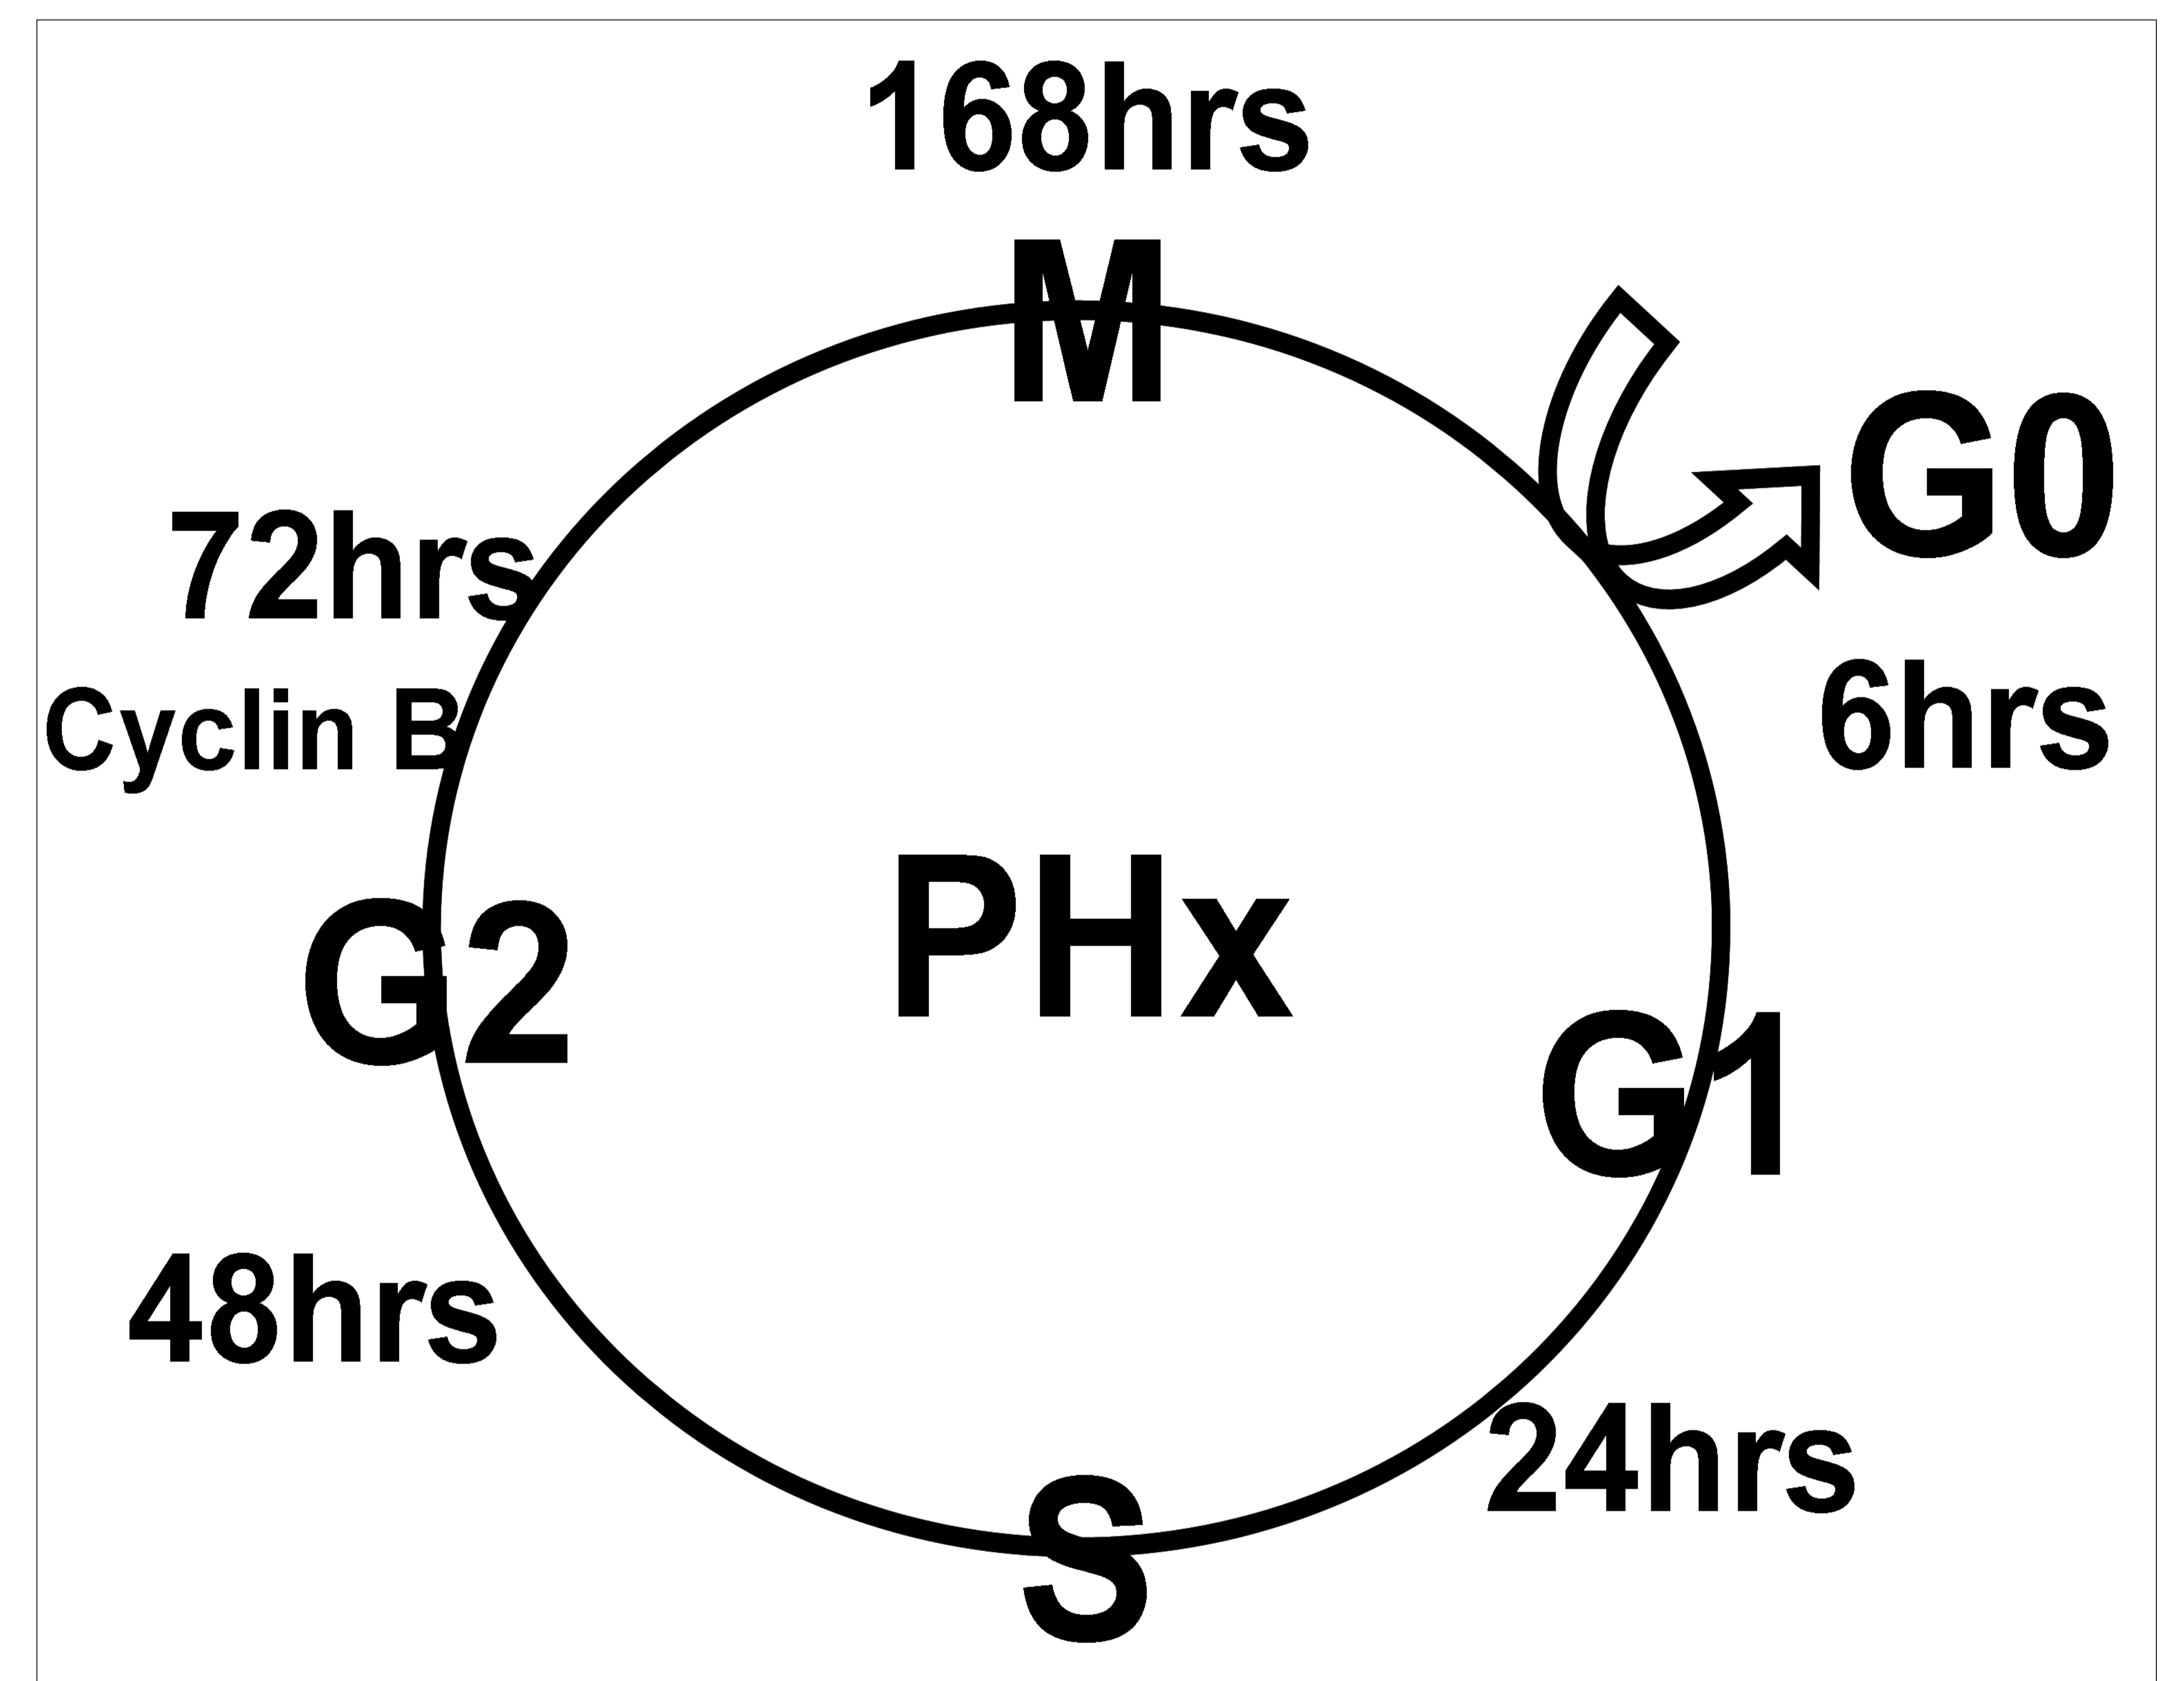

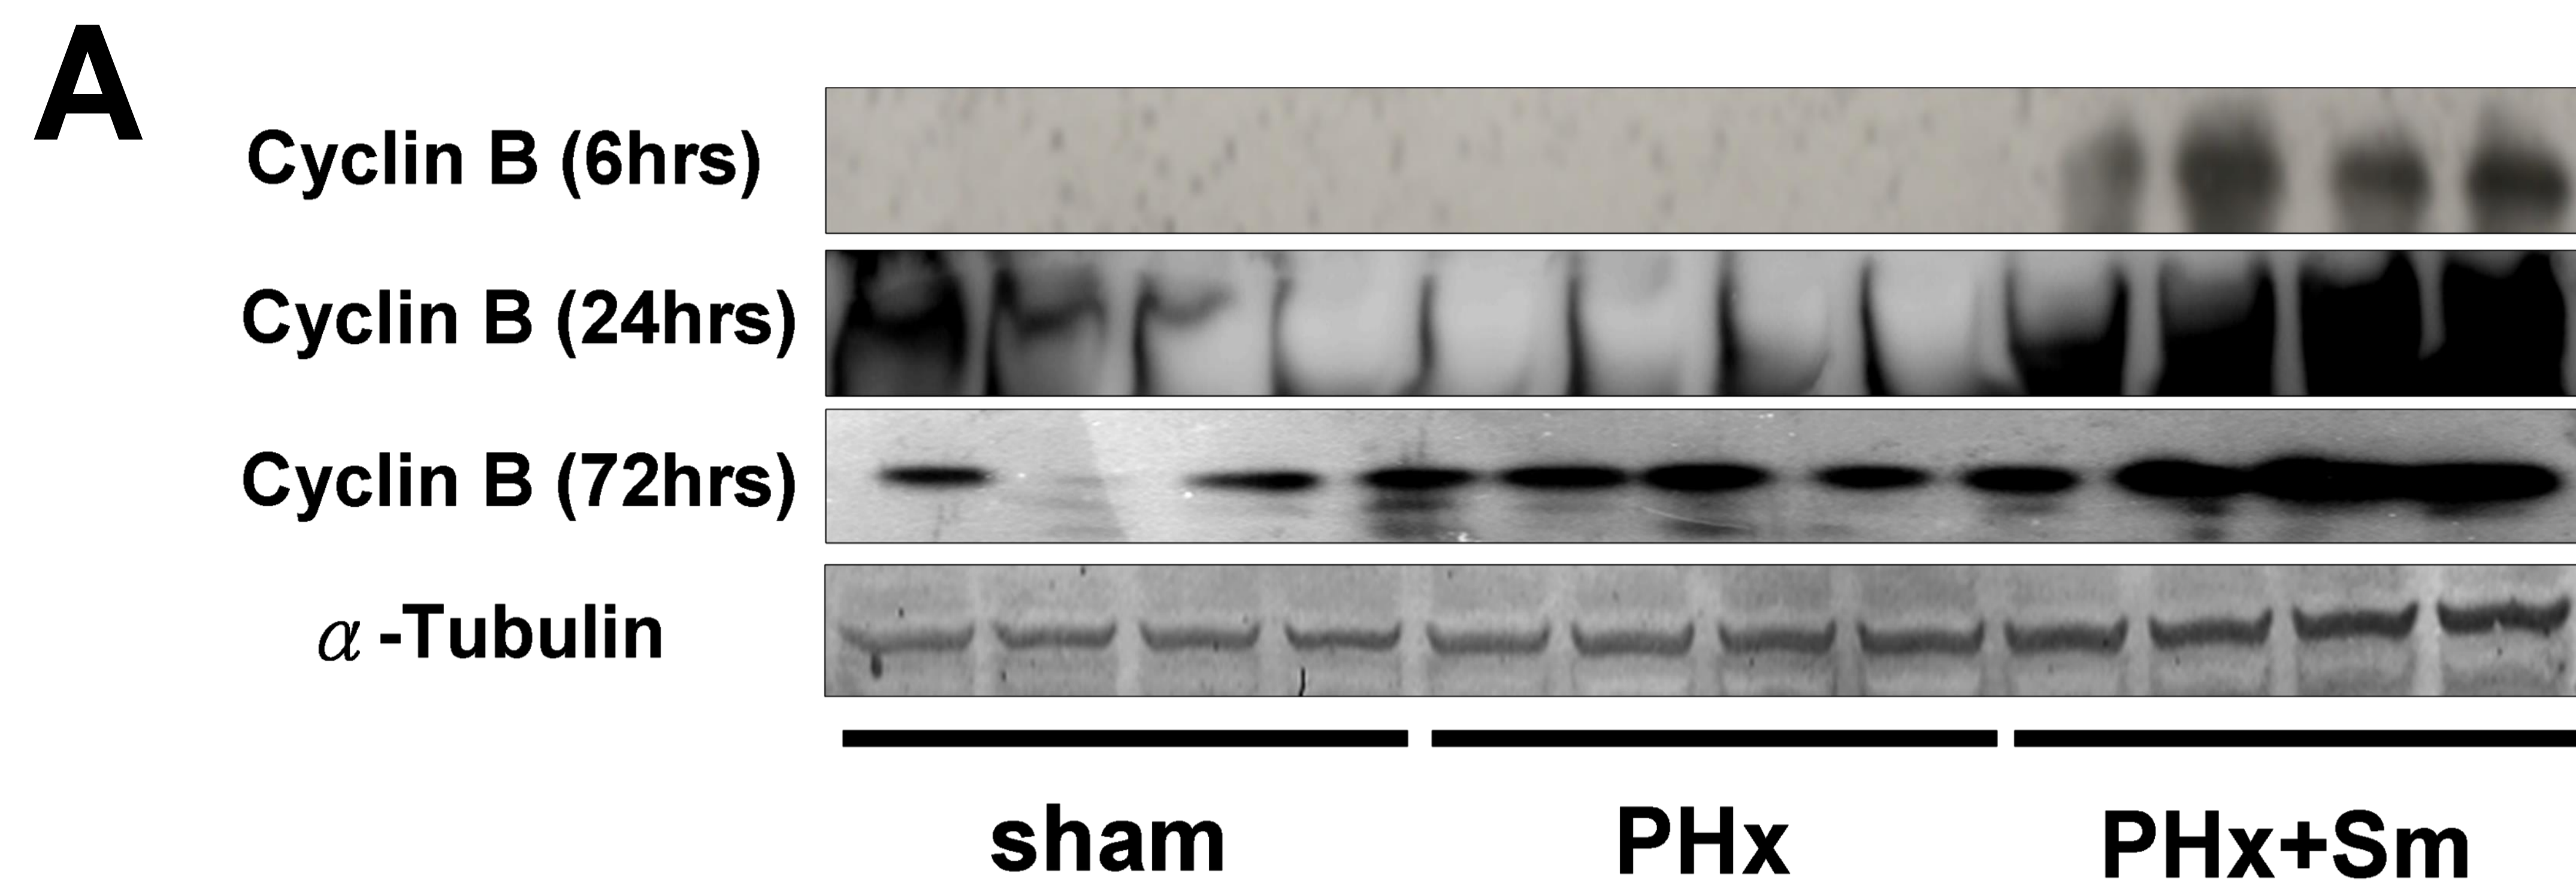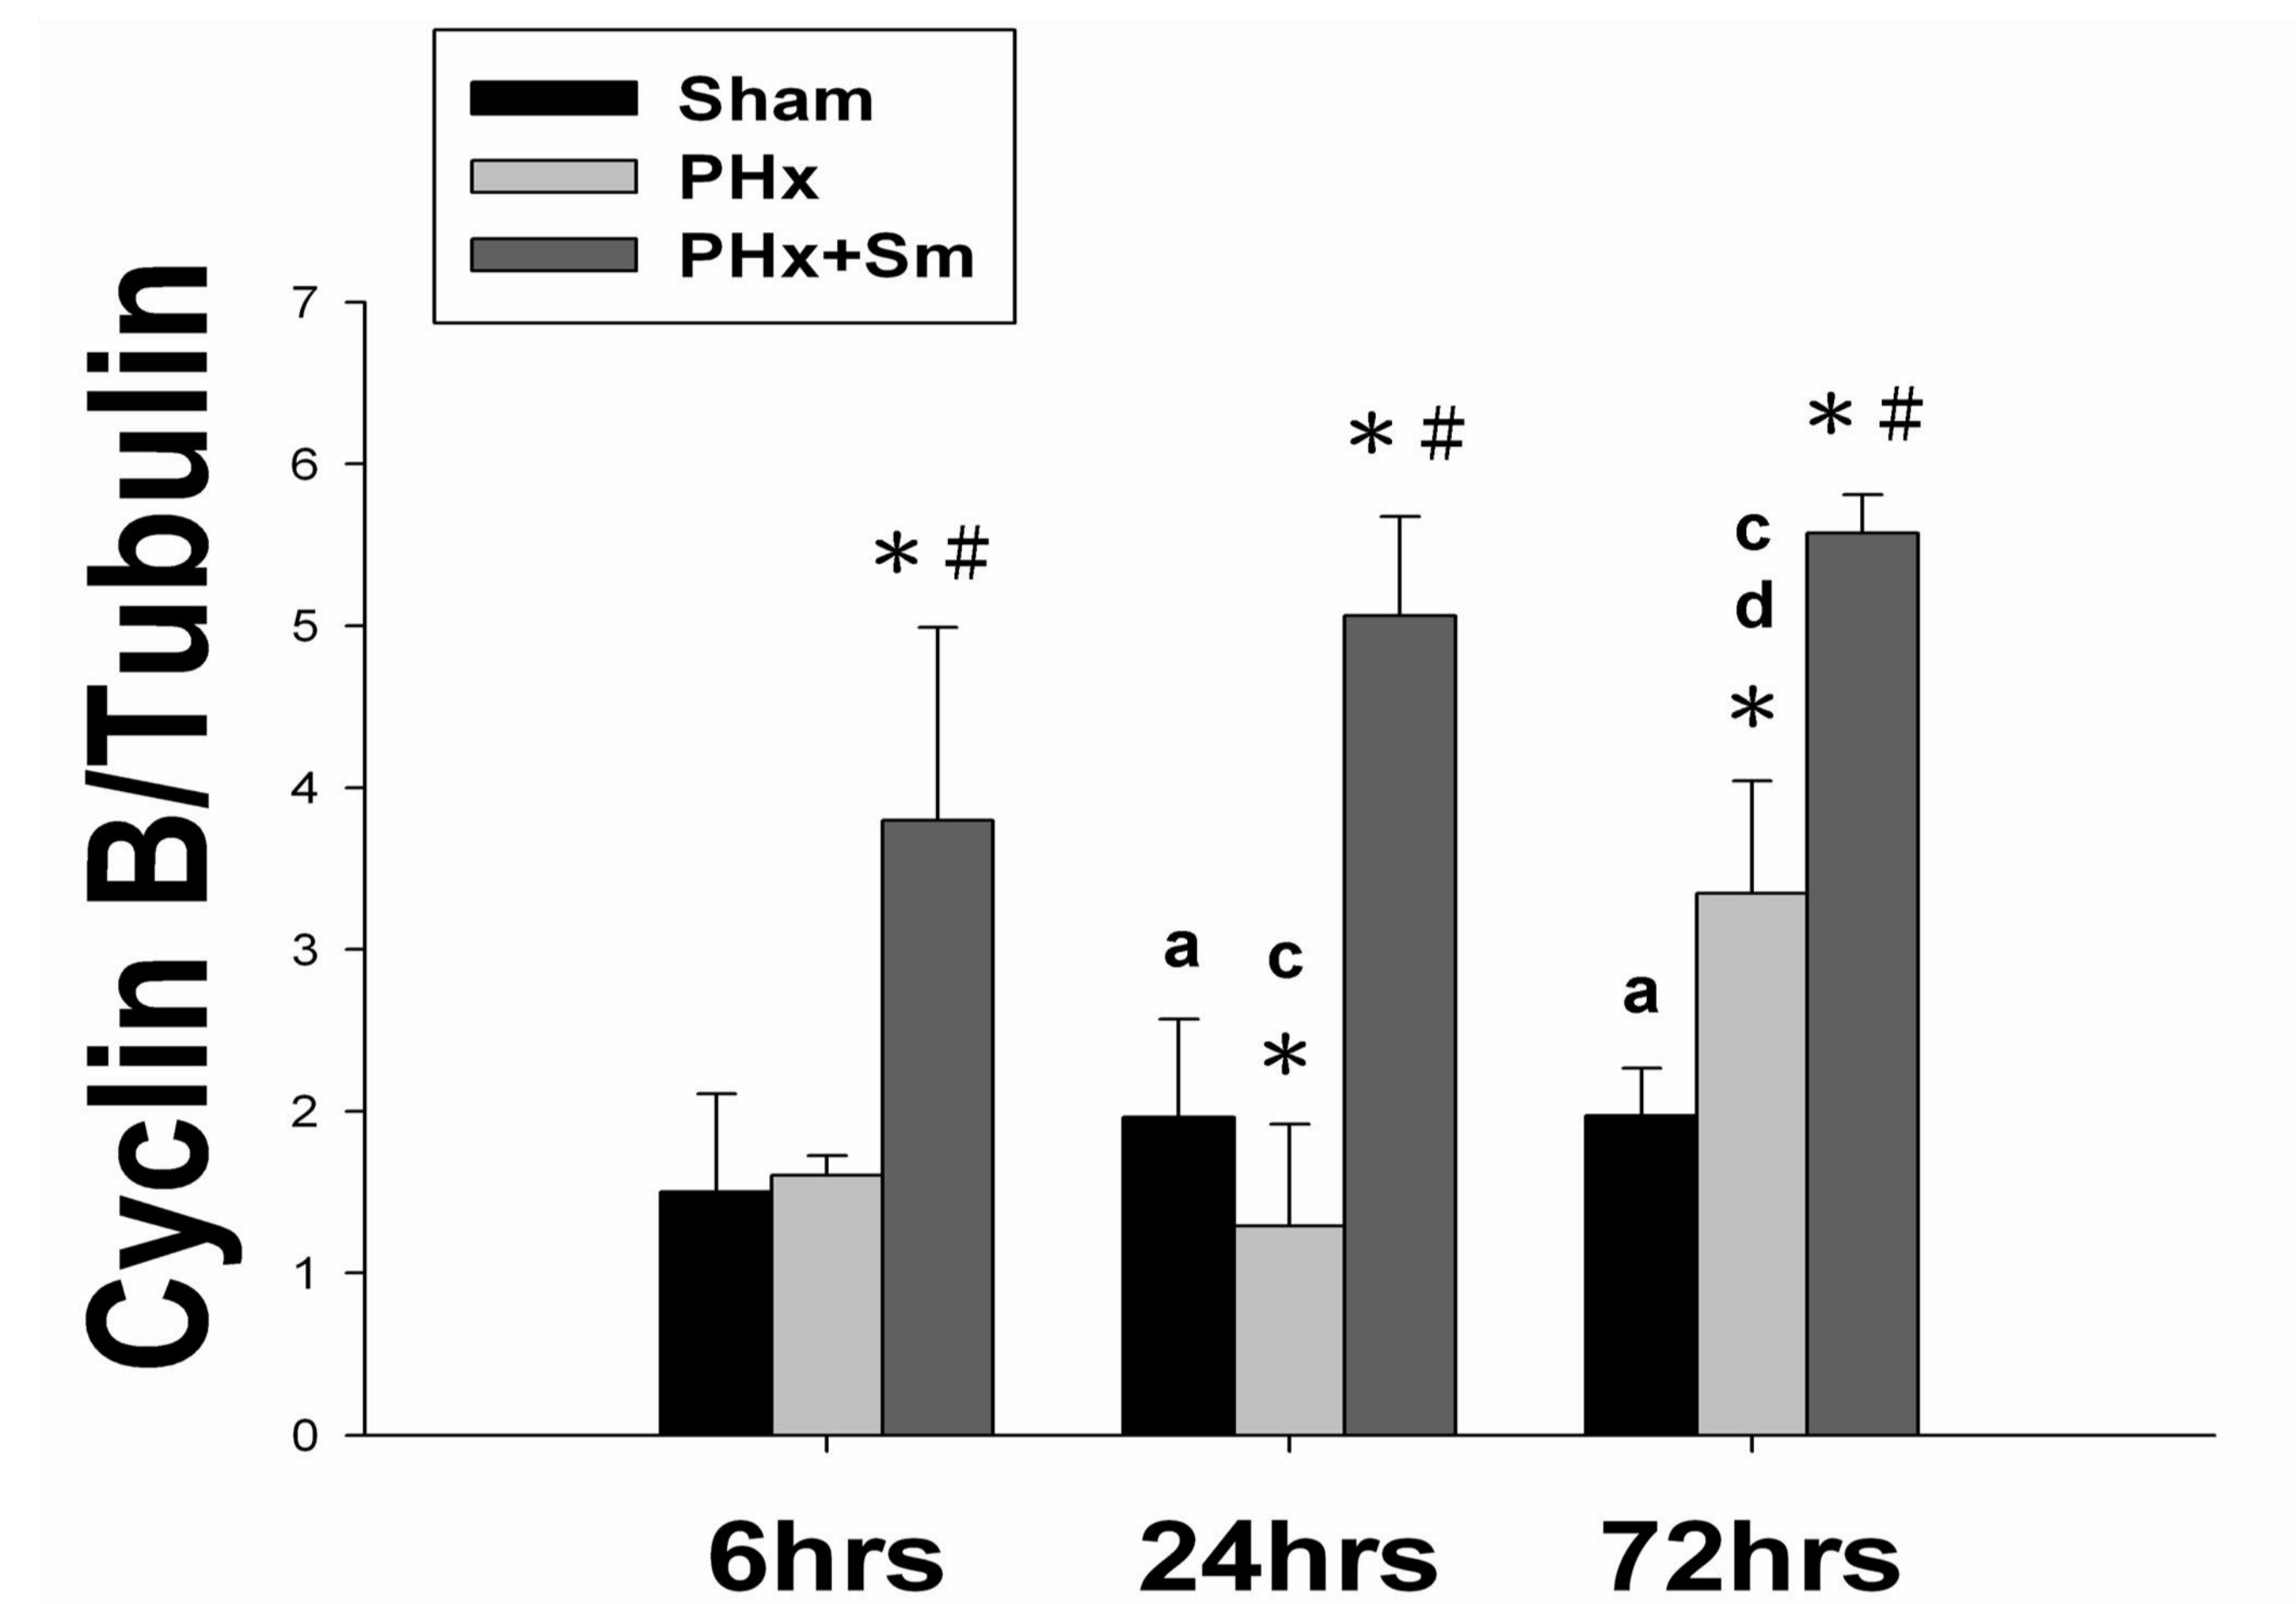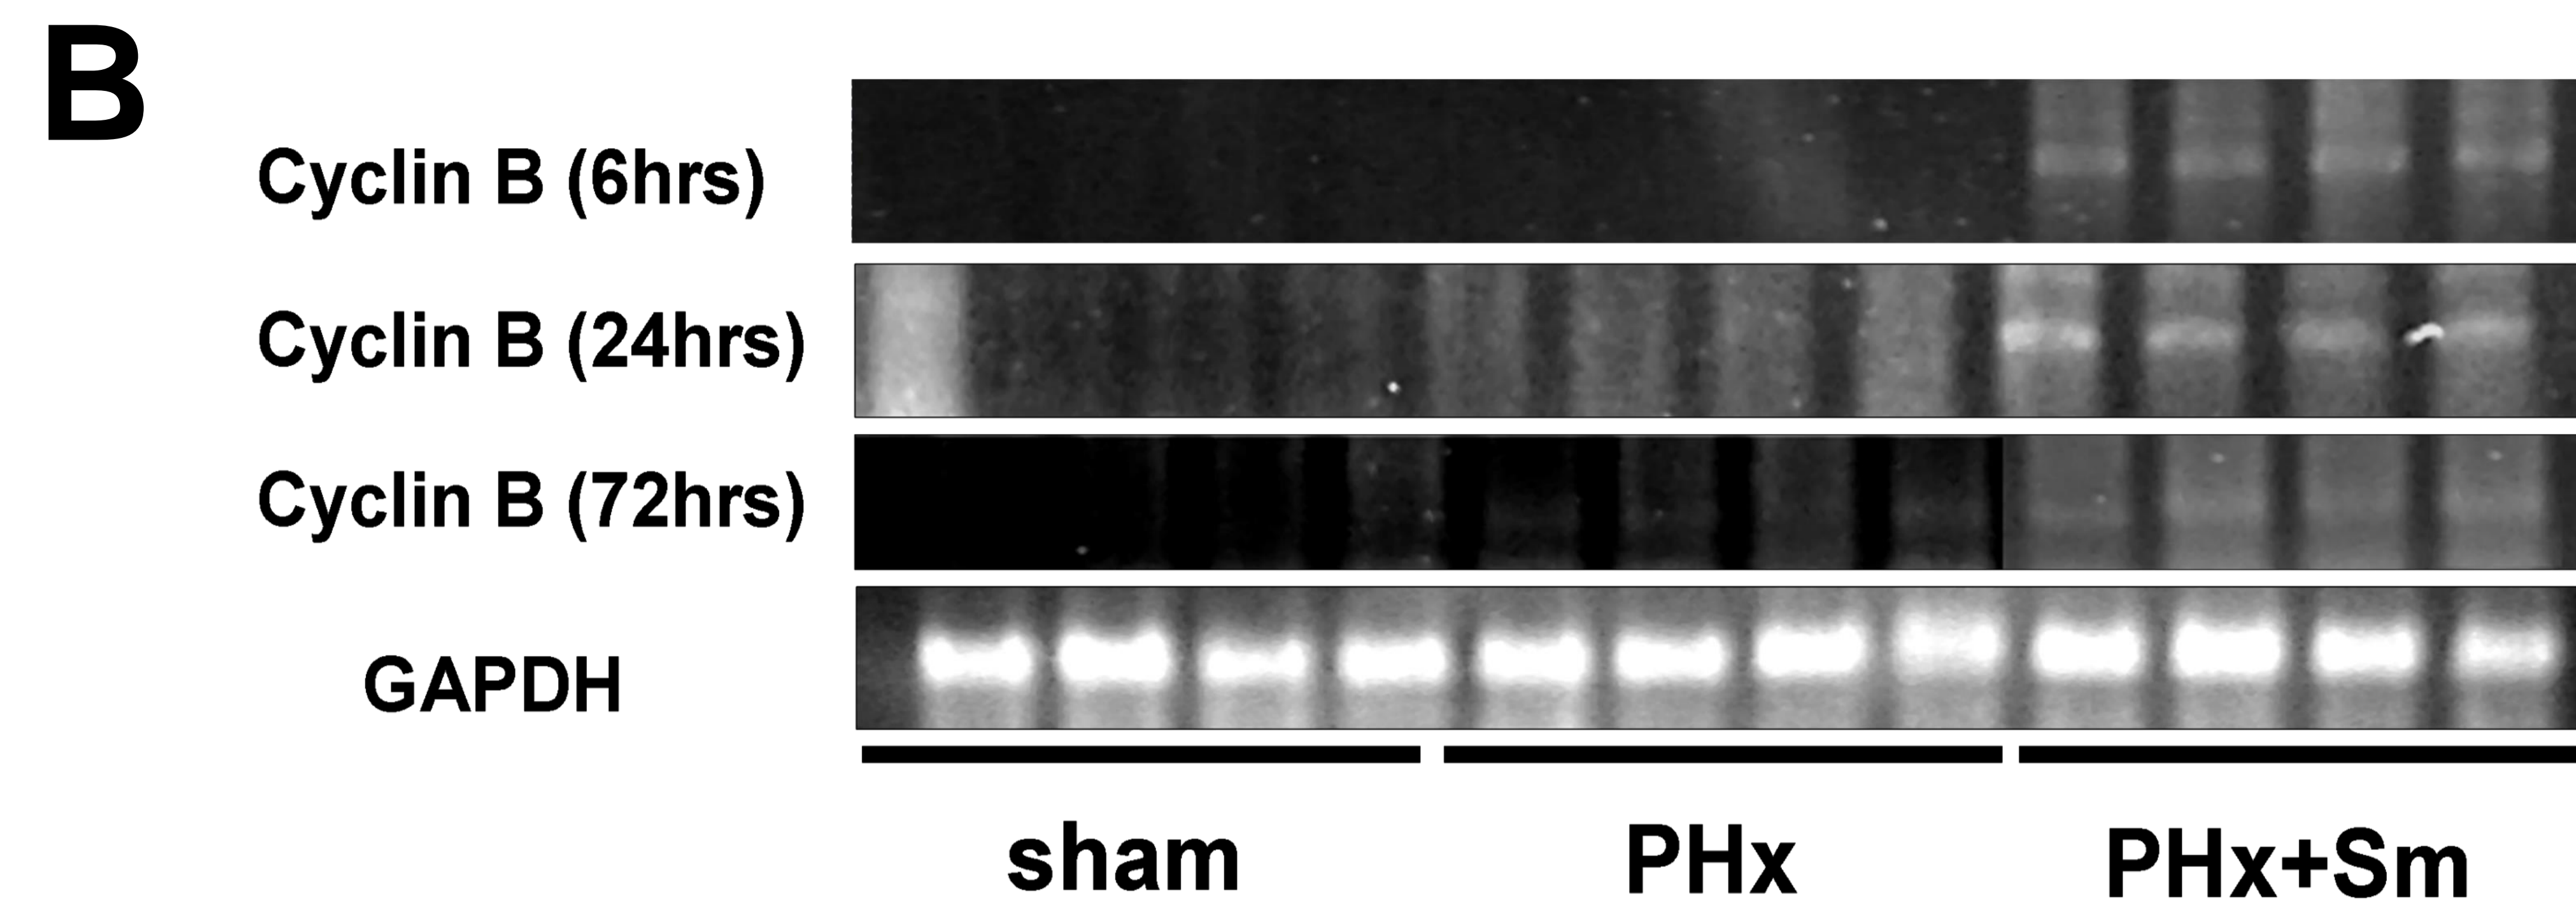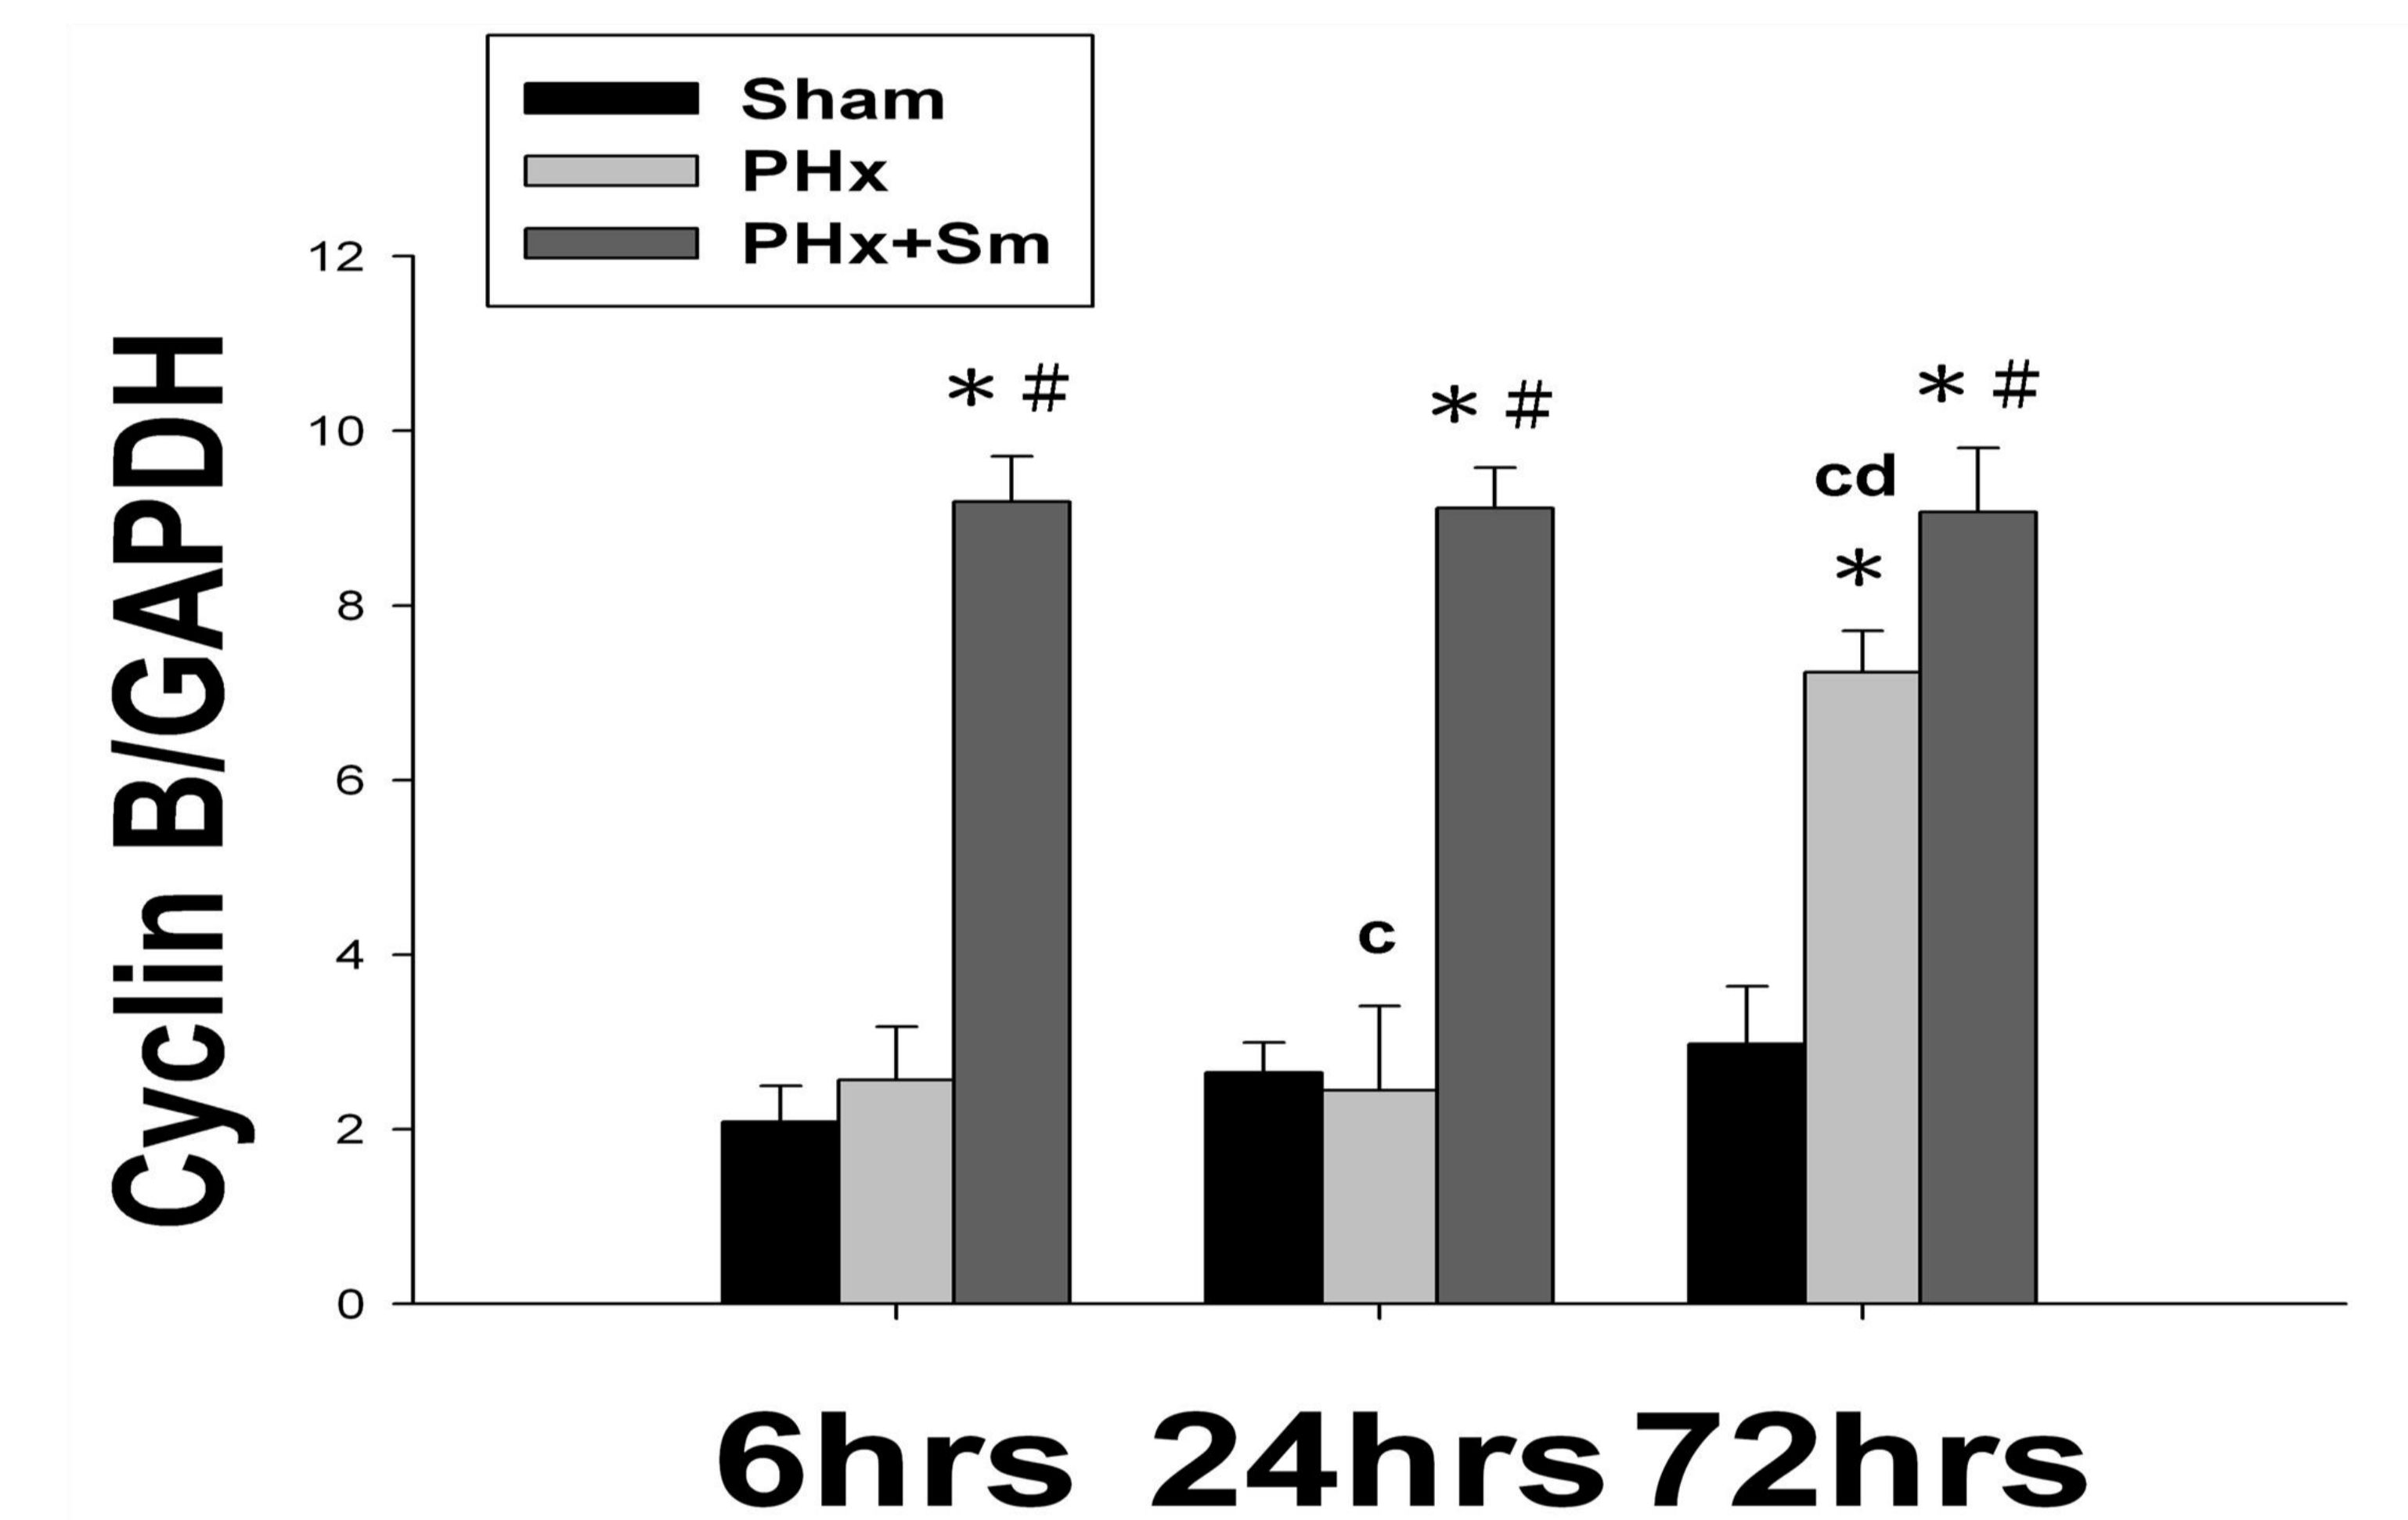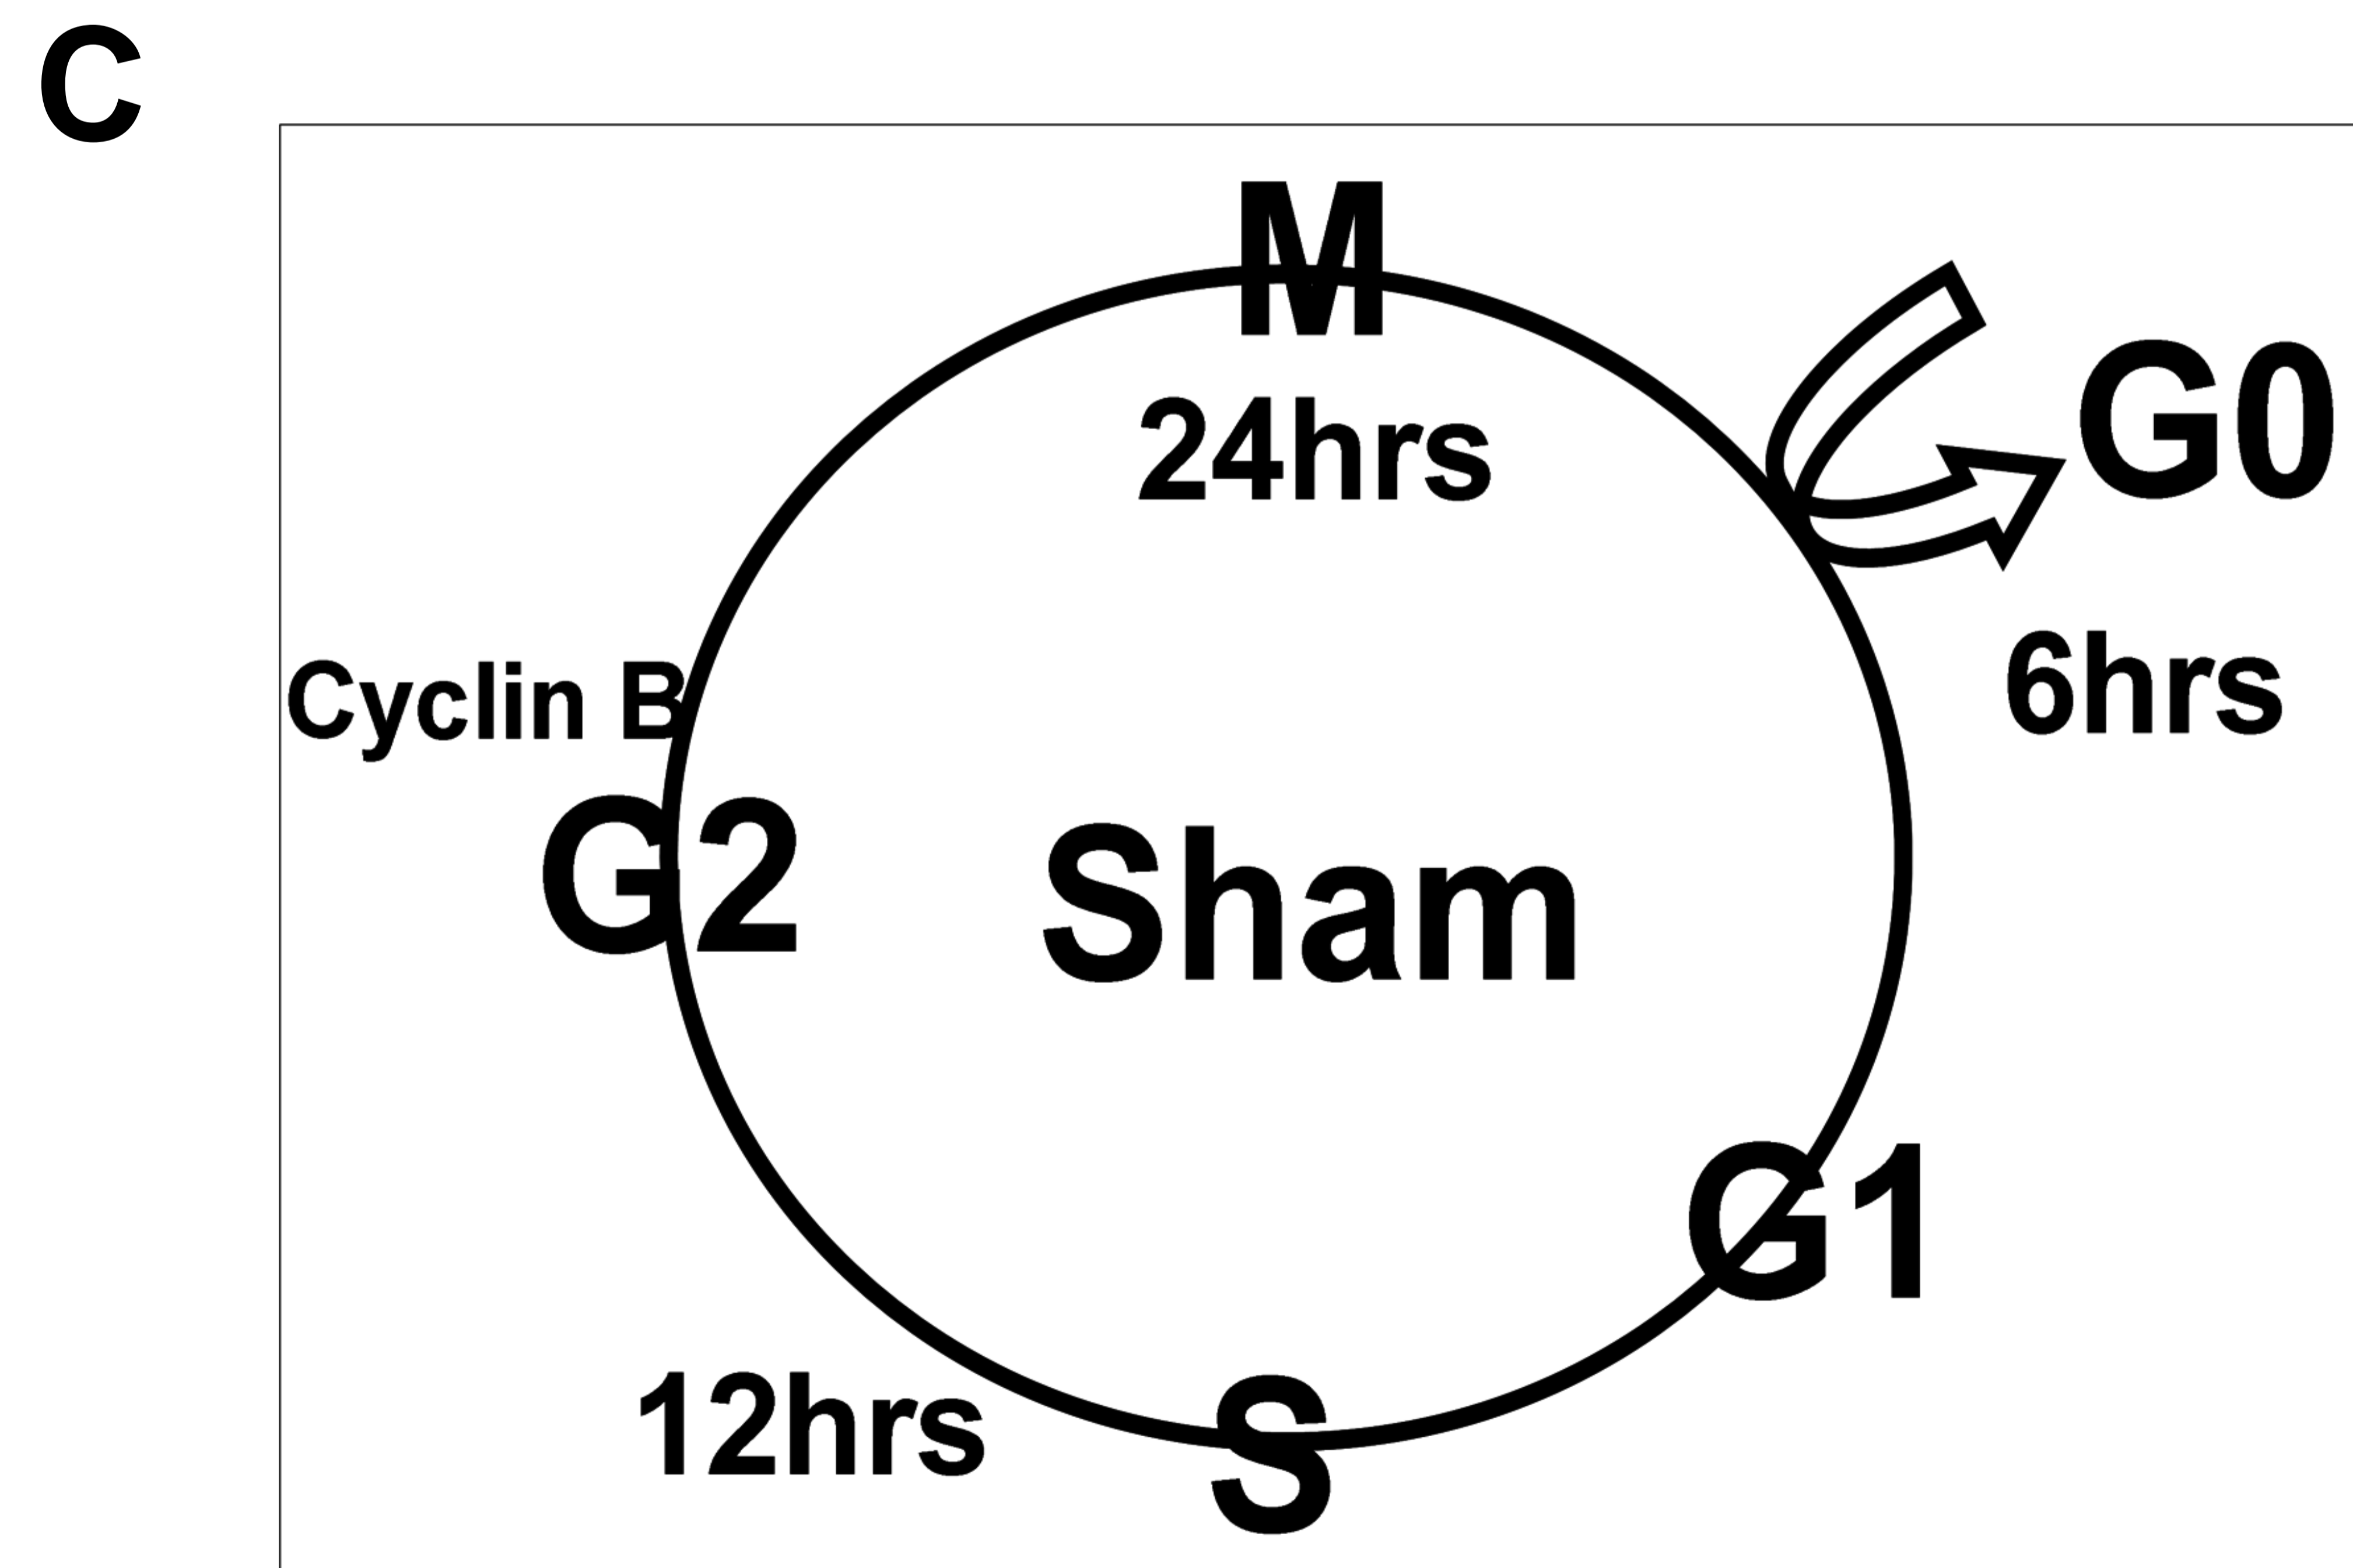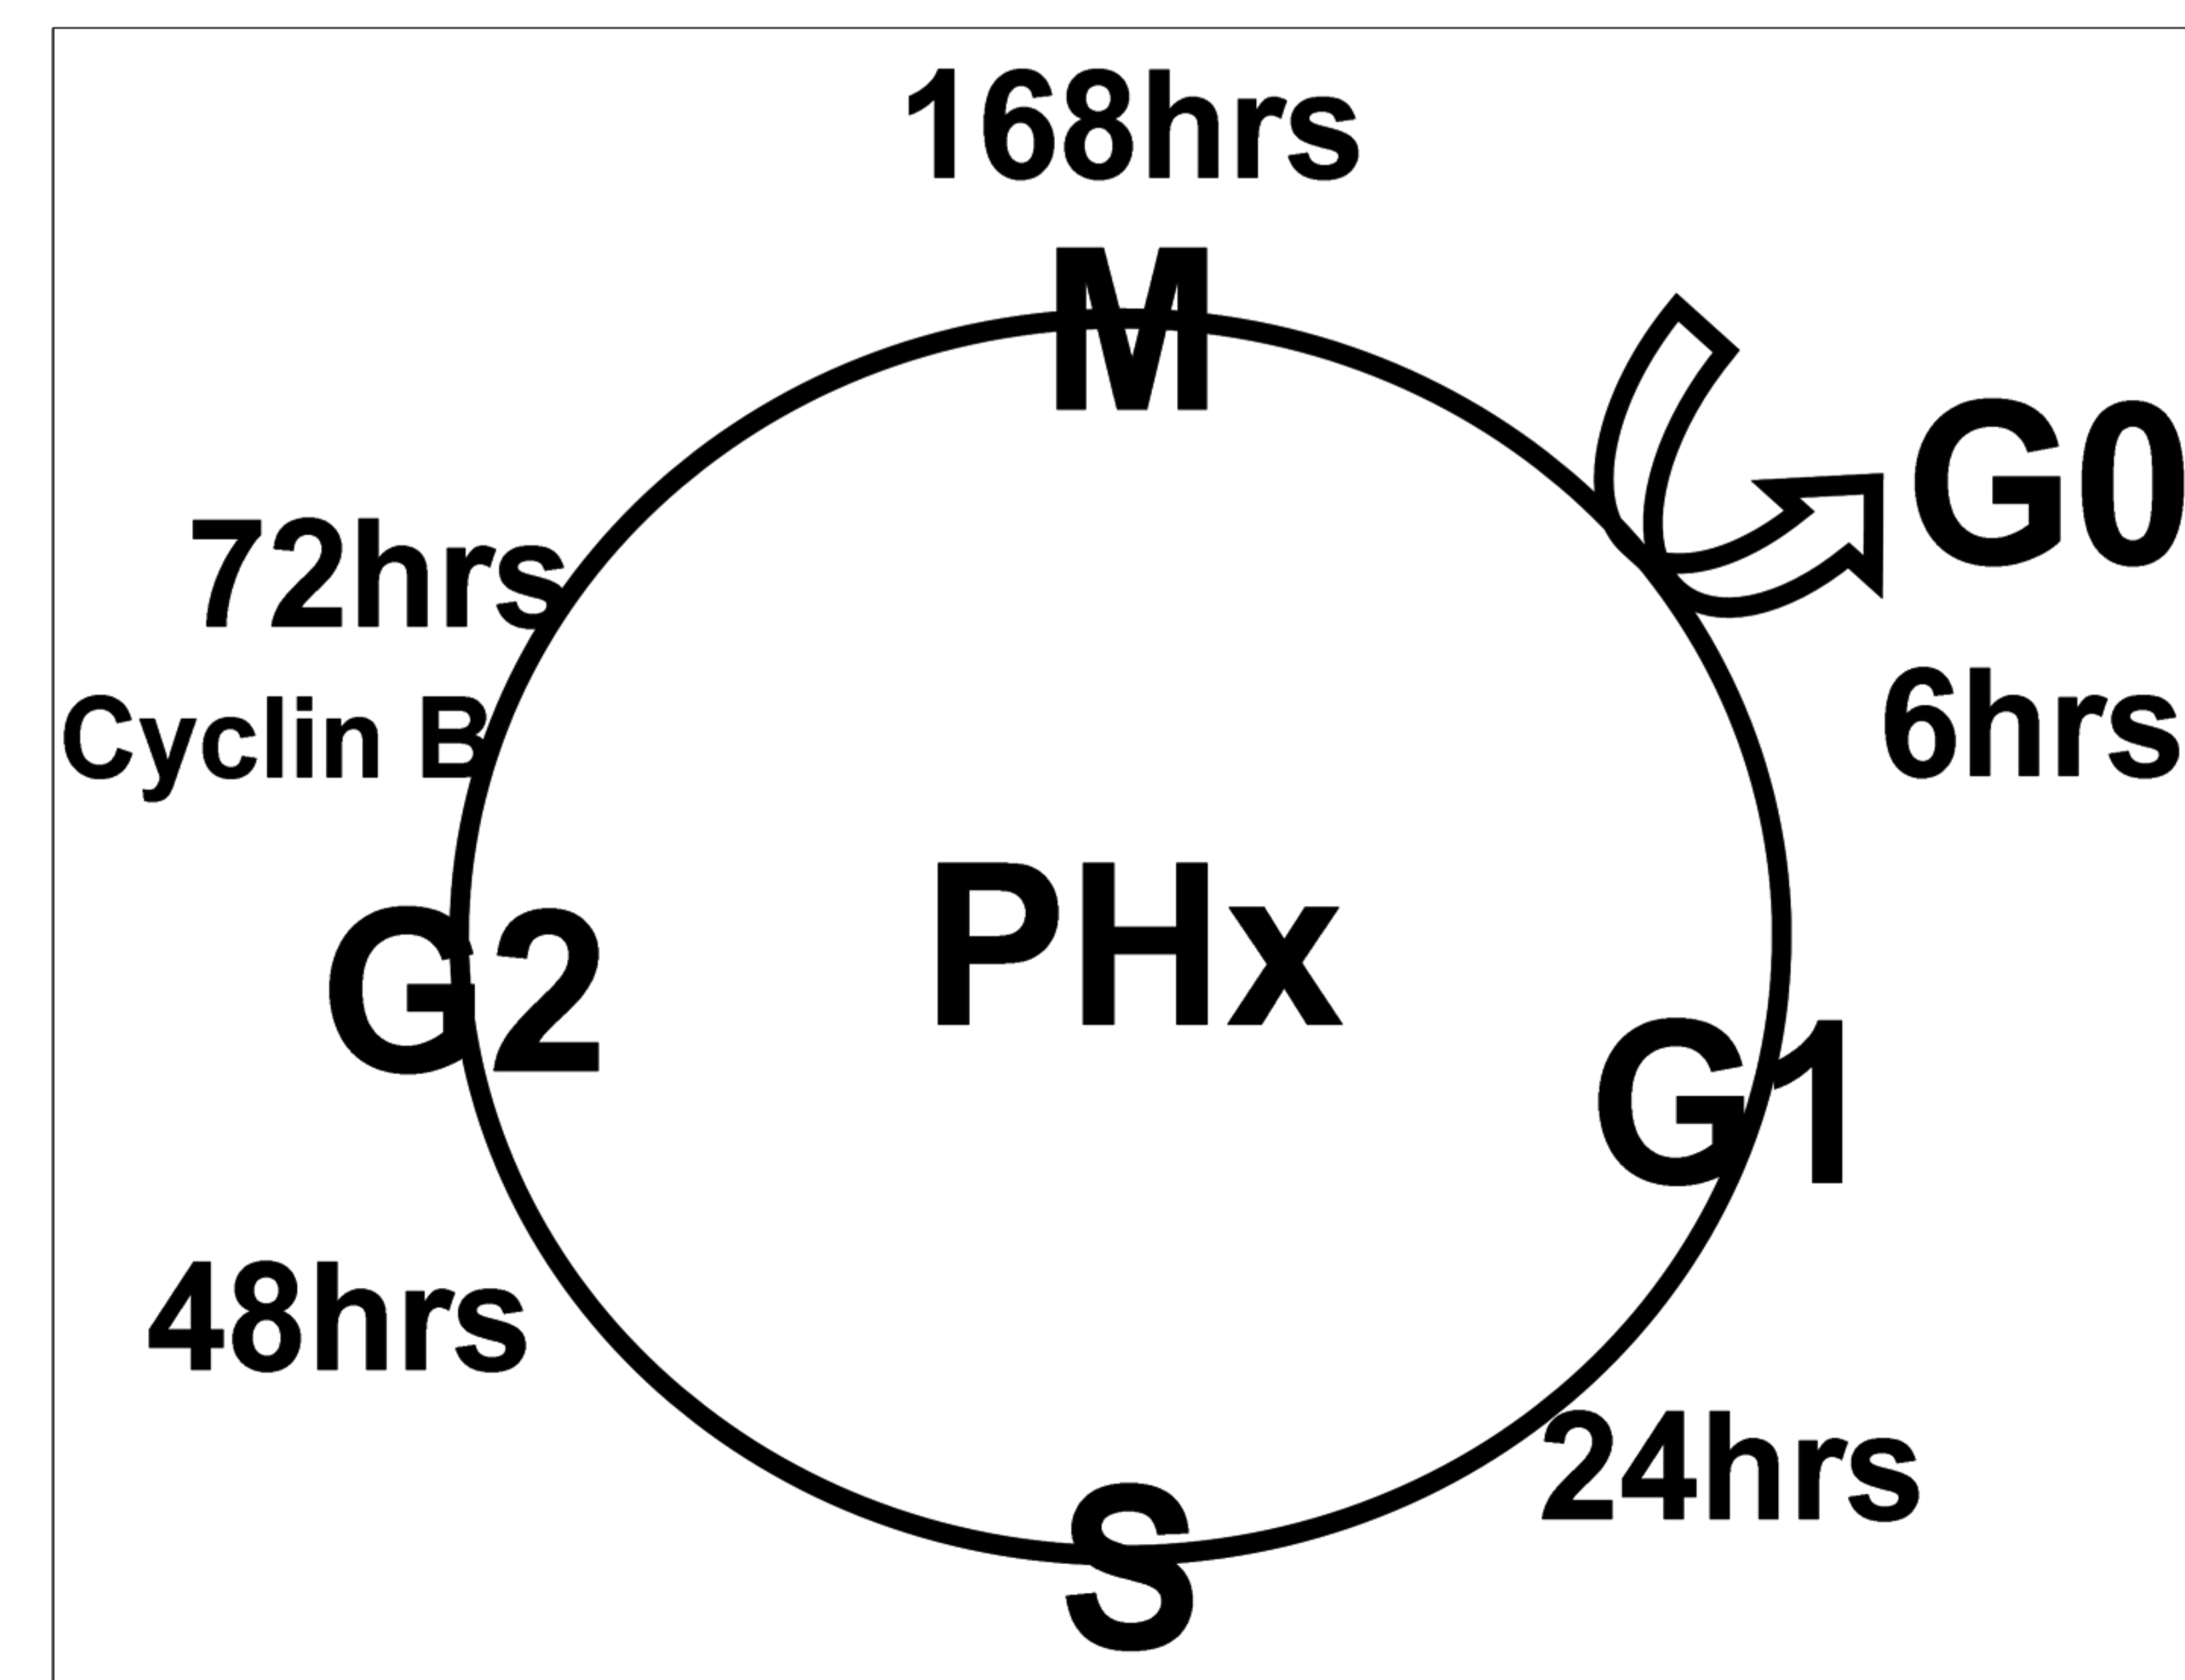

Supplement: f1 [file 2575273.f1.zip › Figure 3.pdf]
