# Supplementary material for: Retracted: Silymarin Accelerates Liver Regeneration after Partial Hepatectomy
Source: Hindawi journal article supplement (doi:10.1155/2017/2575273), 2017-01-01

**HGF 6hrs PHx Protein expression**

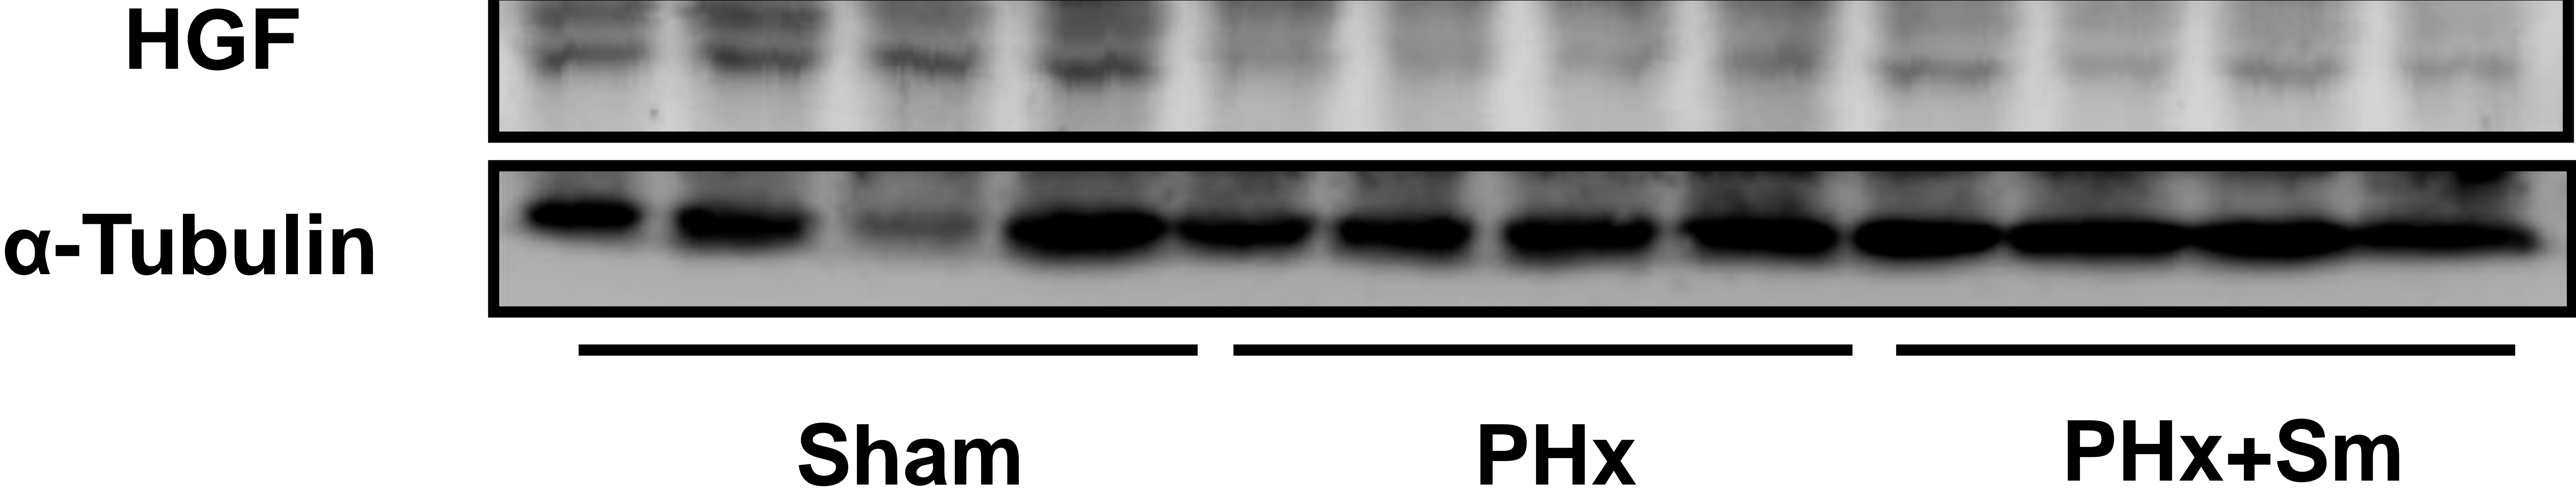

**HGF 6hrs PHx mRNA expression**

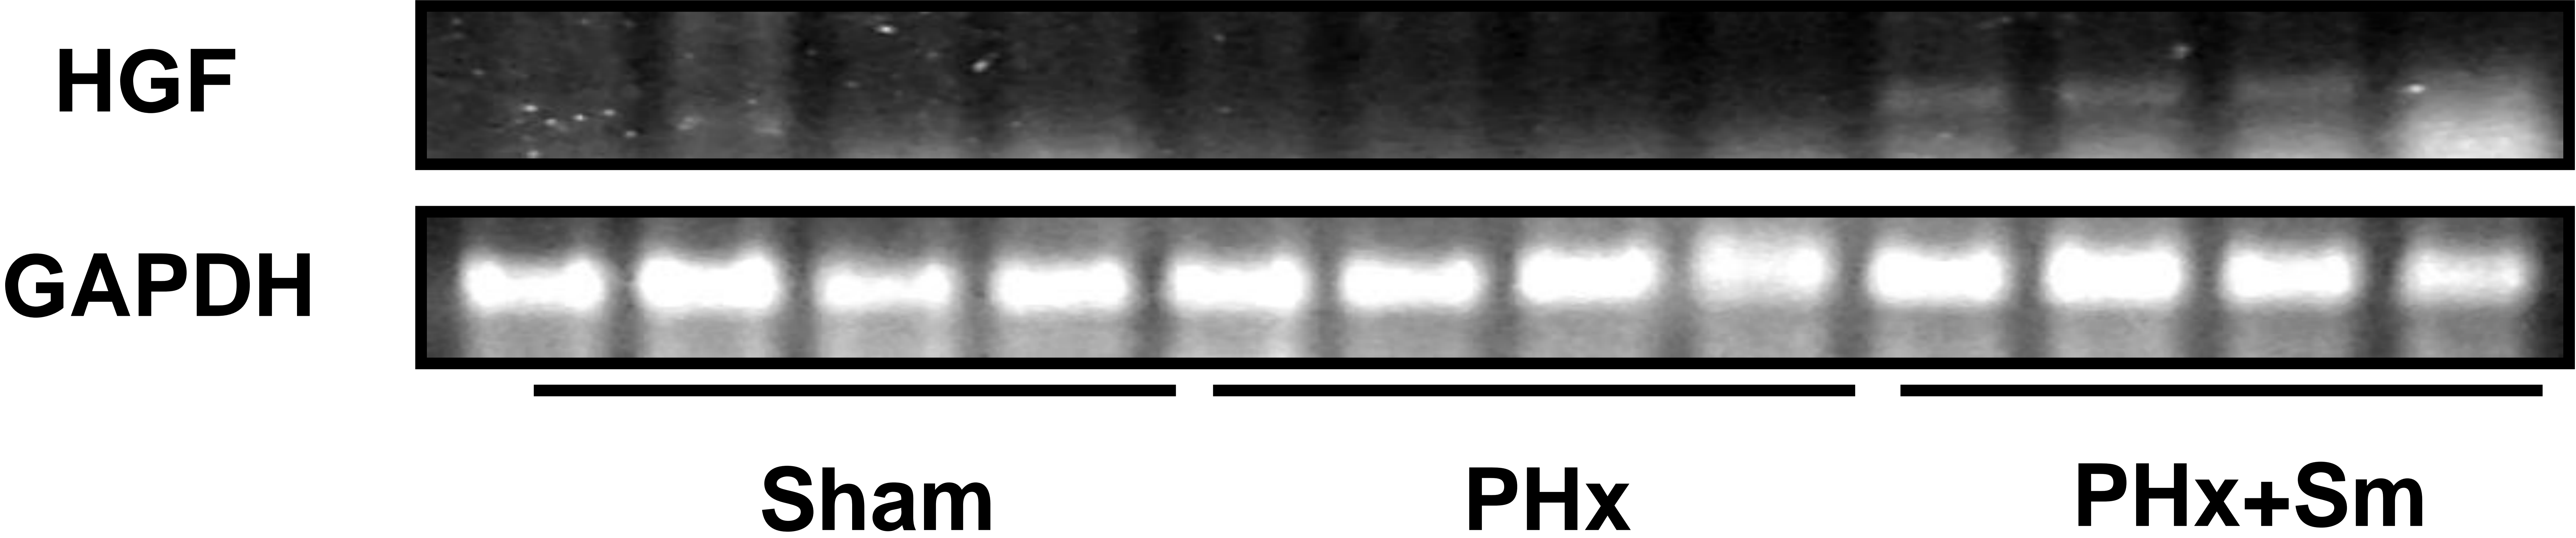

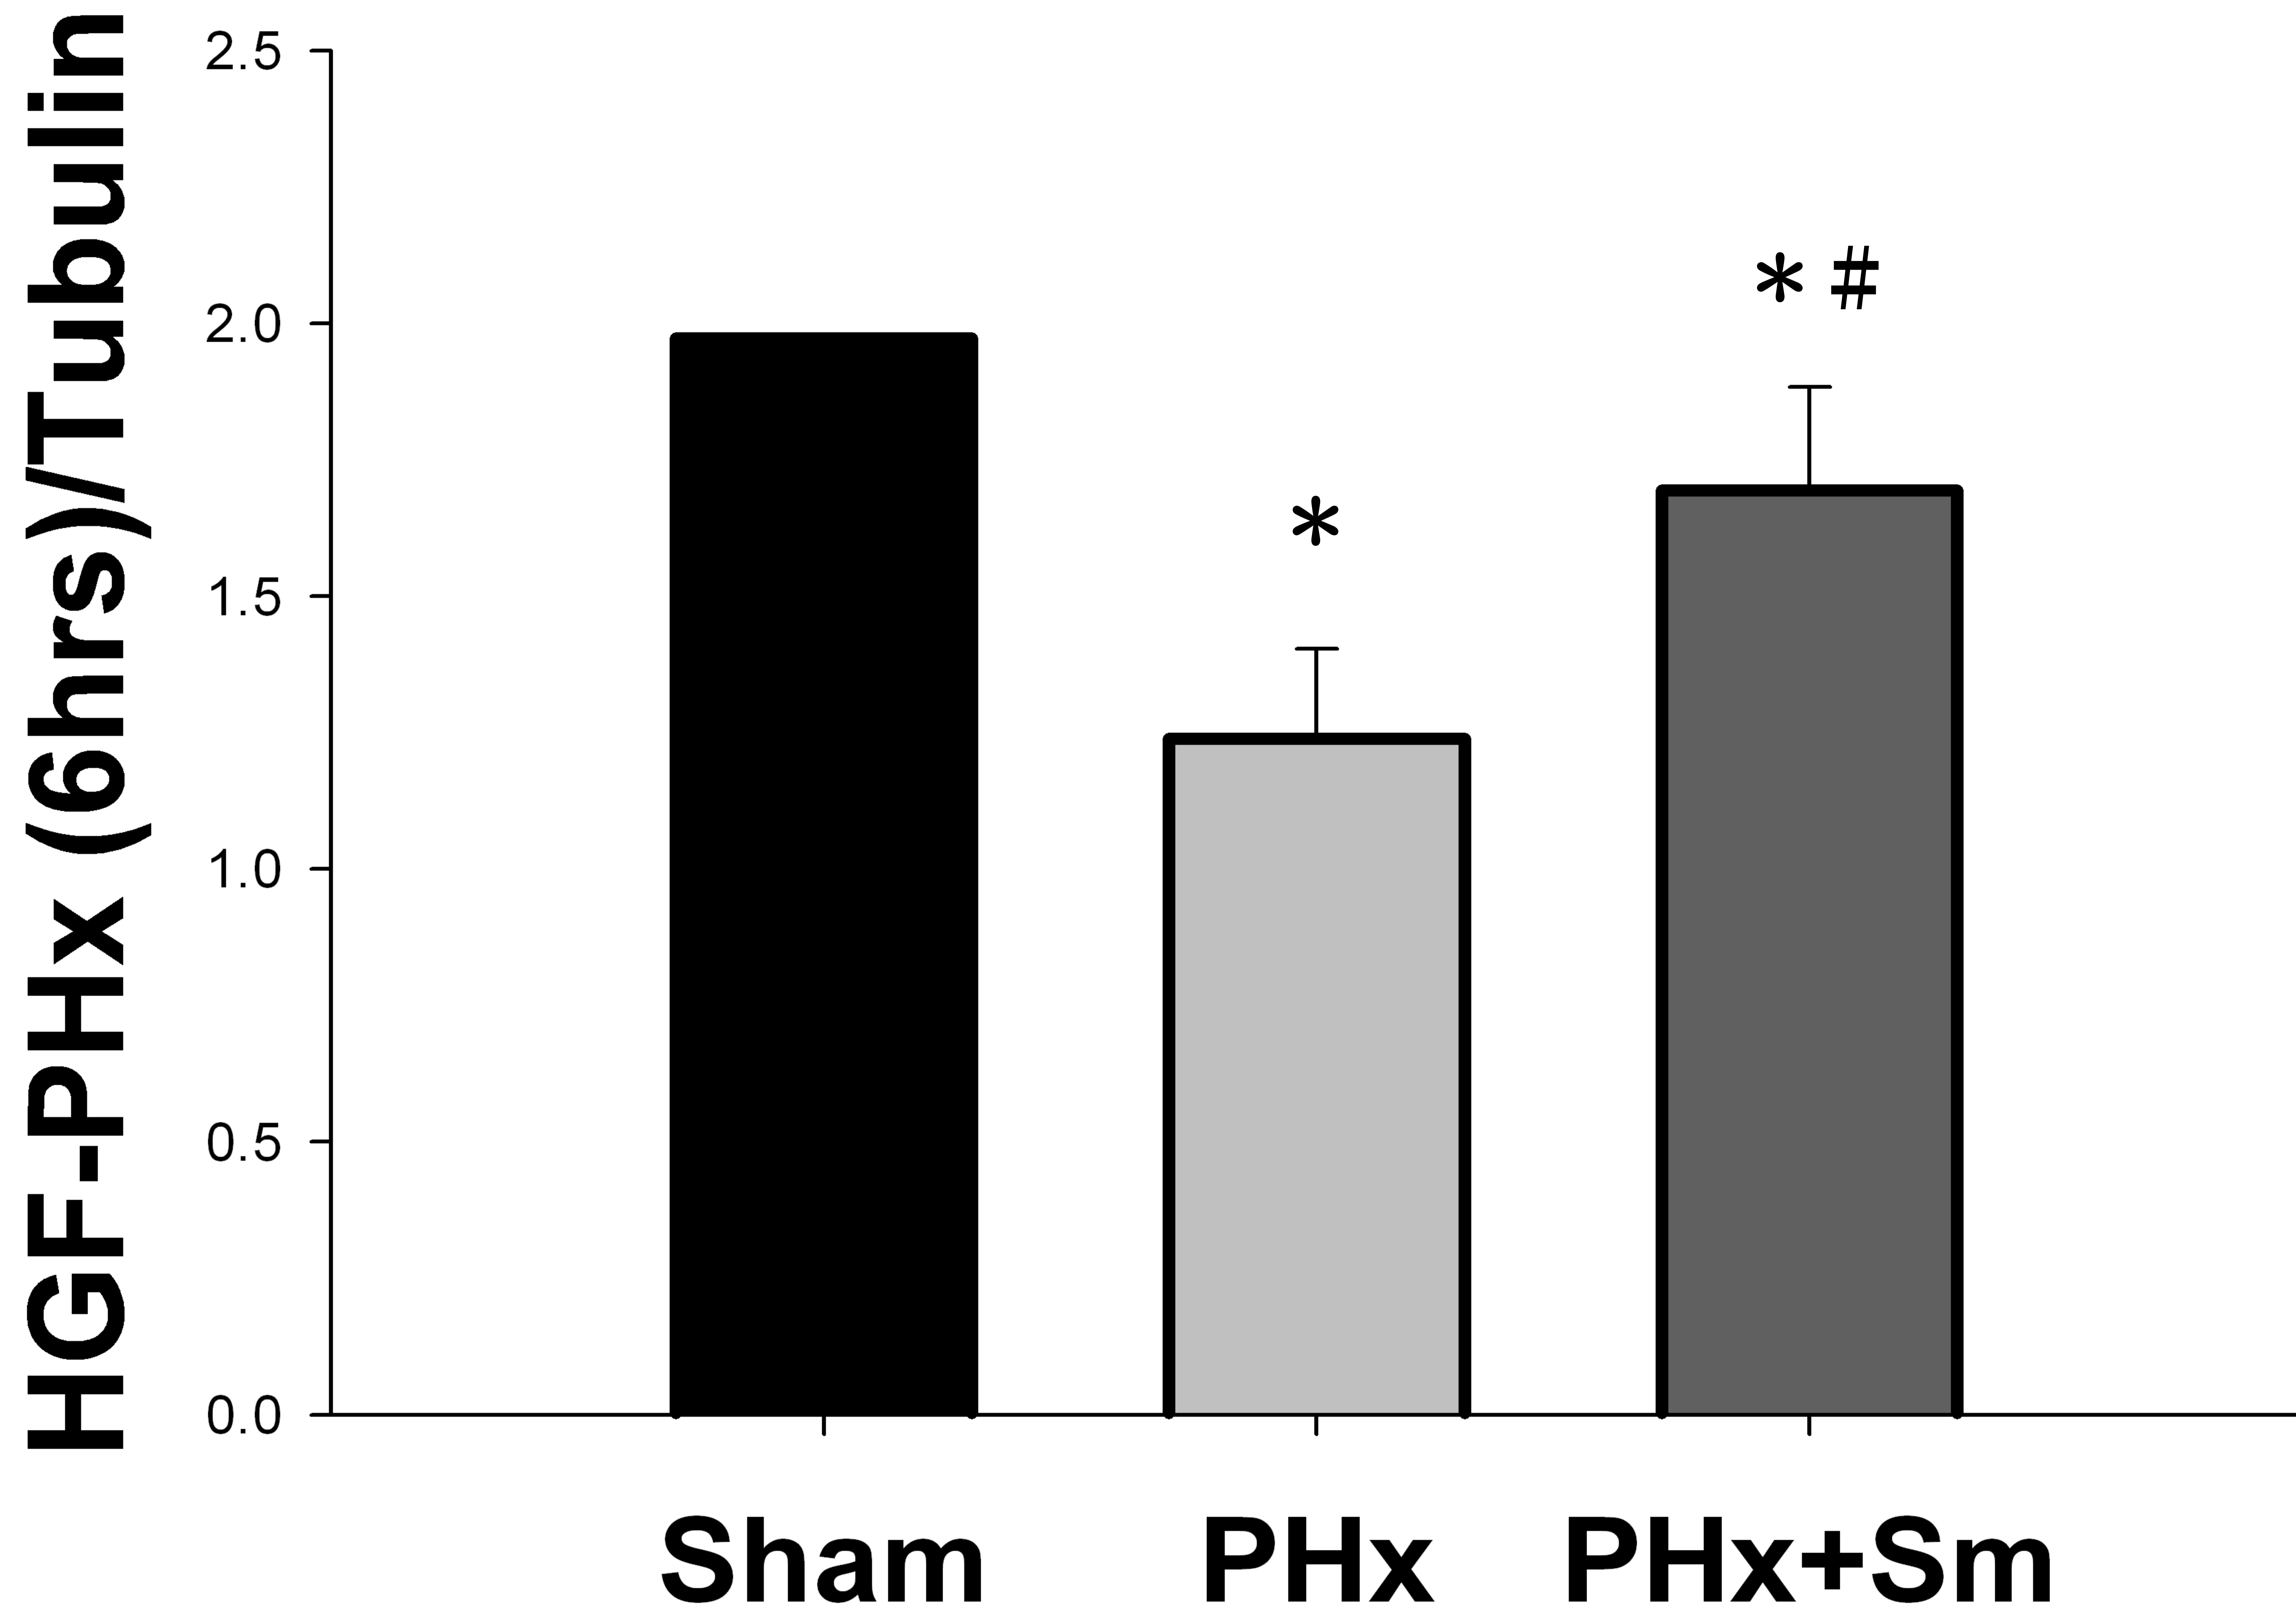

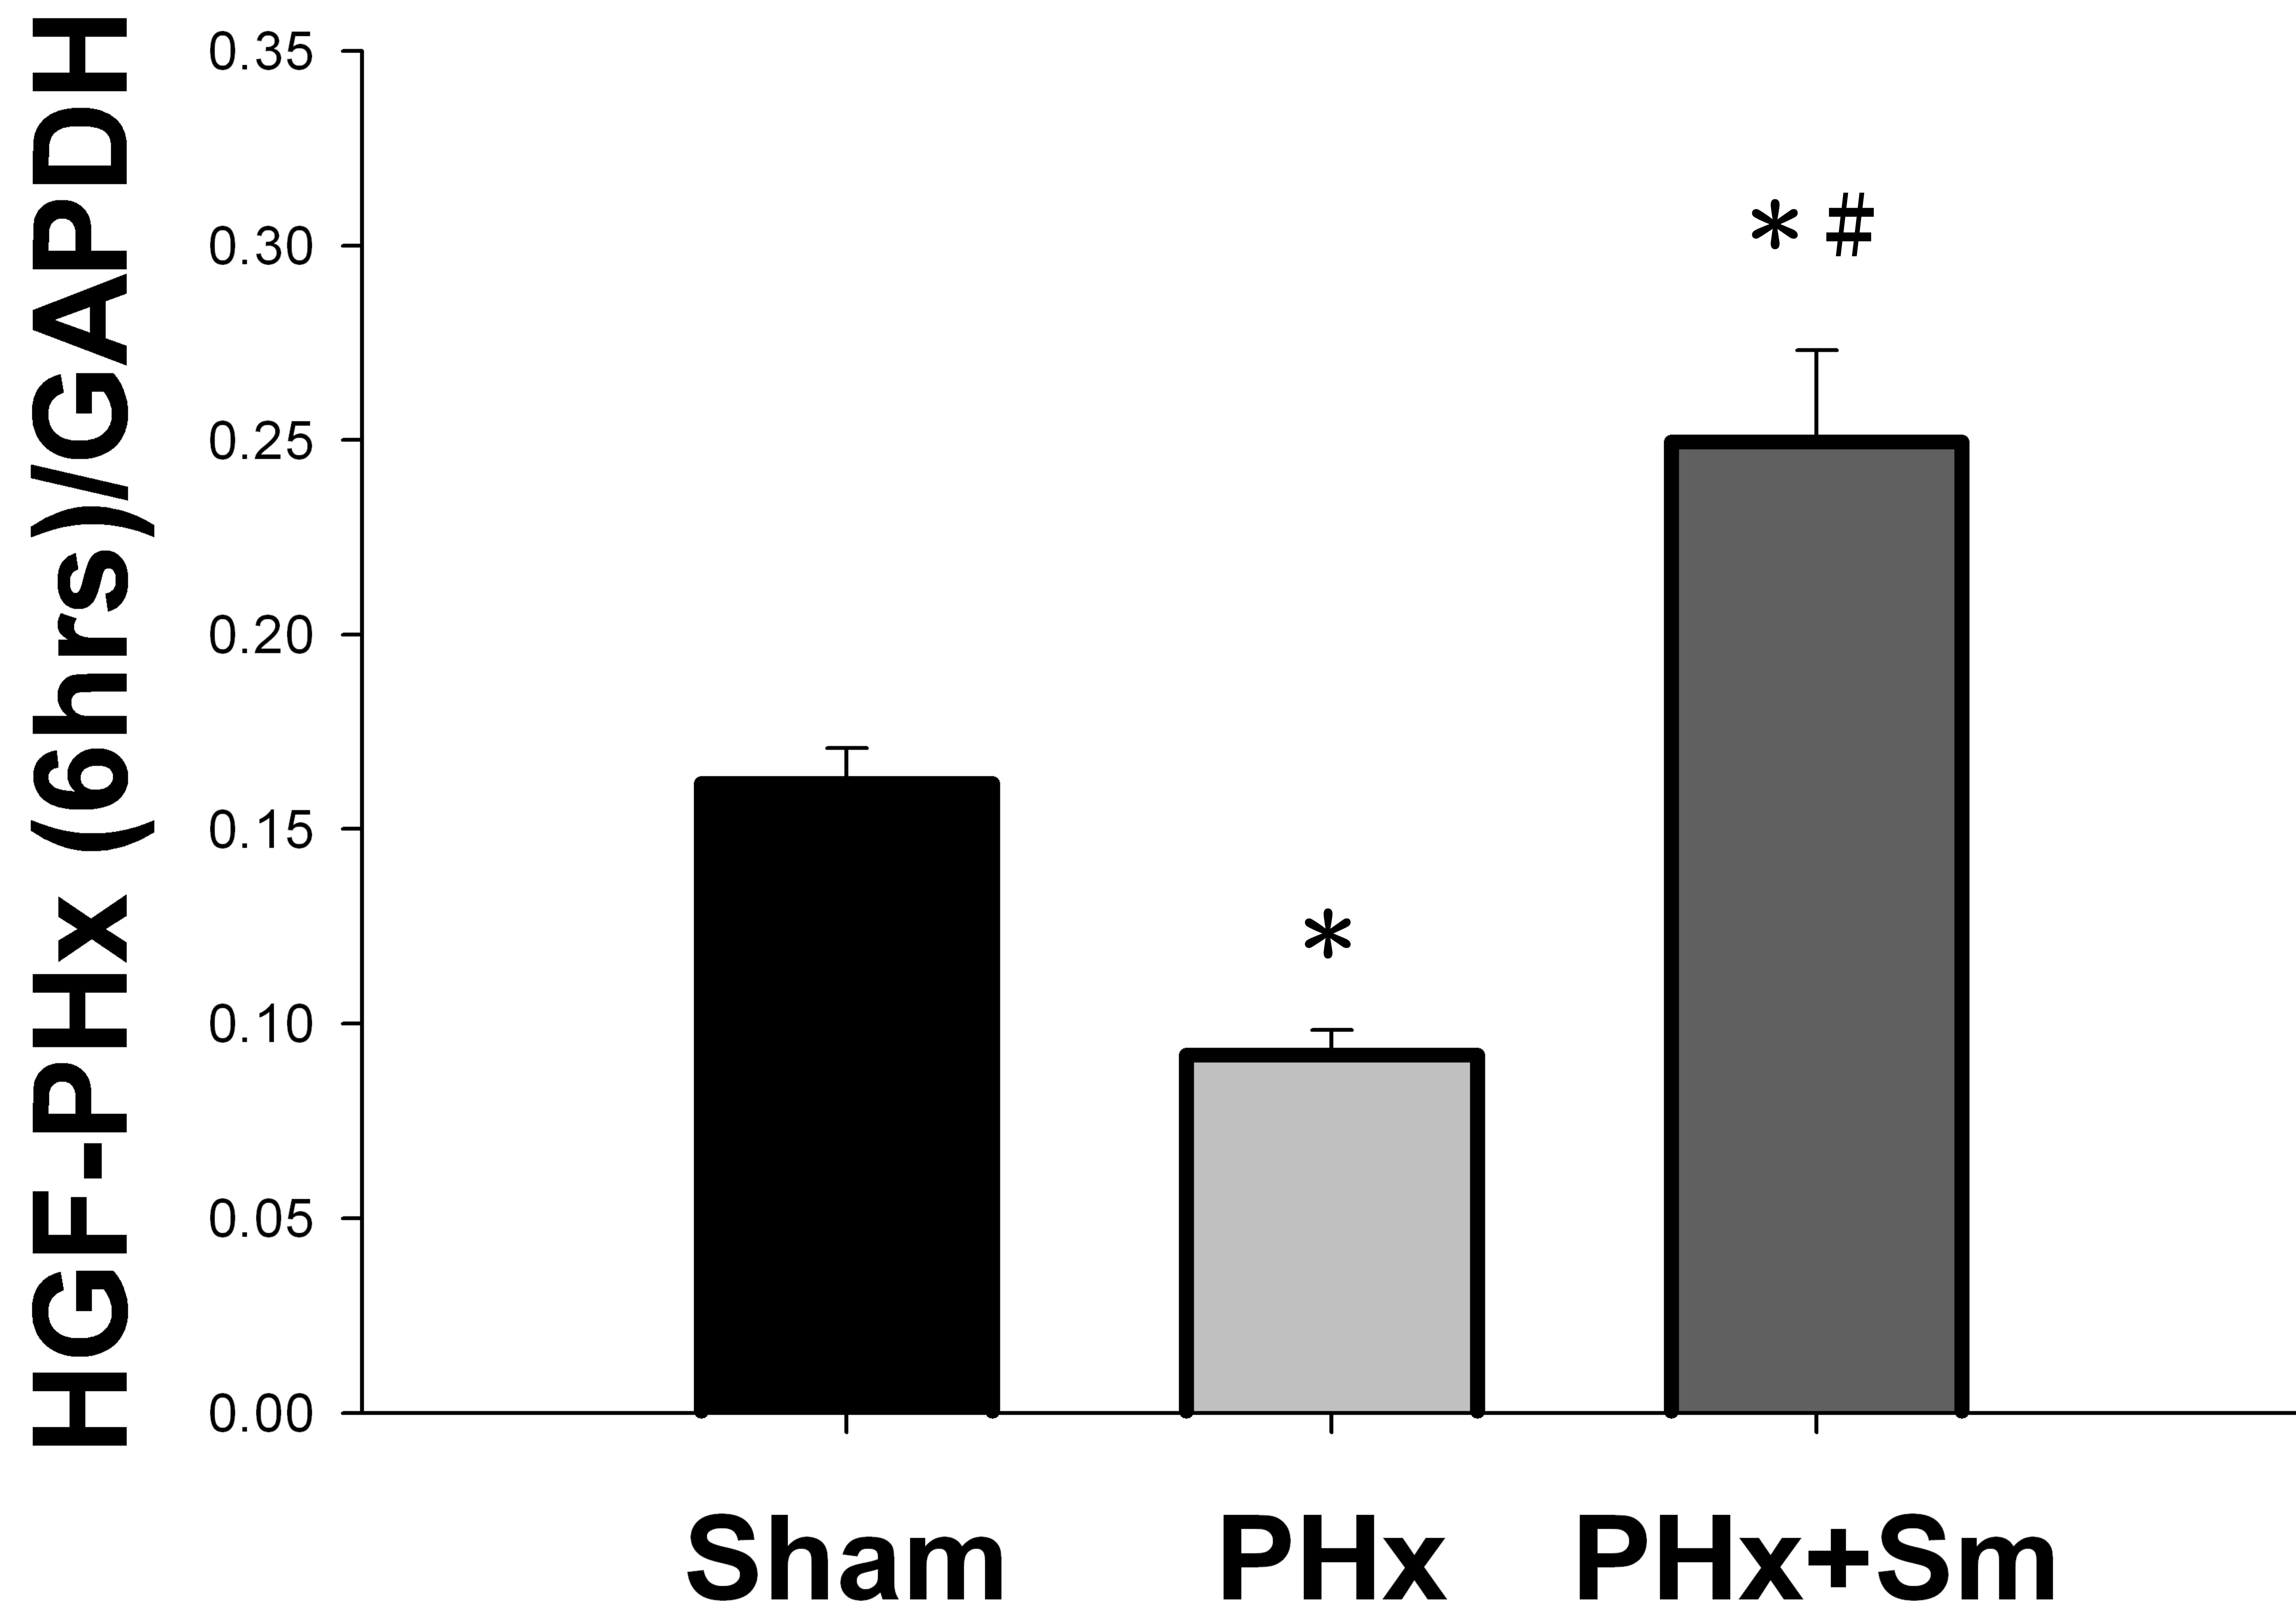

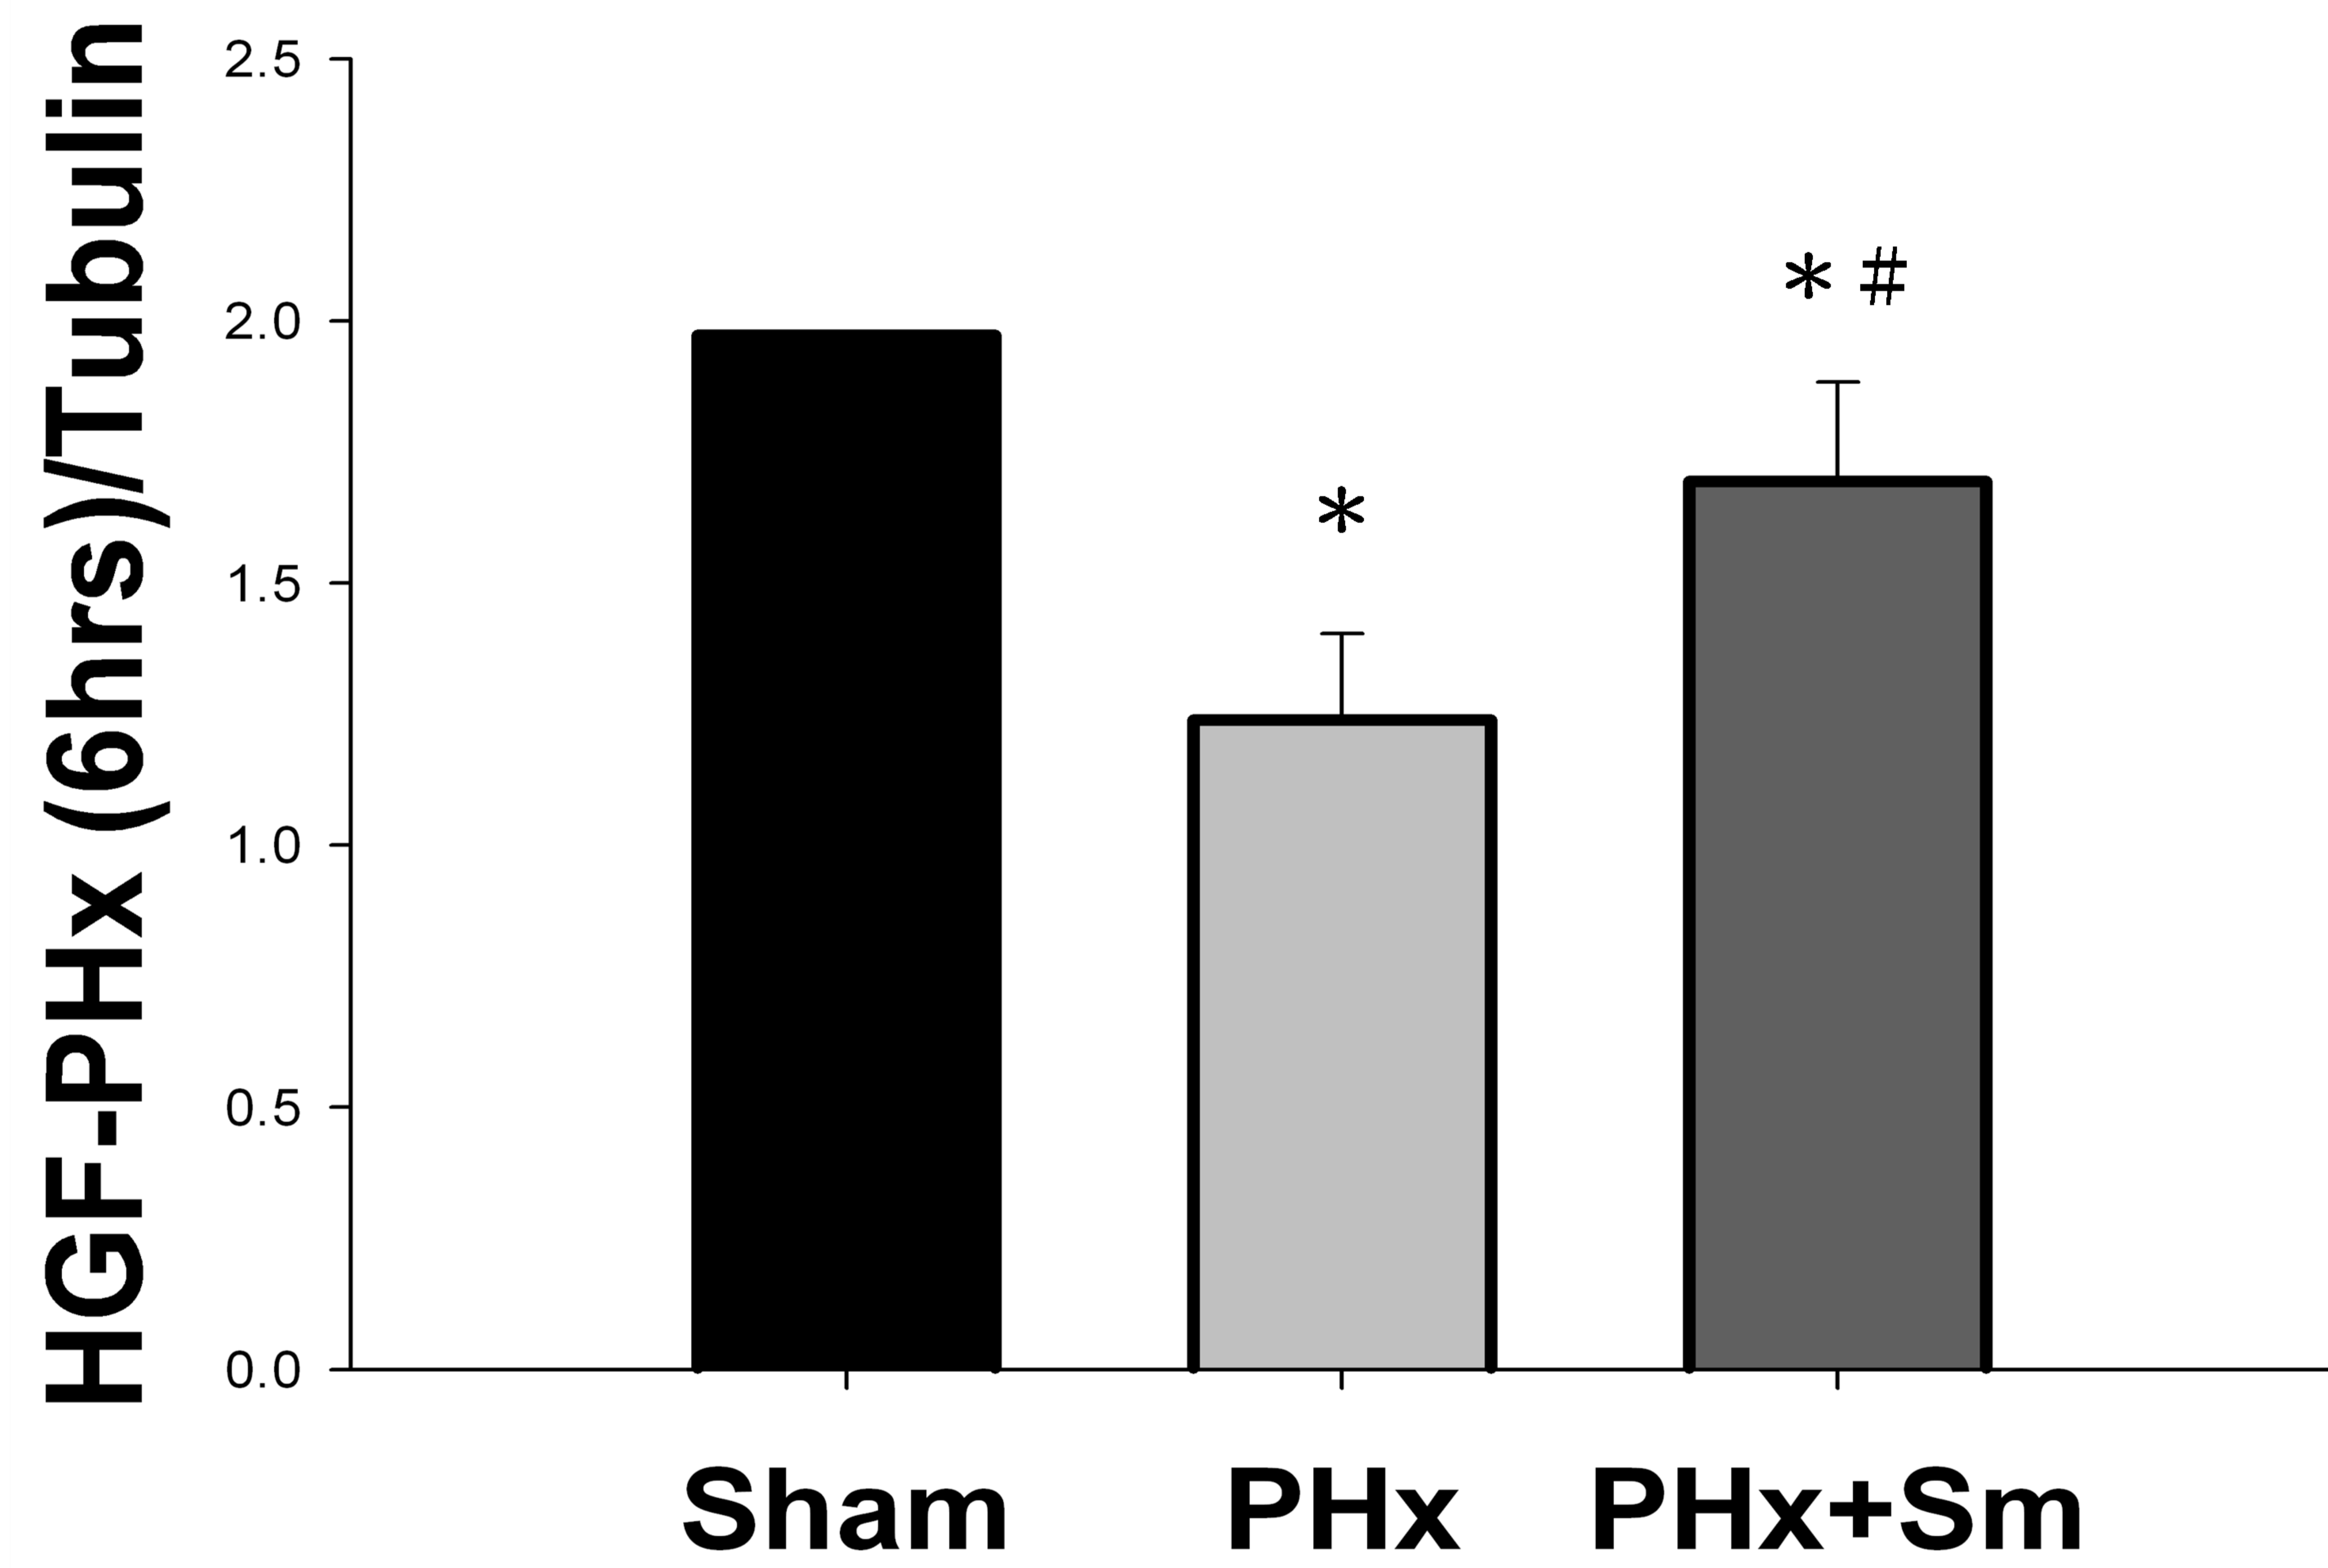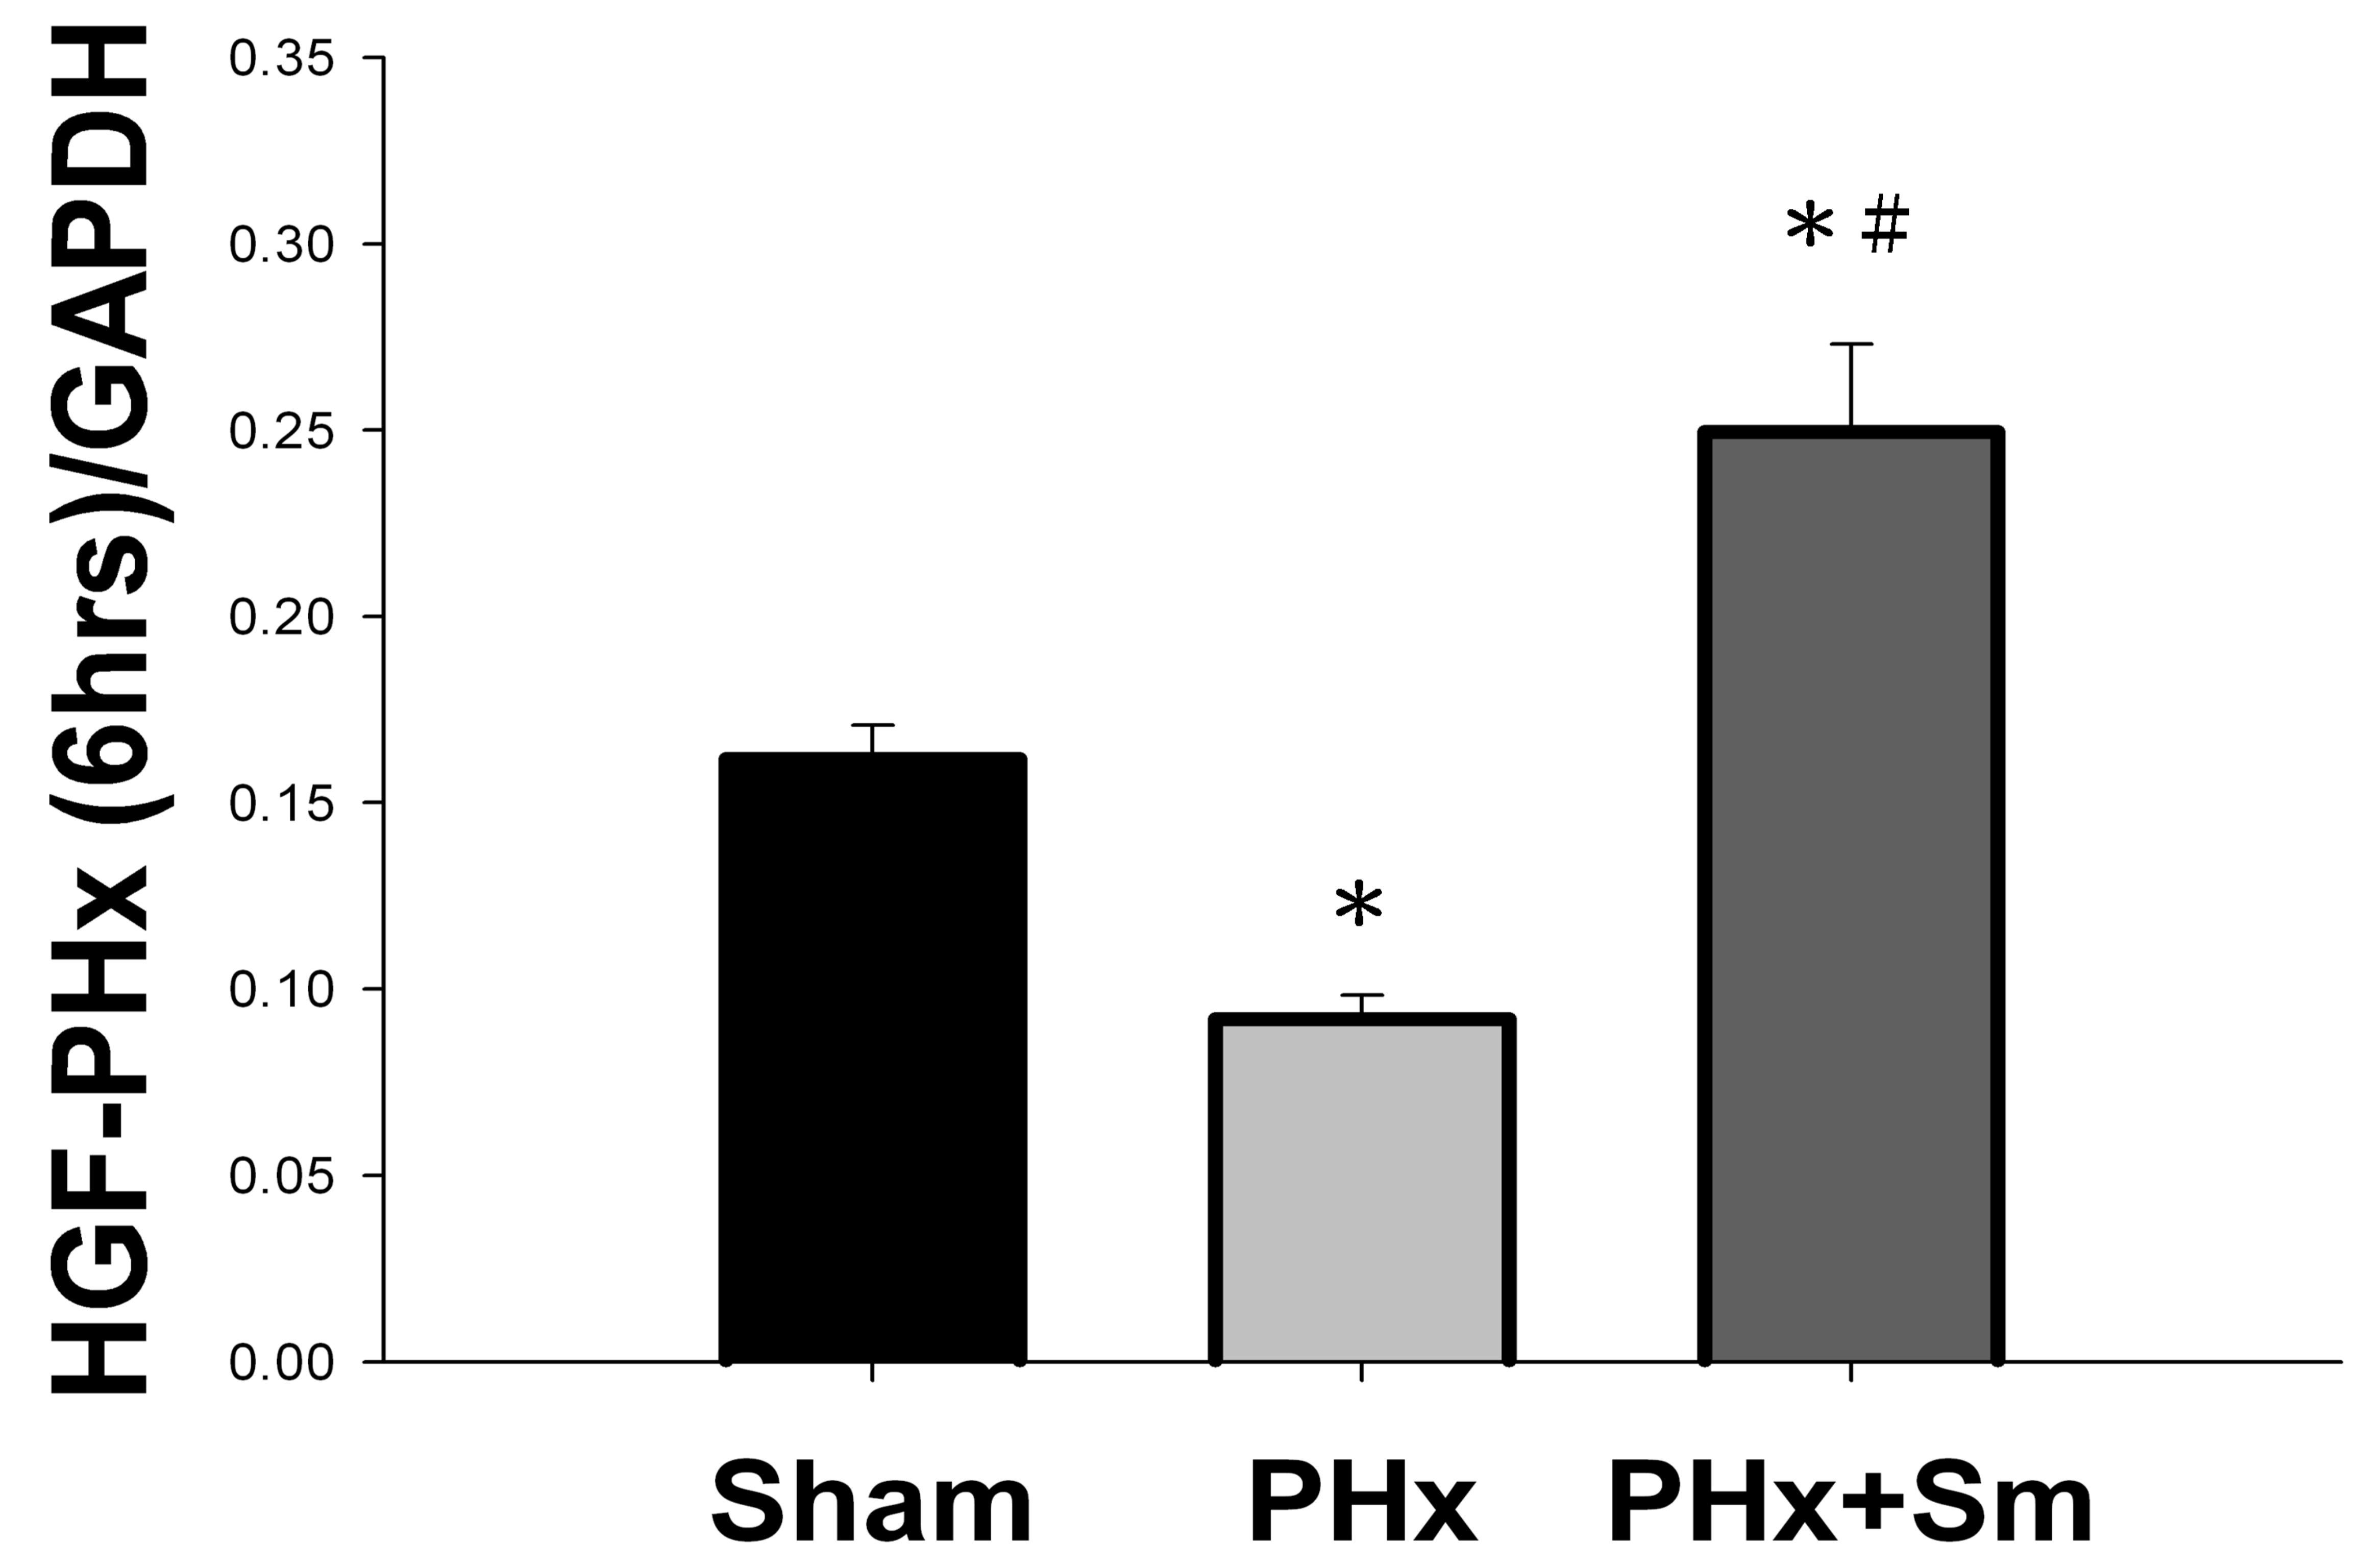

**HGF 72hrs PHx Protein expression**

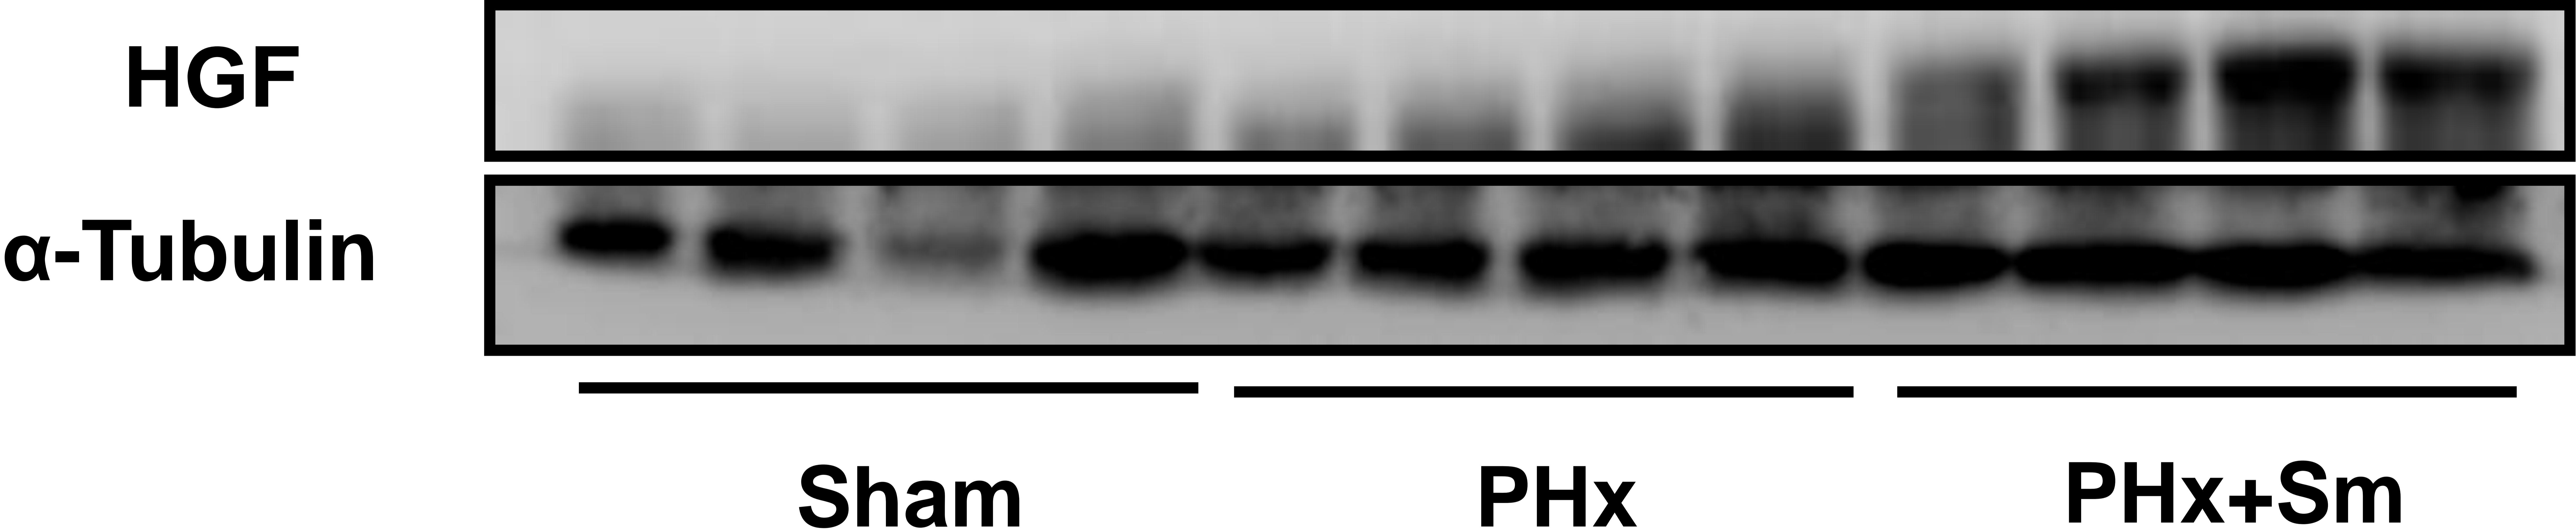

**HGF 72hrs PHx mRNA expression**

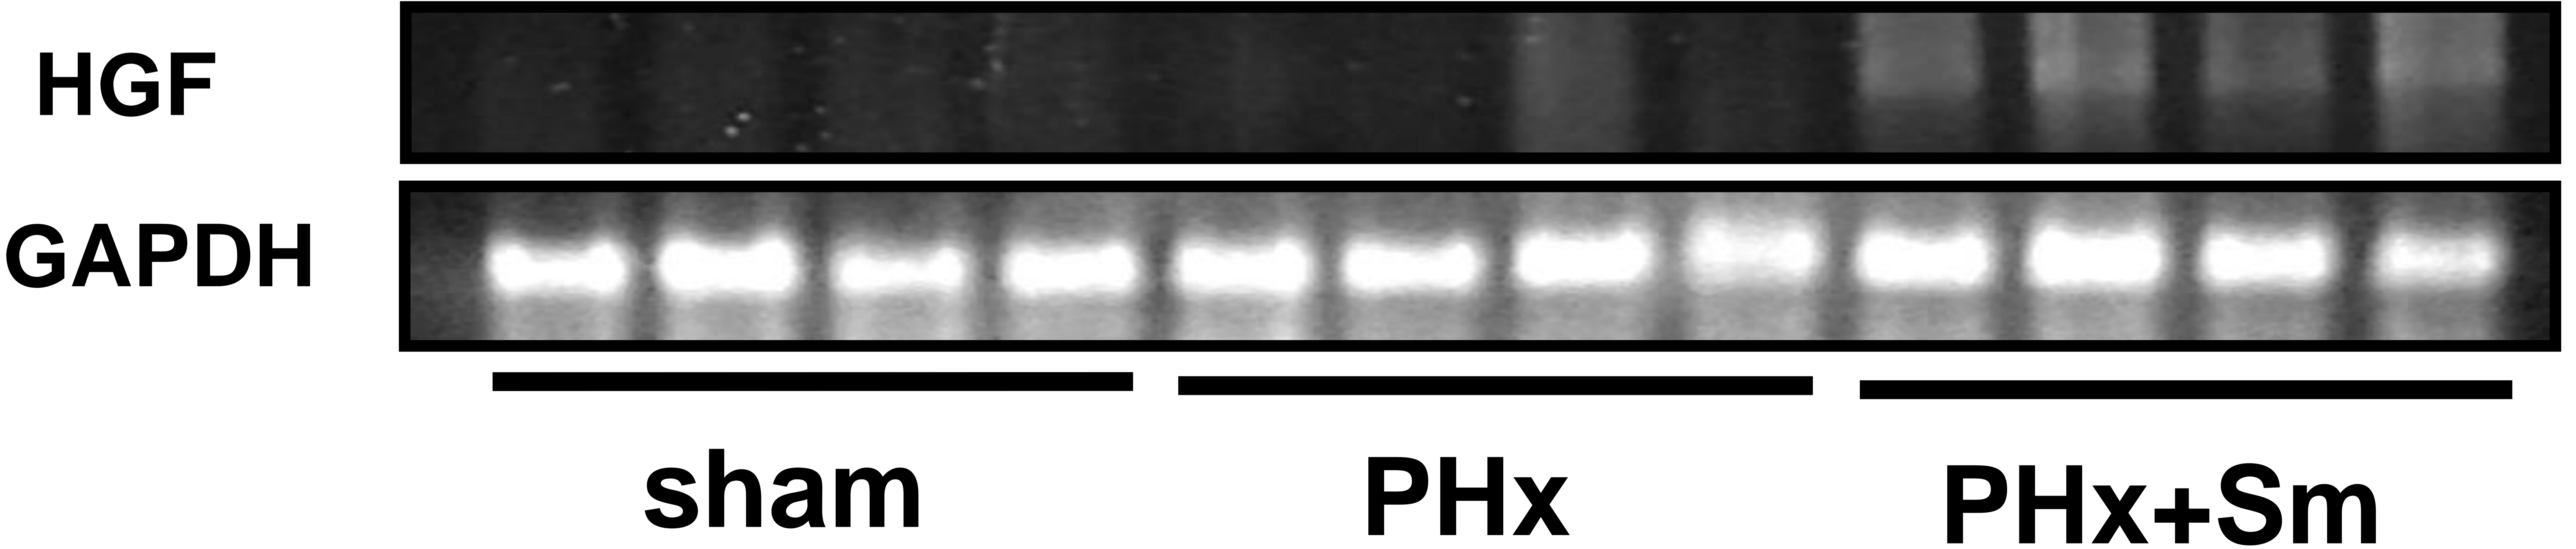

**HGF-PHx(72hrs)/Tubulin**

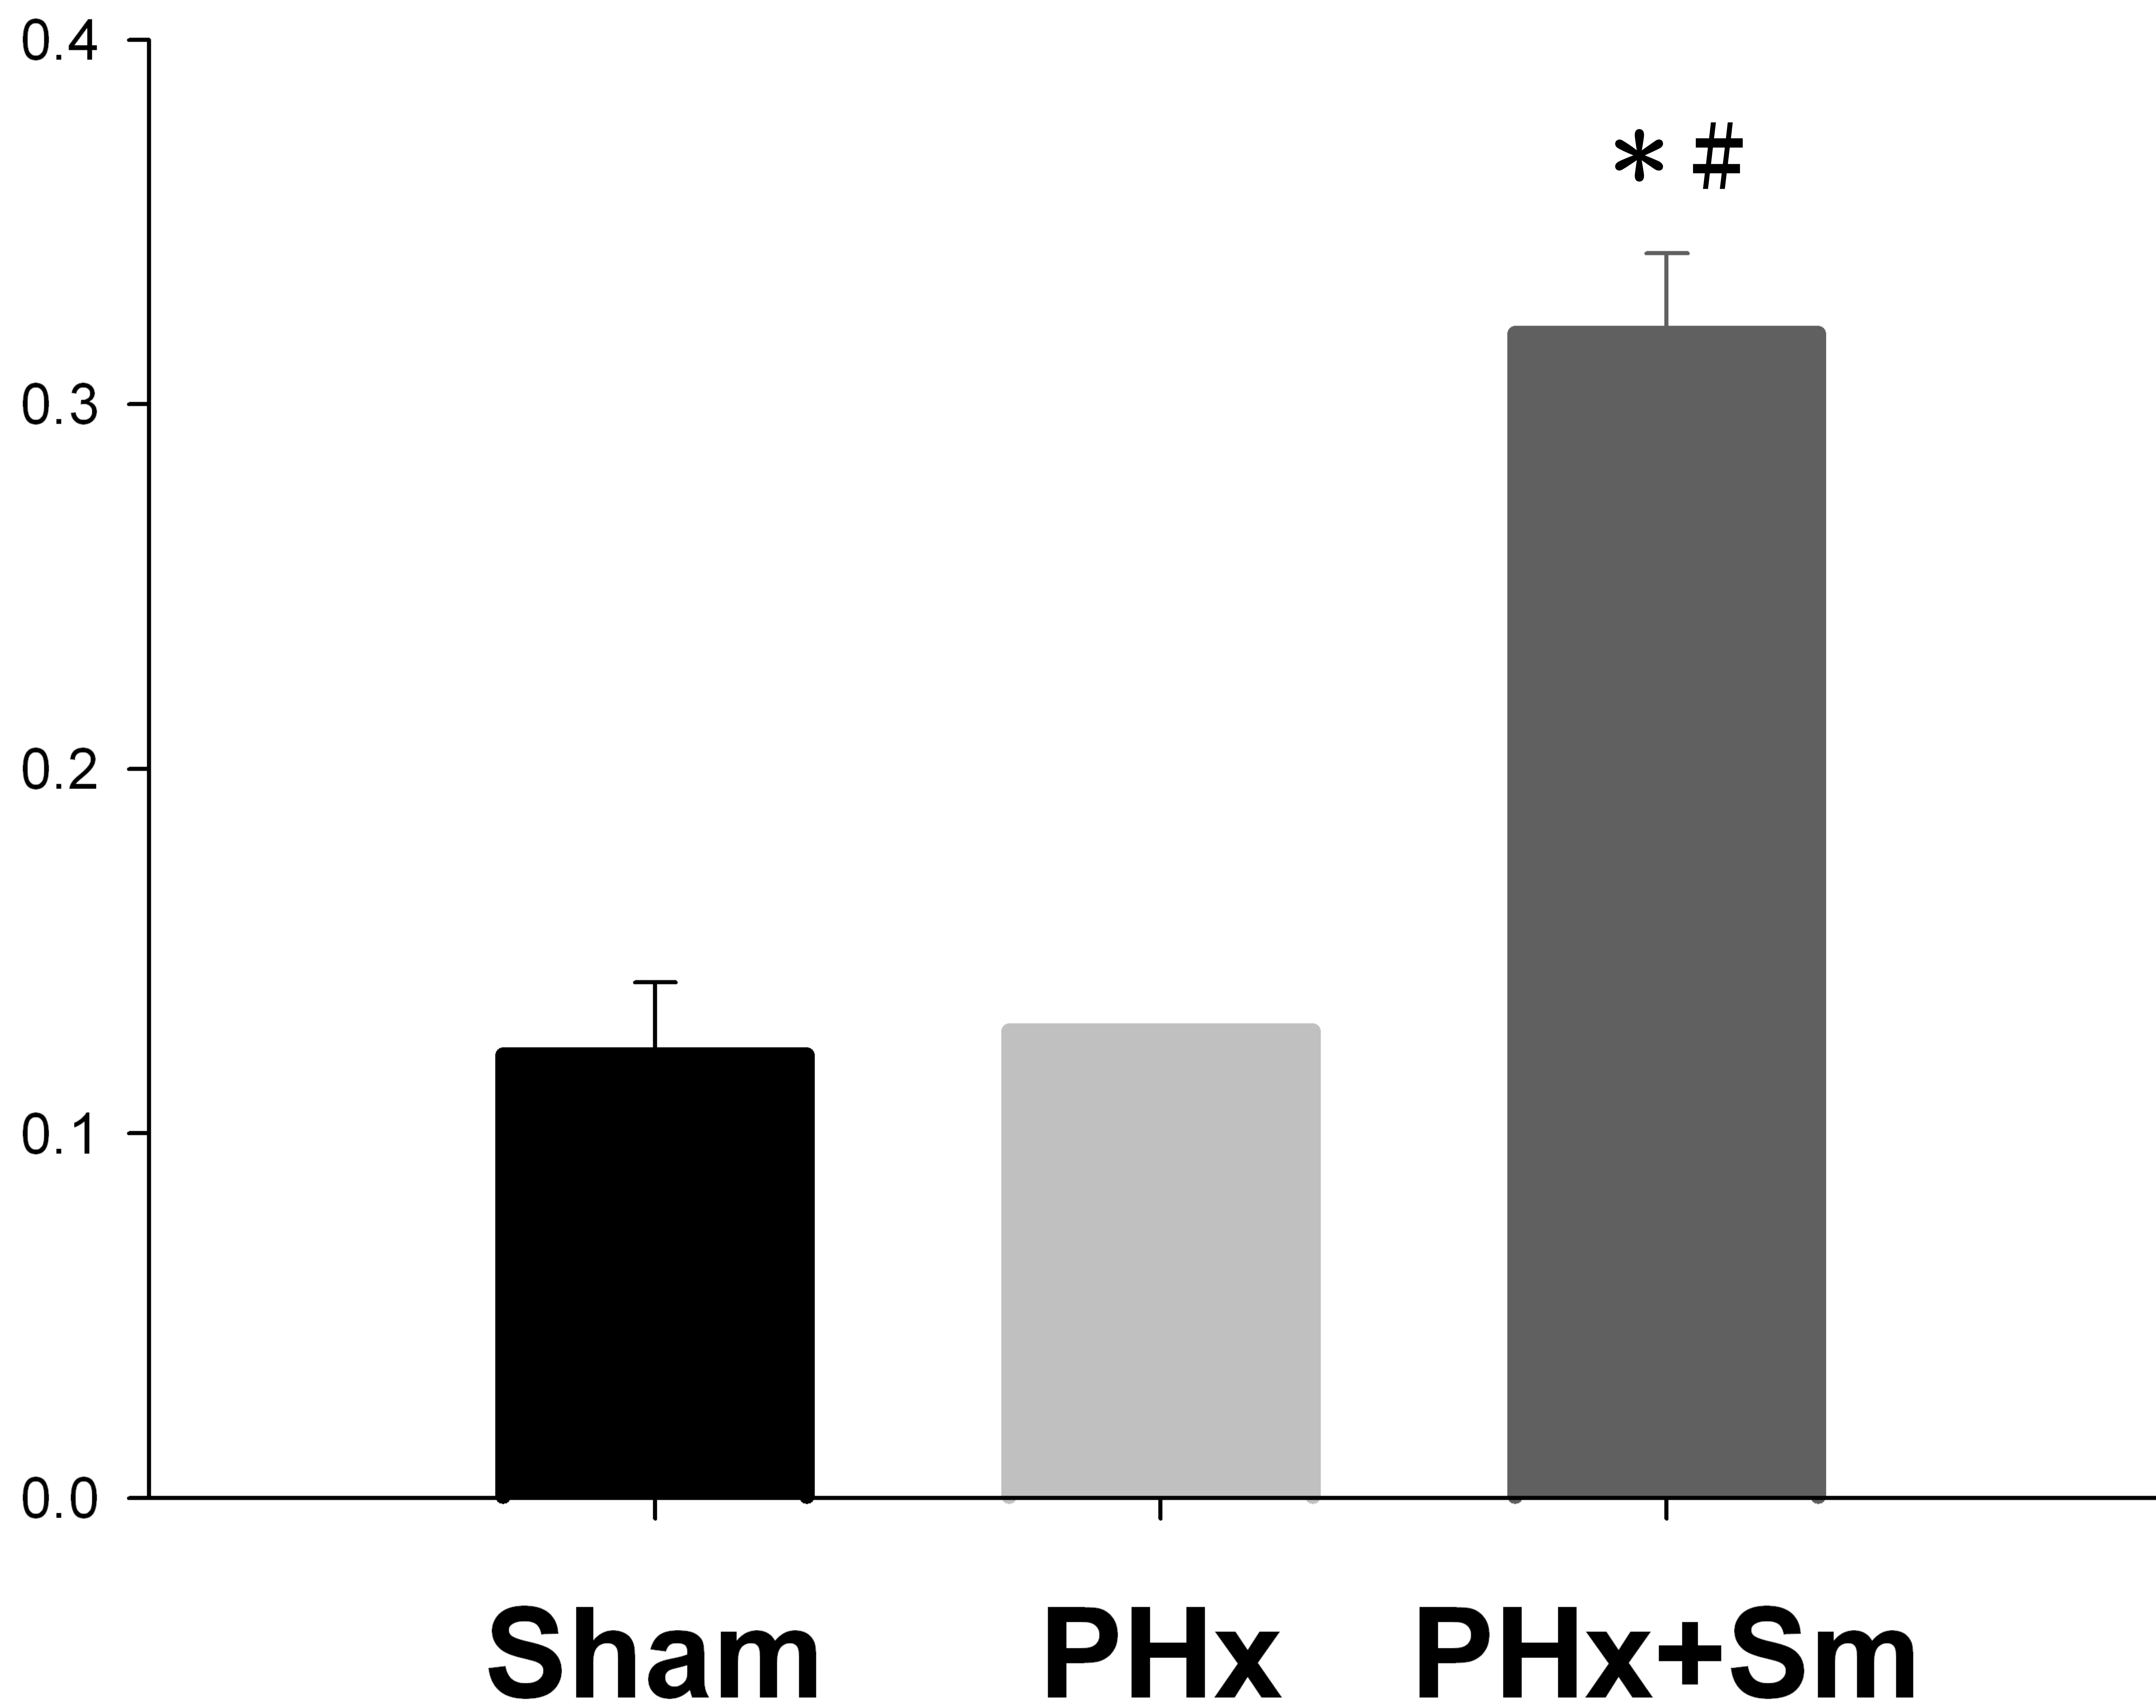

**HGF-PHx (72hrs)/GAPDH**

0.20  
0.18  
0.16  
0.14  
0.12  
0.10  
0.08  
0.06  
0.04  
0.02  
0.00

**Sham**

**PHx**

**PHx+Sm**

**\* #**

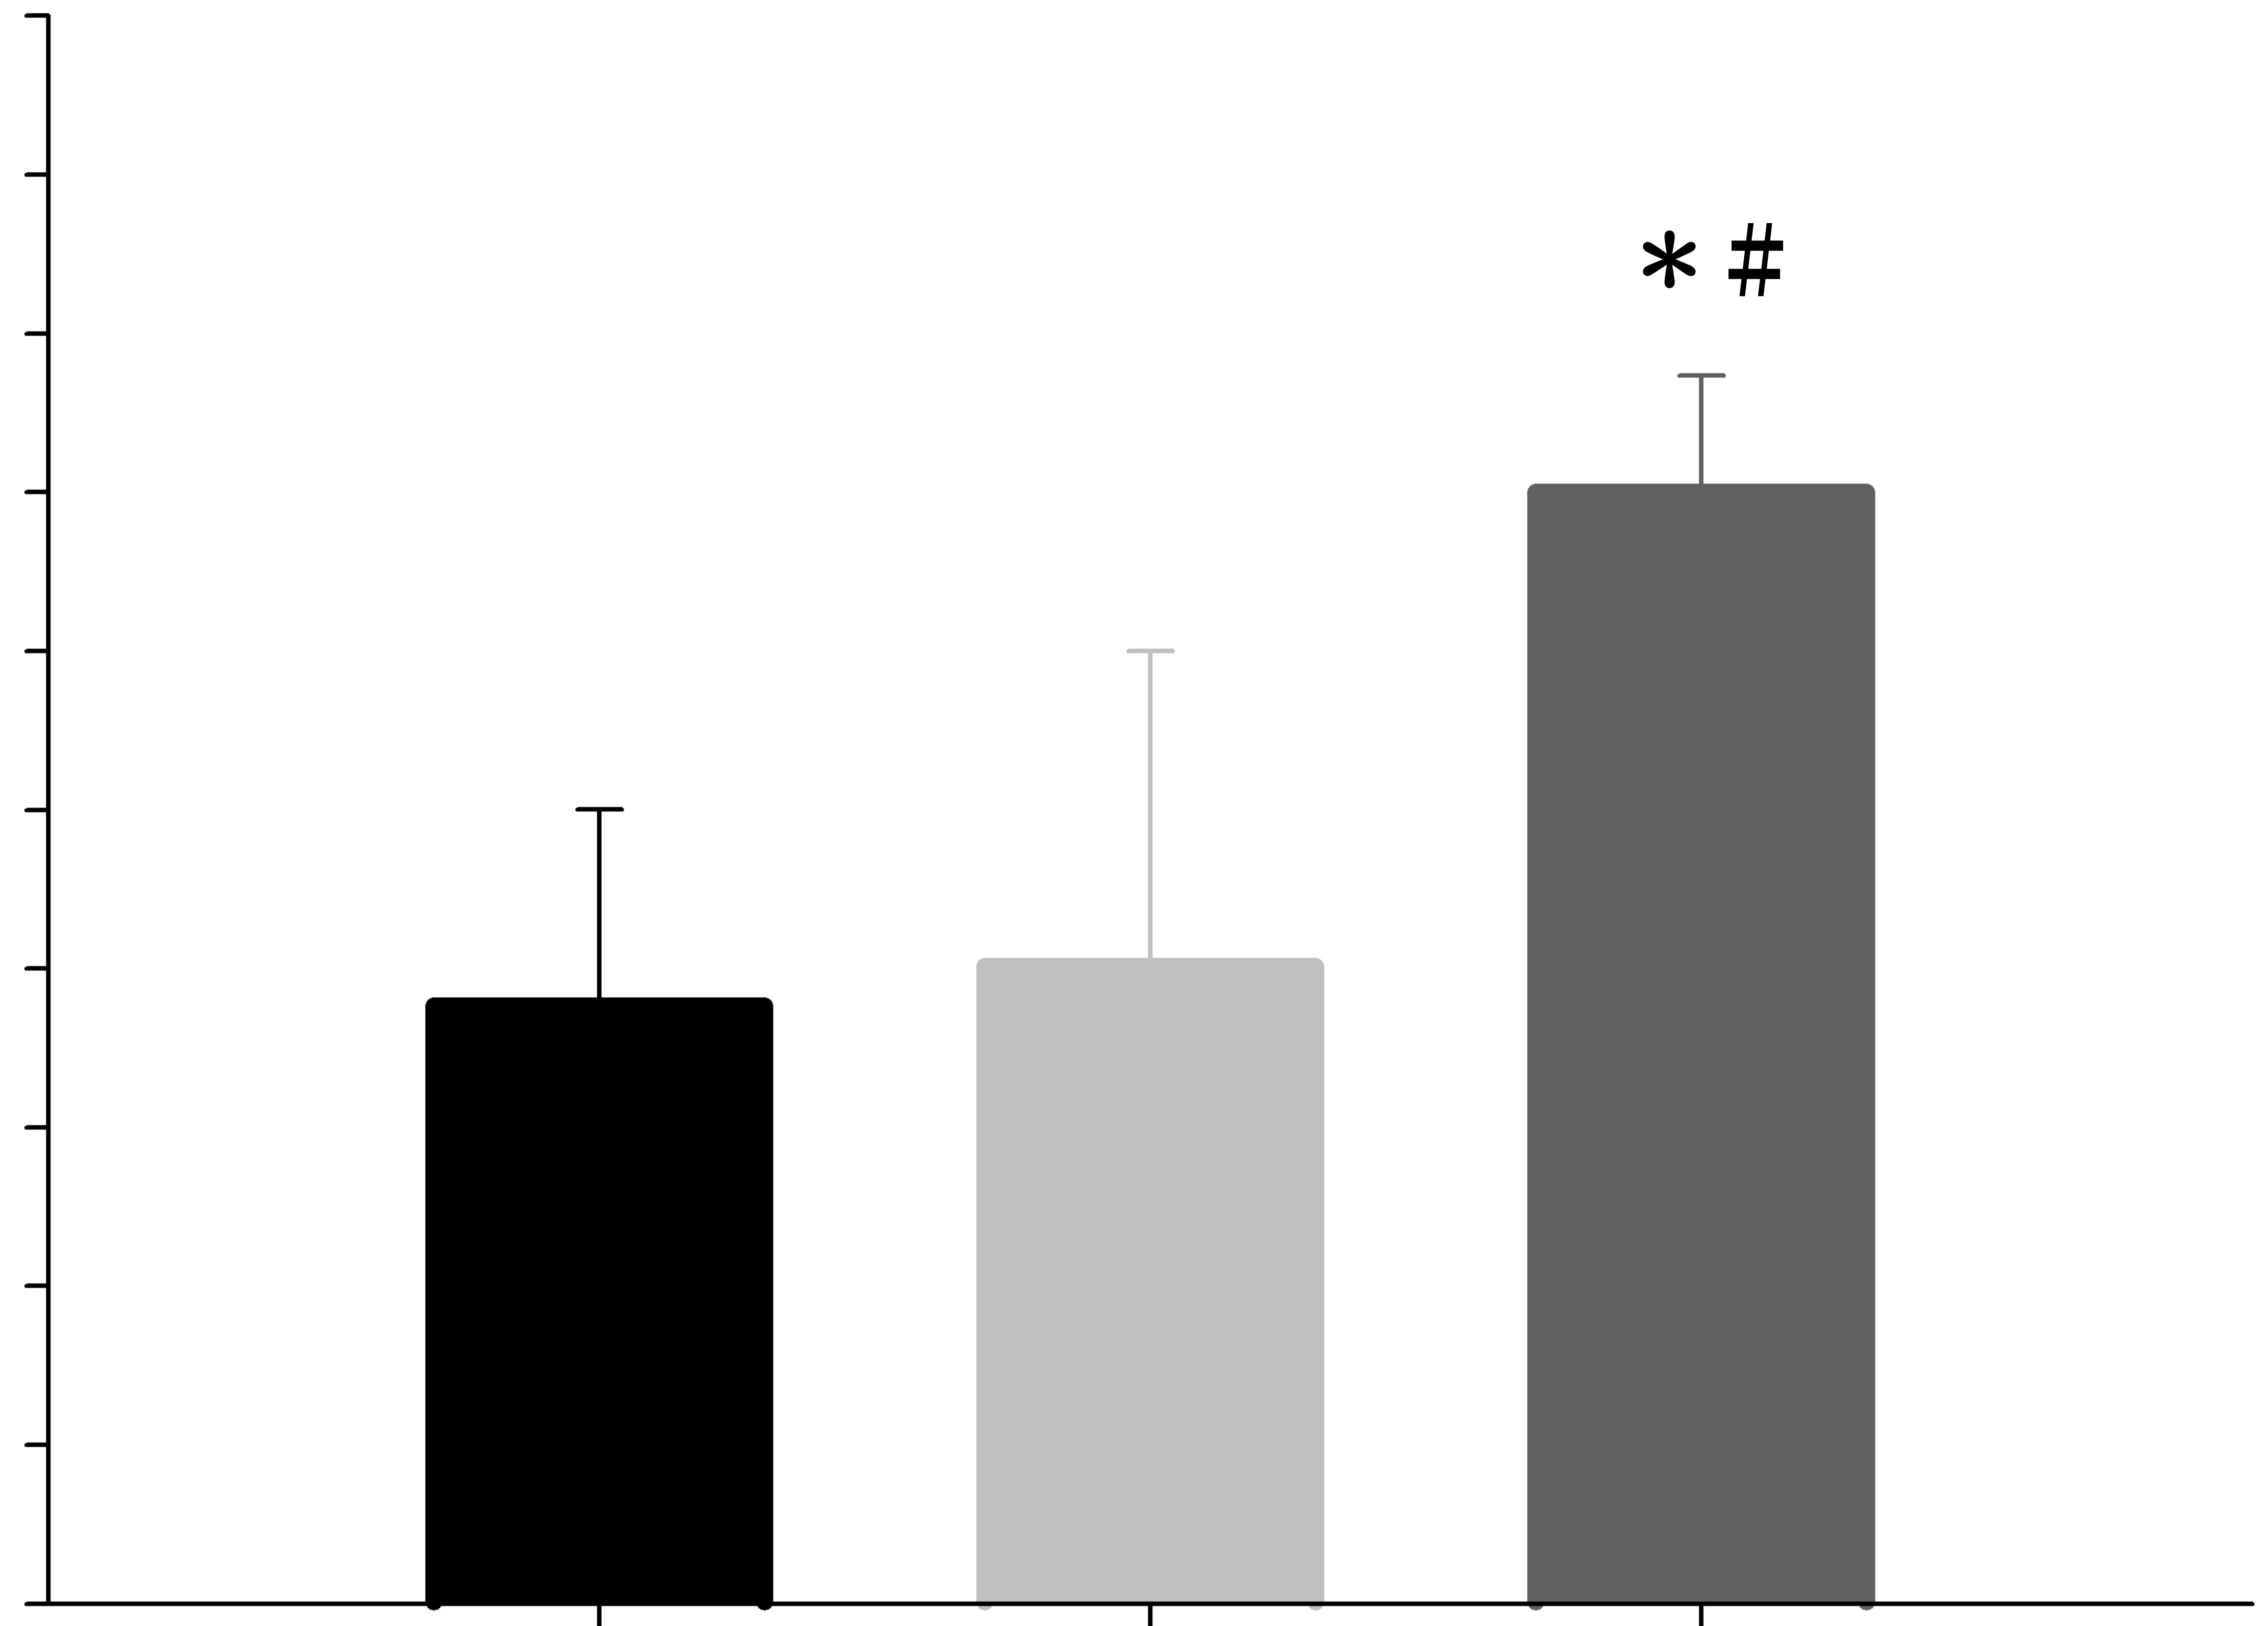

**TGFα (6hrs)**

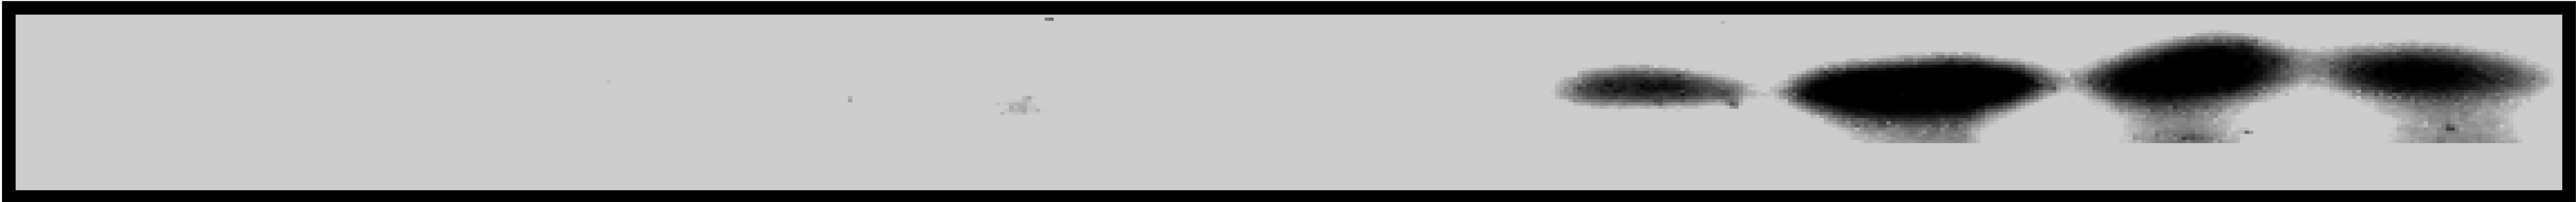

**TGFα (24hrs)**

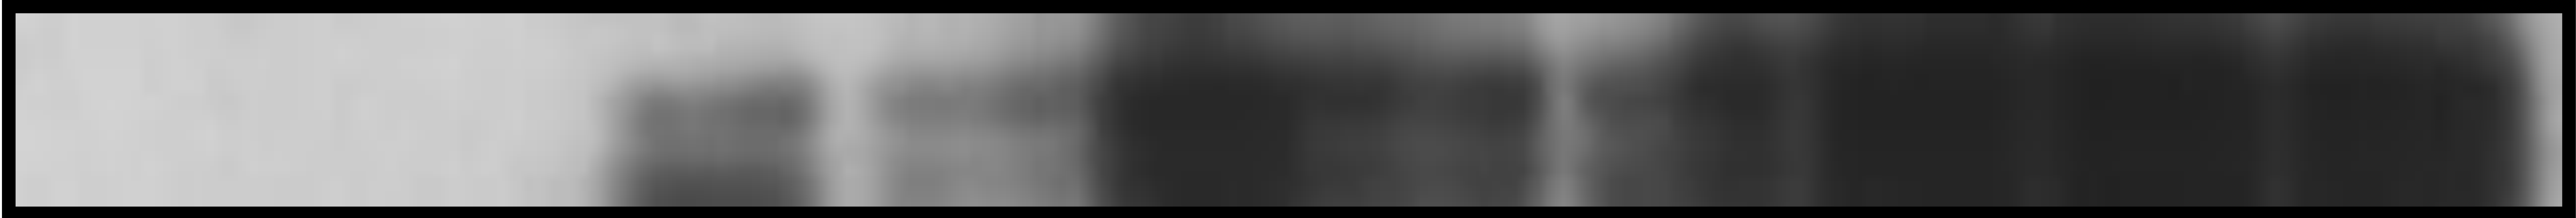

**TGFα (72hrs)**

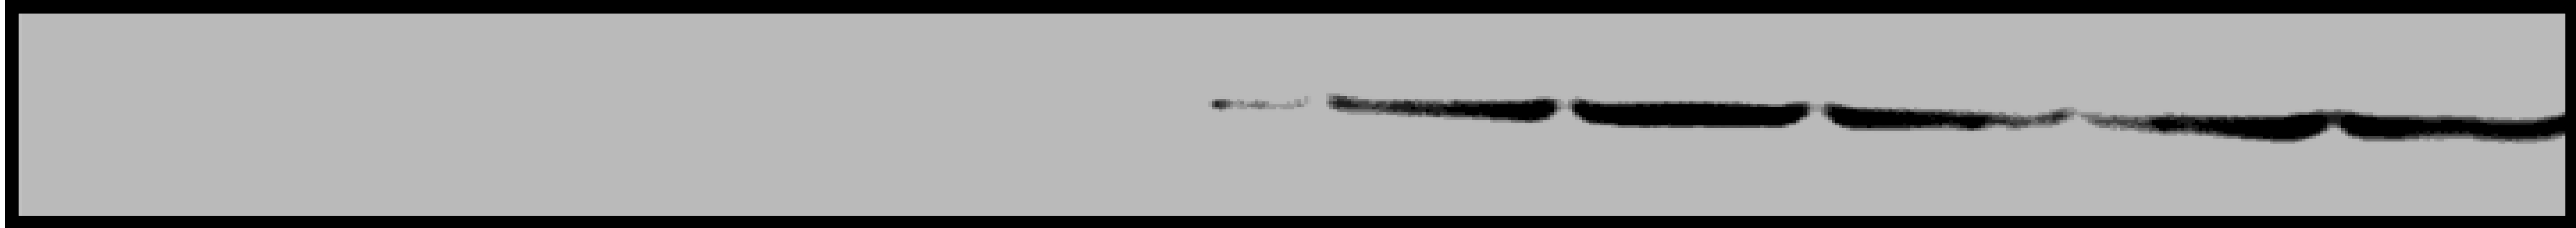

**sham**

**PHx**

**PHx+Sm**

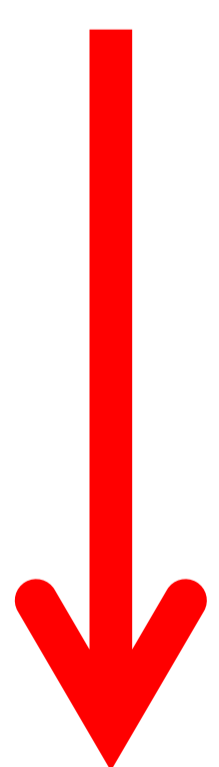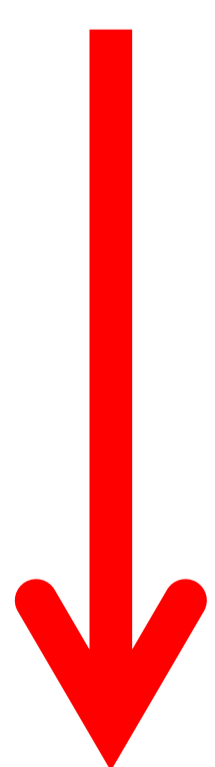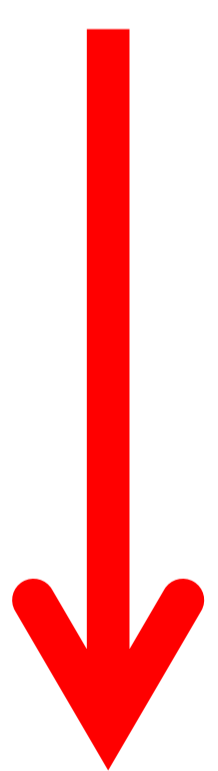

**3 wells**

**4 wells**

**4 wells**

**TGF $\alpha$  (6hrs)**

**TGF $\alpha$  (24hrs)**

**TGF $\alpha$  (72hrs)**

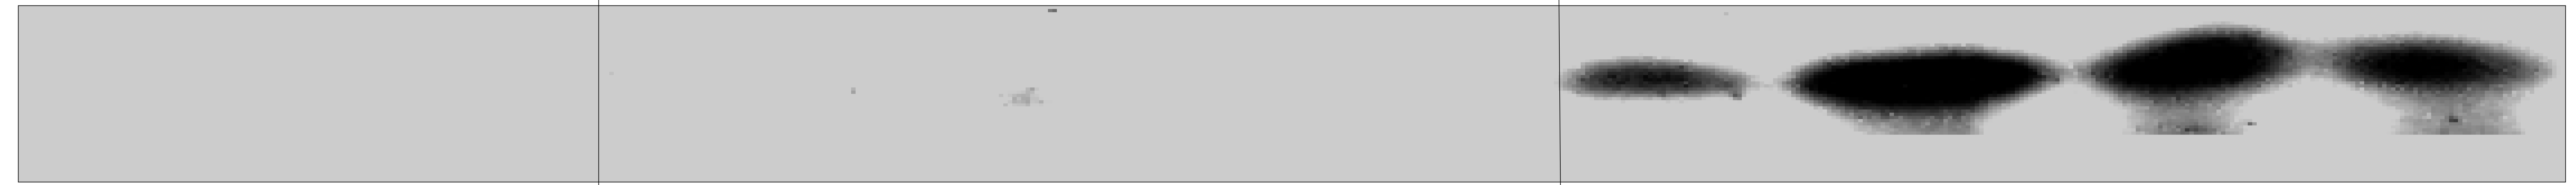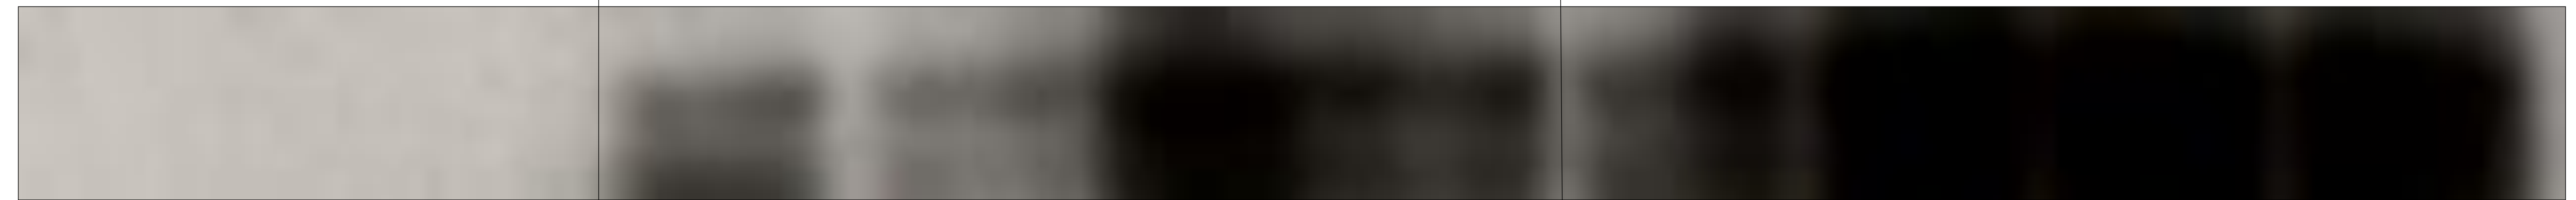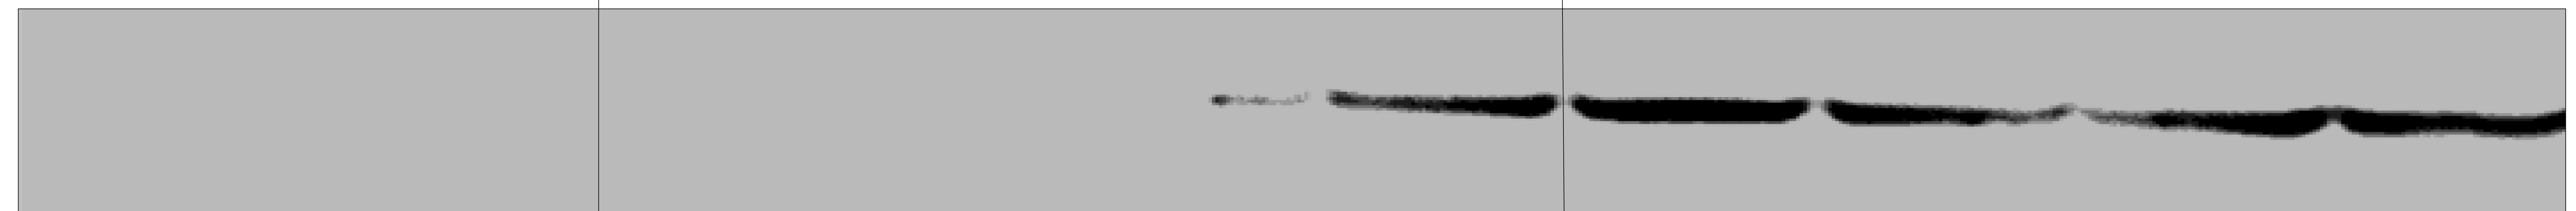

**sham**

**PHx**

**PHx+Sm**

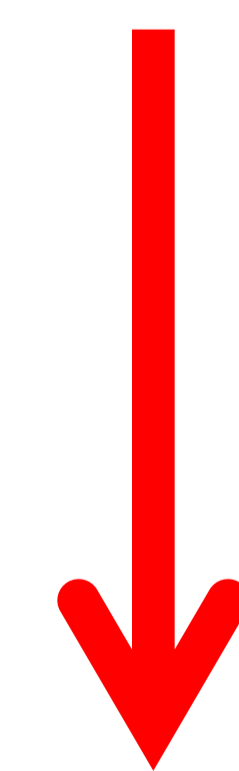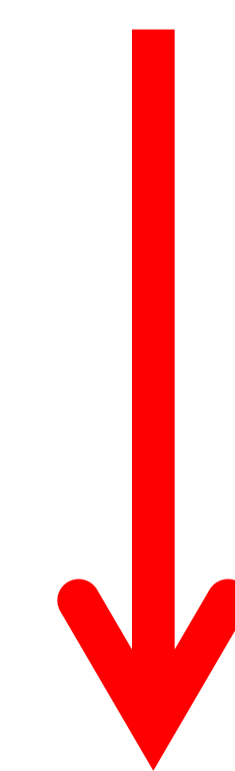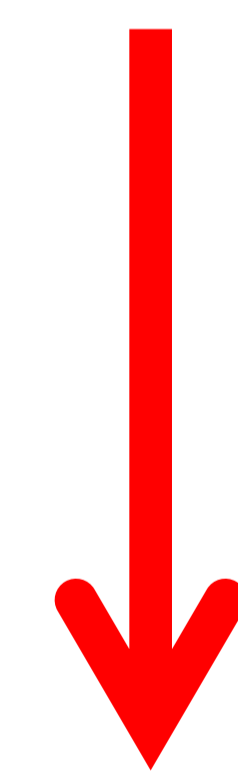

**3 wells**

**4 wells**

**4 wells**

**TGFα (6hrs)**

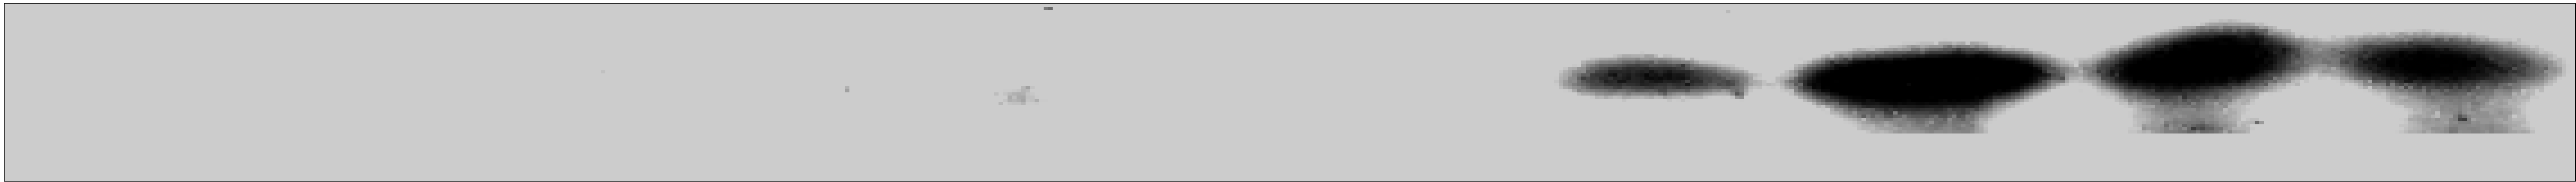

**TGFα (24hrs)**

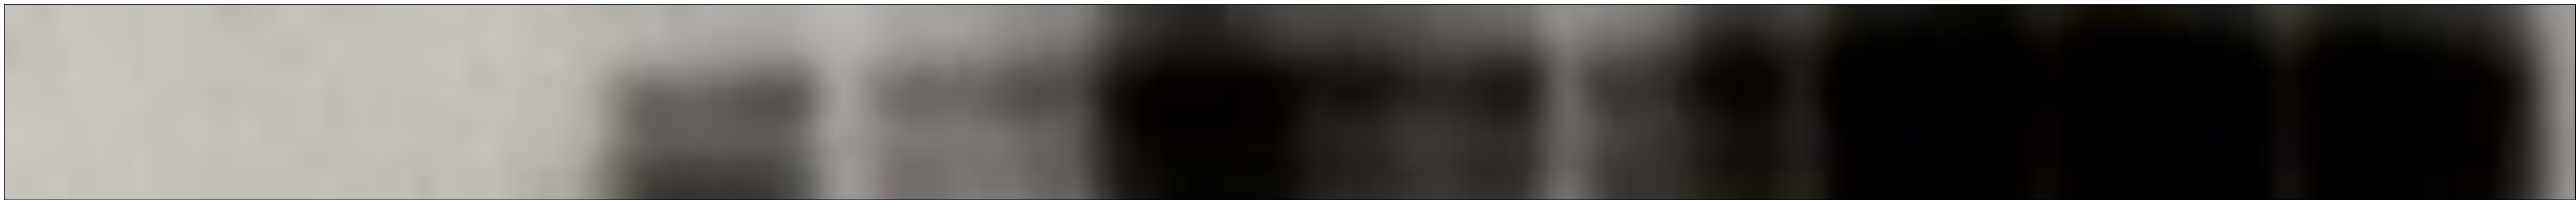

**TGFα (72hrs)**

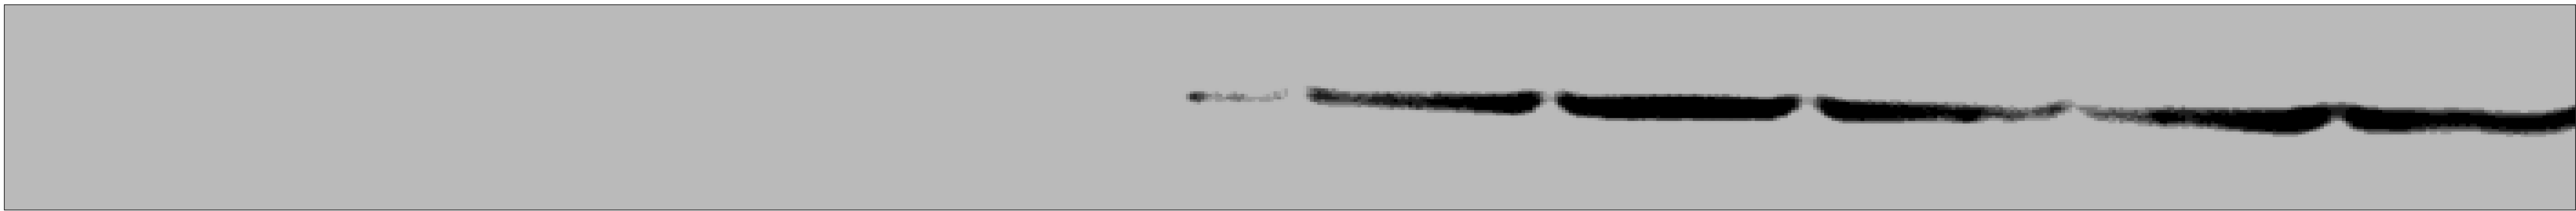

**sham**

**PHx**

**PHx+Sm**



**A**

### HGF 6hrs PHx Protein expression

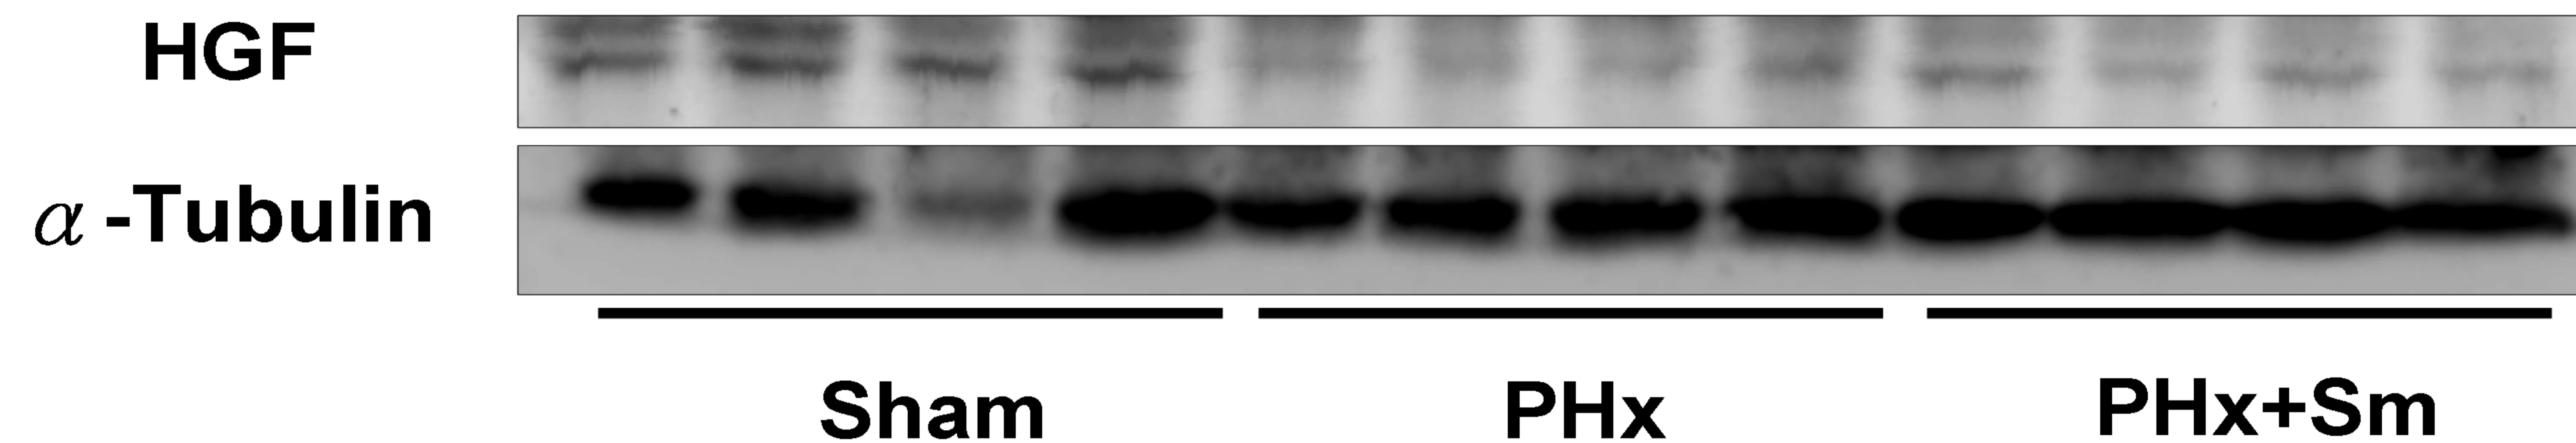

### HGF 6hrs PHx mRNA expression

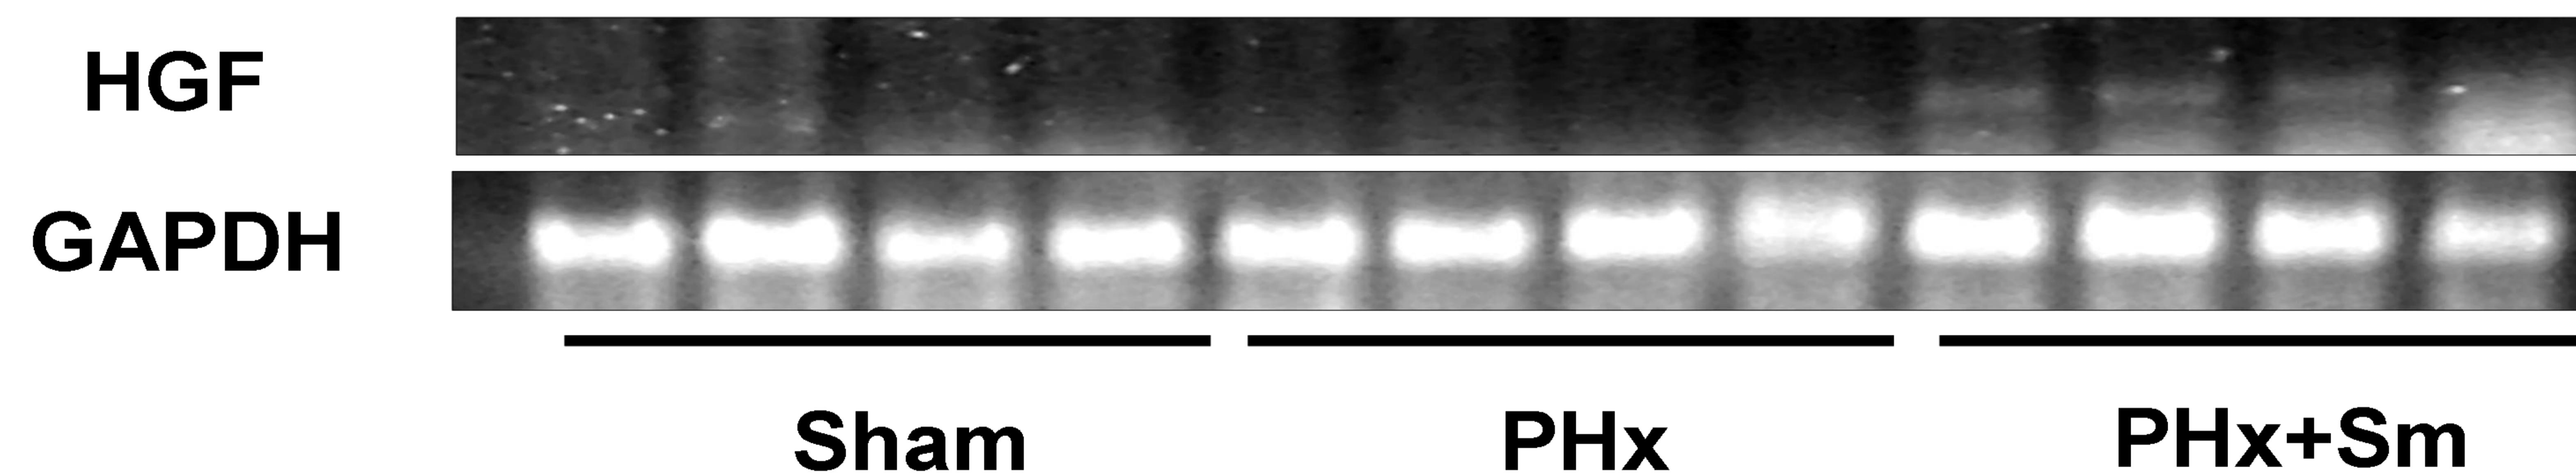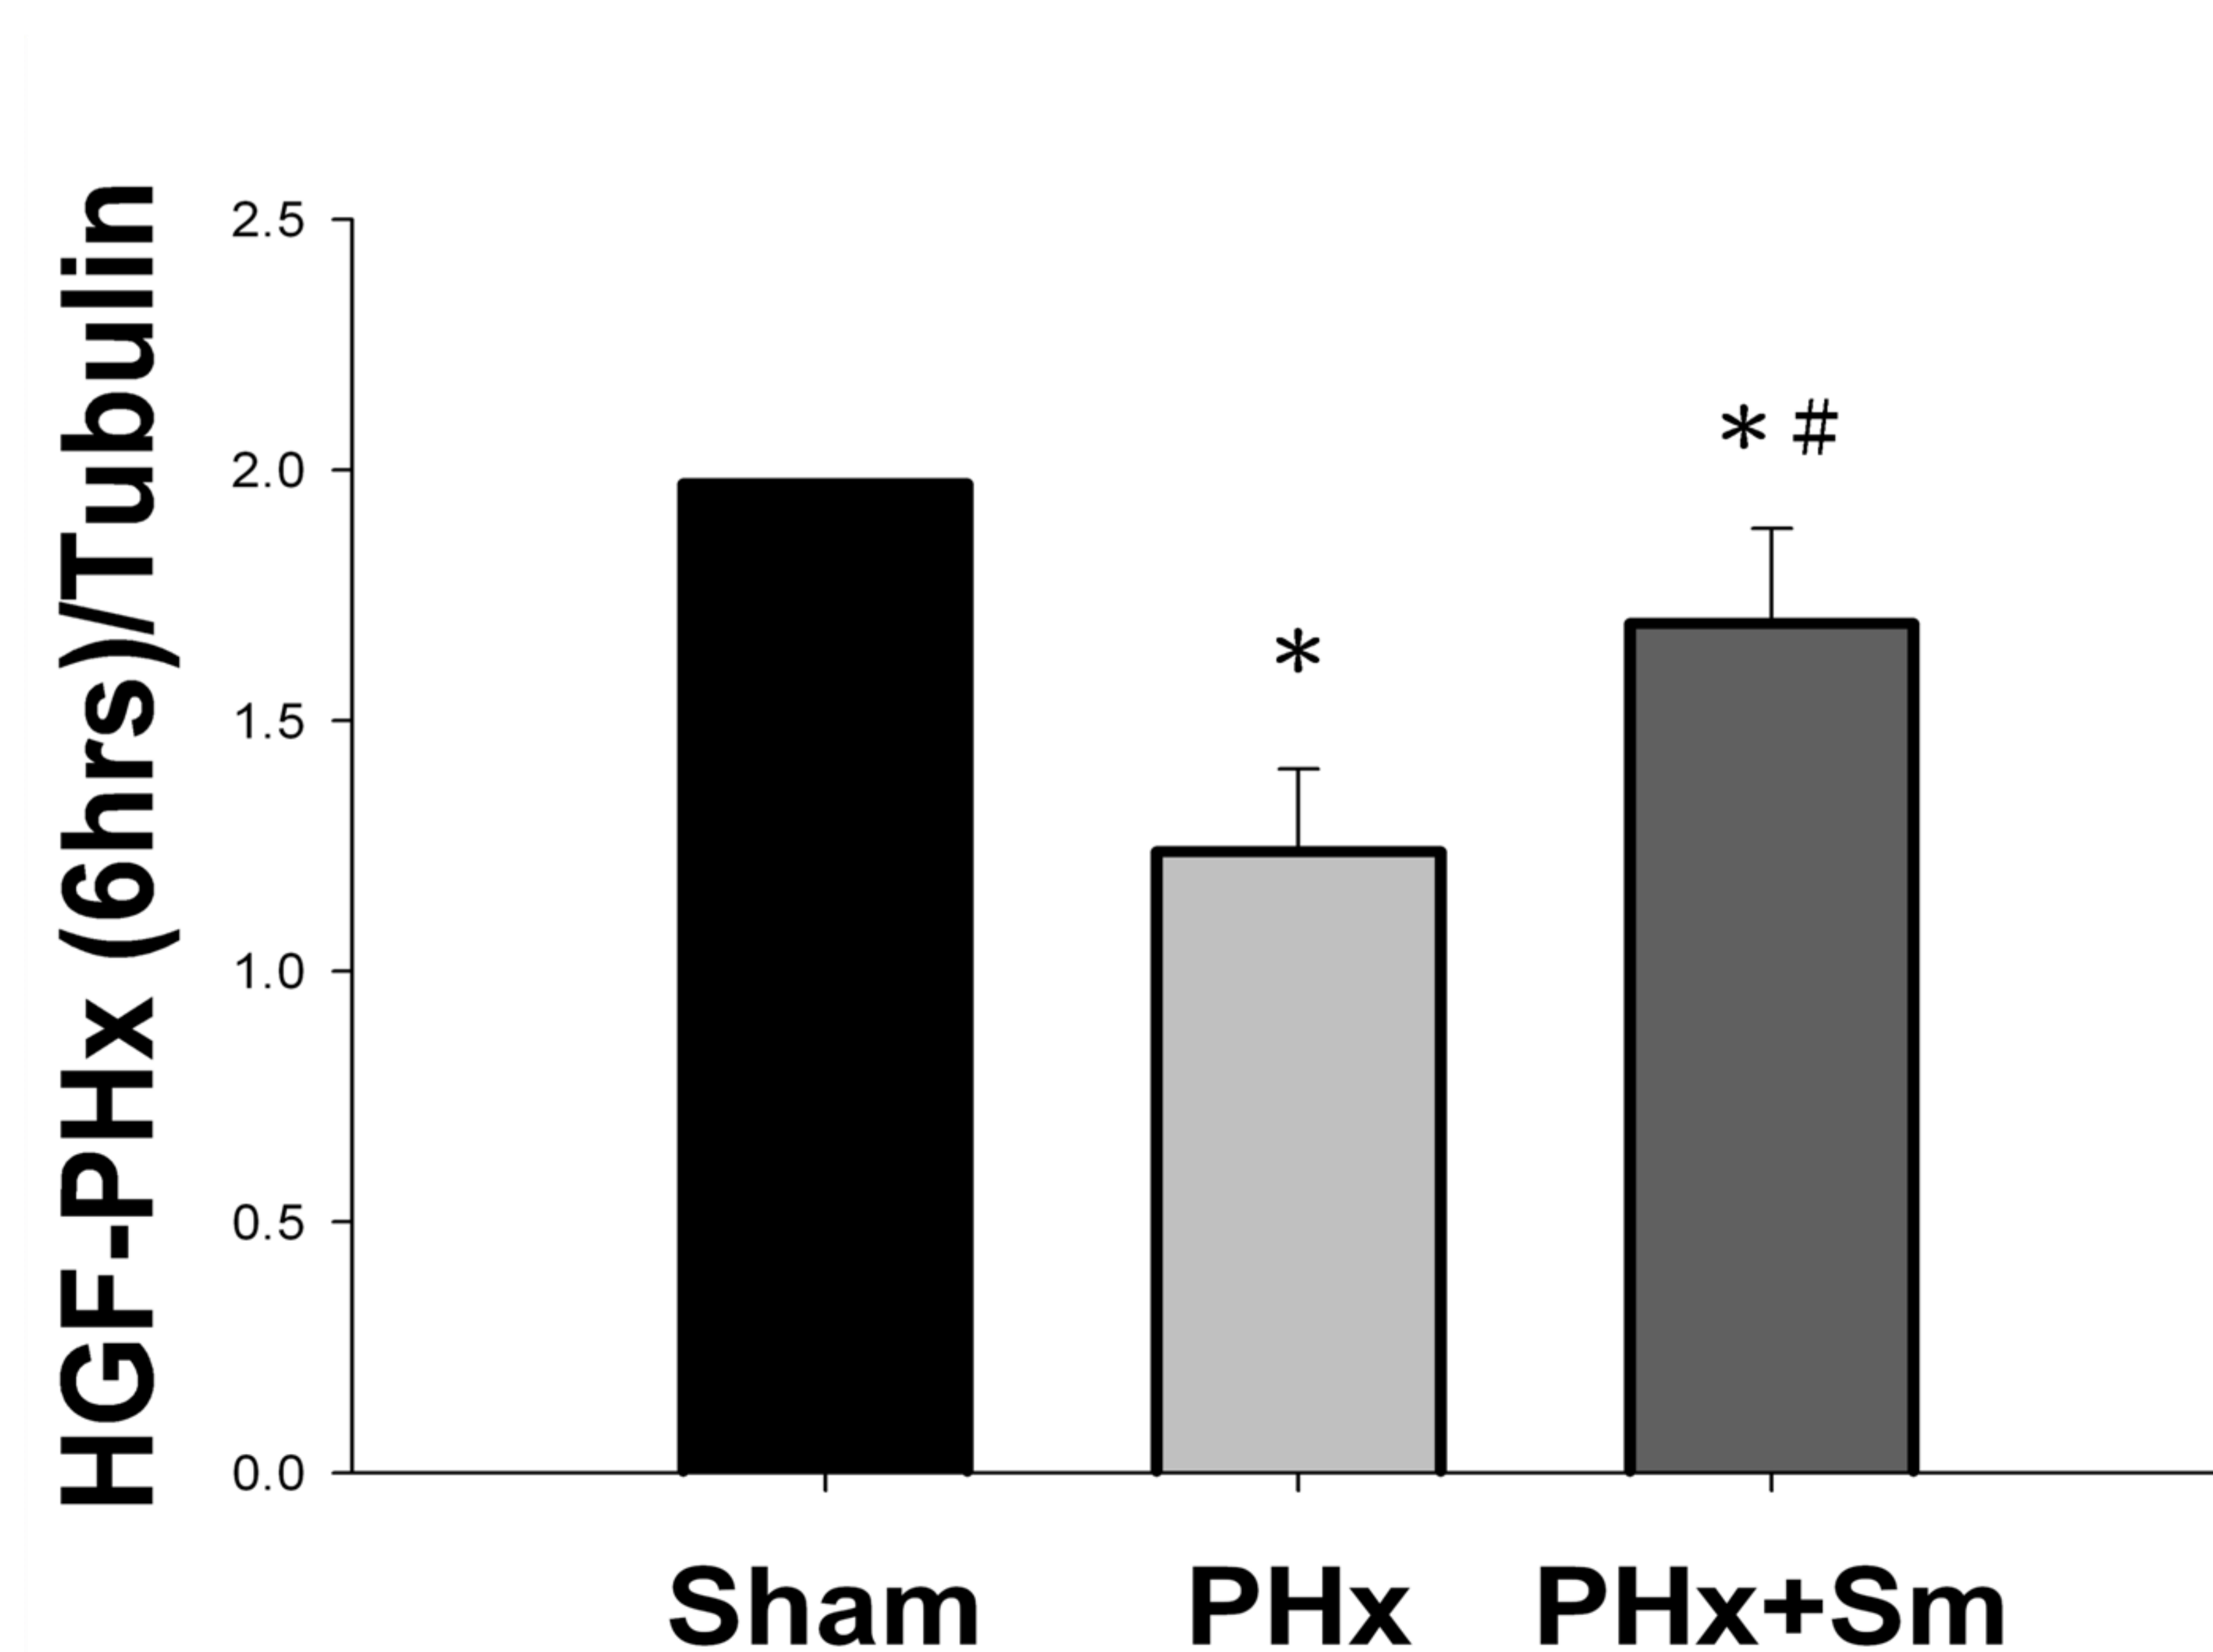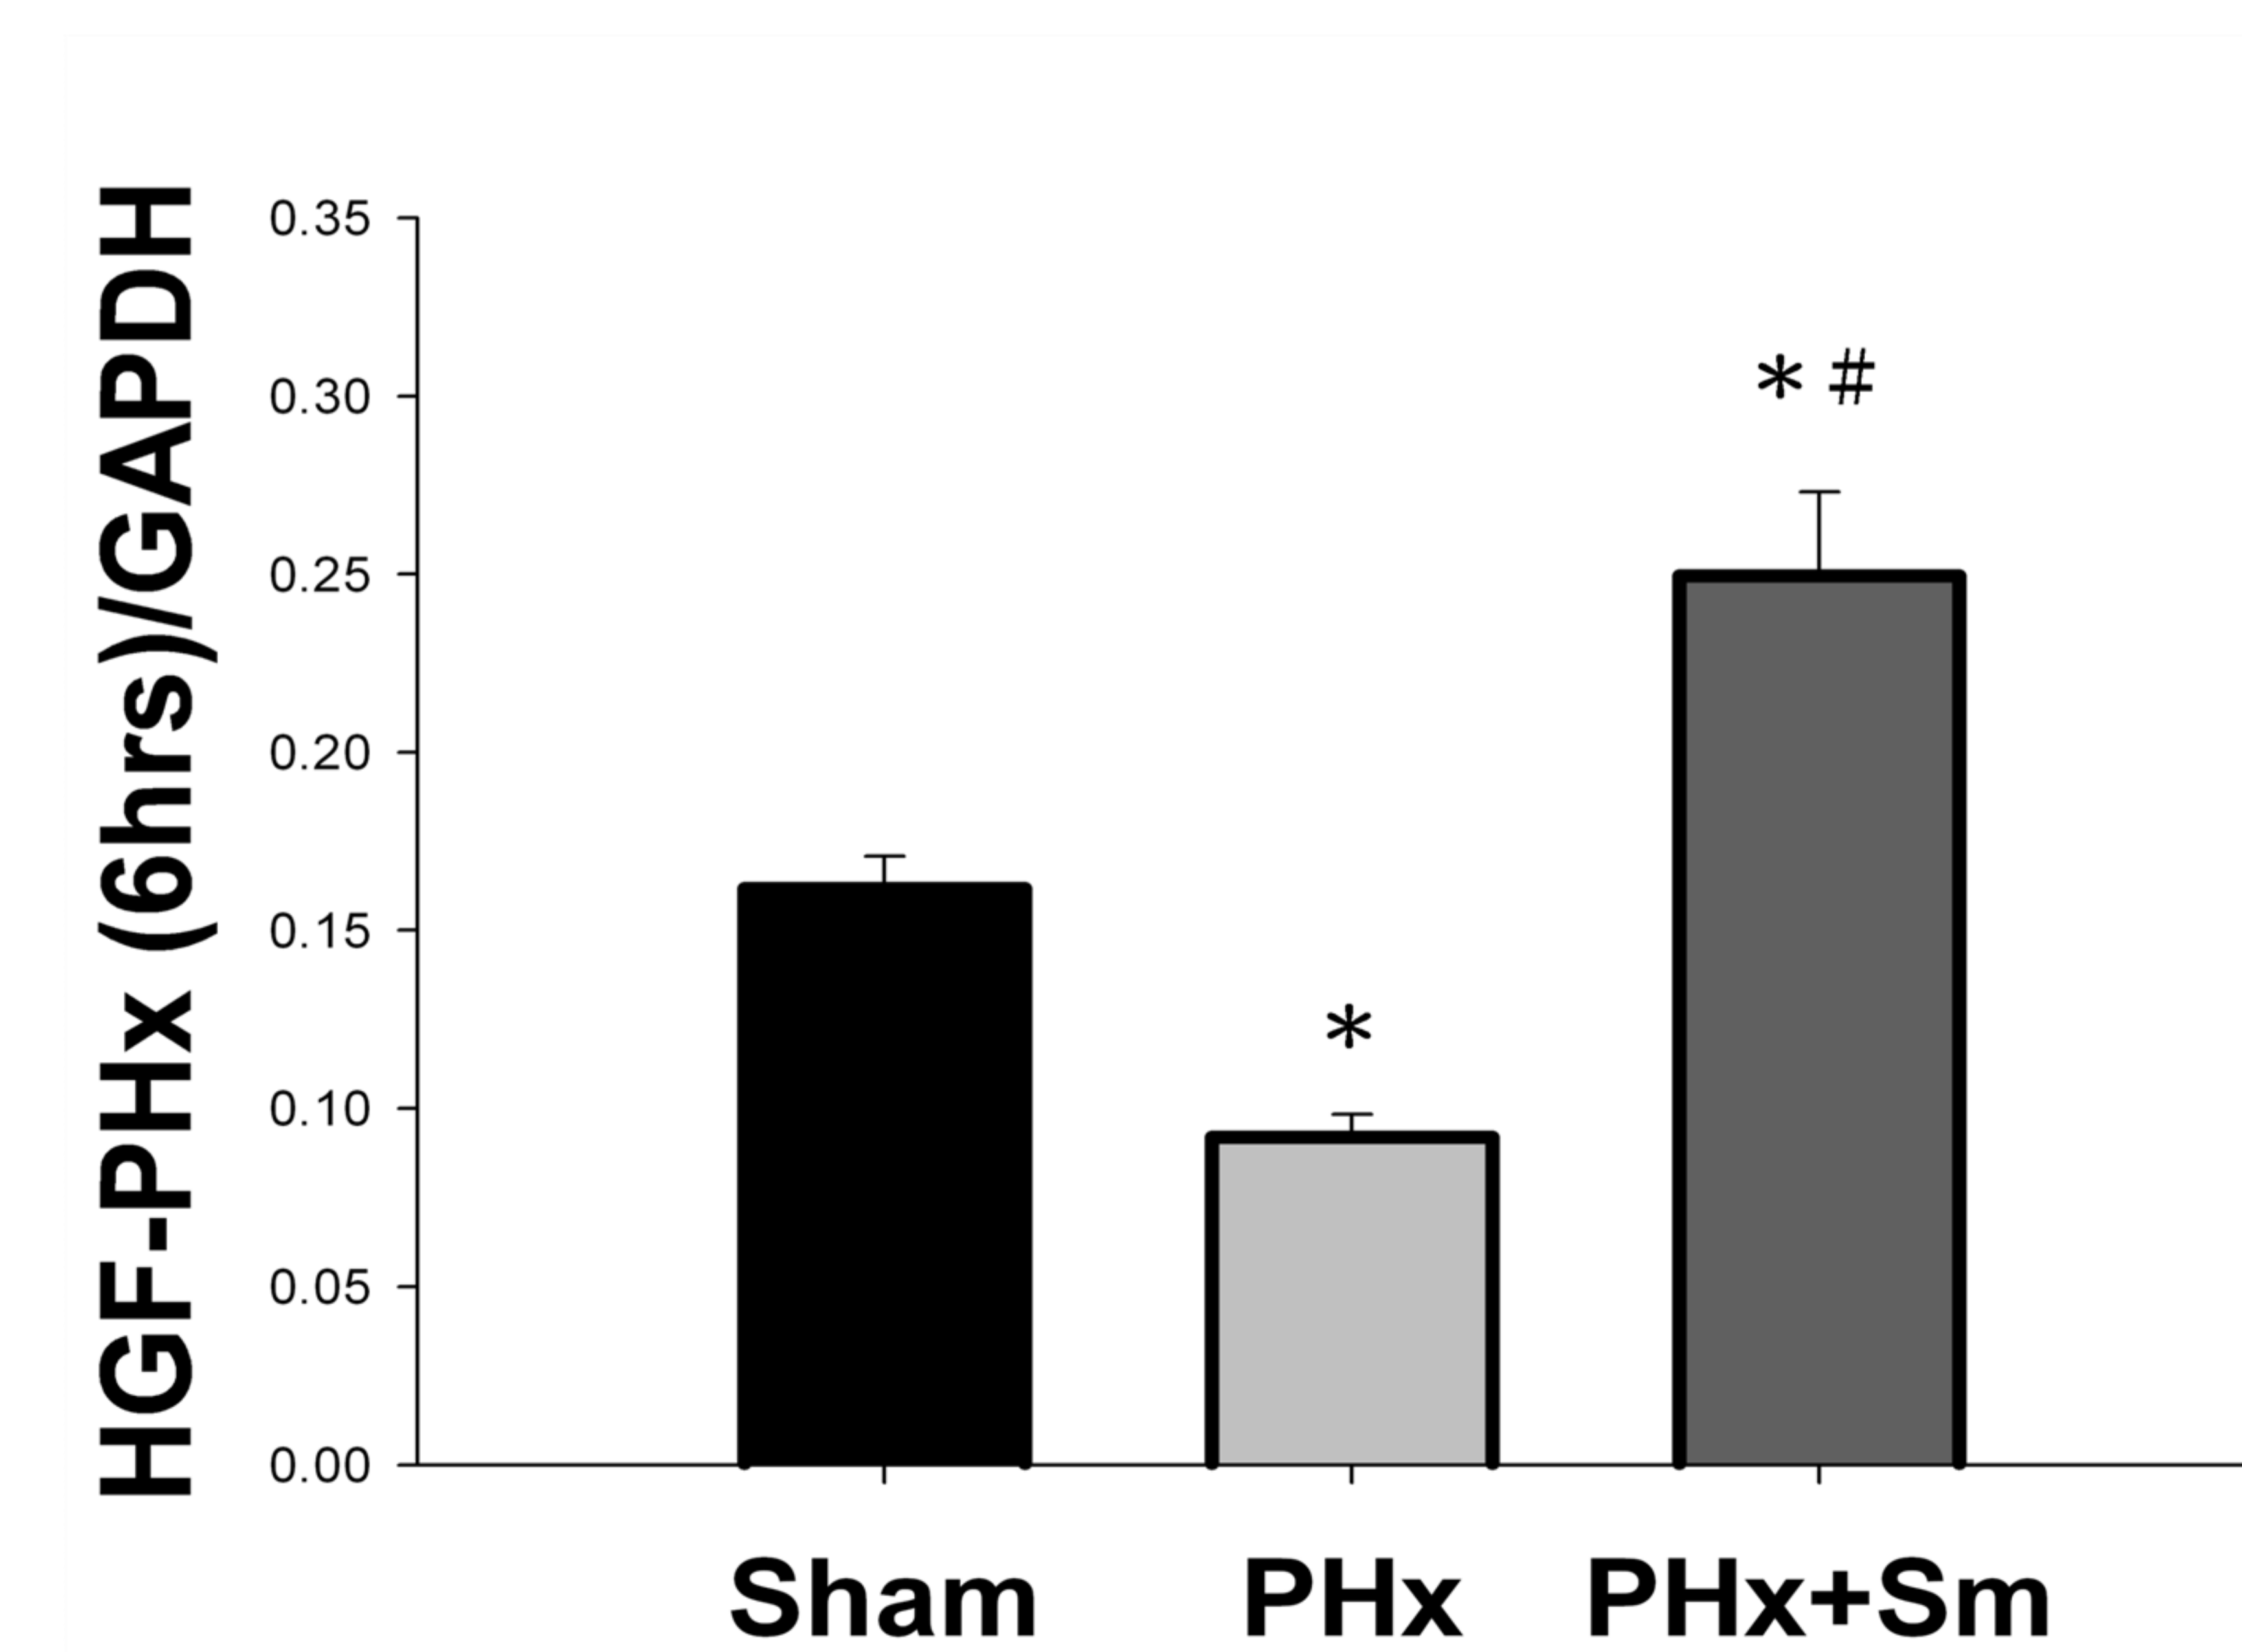

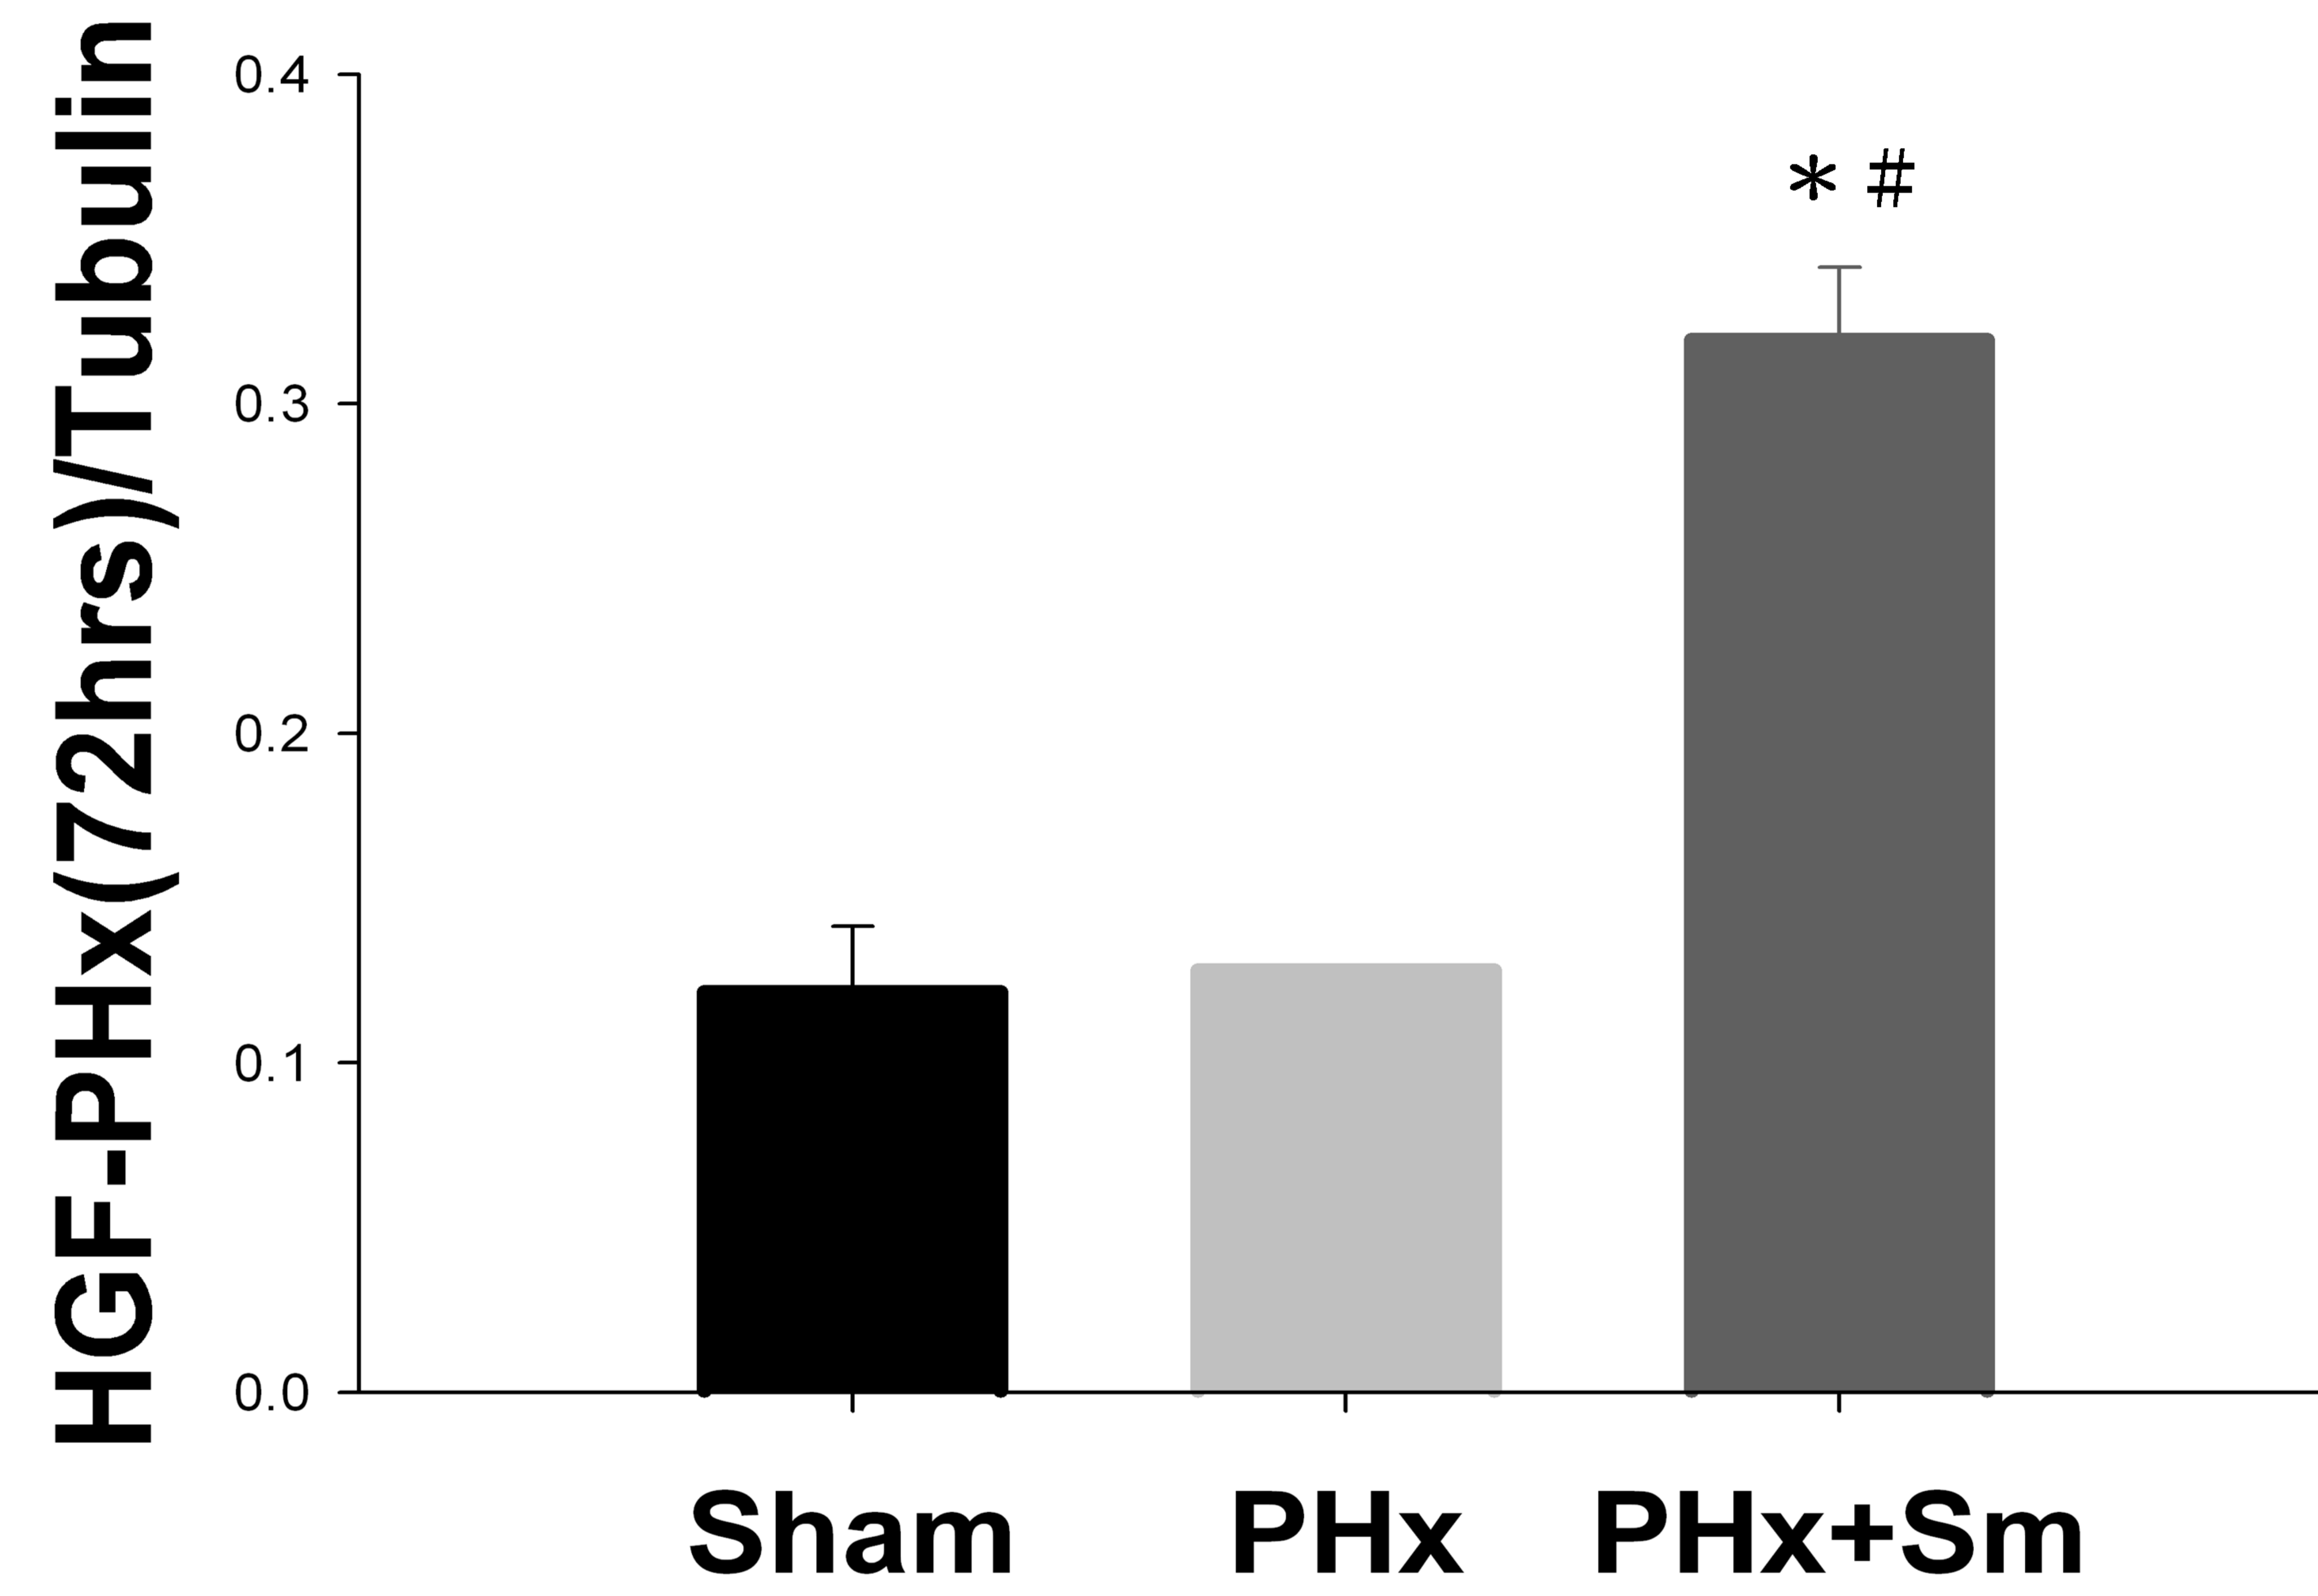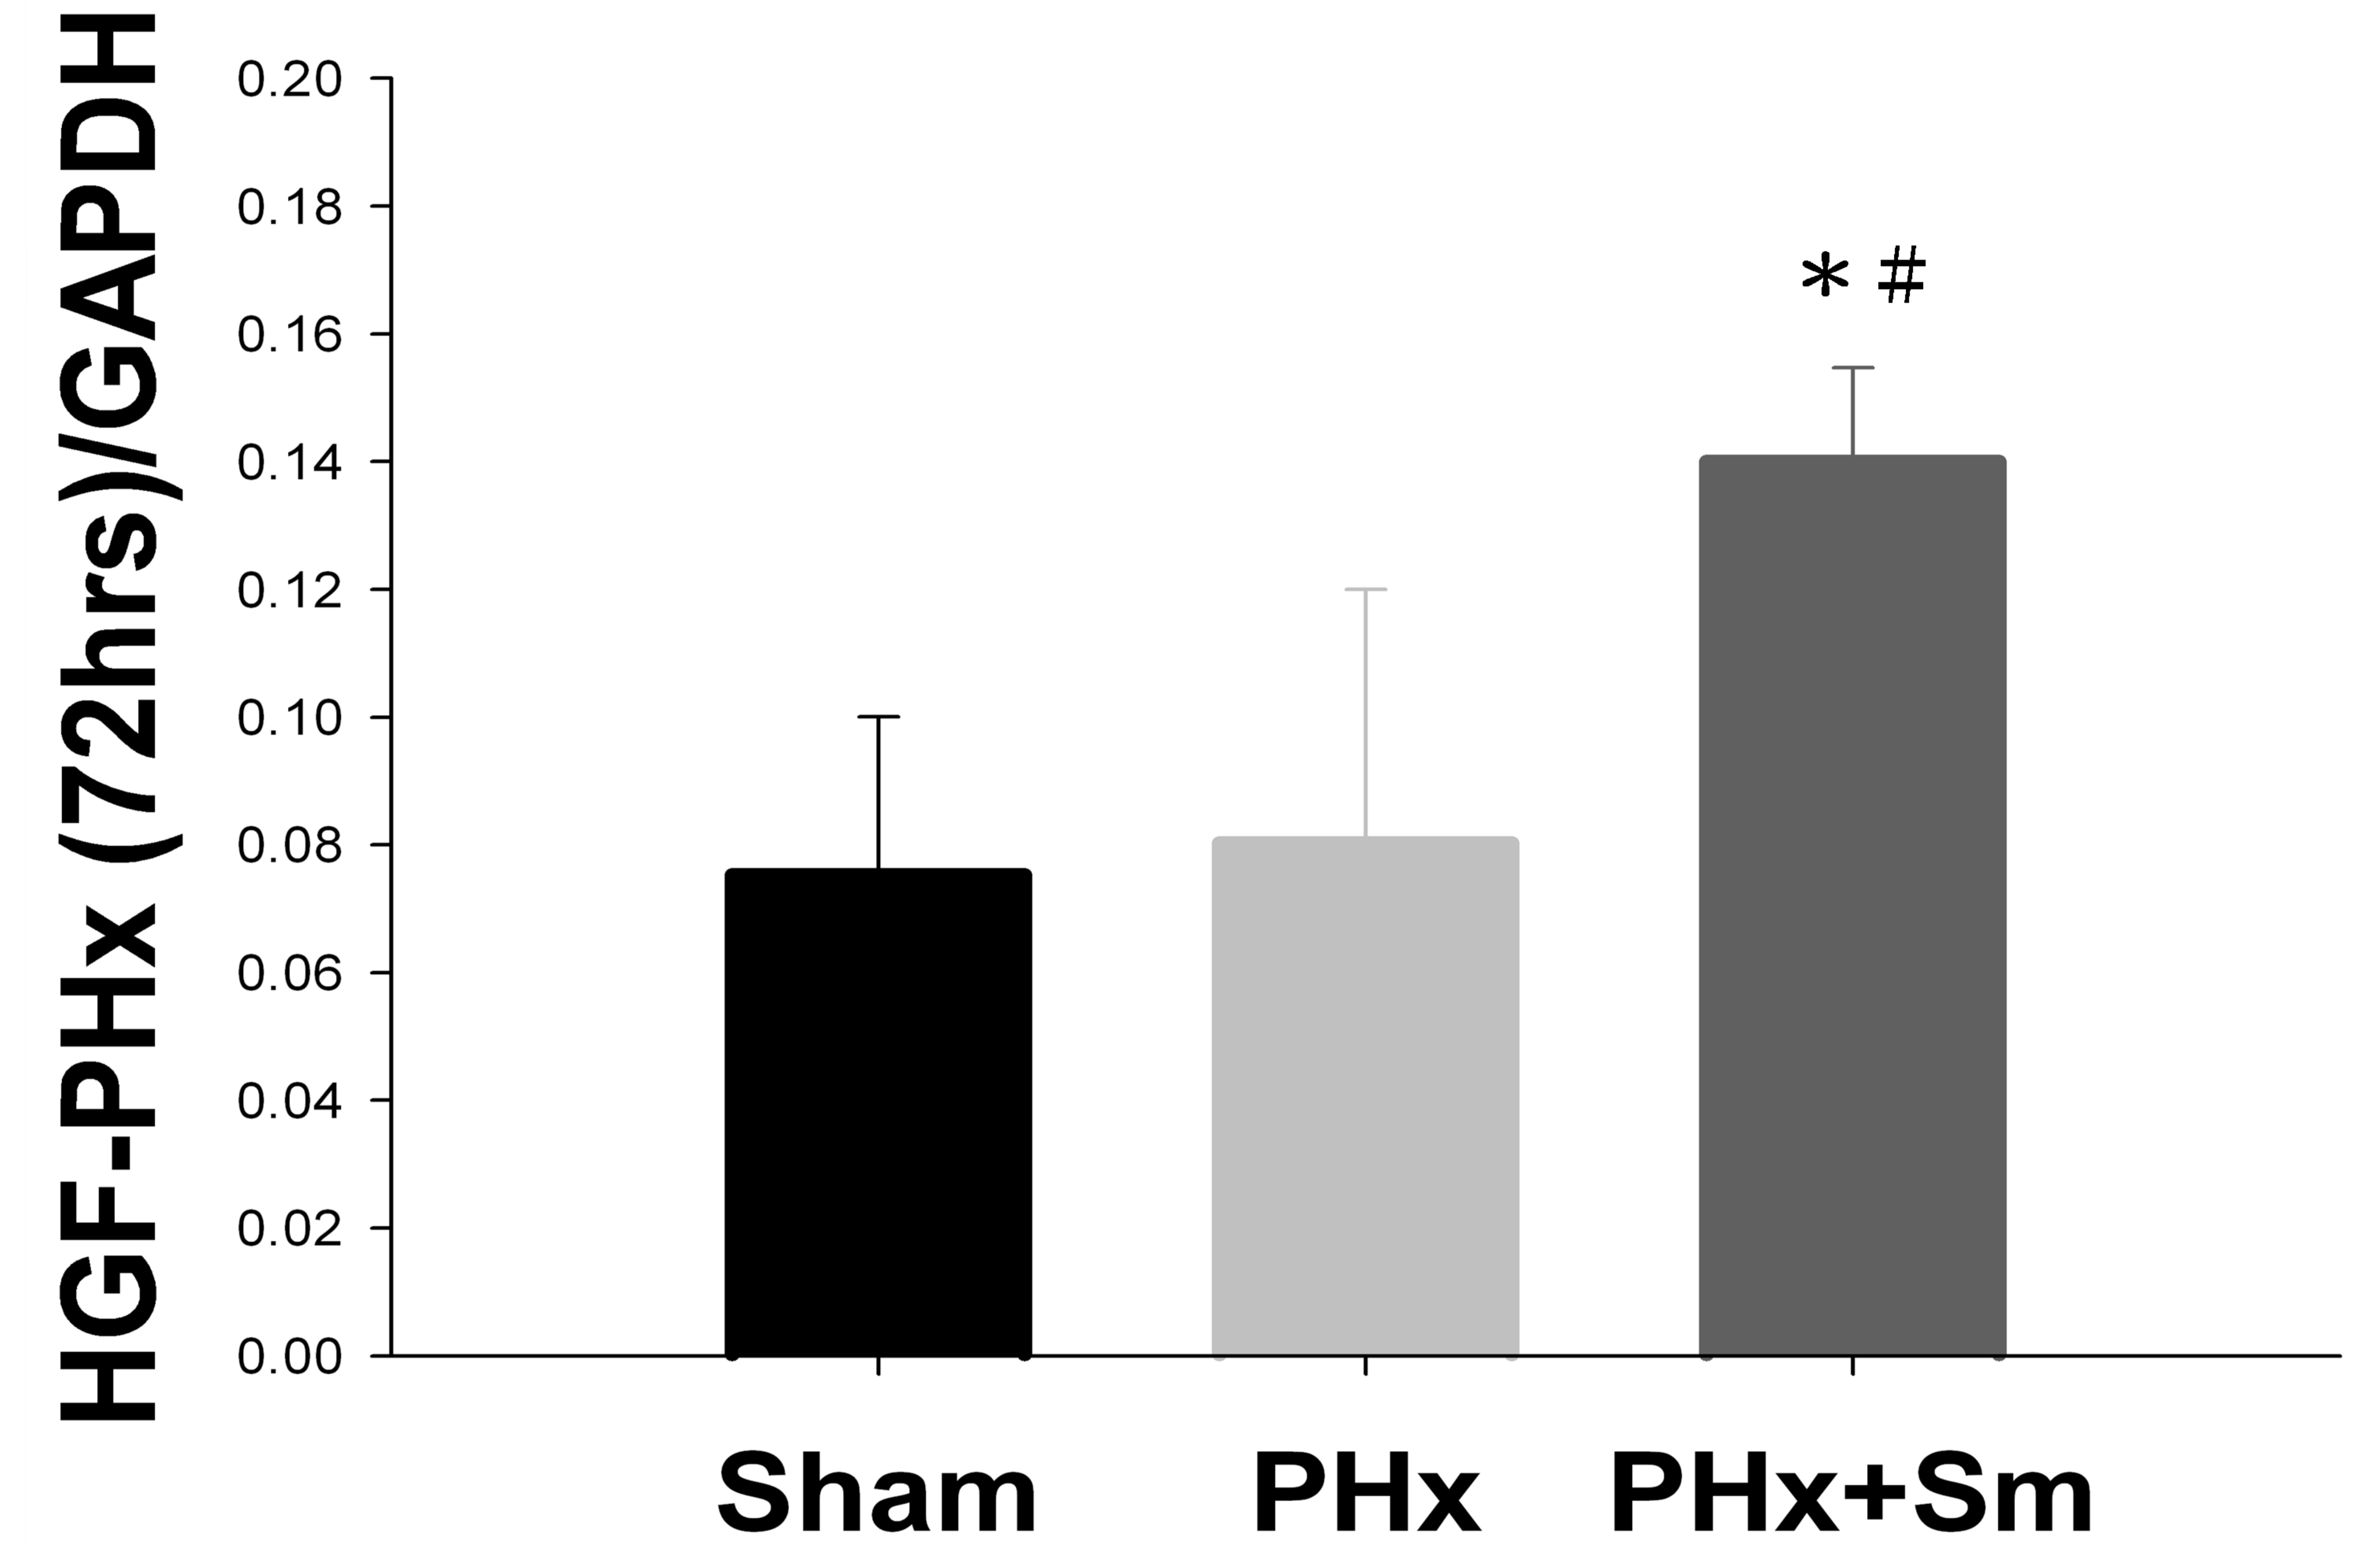

## HGF 72hrs PHx Protein expression

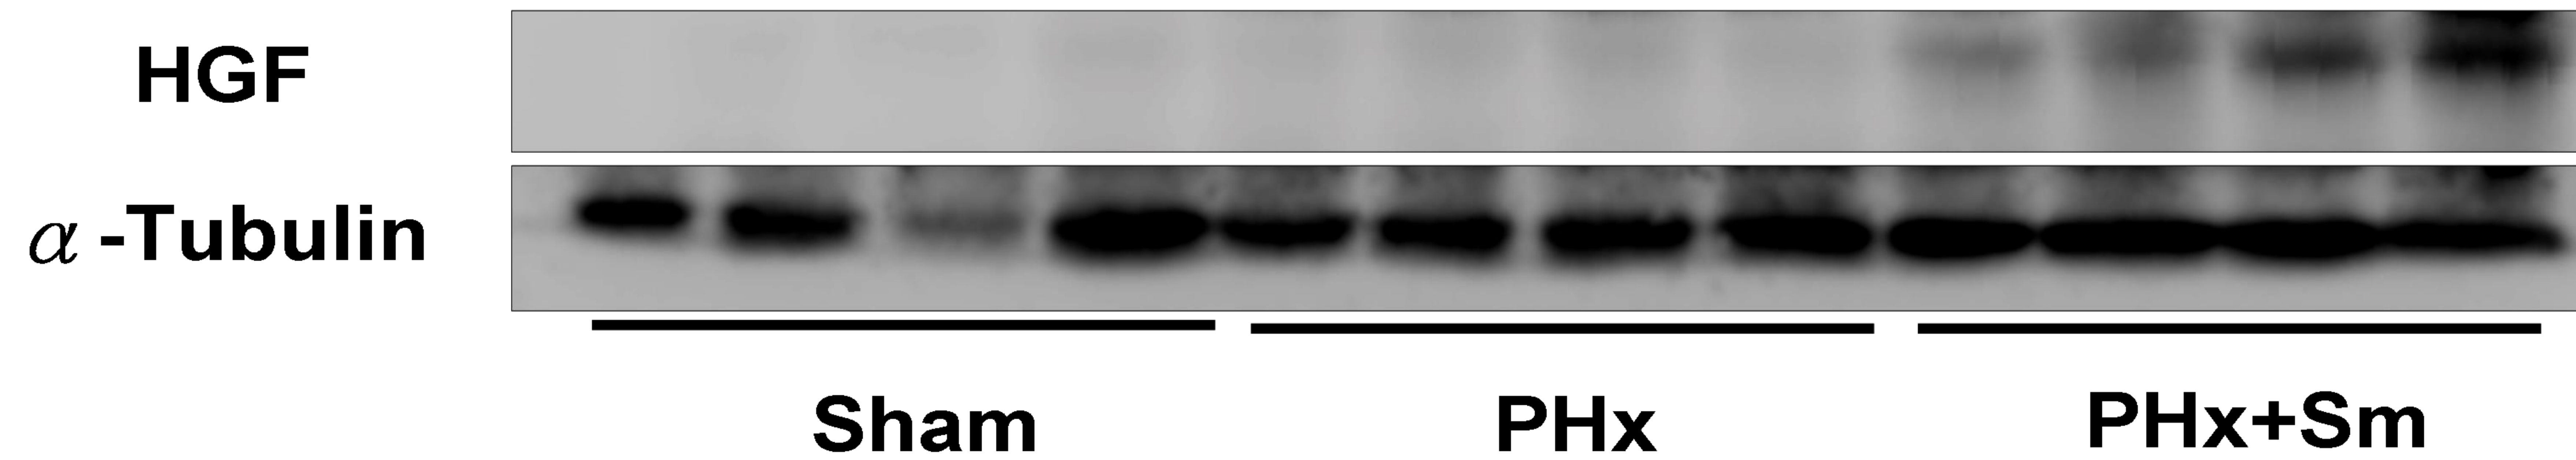

## HGF 72hrs PHx mRNA expression

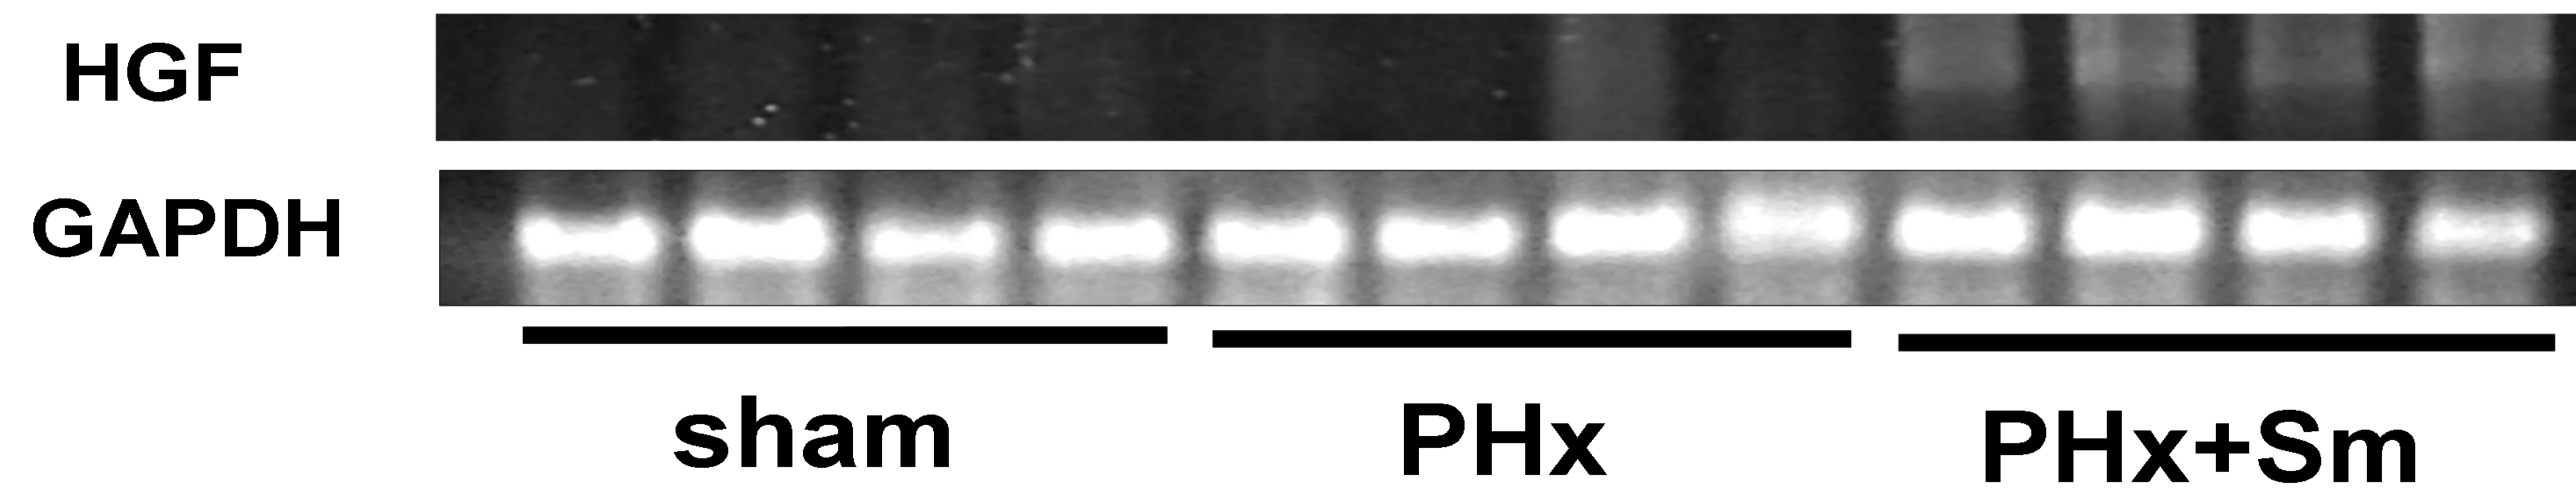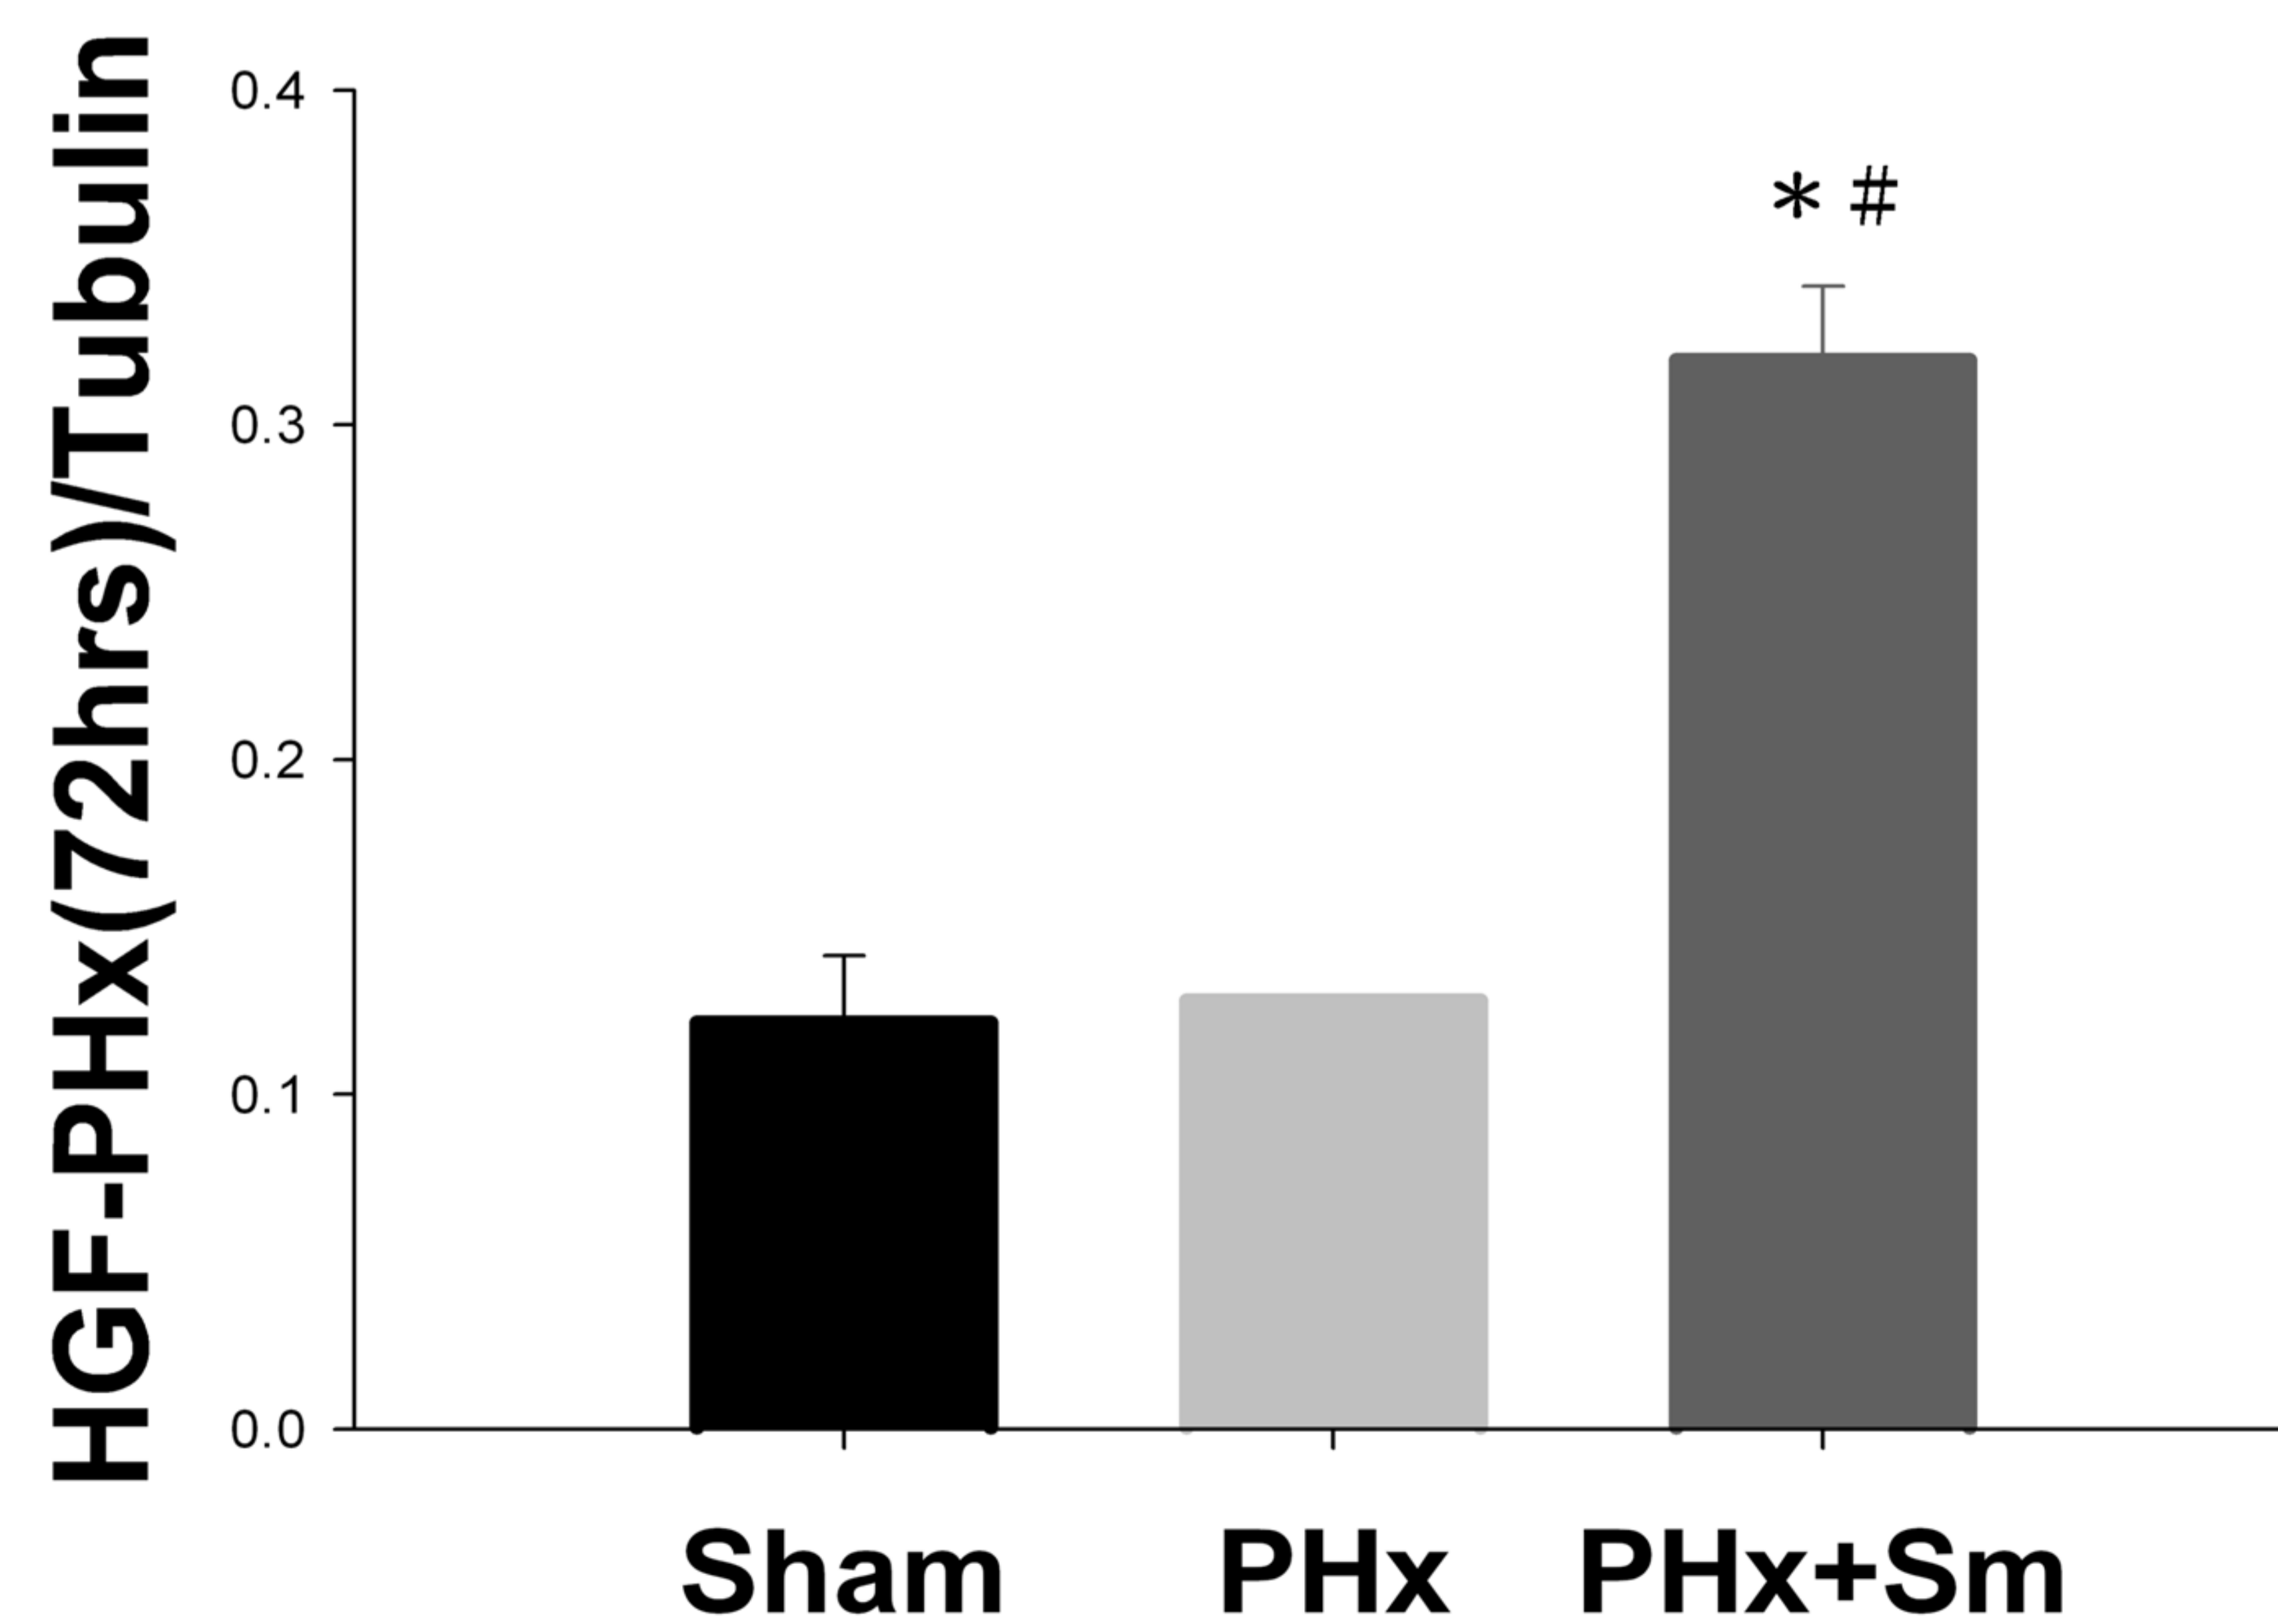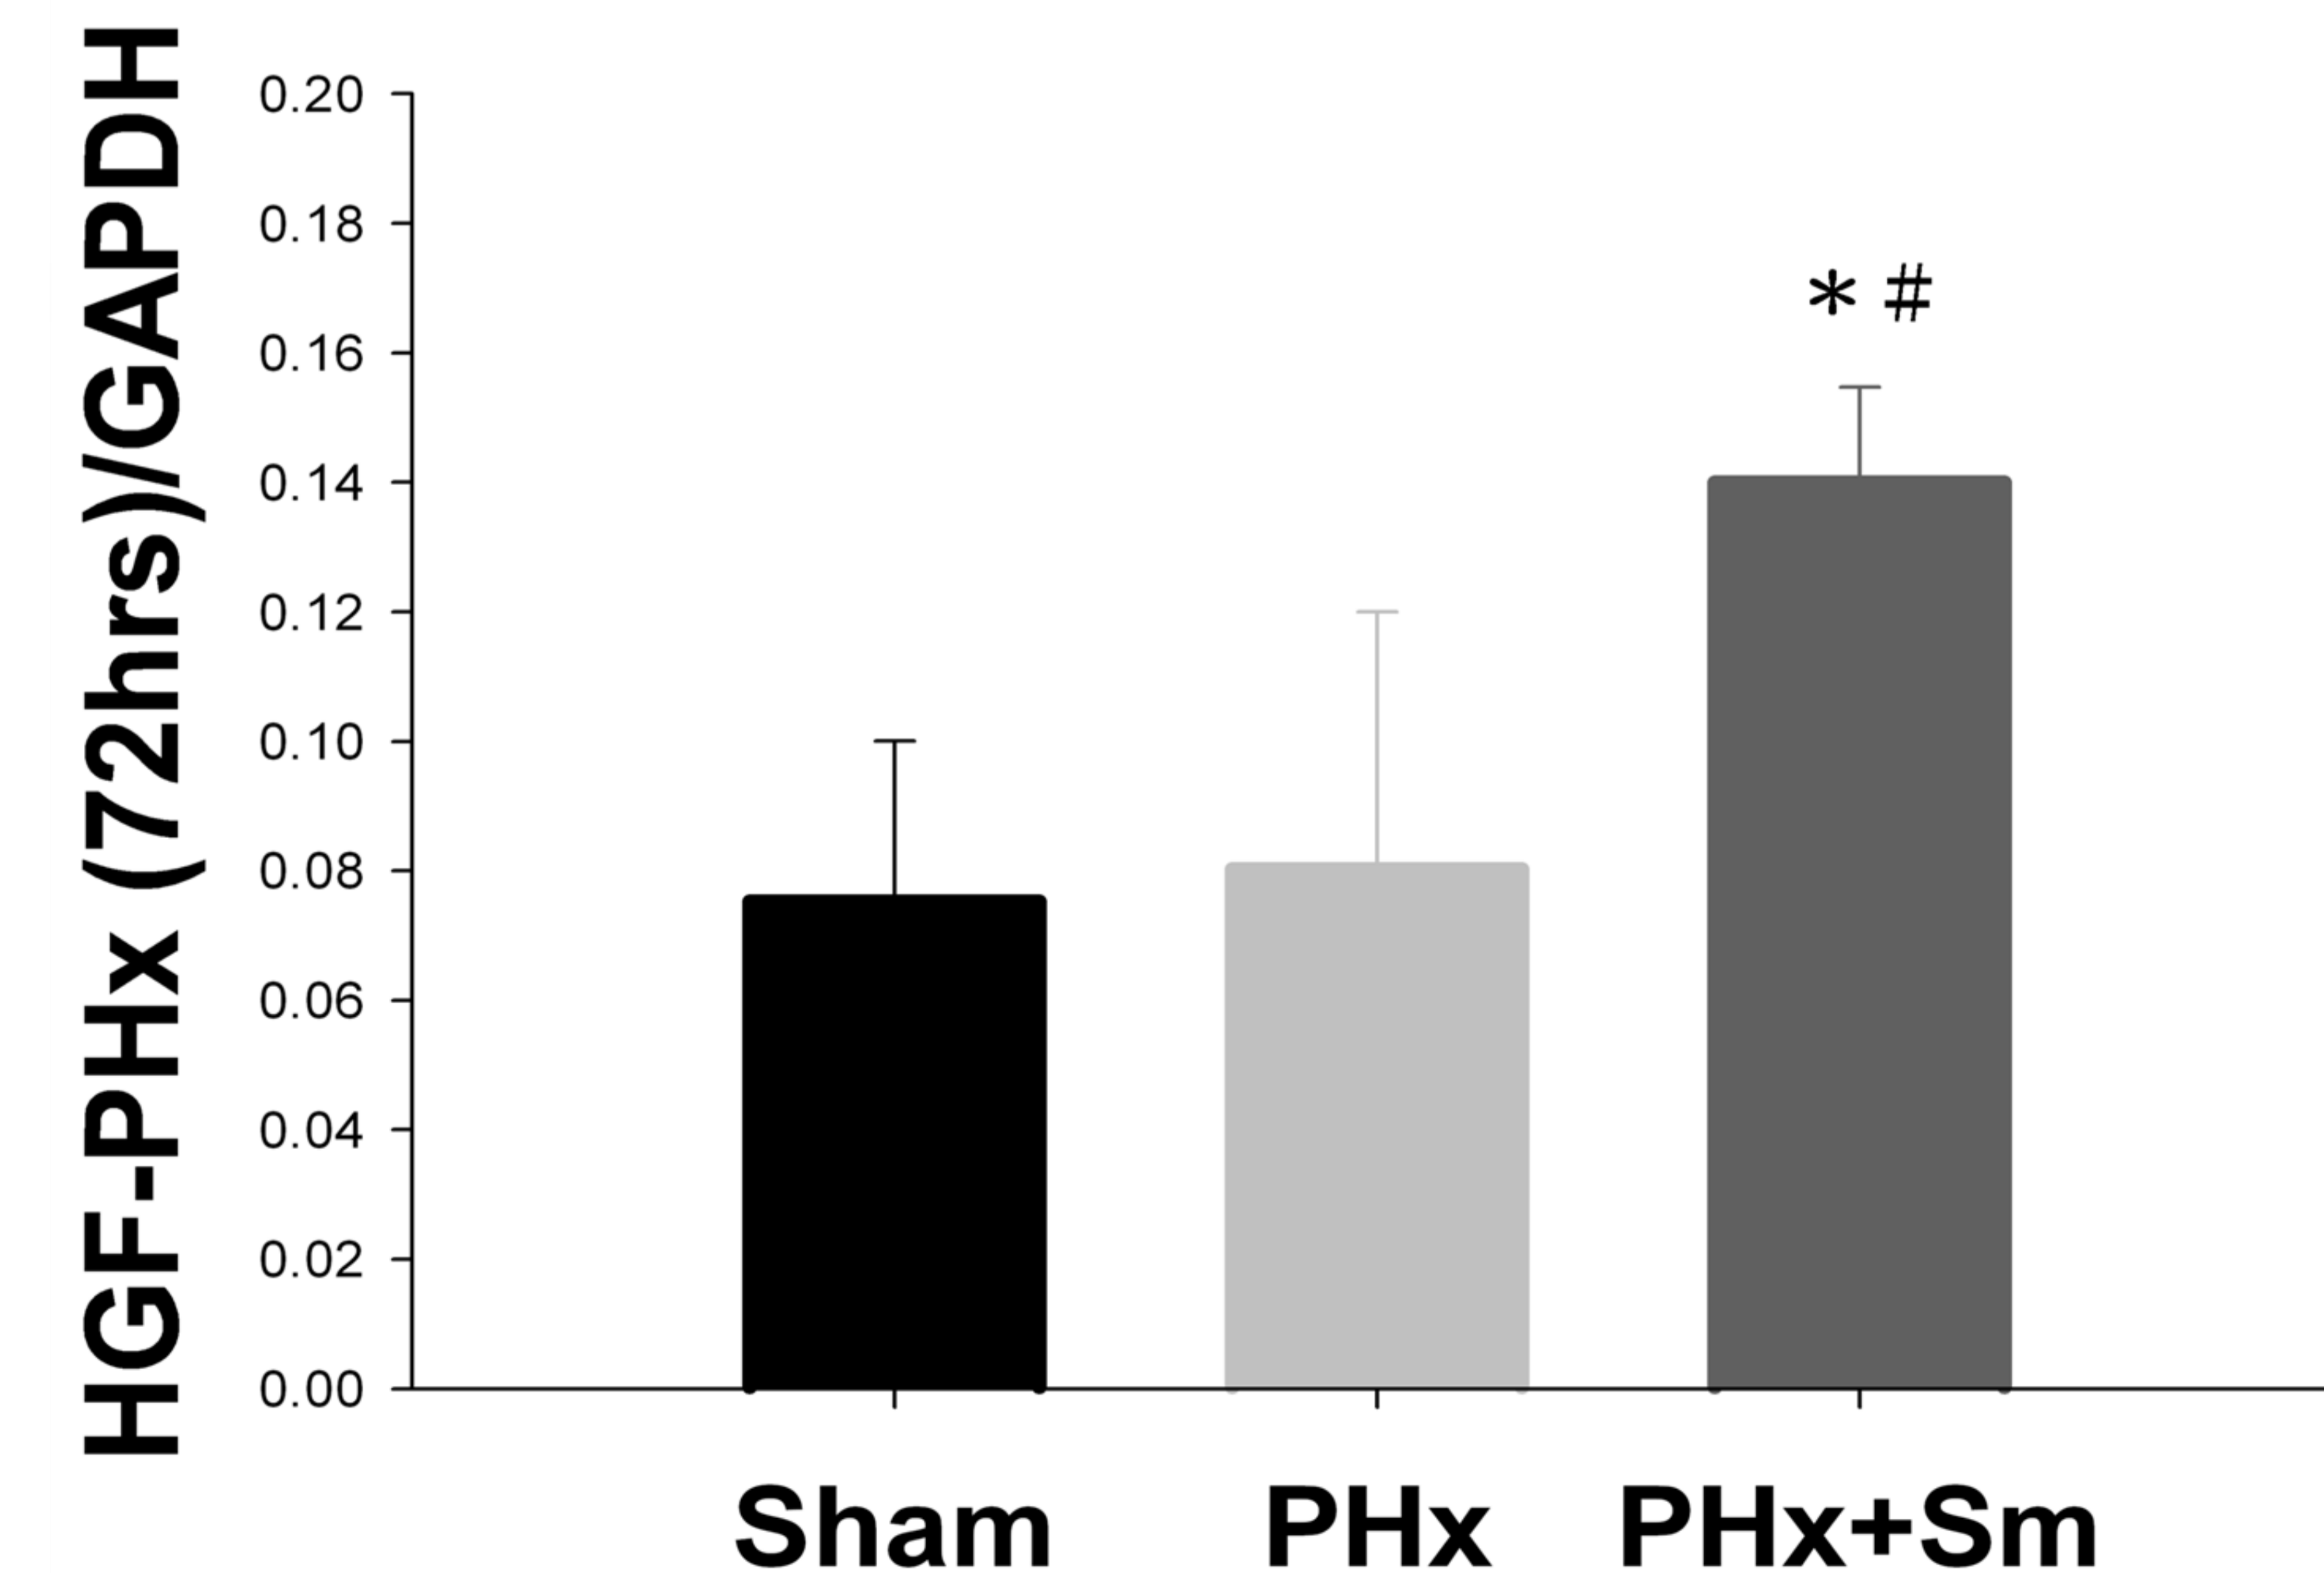

**A****HGF 6hrs PHx Protein expression**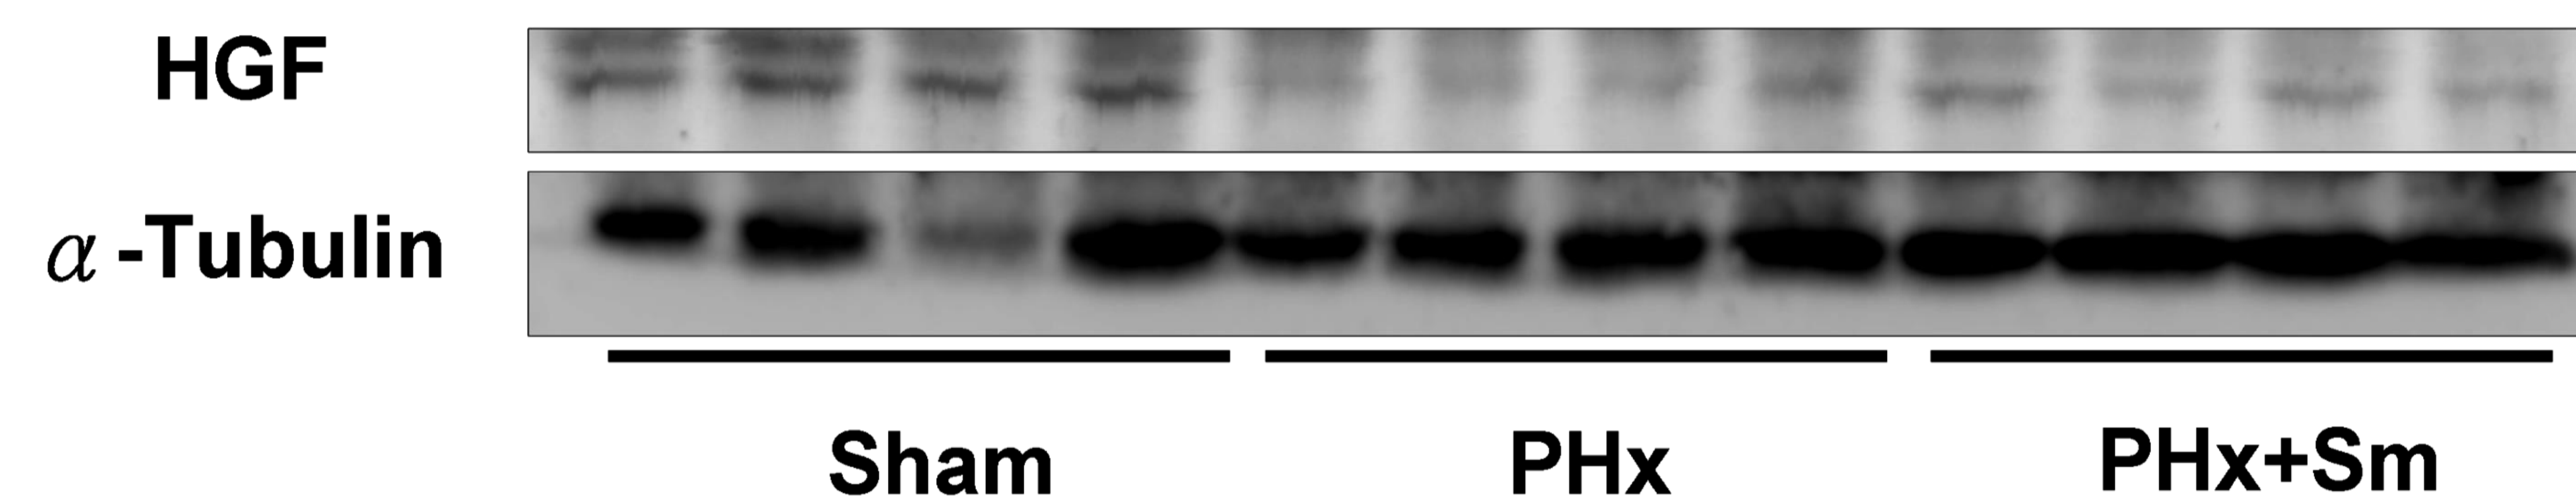**HGF 6hrs PHx mRNA expression**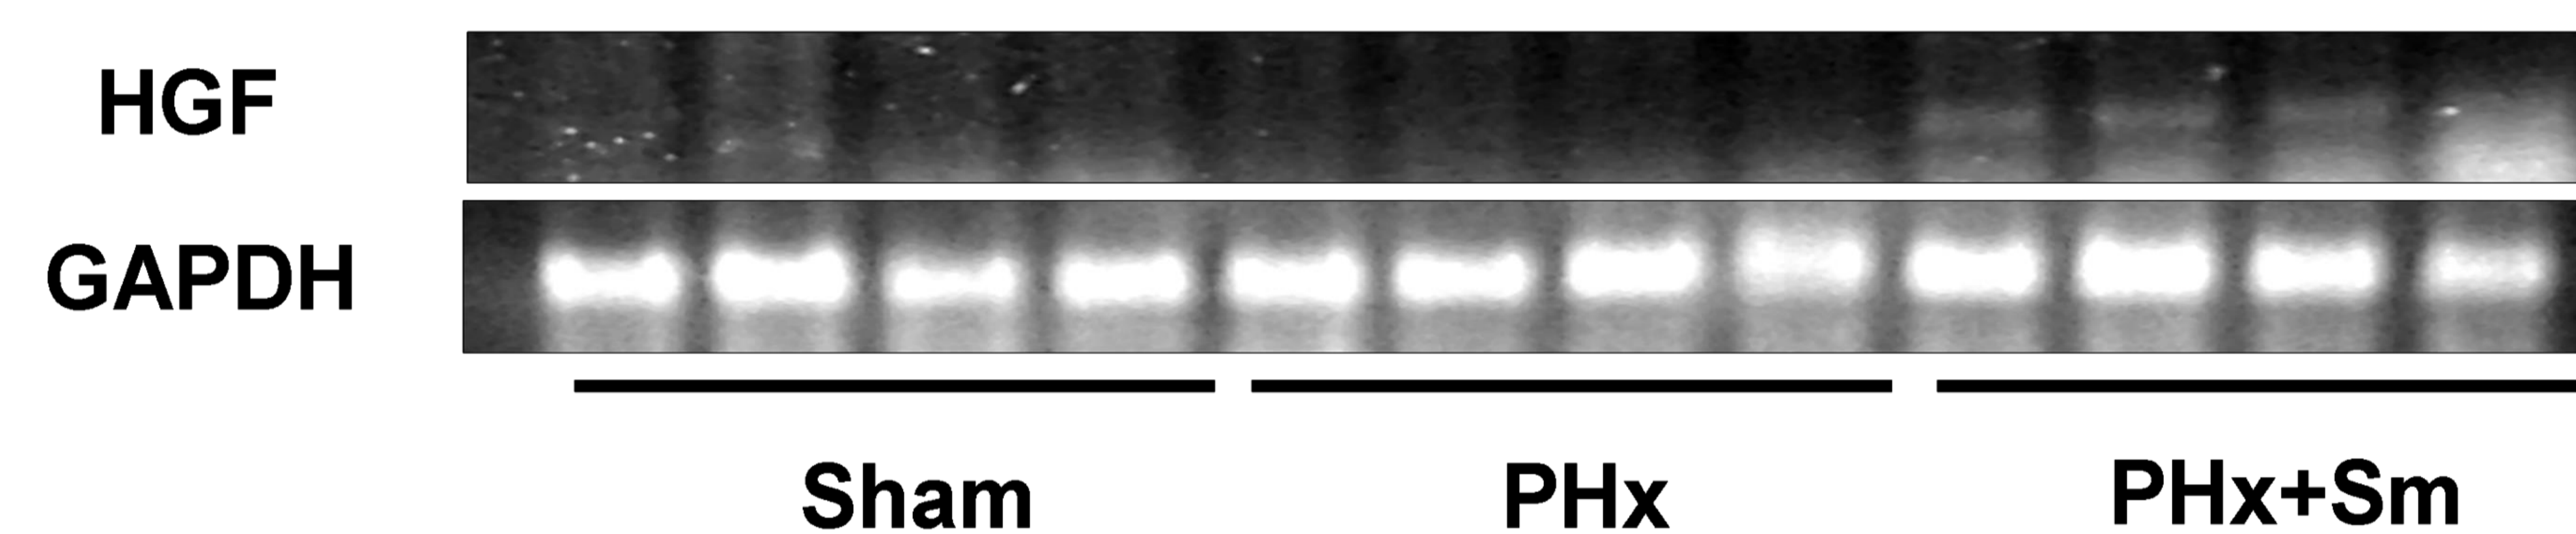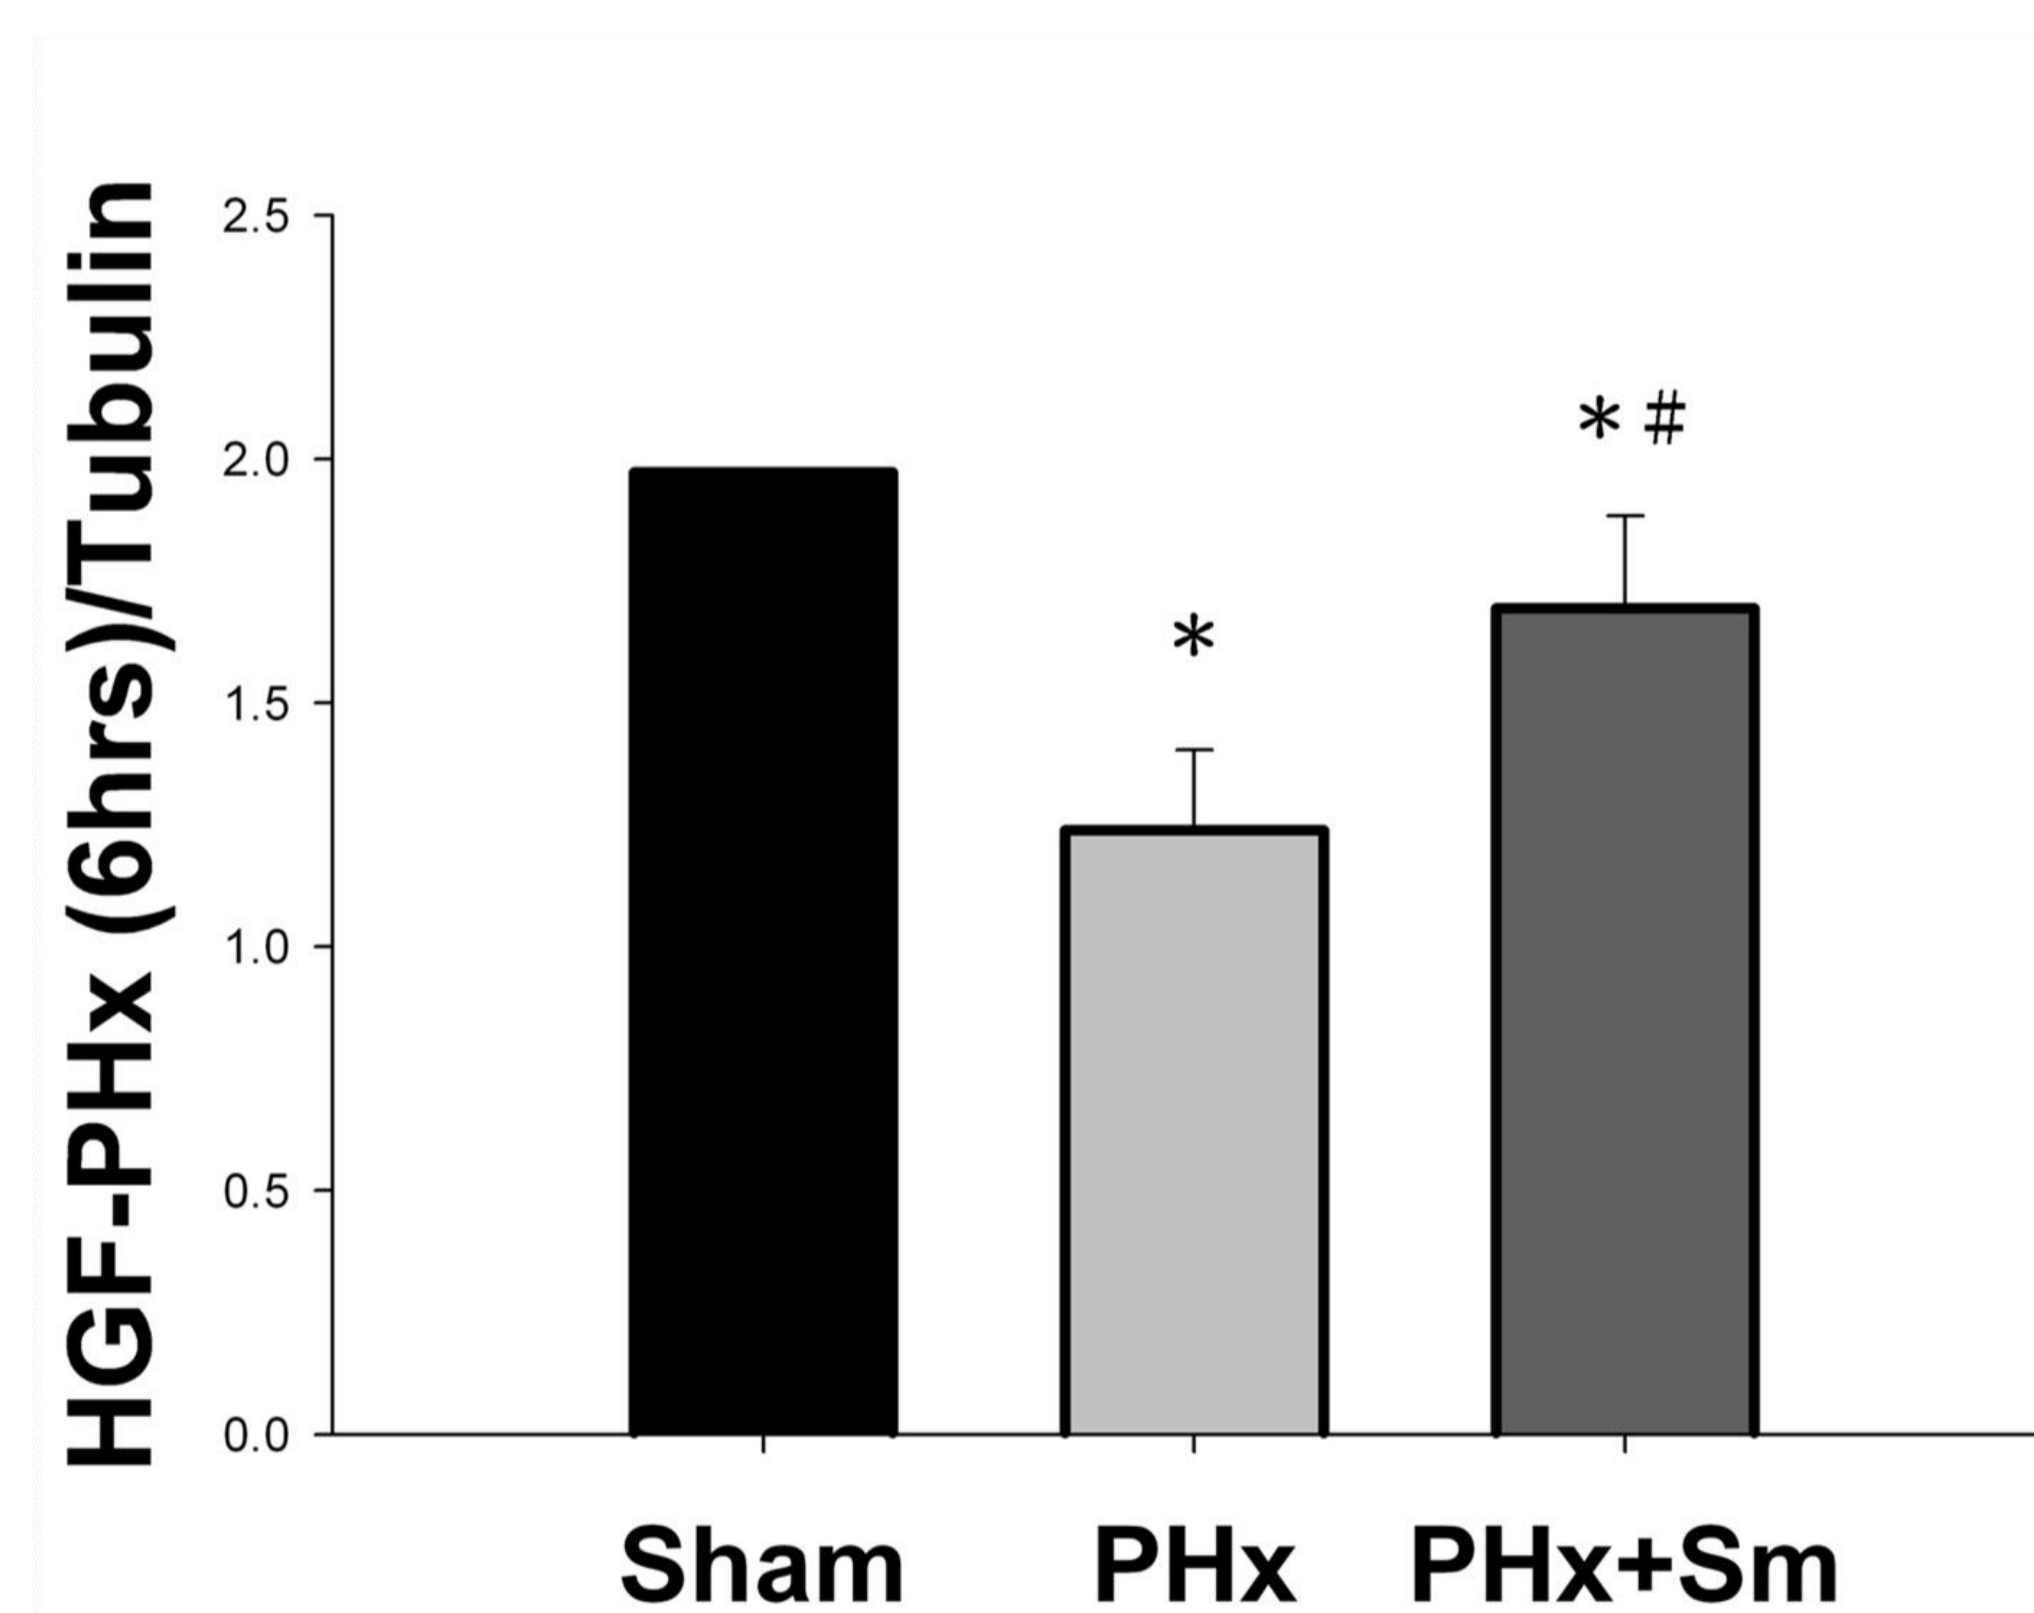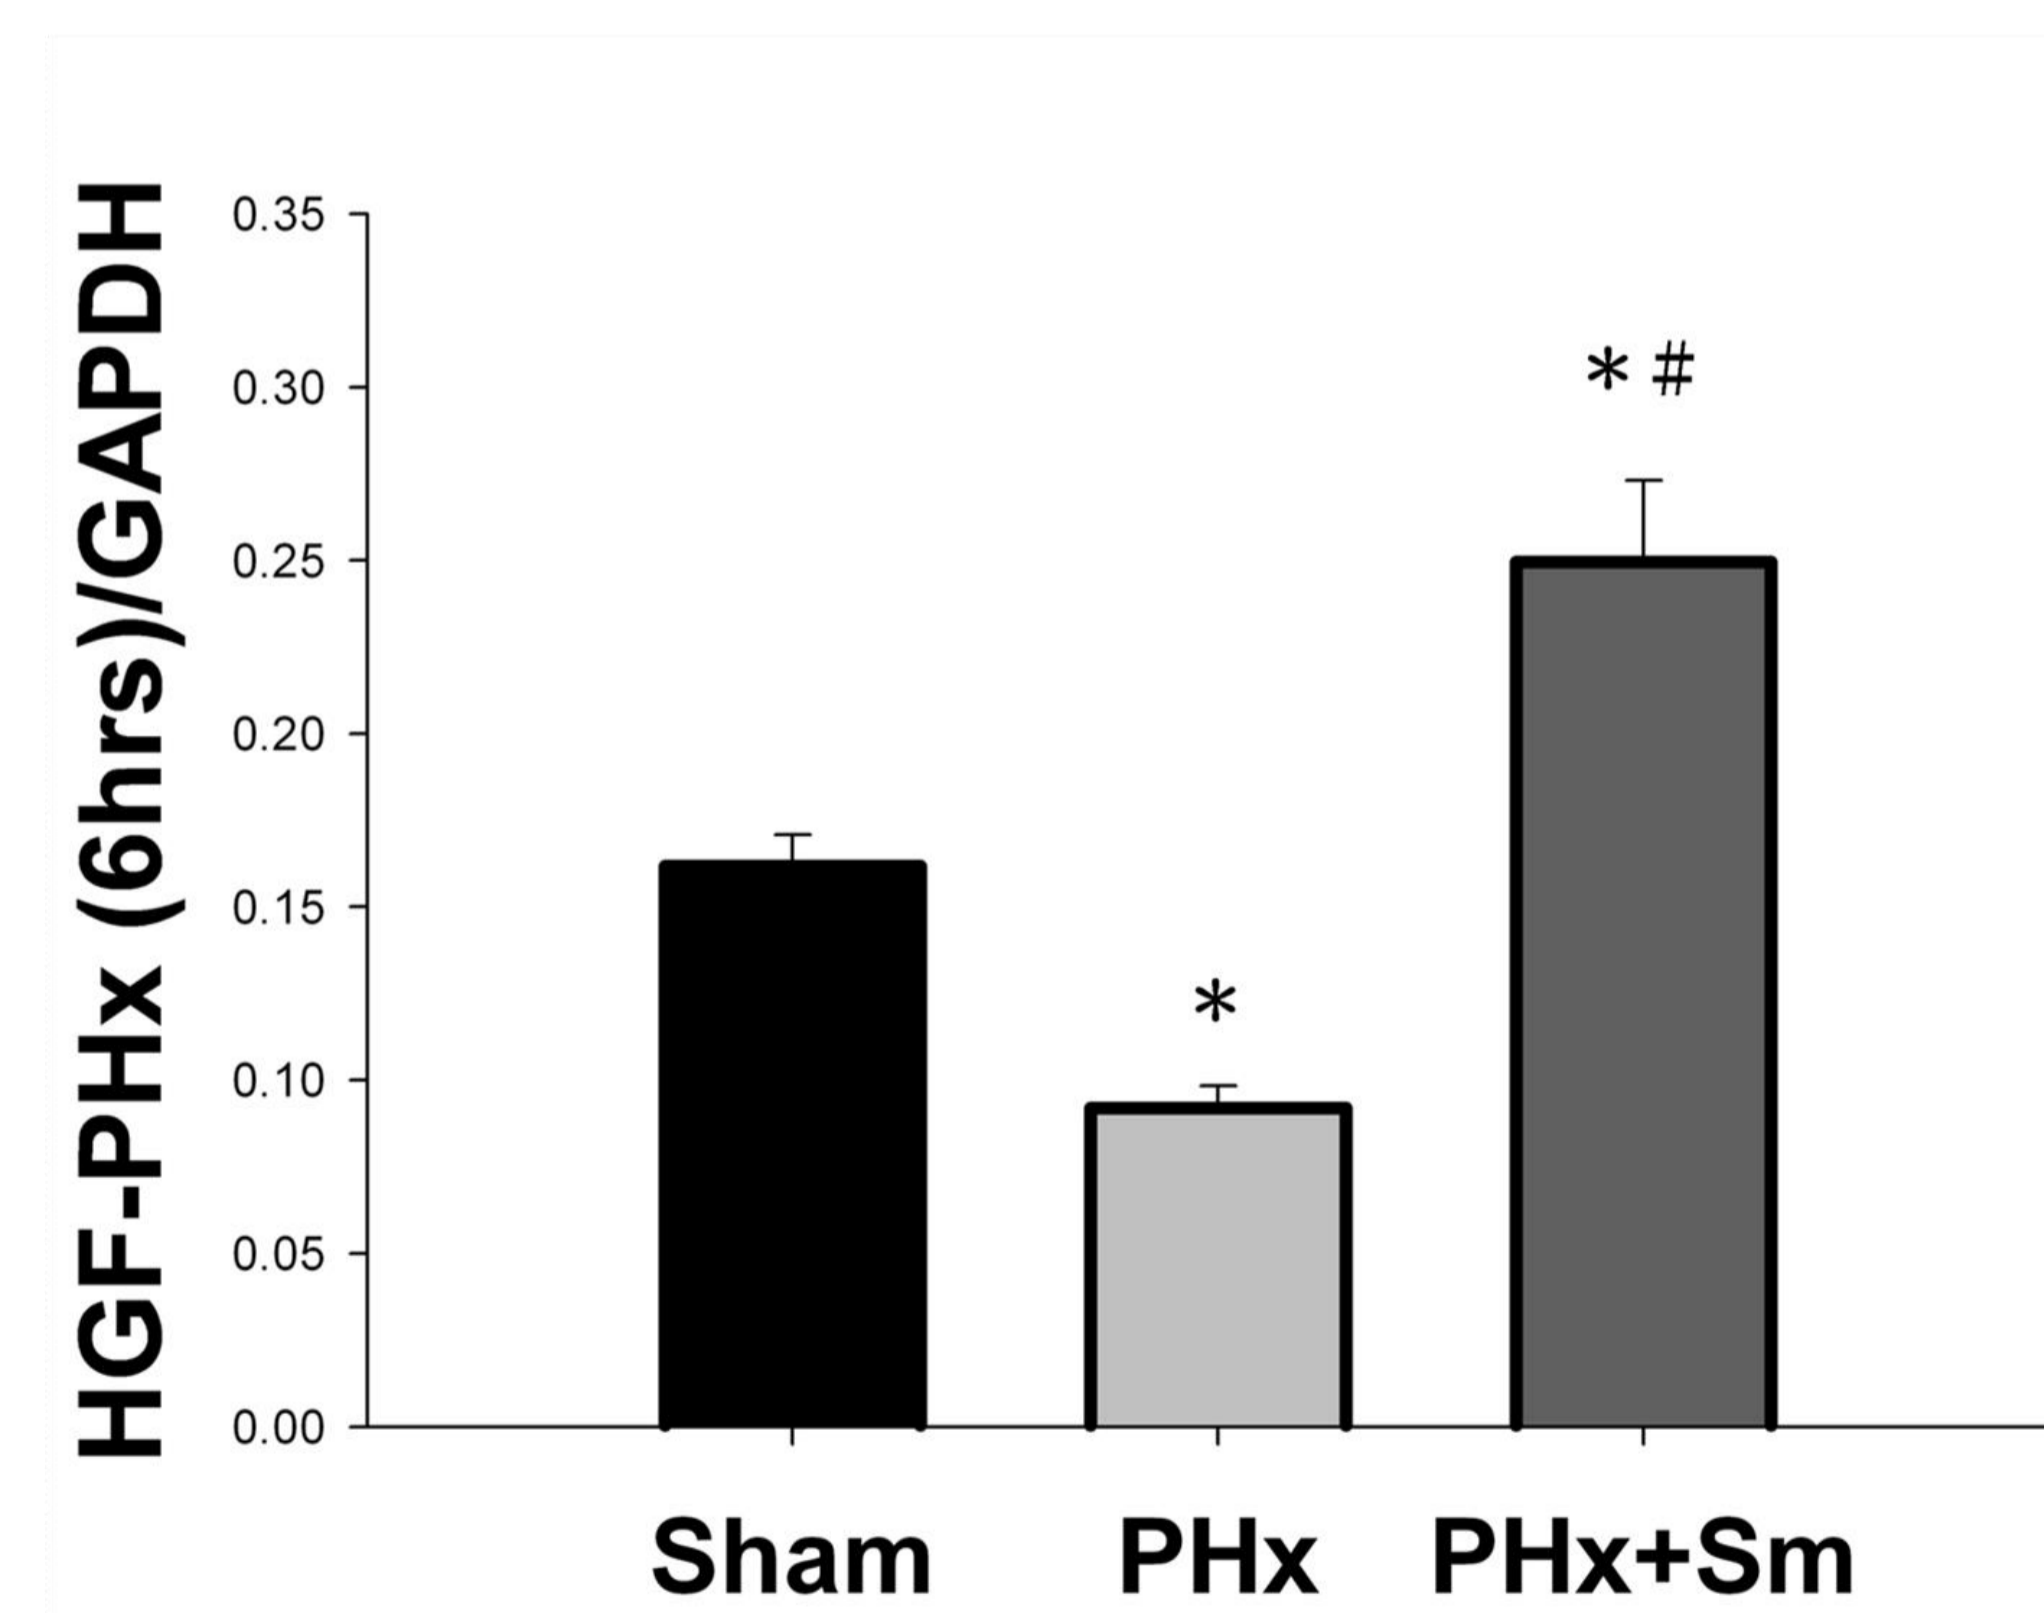**B****HGF 72hrs PHx Protein expression**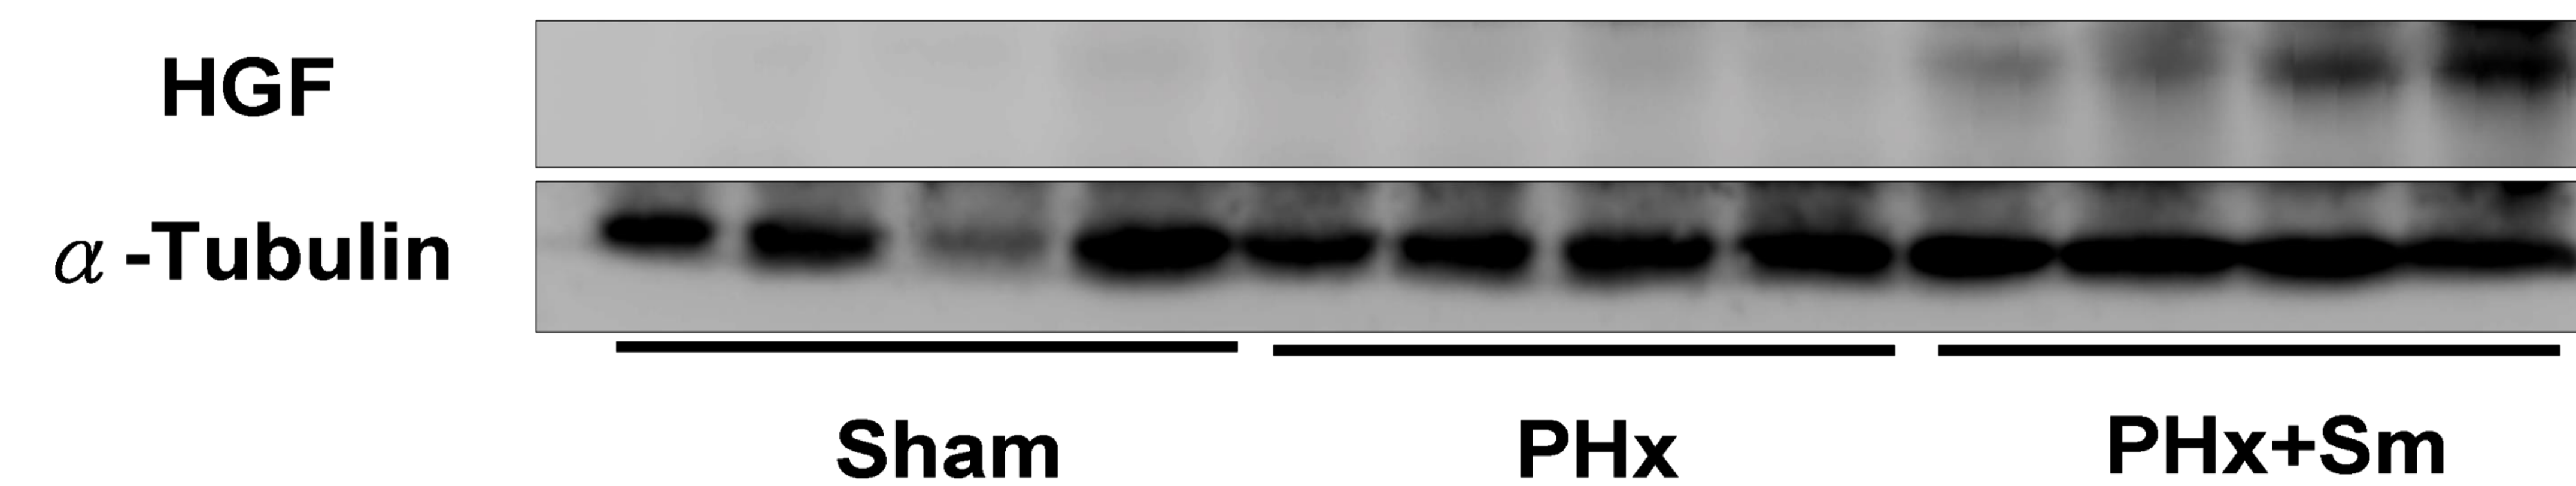**HGF 72hrs PHx mRNA expression**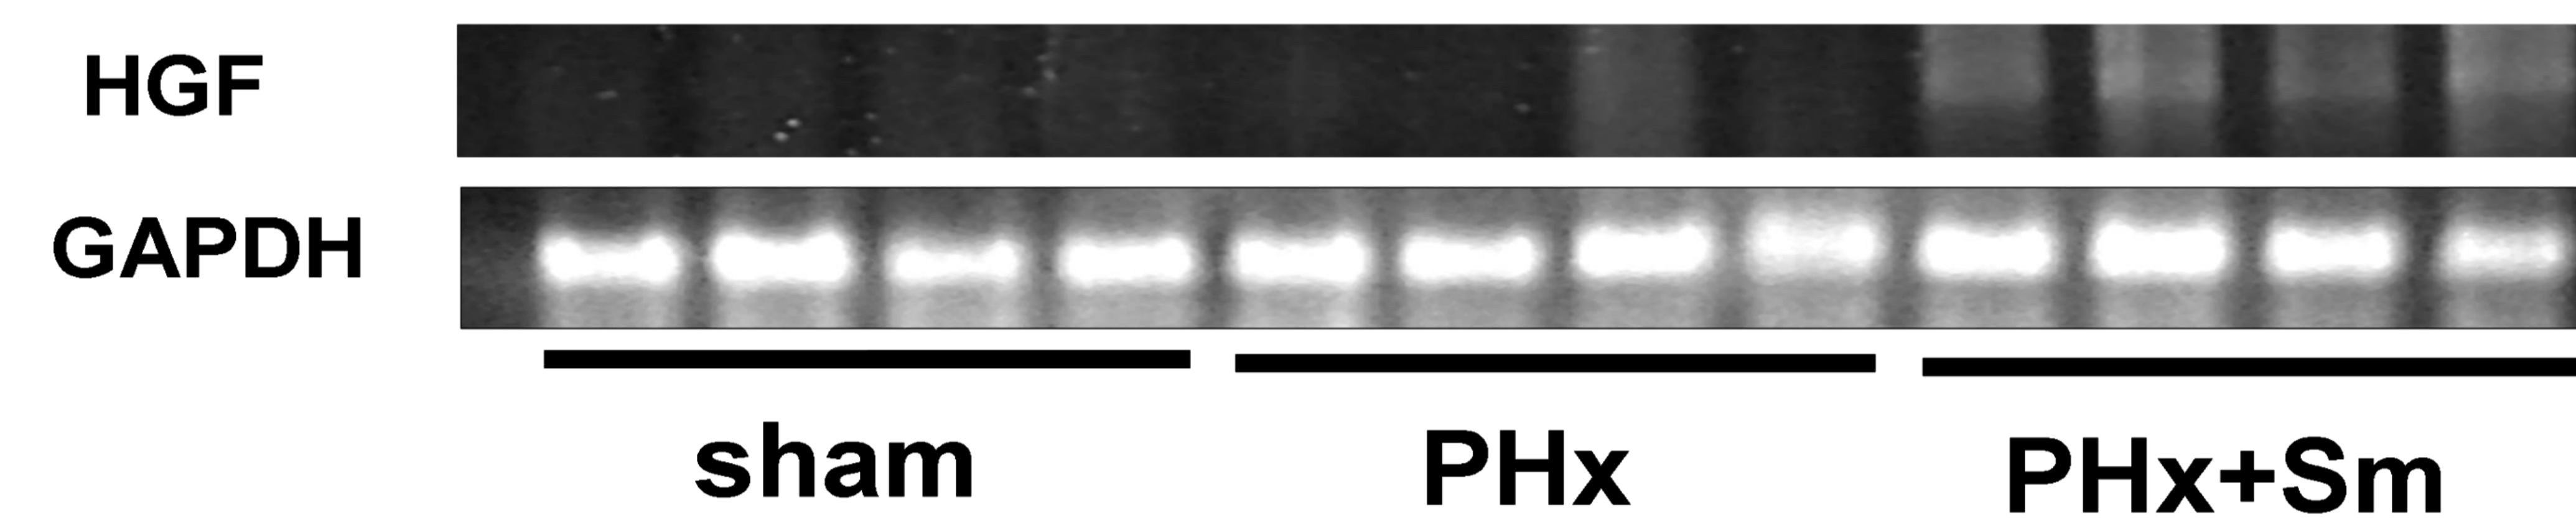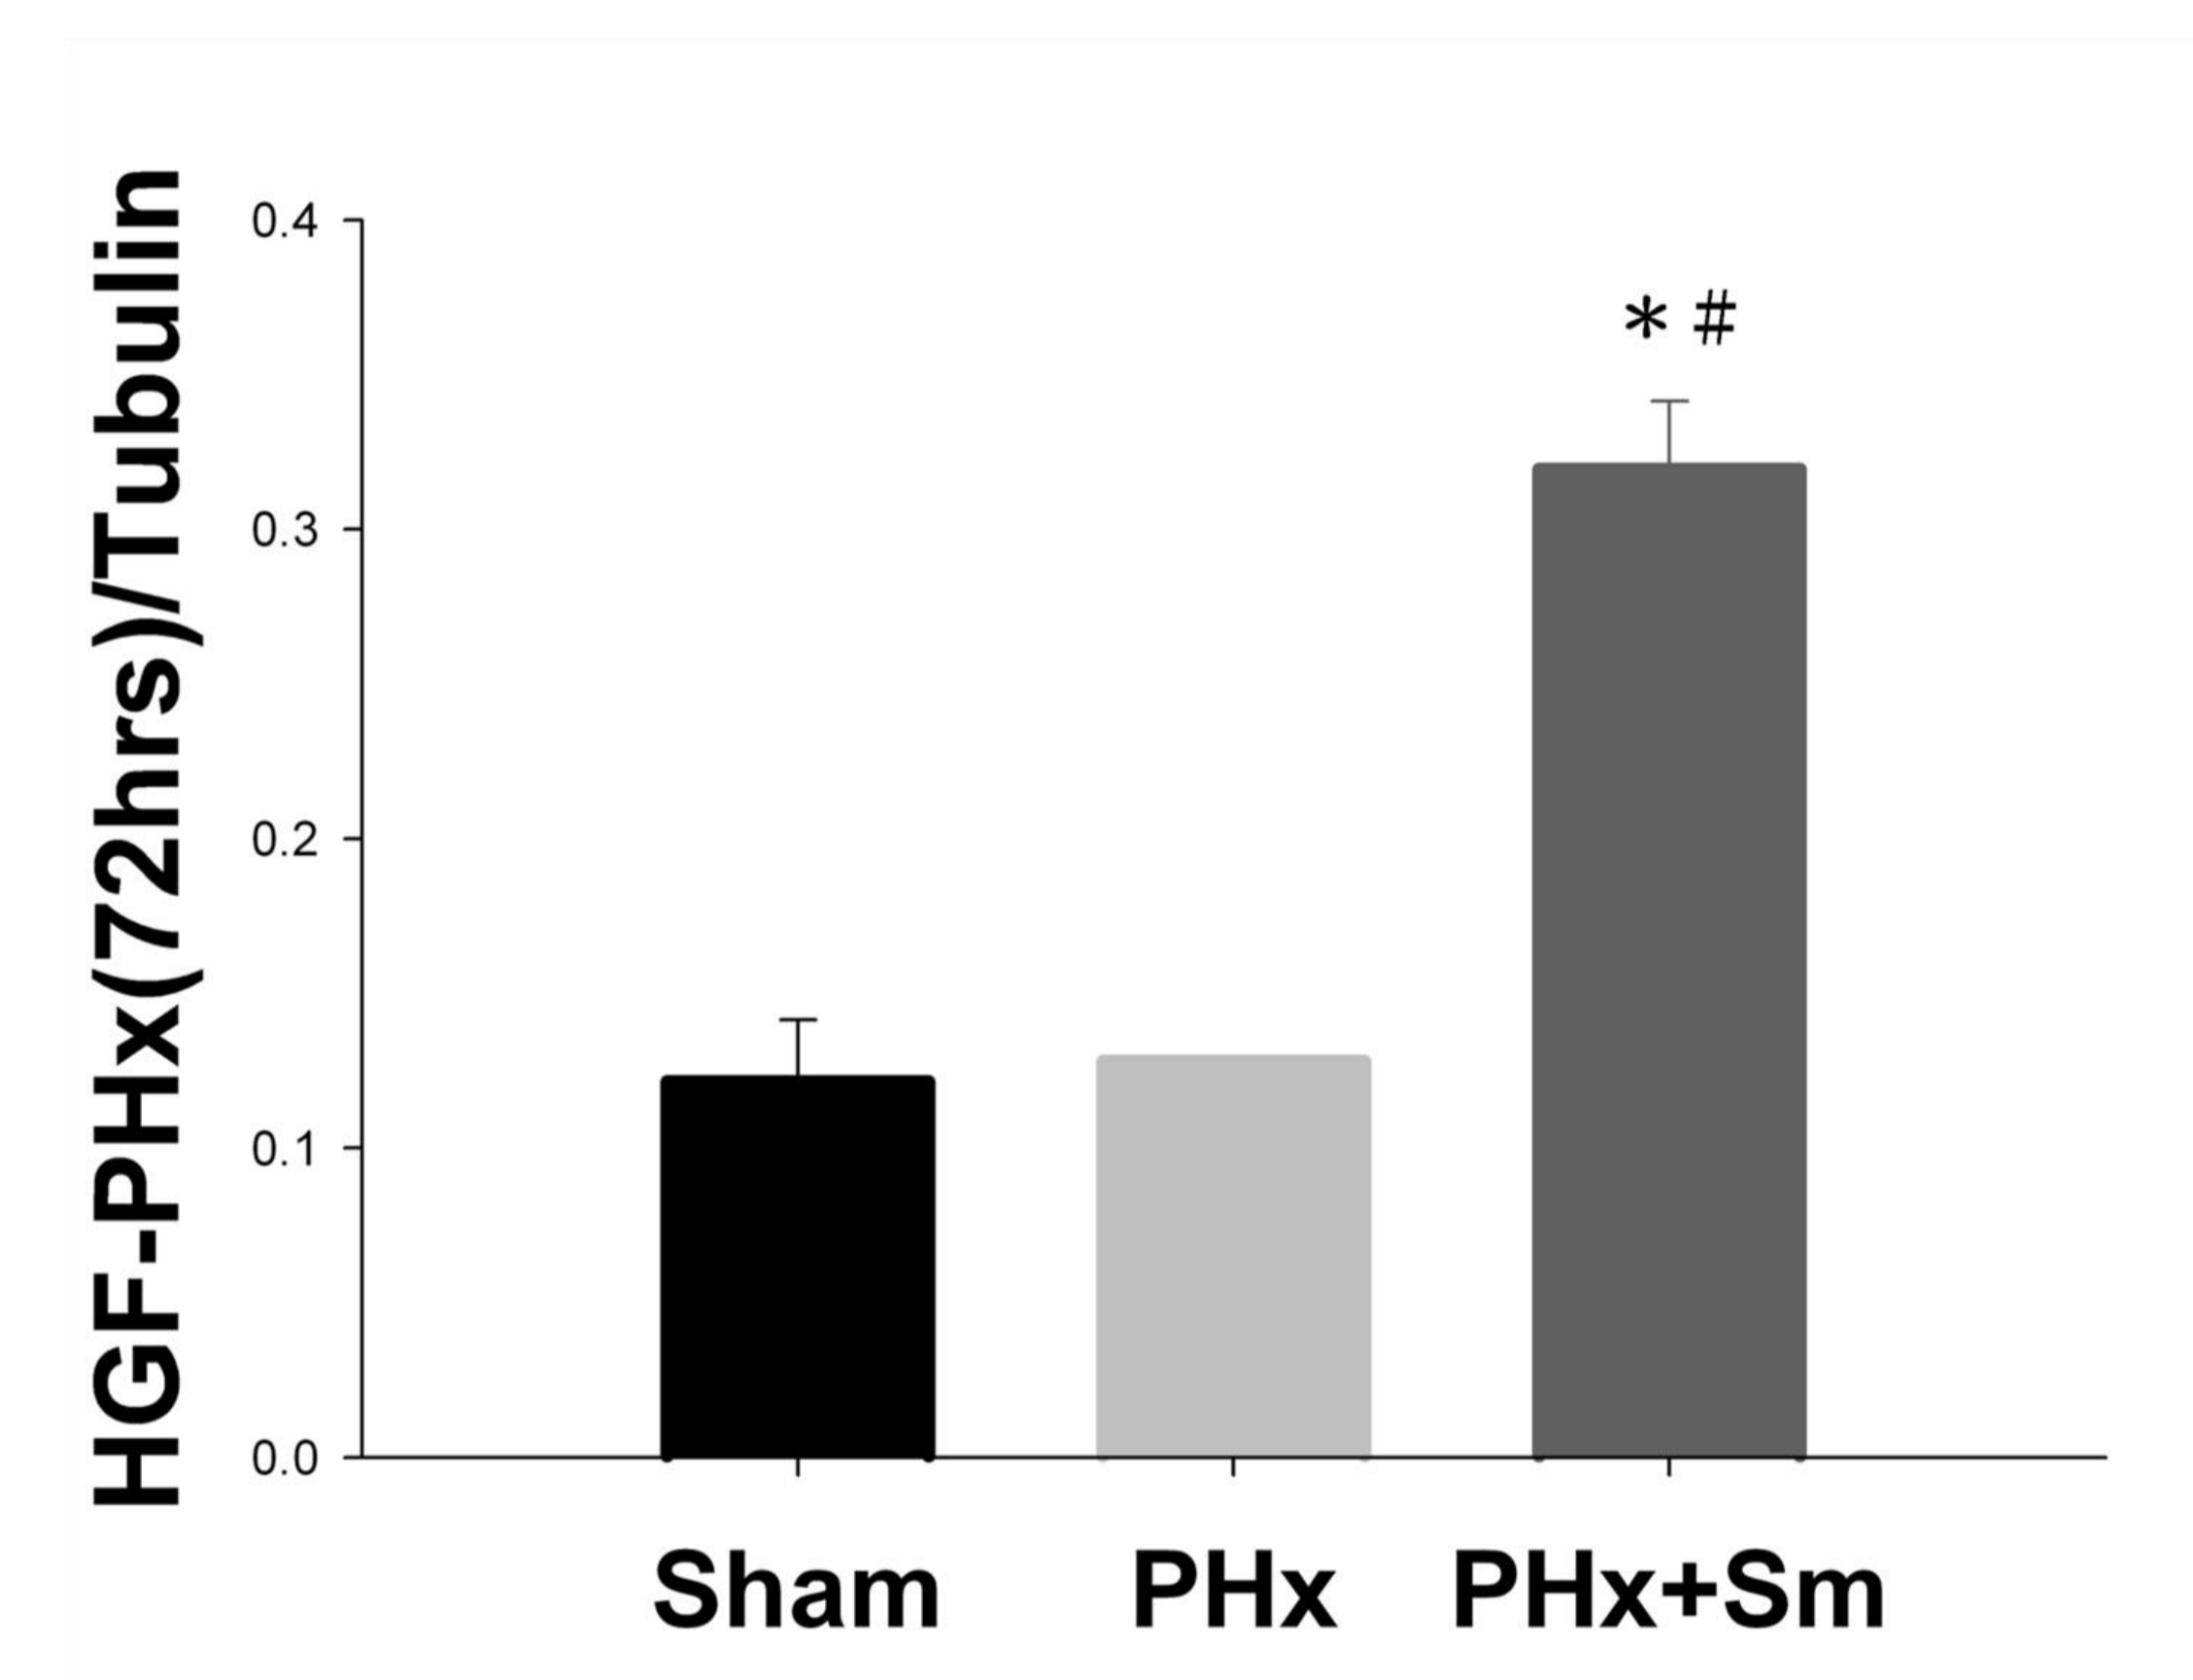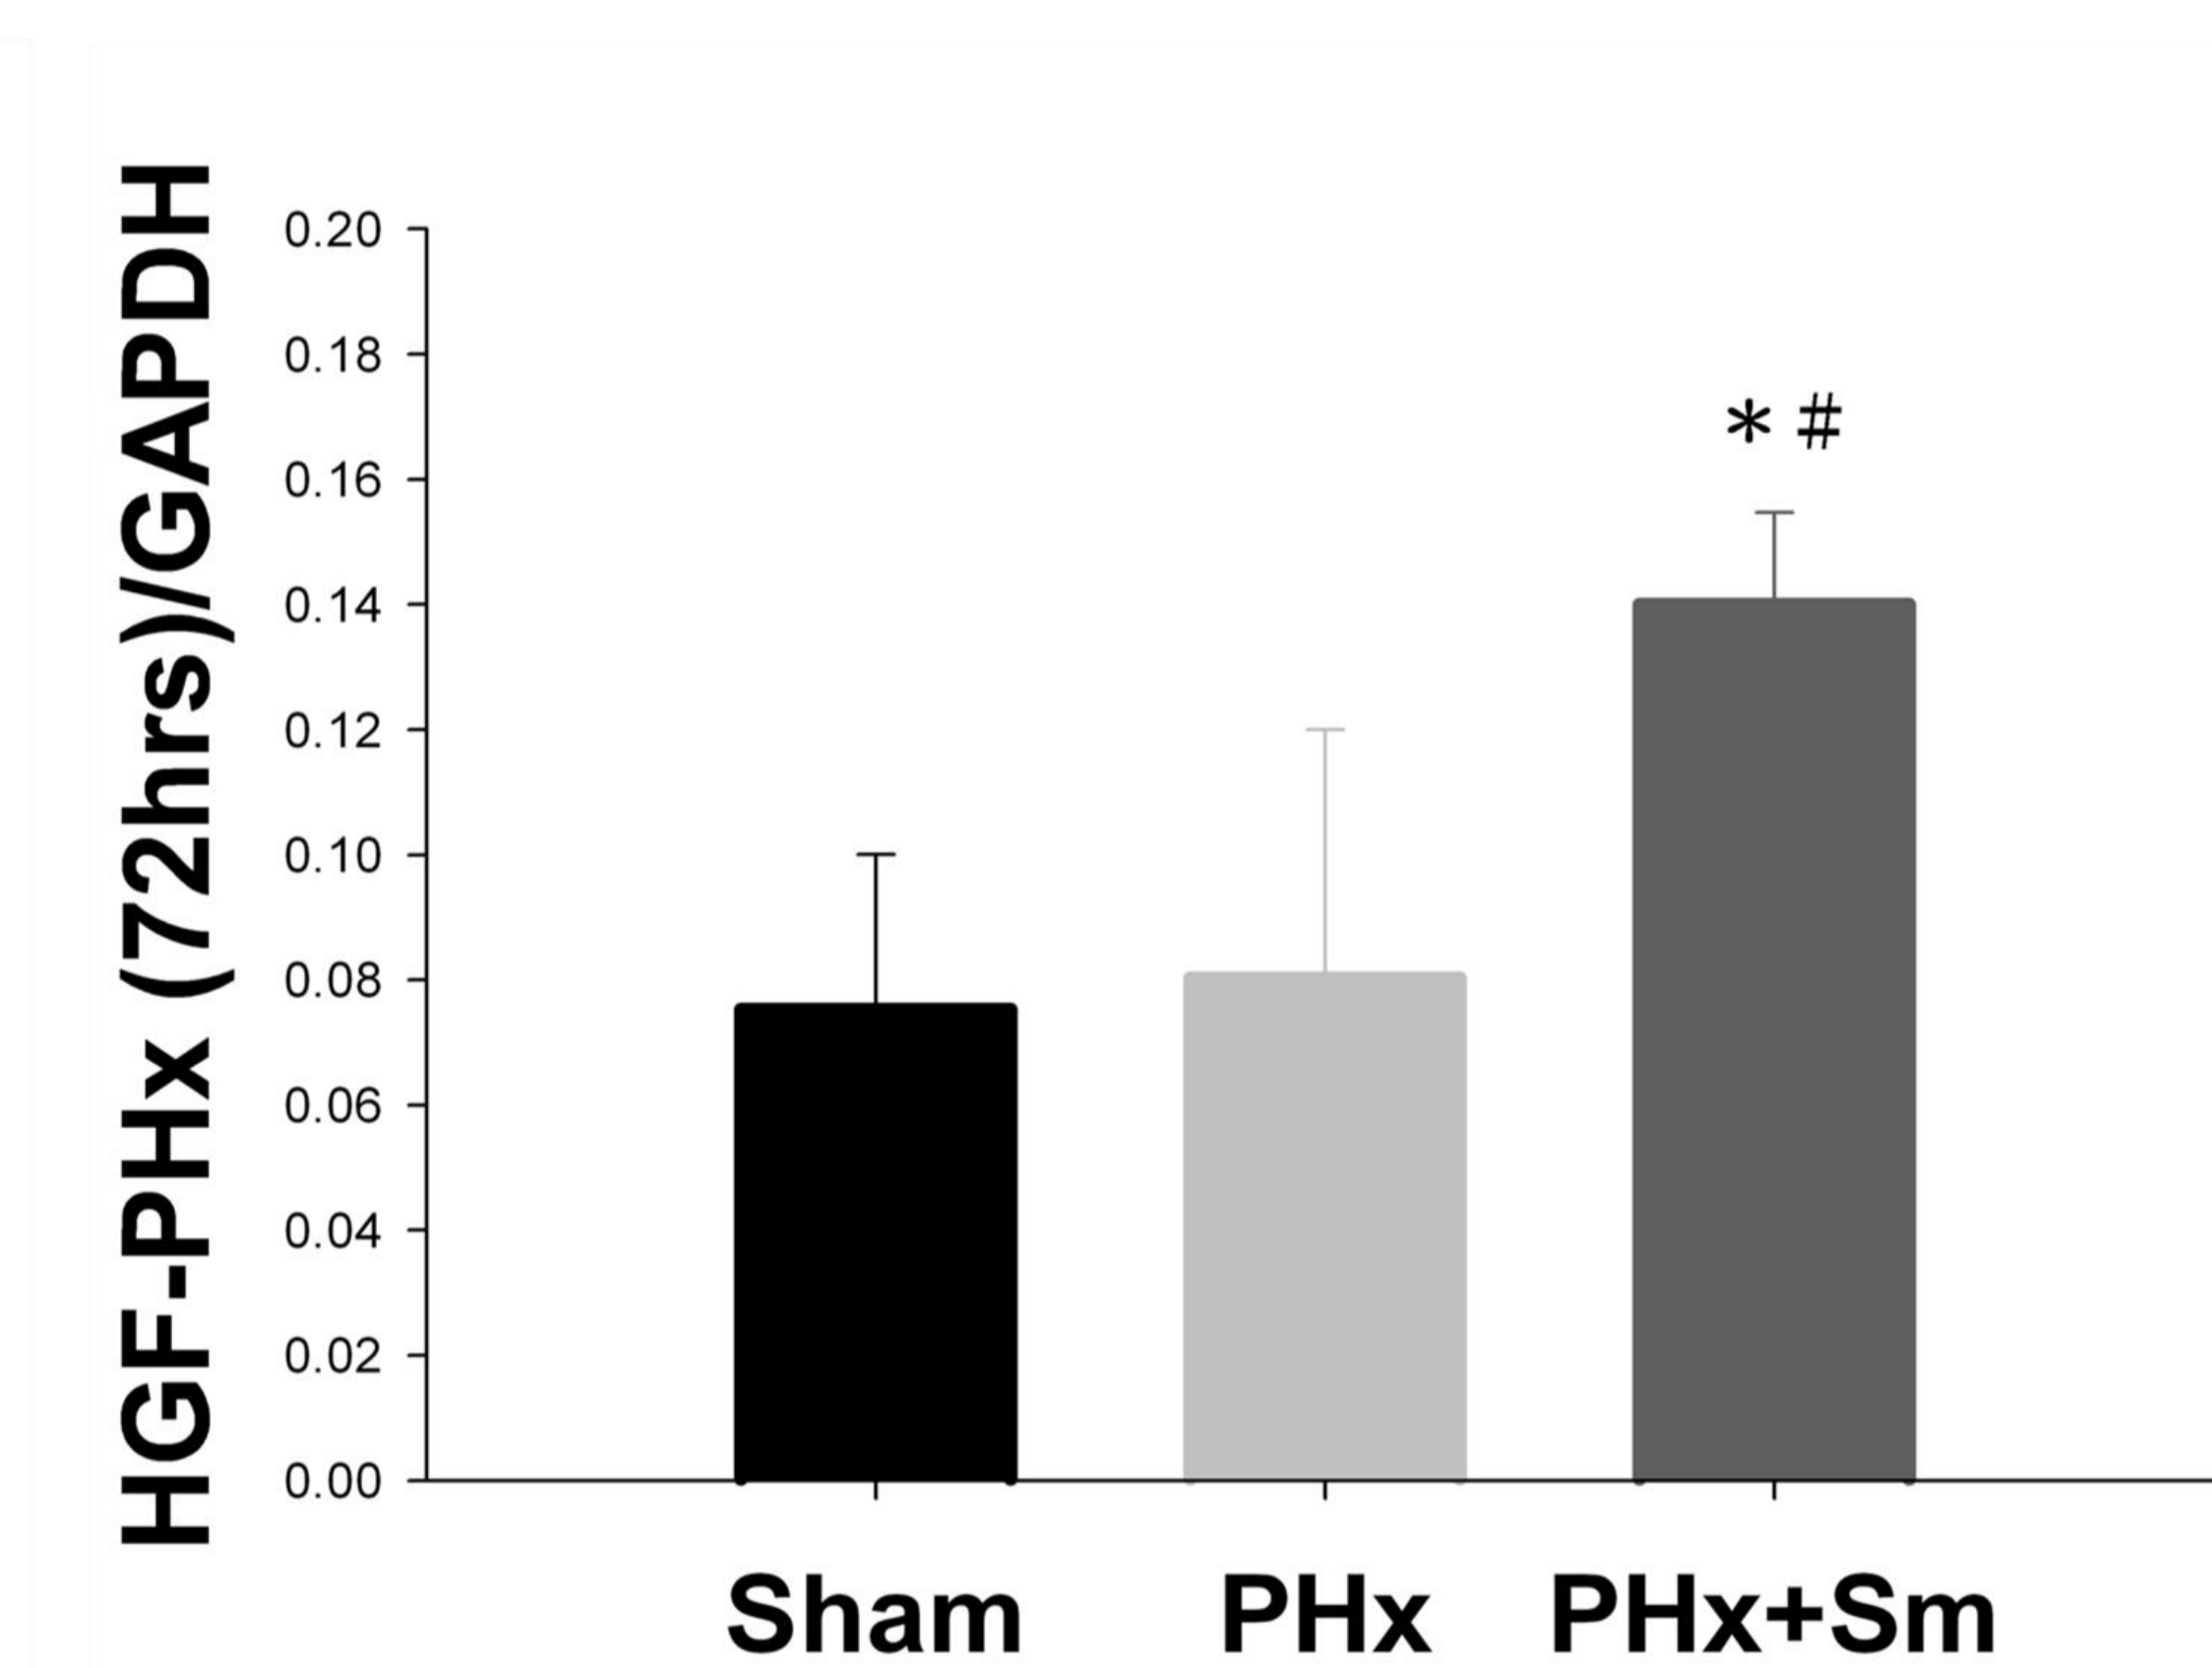**C**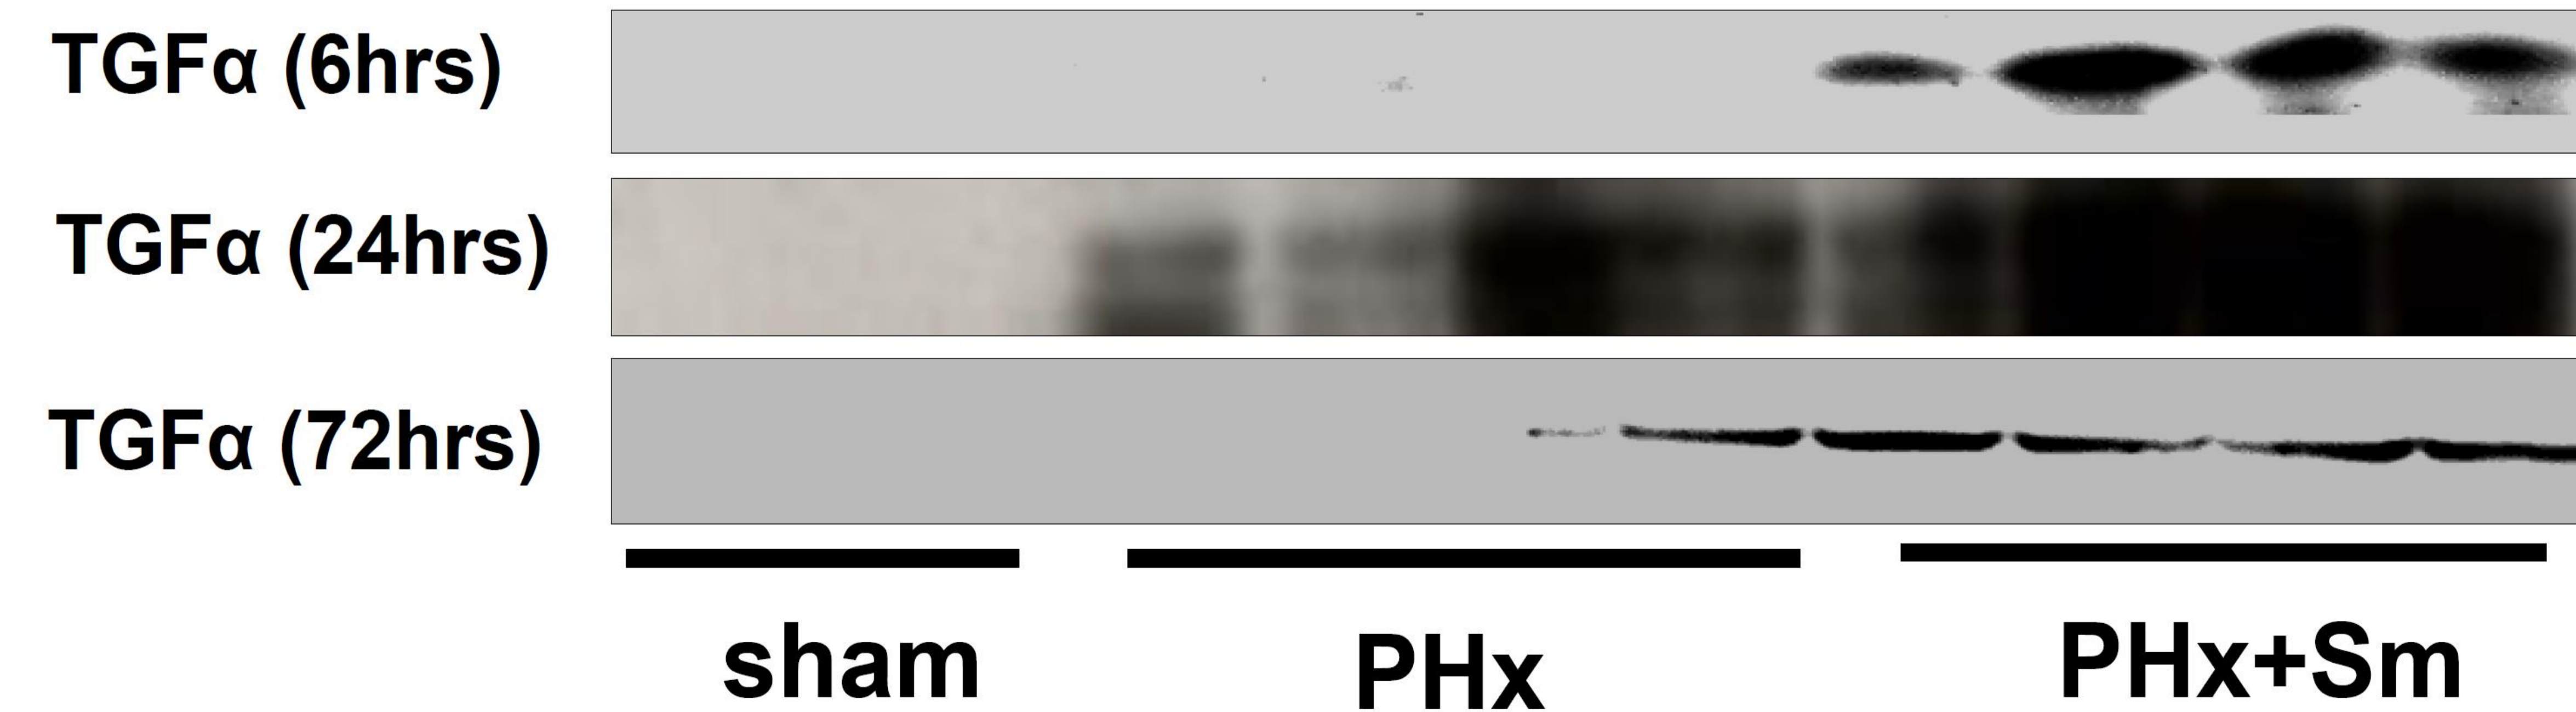

Supplement: f1 [file 2575273.f1.zip › Figure 5.pdf]
