# Supplementary material for: Retracted: Silymarin Accelerates Liver Regeneration after Partial Hepatectomy
Source: Hindawi journal article supplement (doi:10.1155/2017/2575273), 2017-01-01
Supplement: f1 [file 2575273.f1.zip]

Archive with 4 entries (4 files):
- Figure 1.pdf
- Figure 3.pdf
- Figure 5.pdf
- Figure 6.pdf
