# Supplementary material for: Retracted: Silymarin Accelerates Liver Regeneration after Partial Hepatectomy
Source: Hindawi journal article supplement (doi:10.1155/2017/2575273), 2017-01-01
Supplement: f1 [file 2575273.f1.zip › Figure 1.pdf]

**Cyclin D1 (6hrs)**

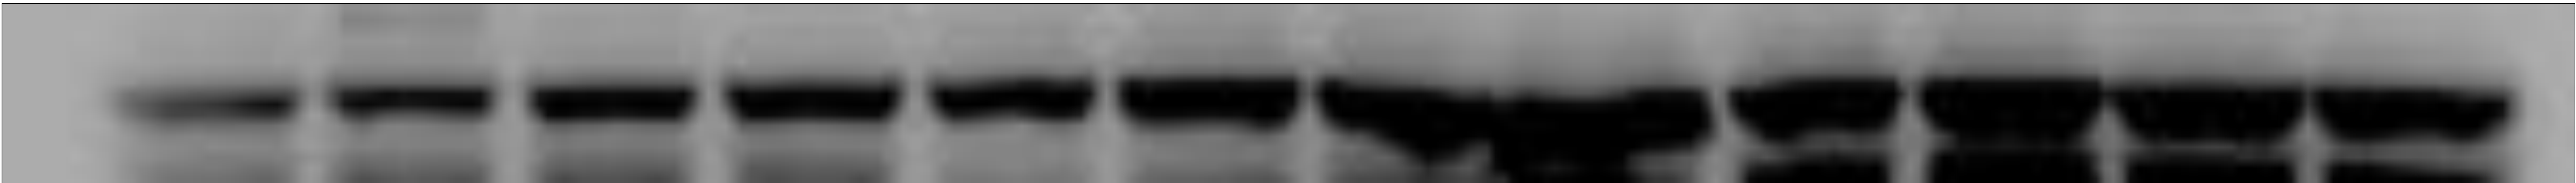

**pRb (6hrs)**

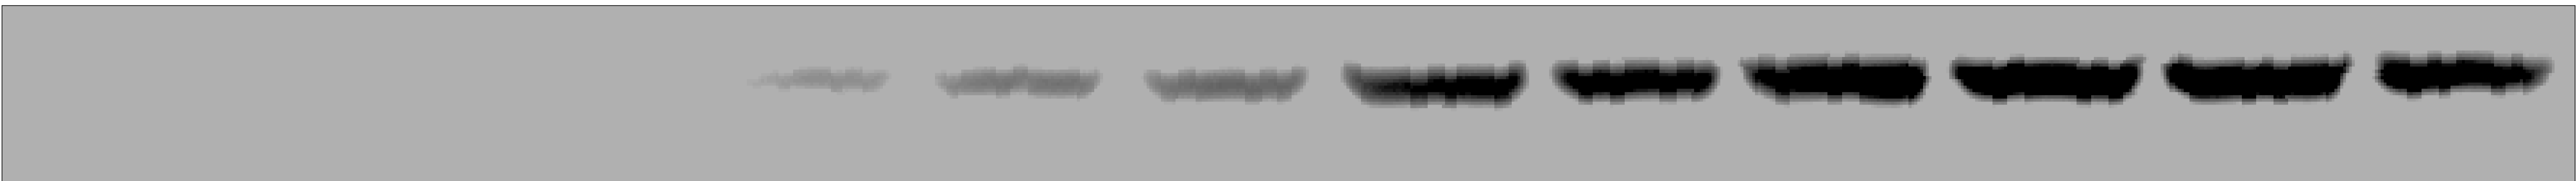

**Cyclin E (6hrs)**

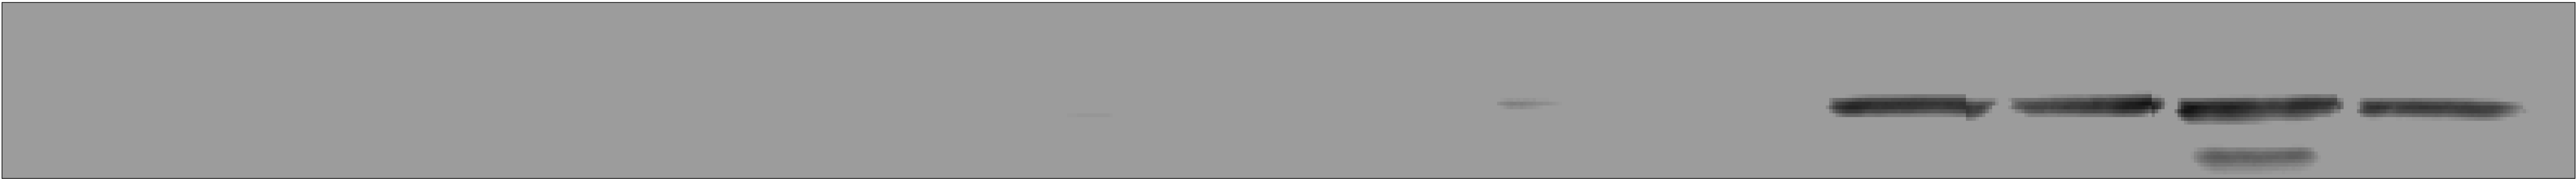

**E2F (6hrs)**

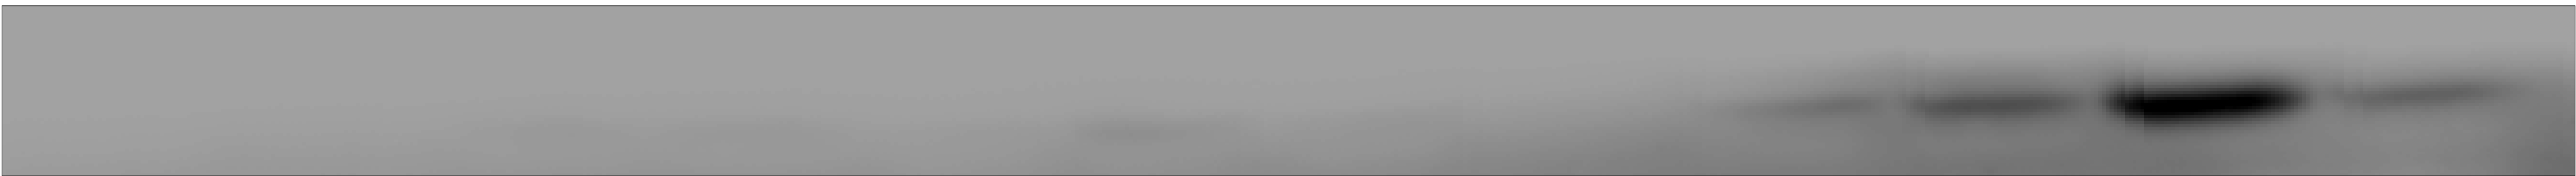

**$\alpha$ -Tubulin**

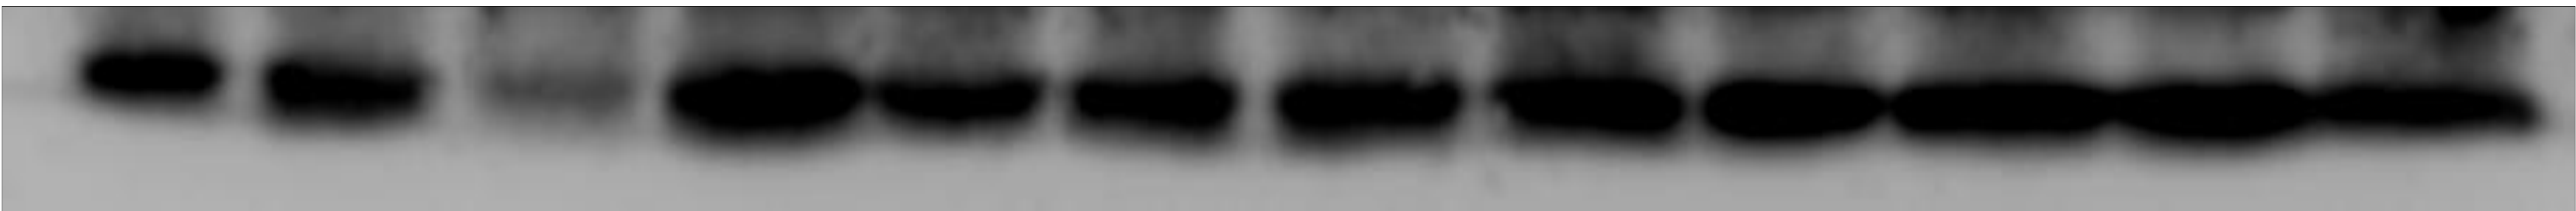

**Sham**

**PHx**

**PHx+Sm**

# protein expression relative density

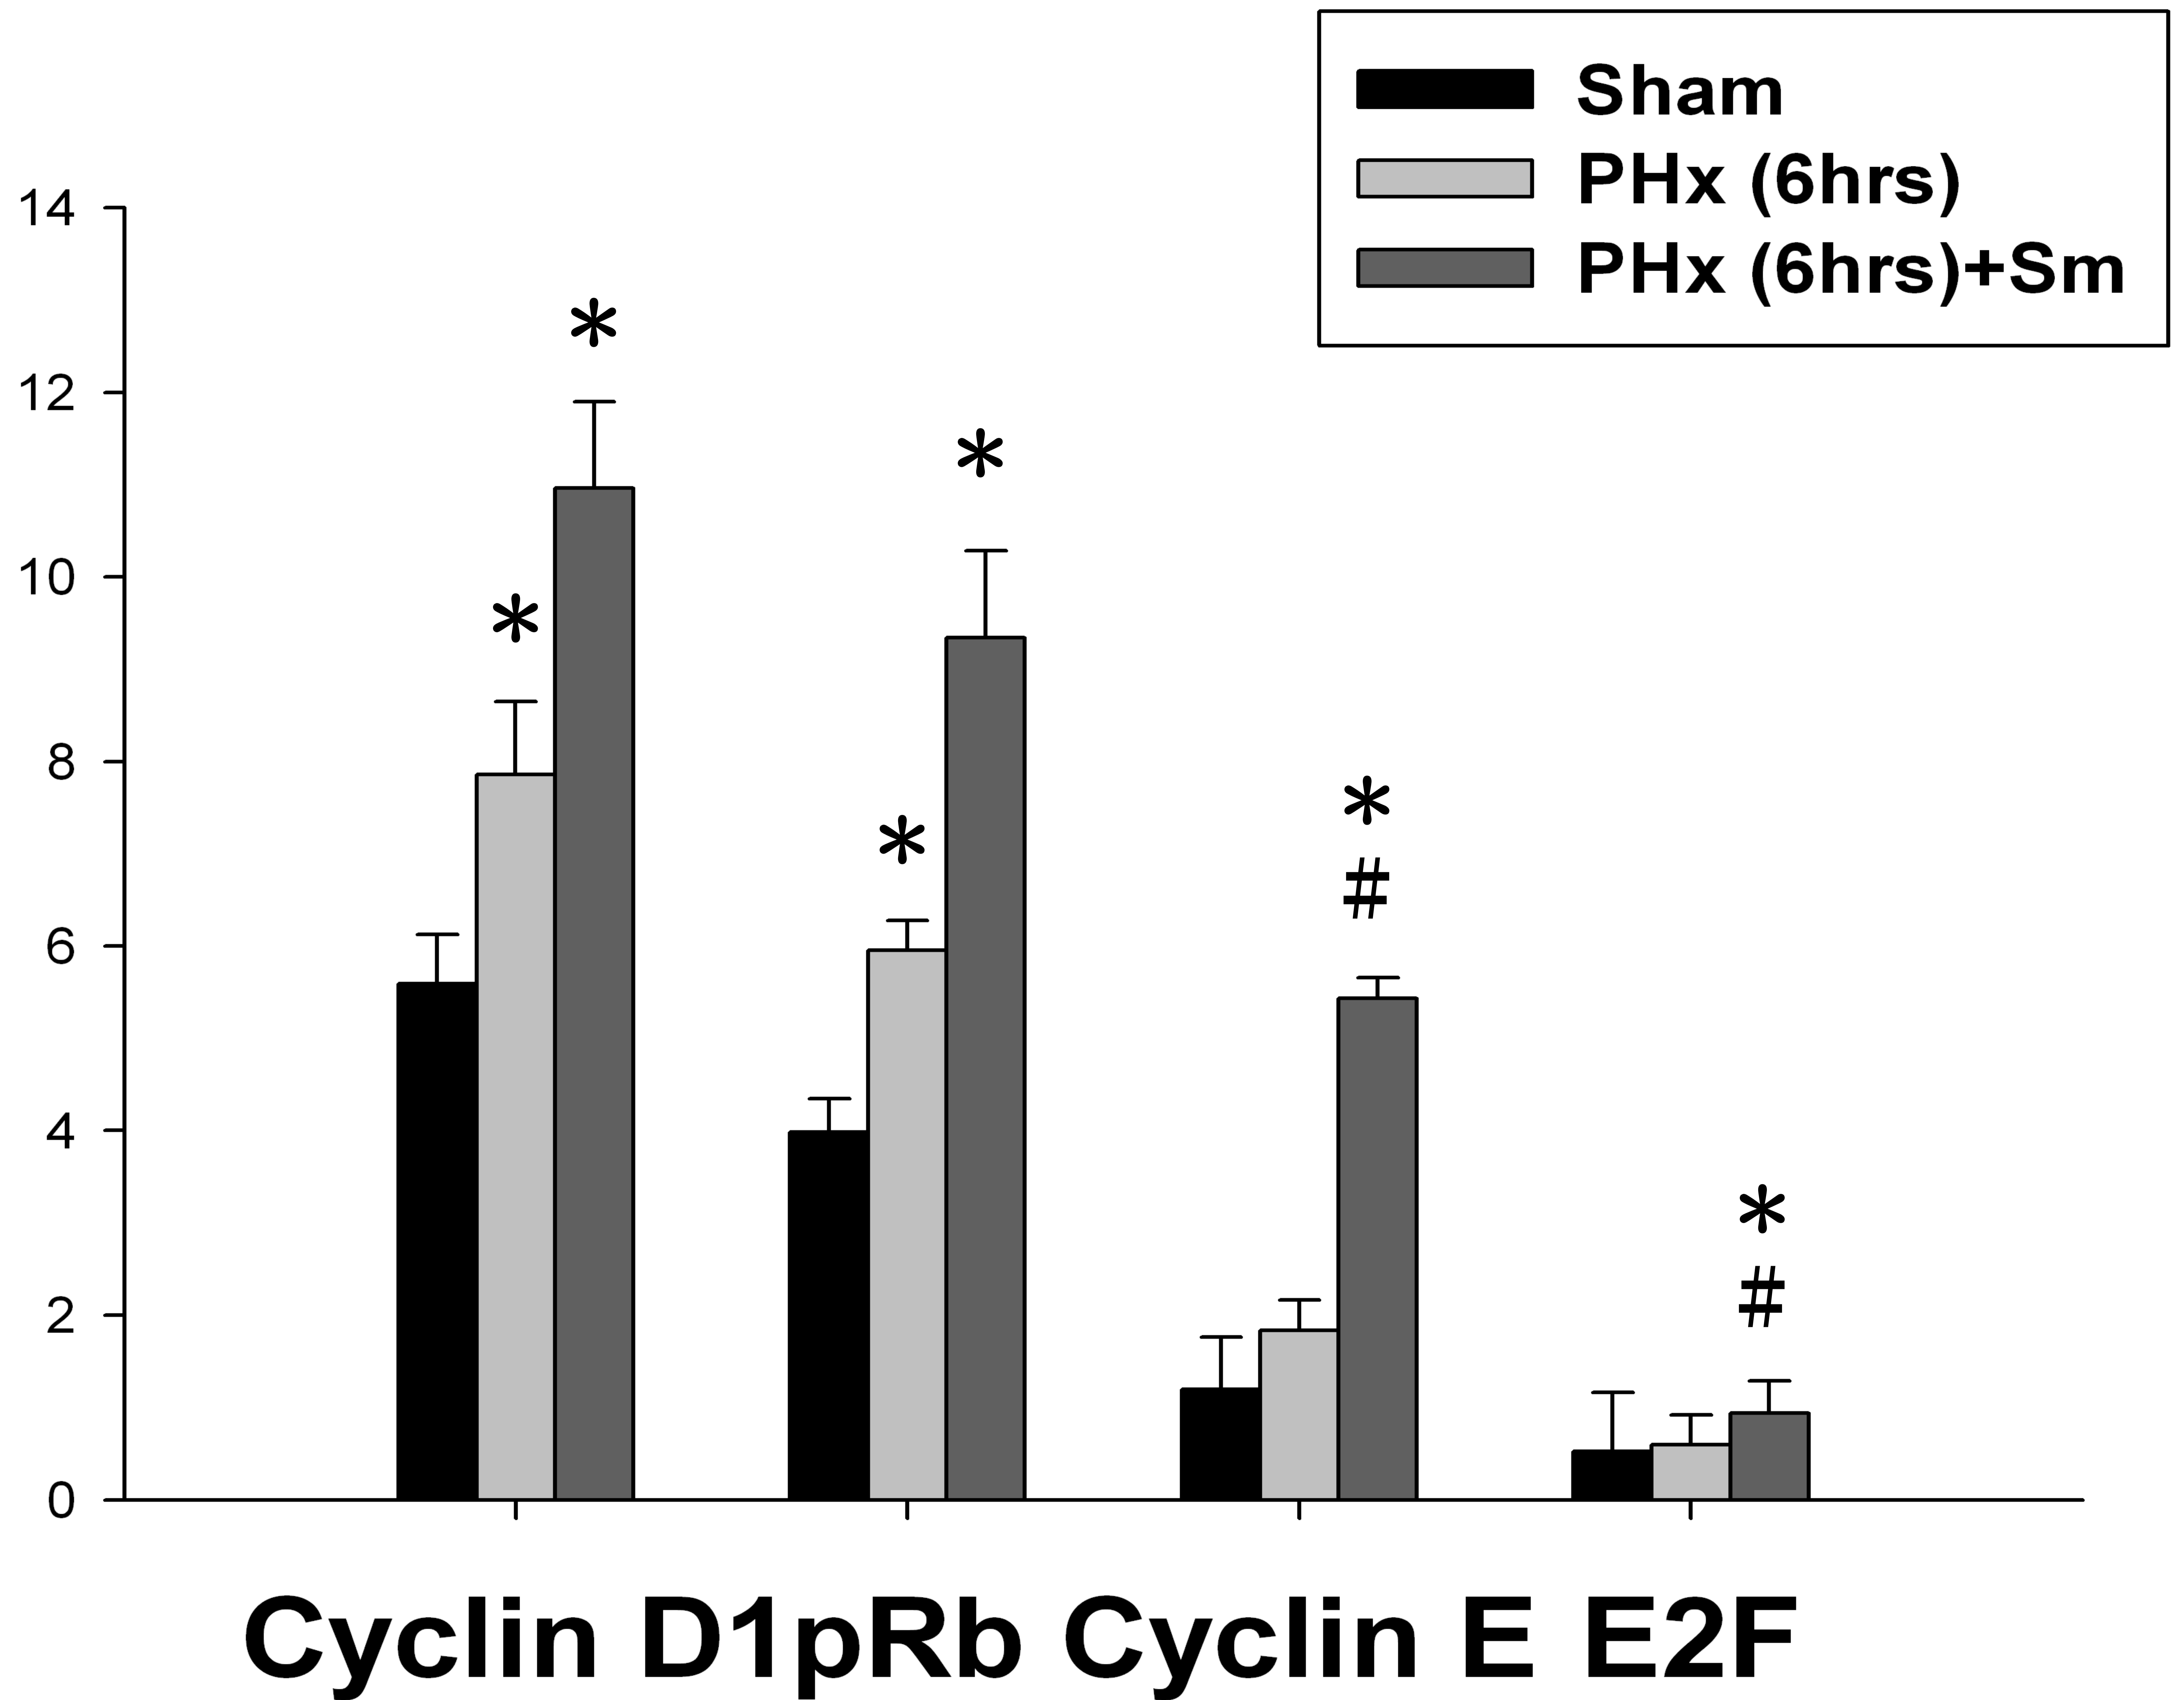

**Cyclin D1 (24hrs)**

**pRb (24hrs)**

**Cyclin E (24hrs)**

**E2F (24hrs)**

**$\alpha$ -Tubulin**

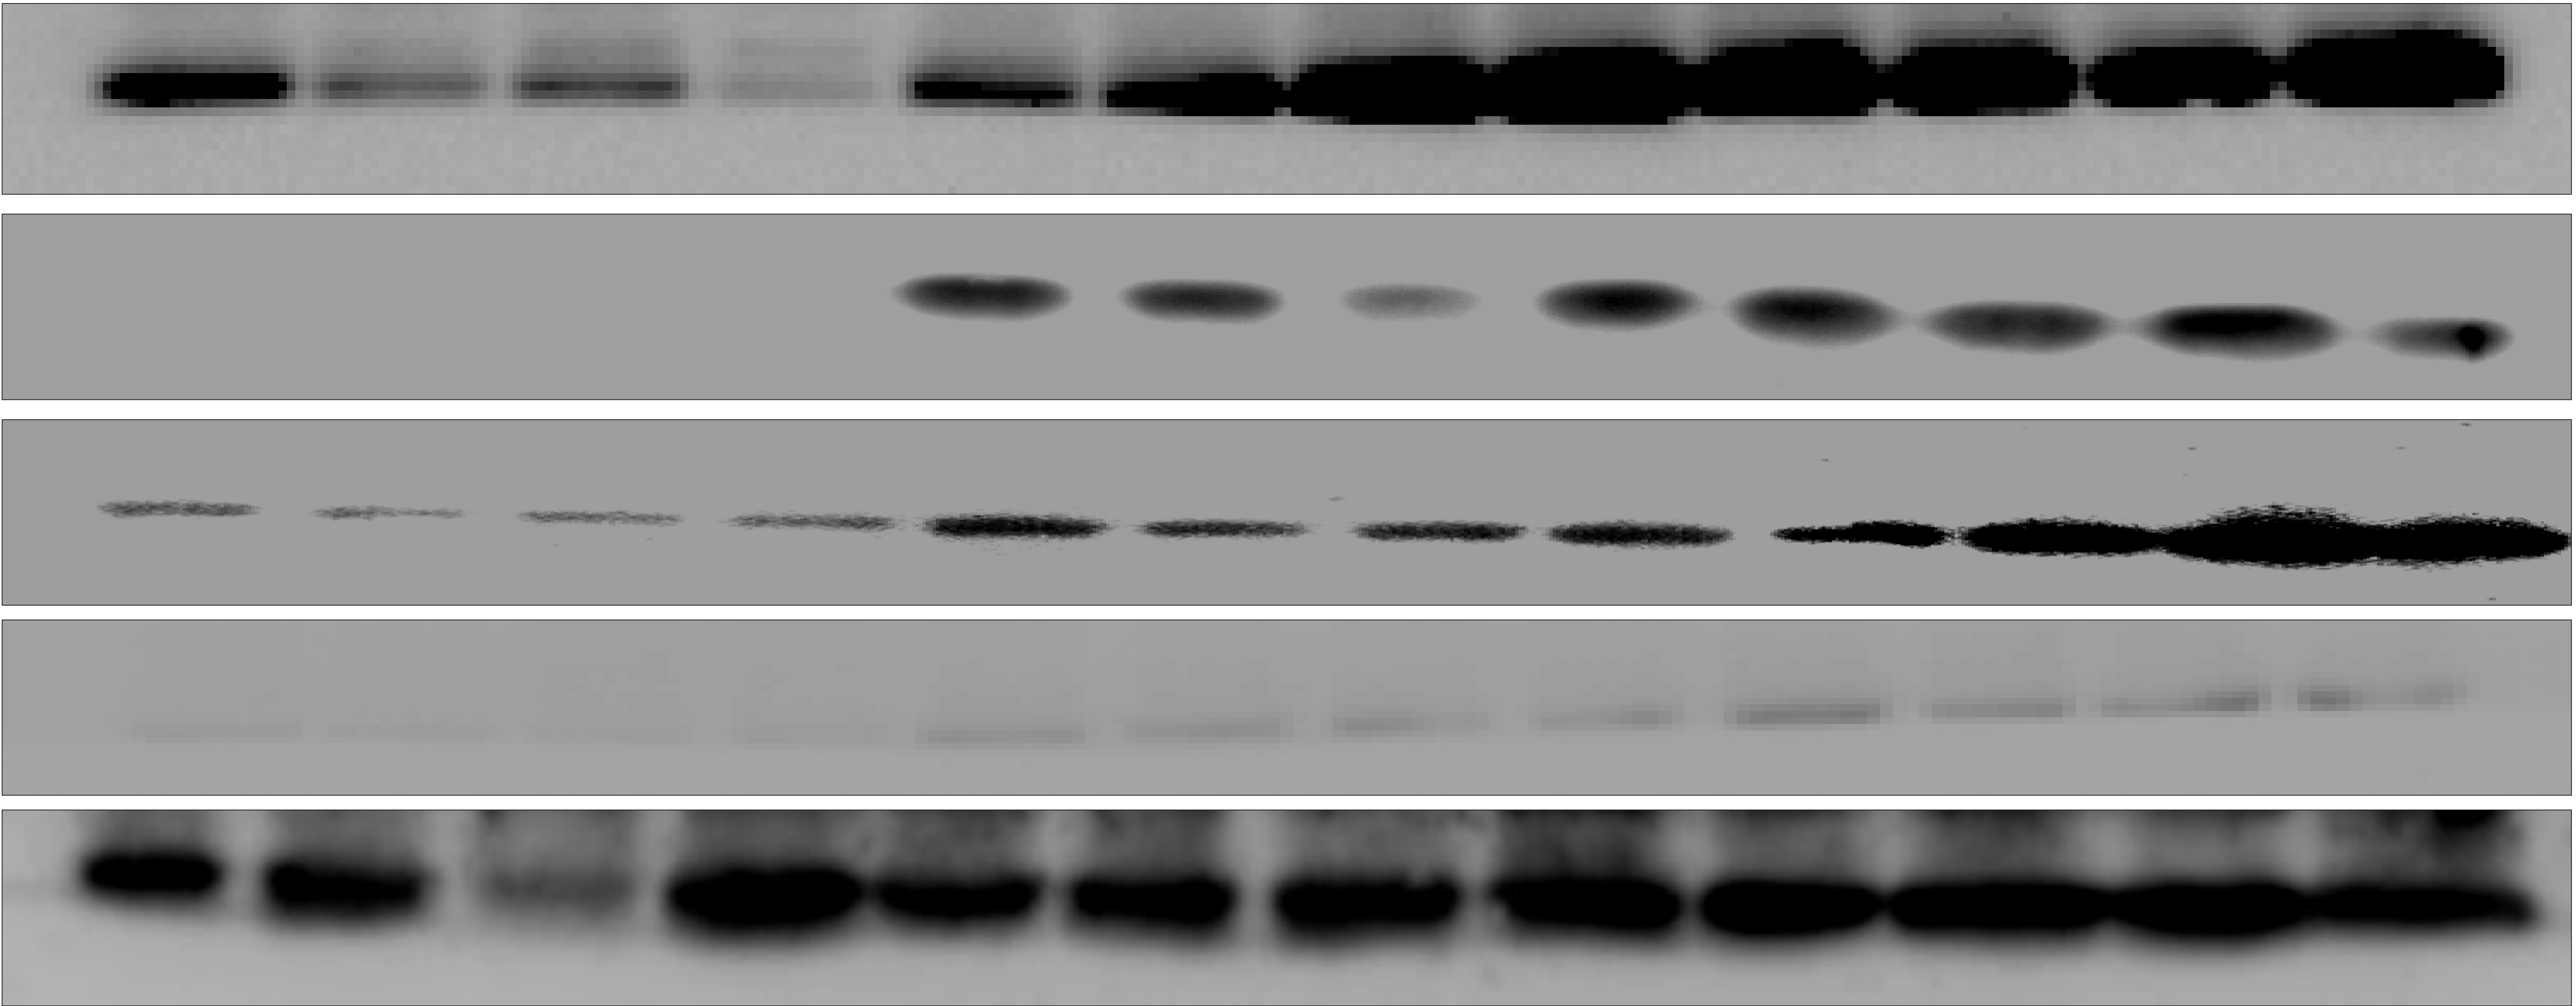

**Sham**

**PHx**

**PHx+Sm**

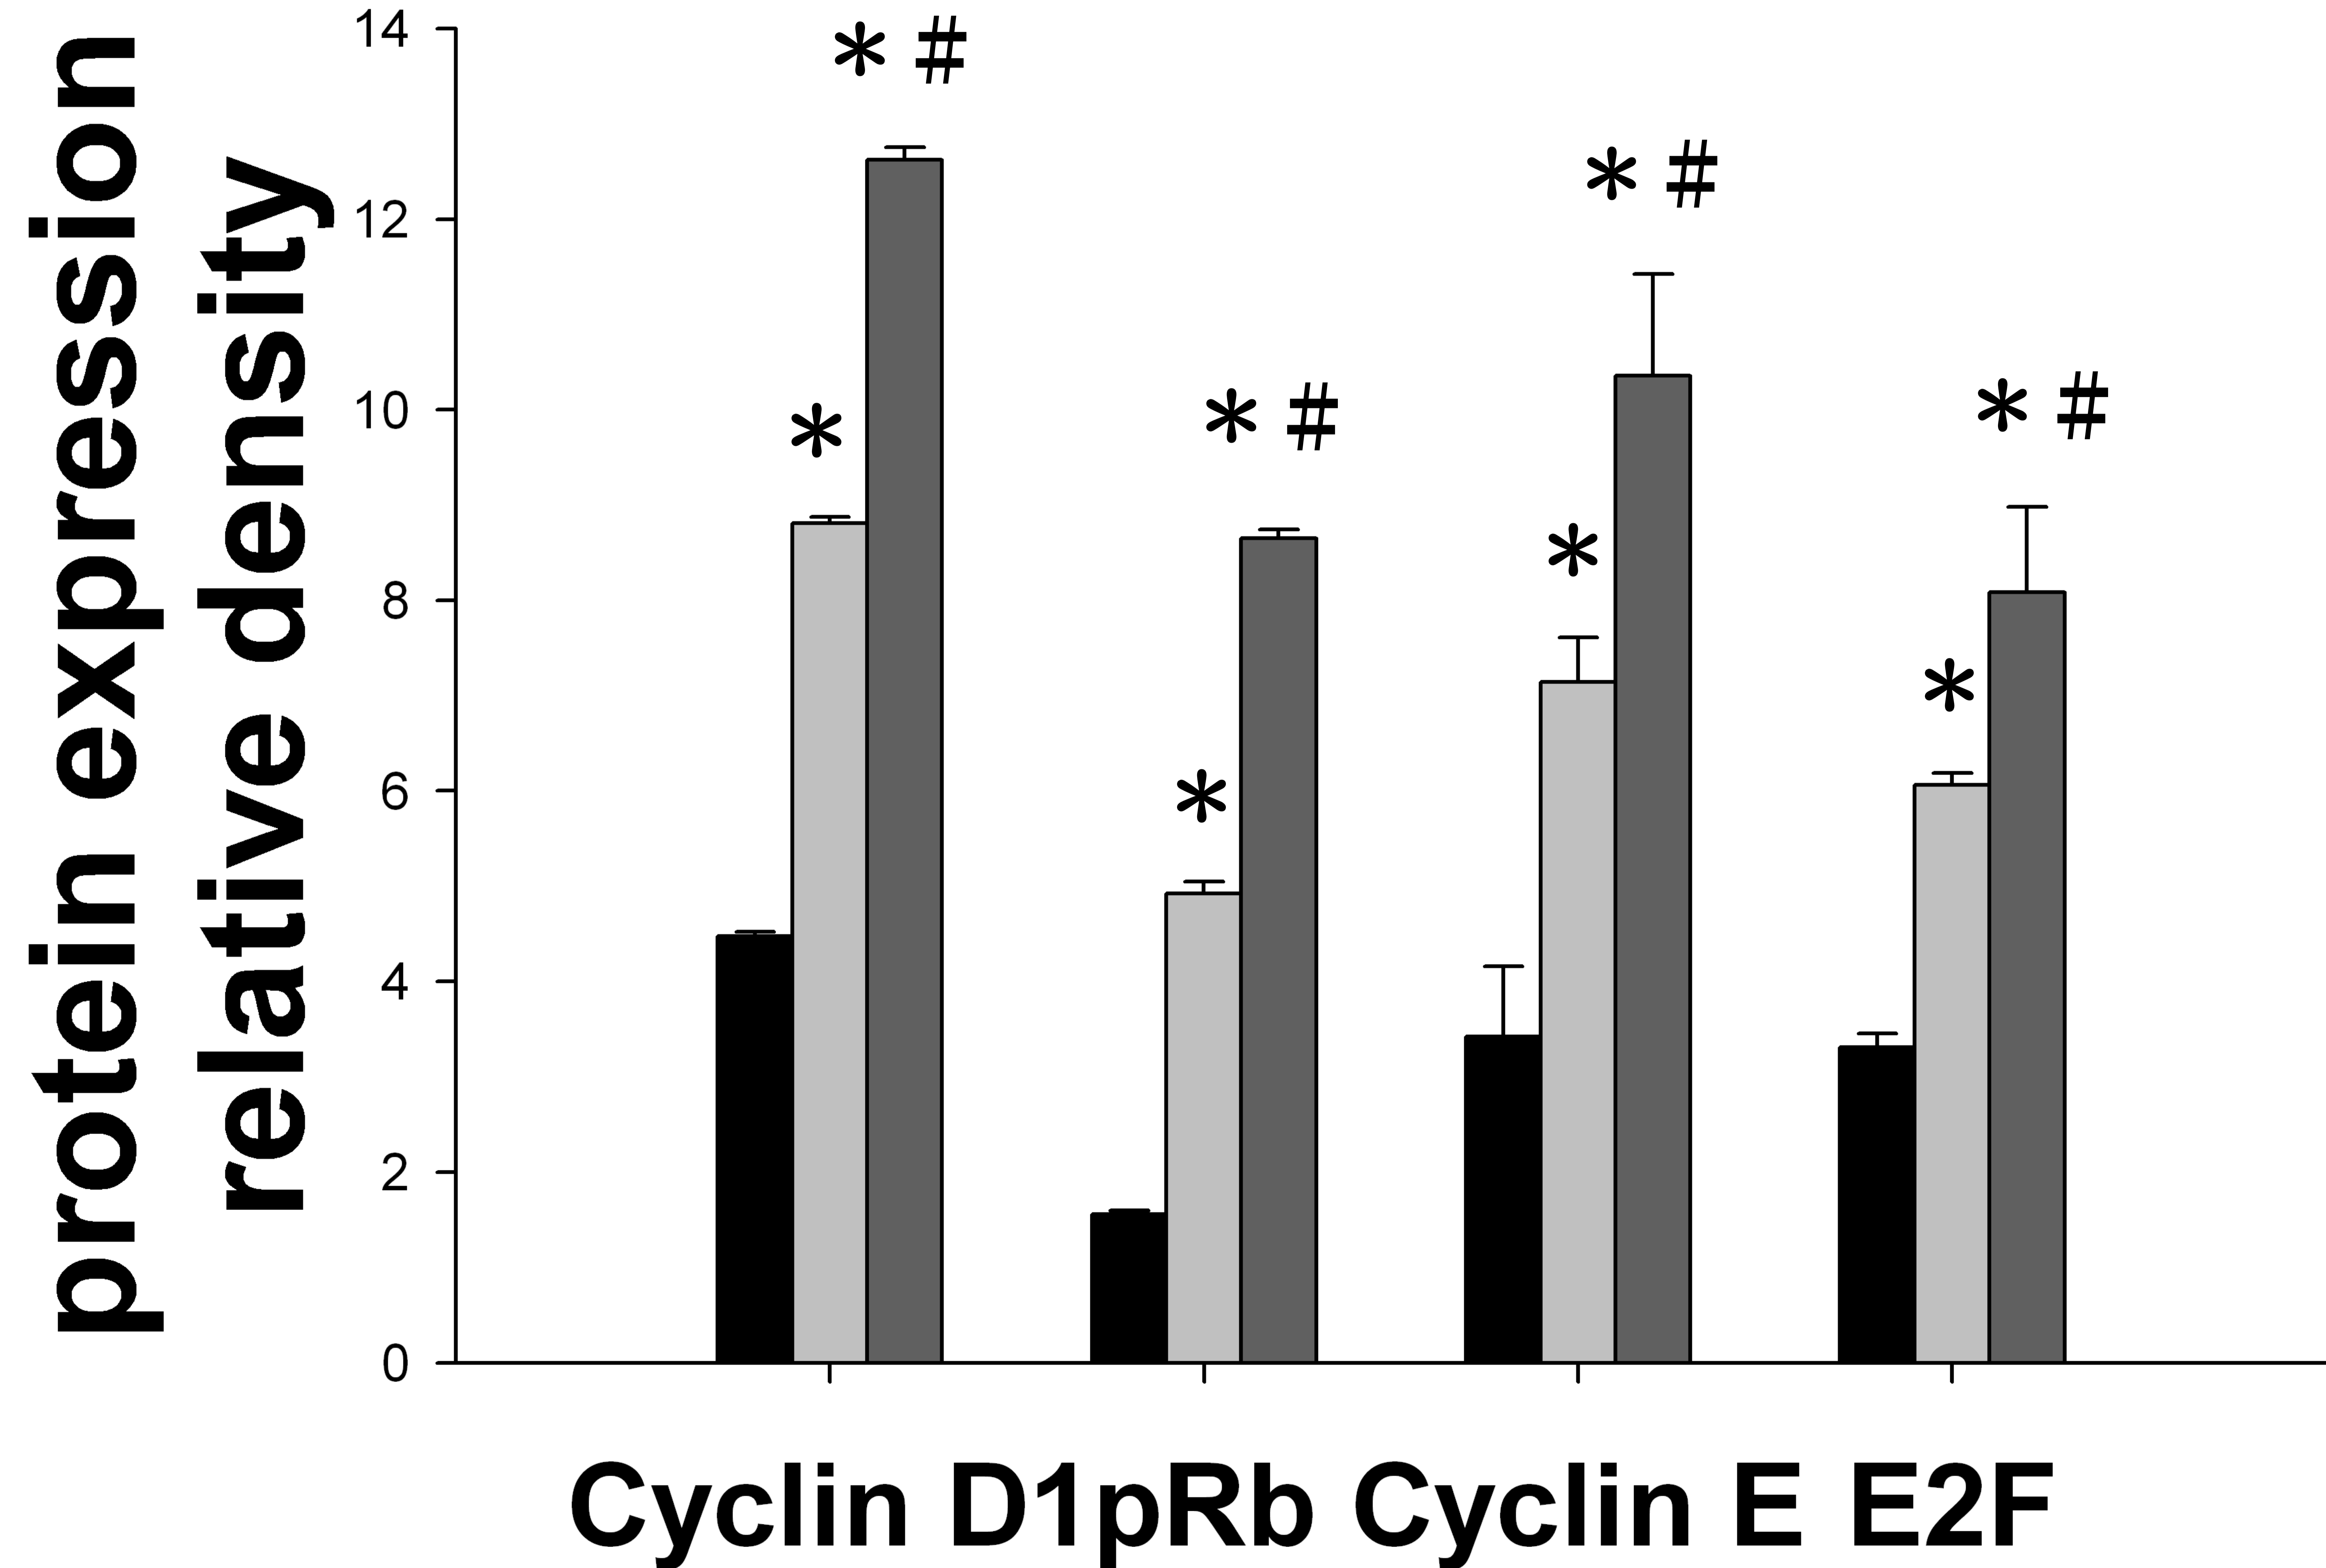

**Cyclin D1 (72hrs)**

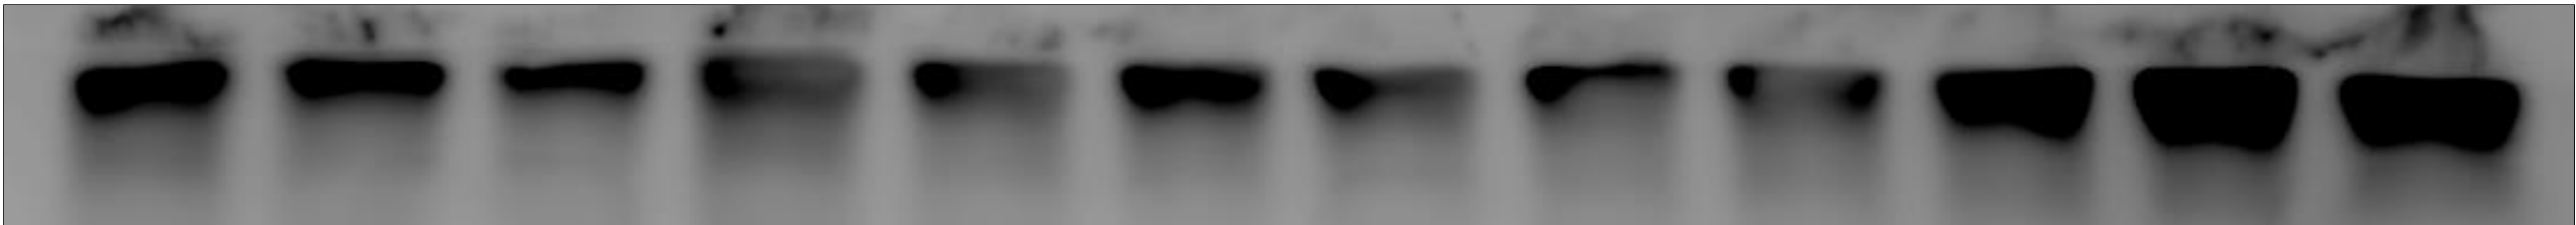

**pRb (72hrs)**

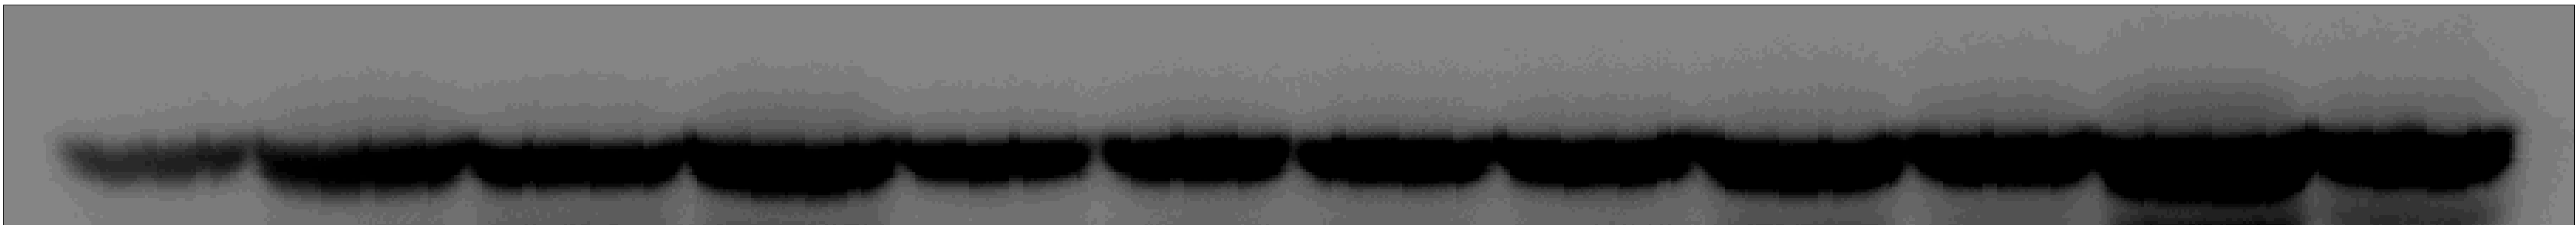

**Cyclin E (72hrs)**

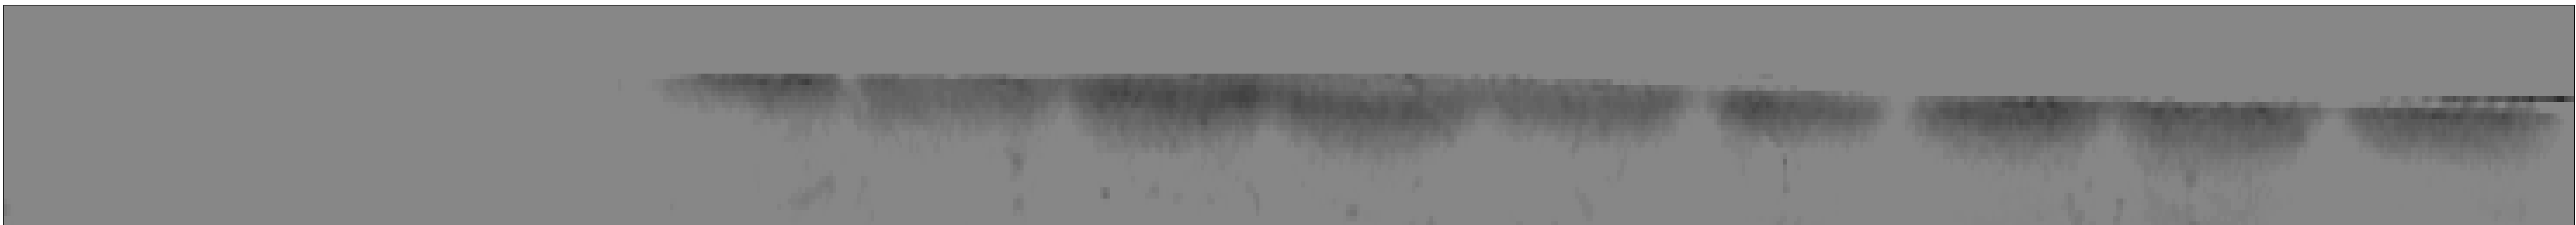

**E2F (72hrs)**

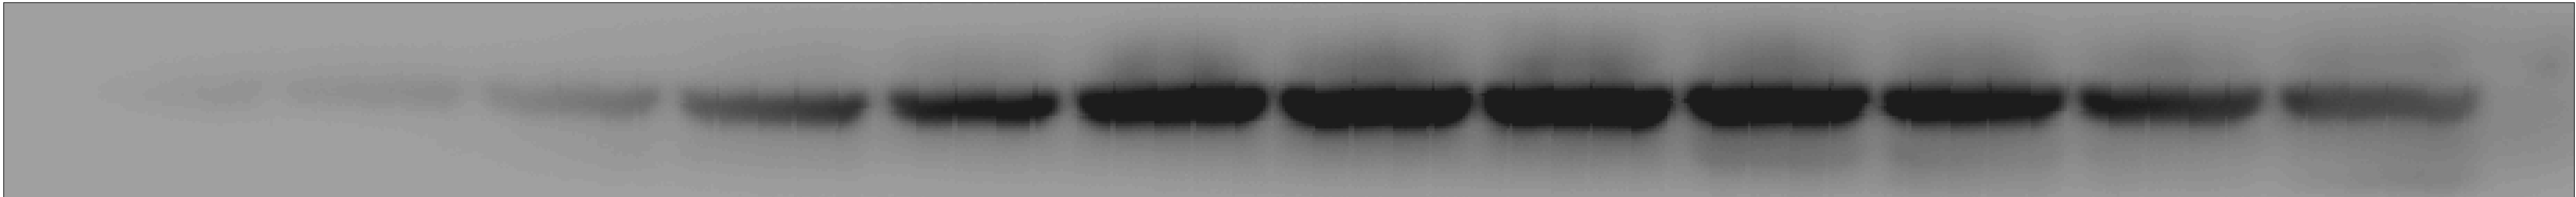

**$\alpha$ -Tubulin**

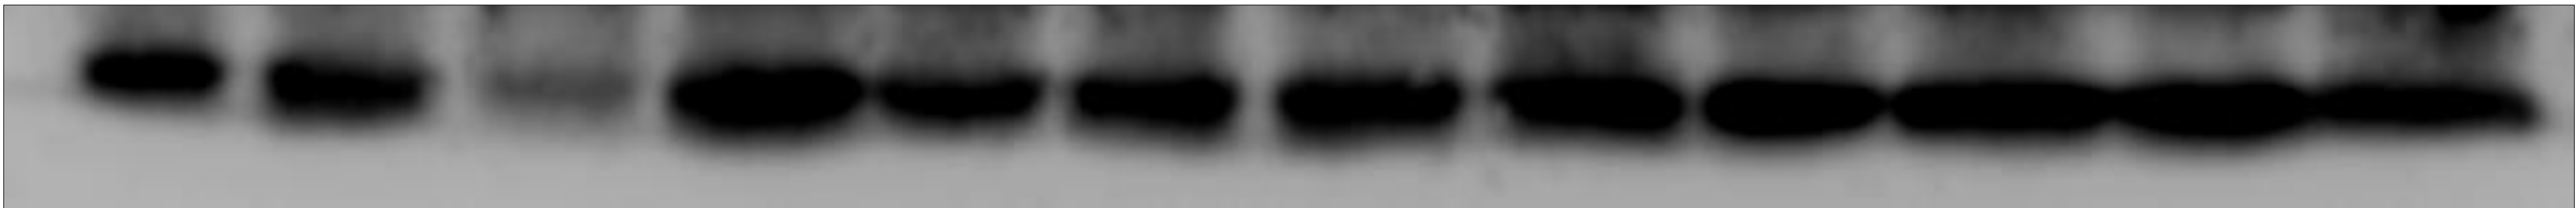

**Sham**

**PHx**

**PHx+Sm**

**protein expression  
relative density**

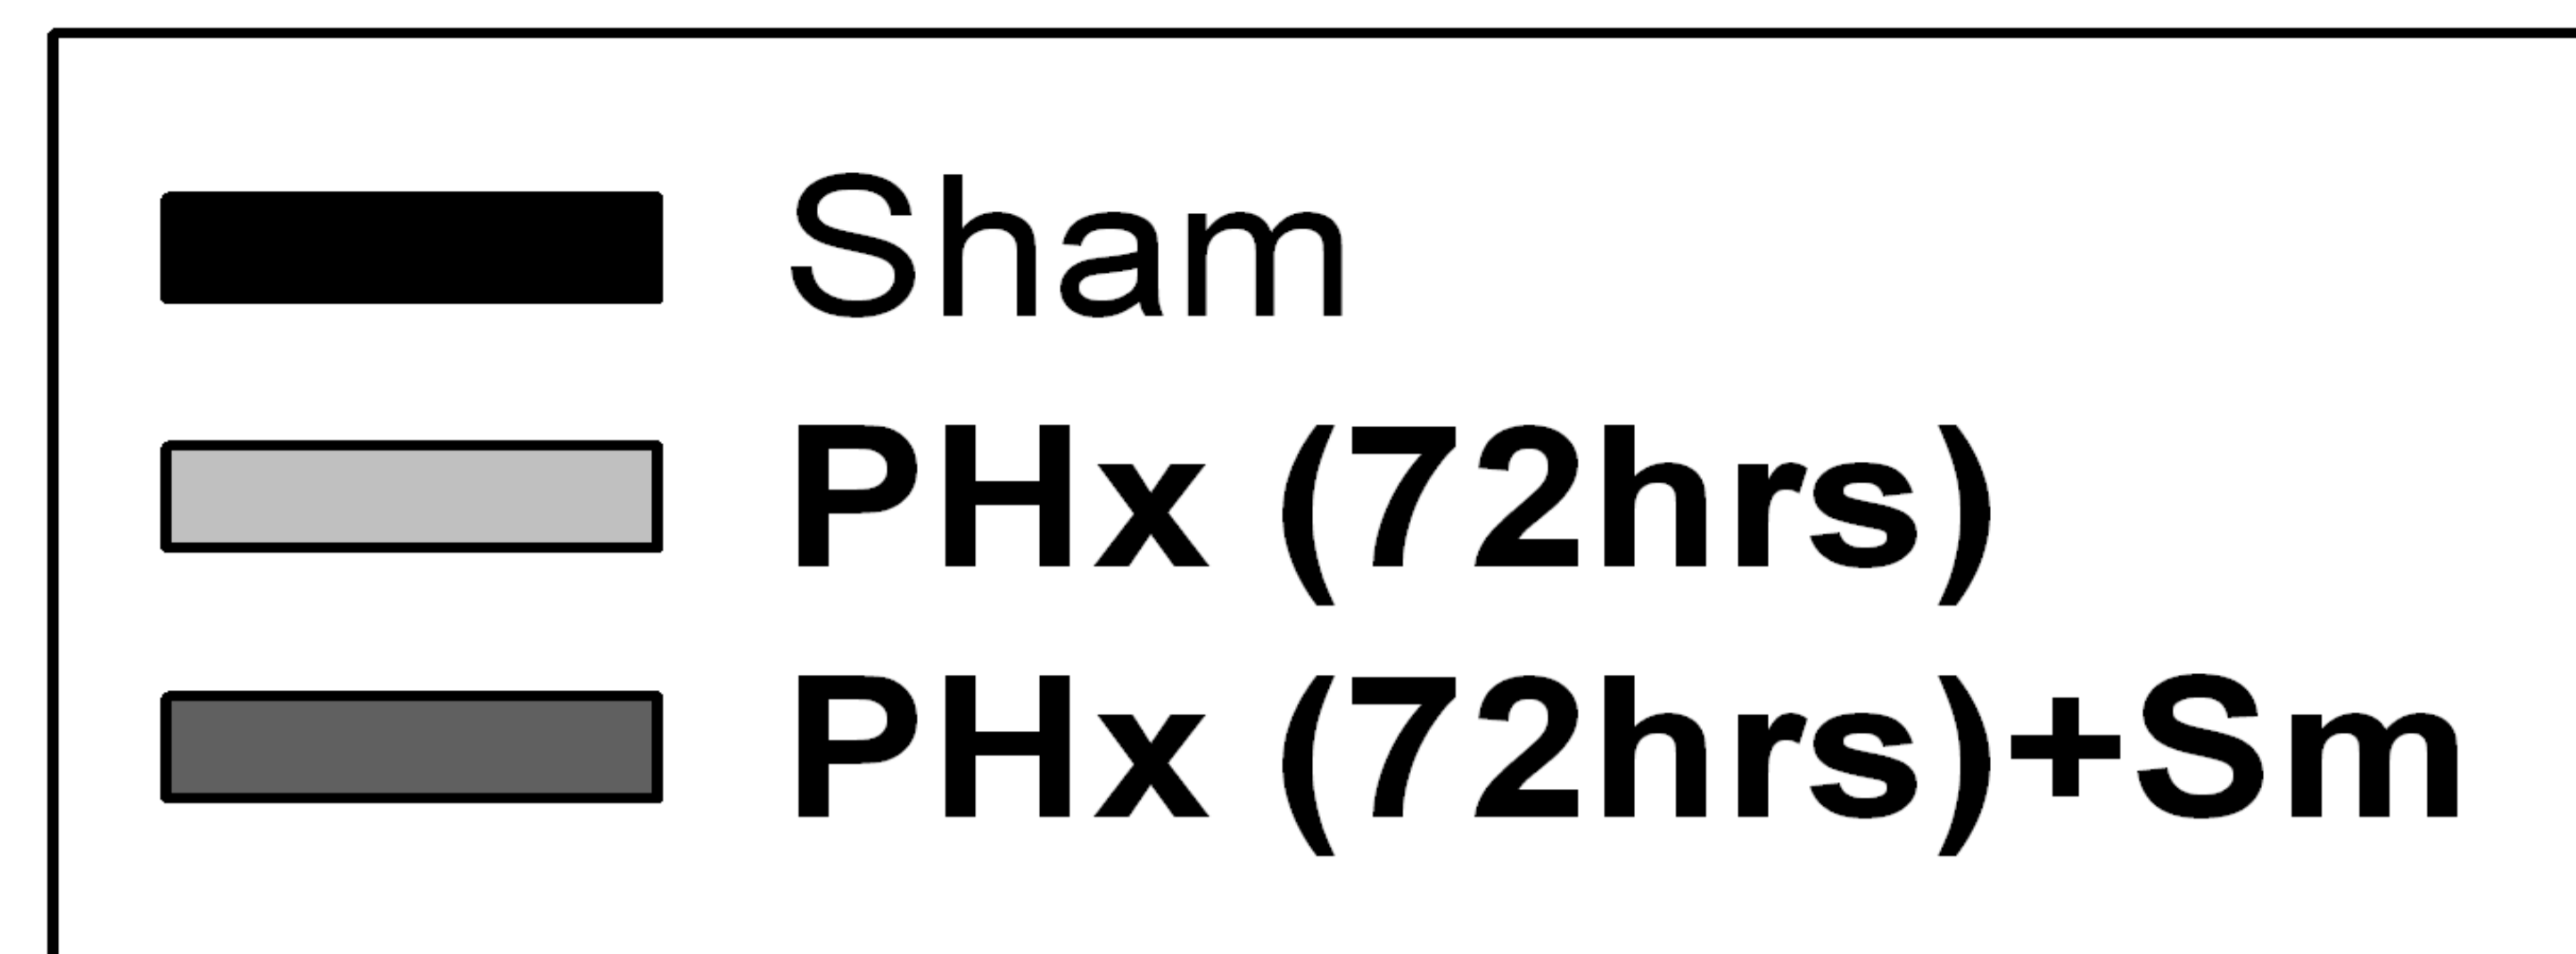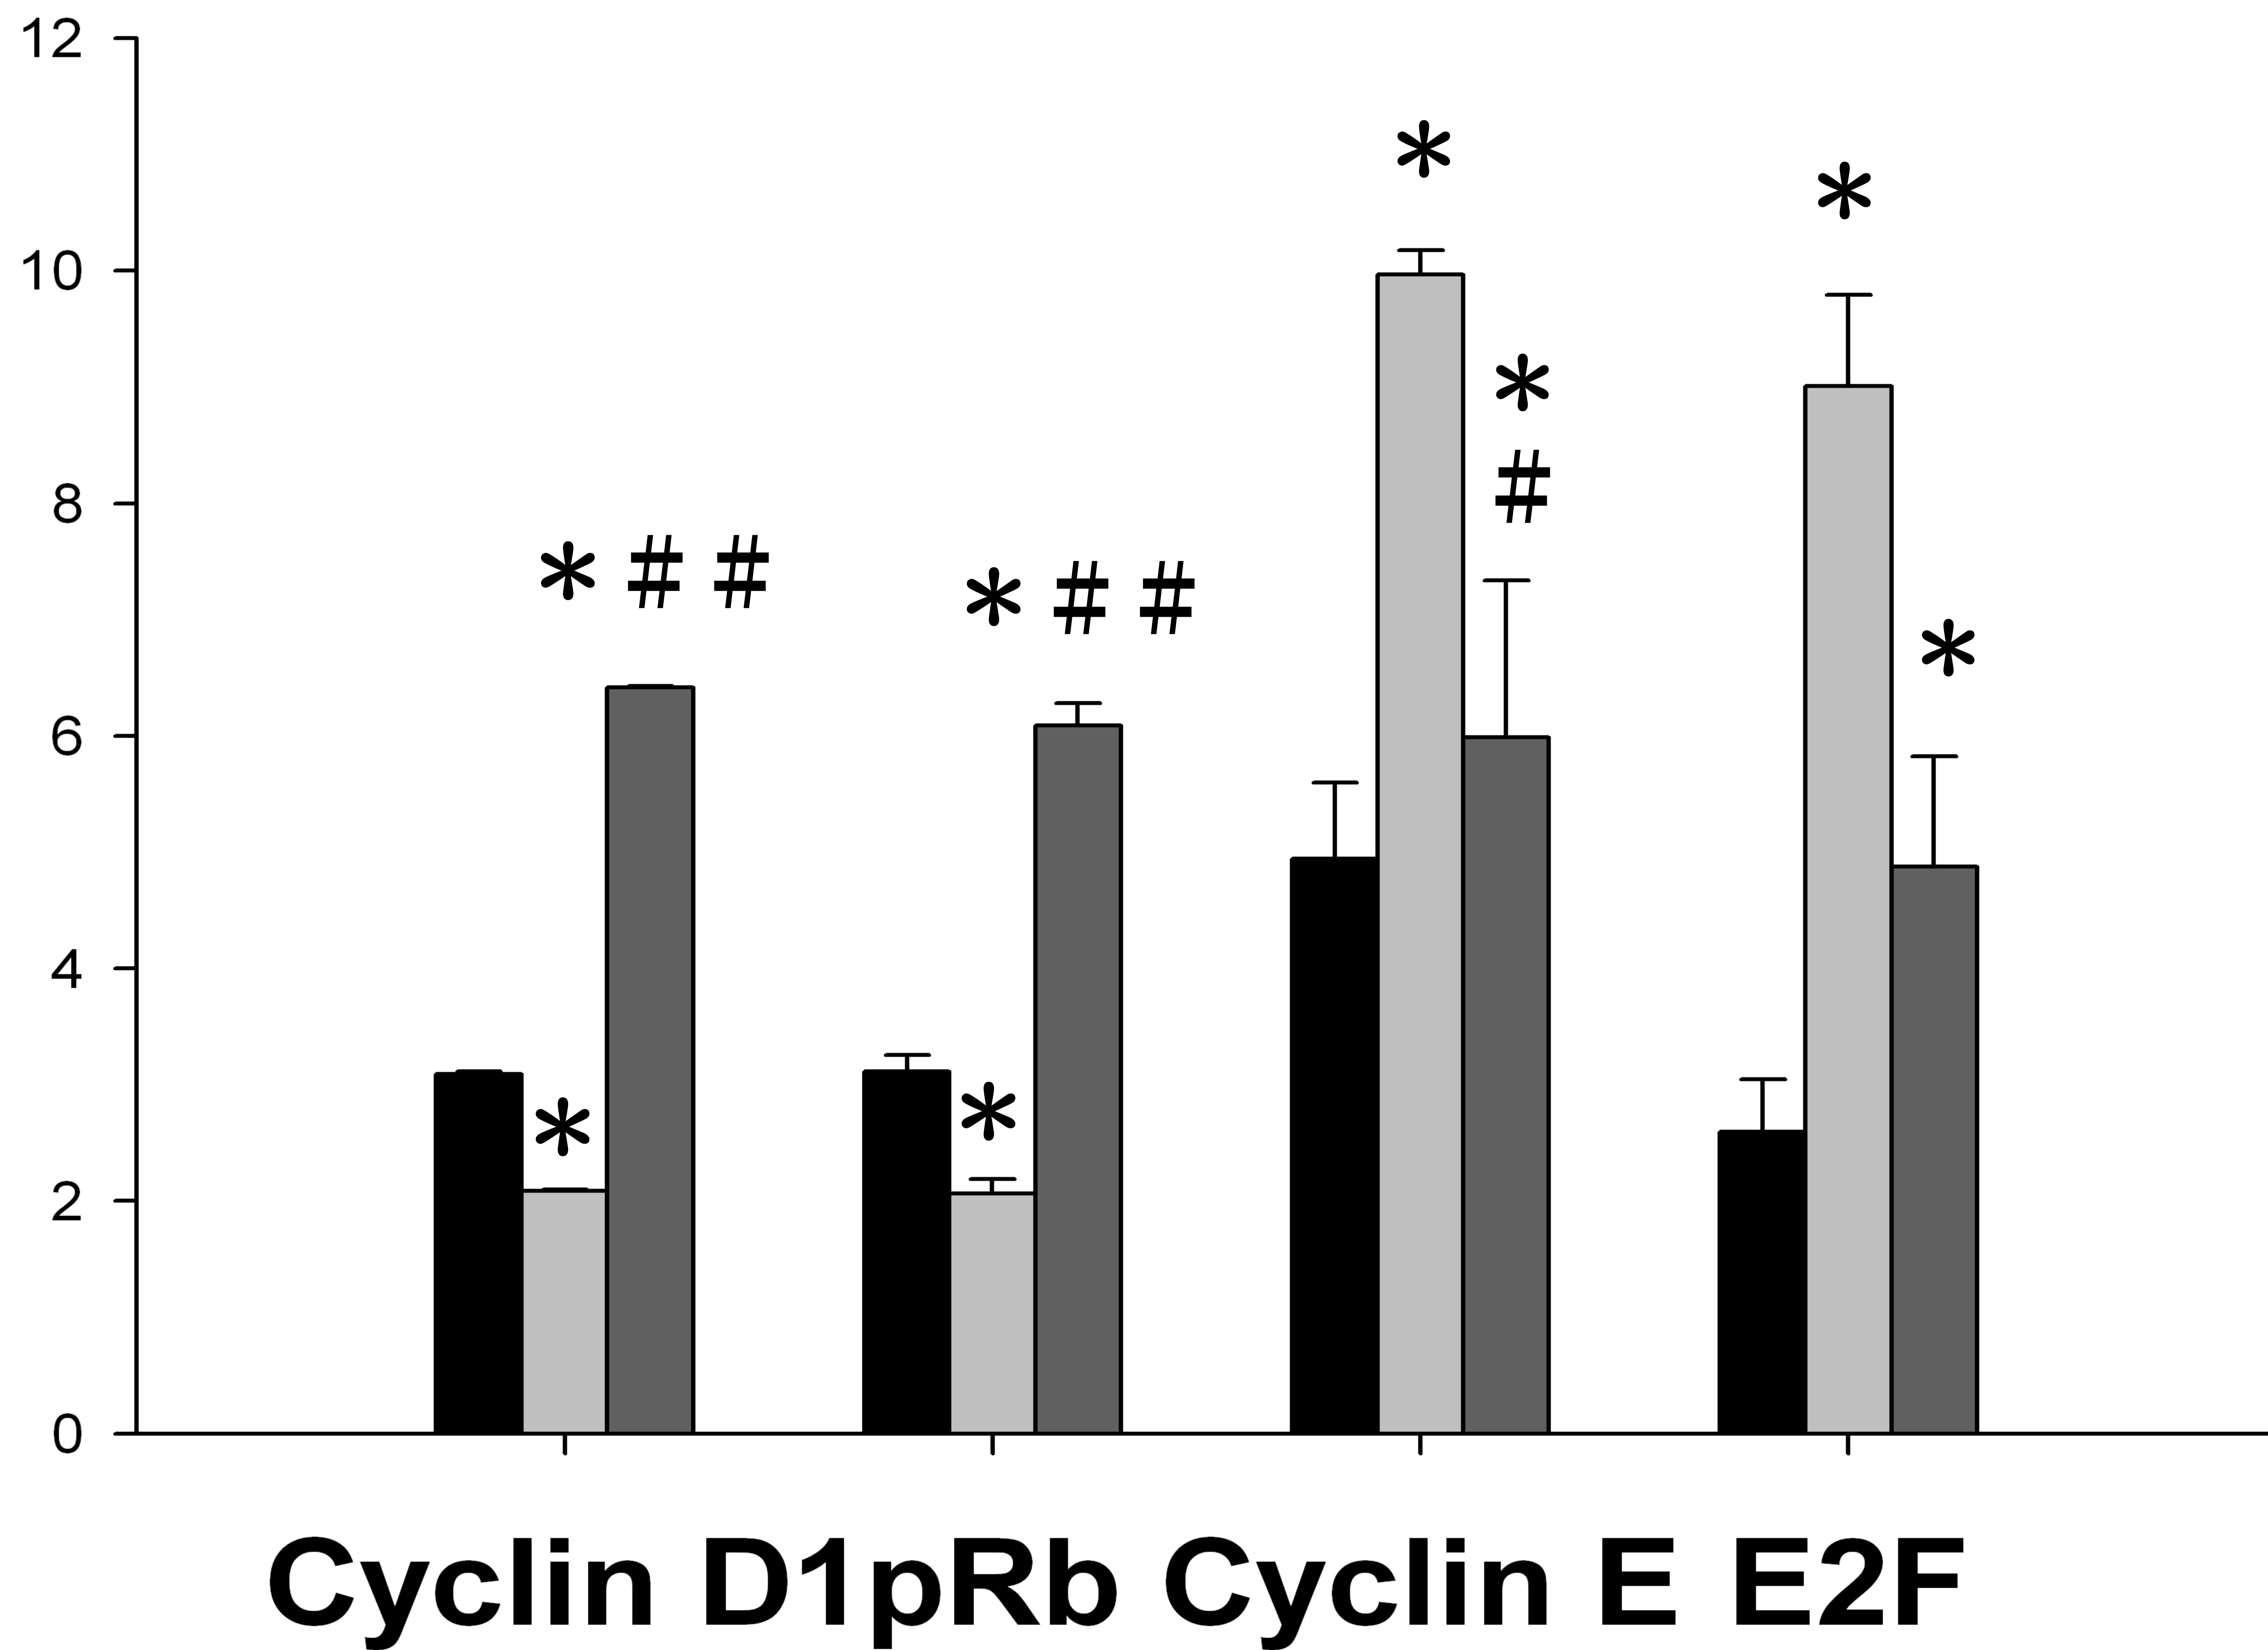

**A**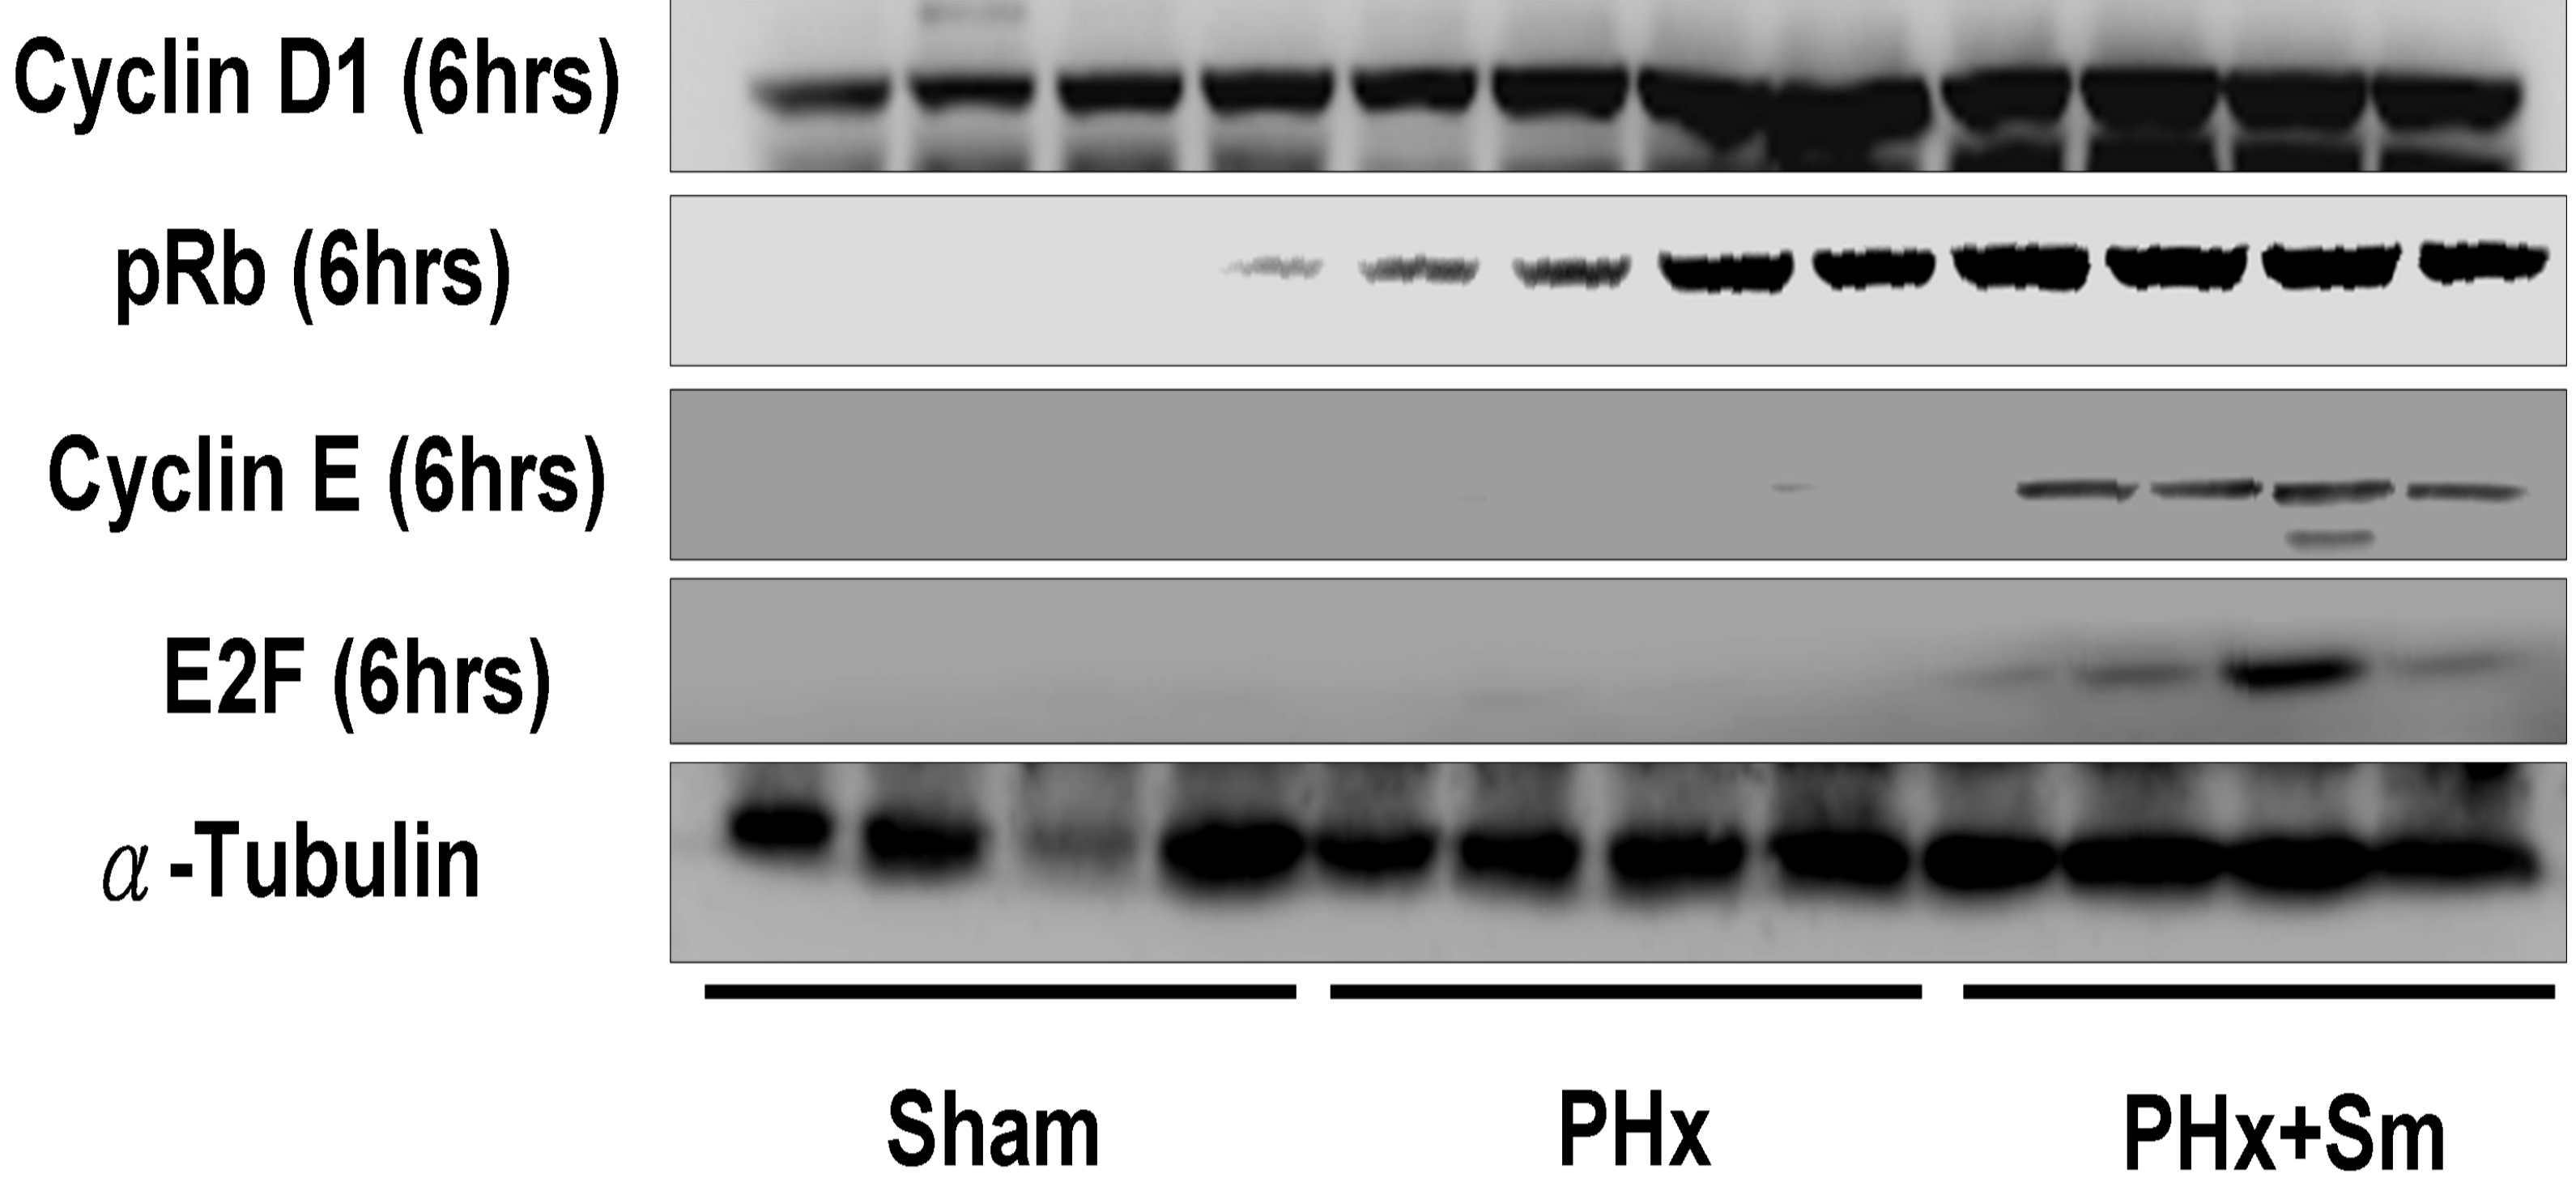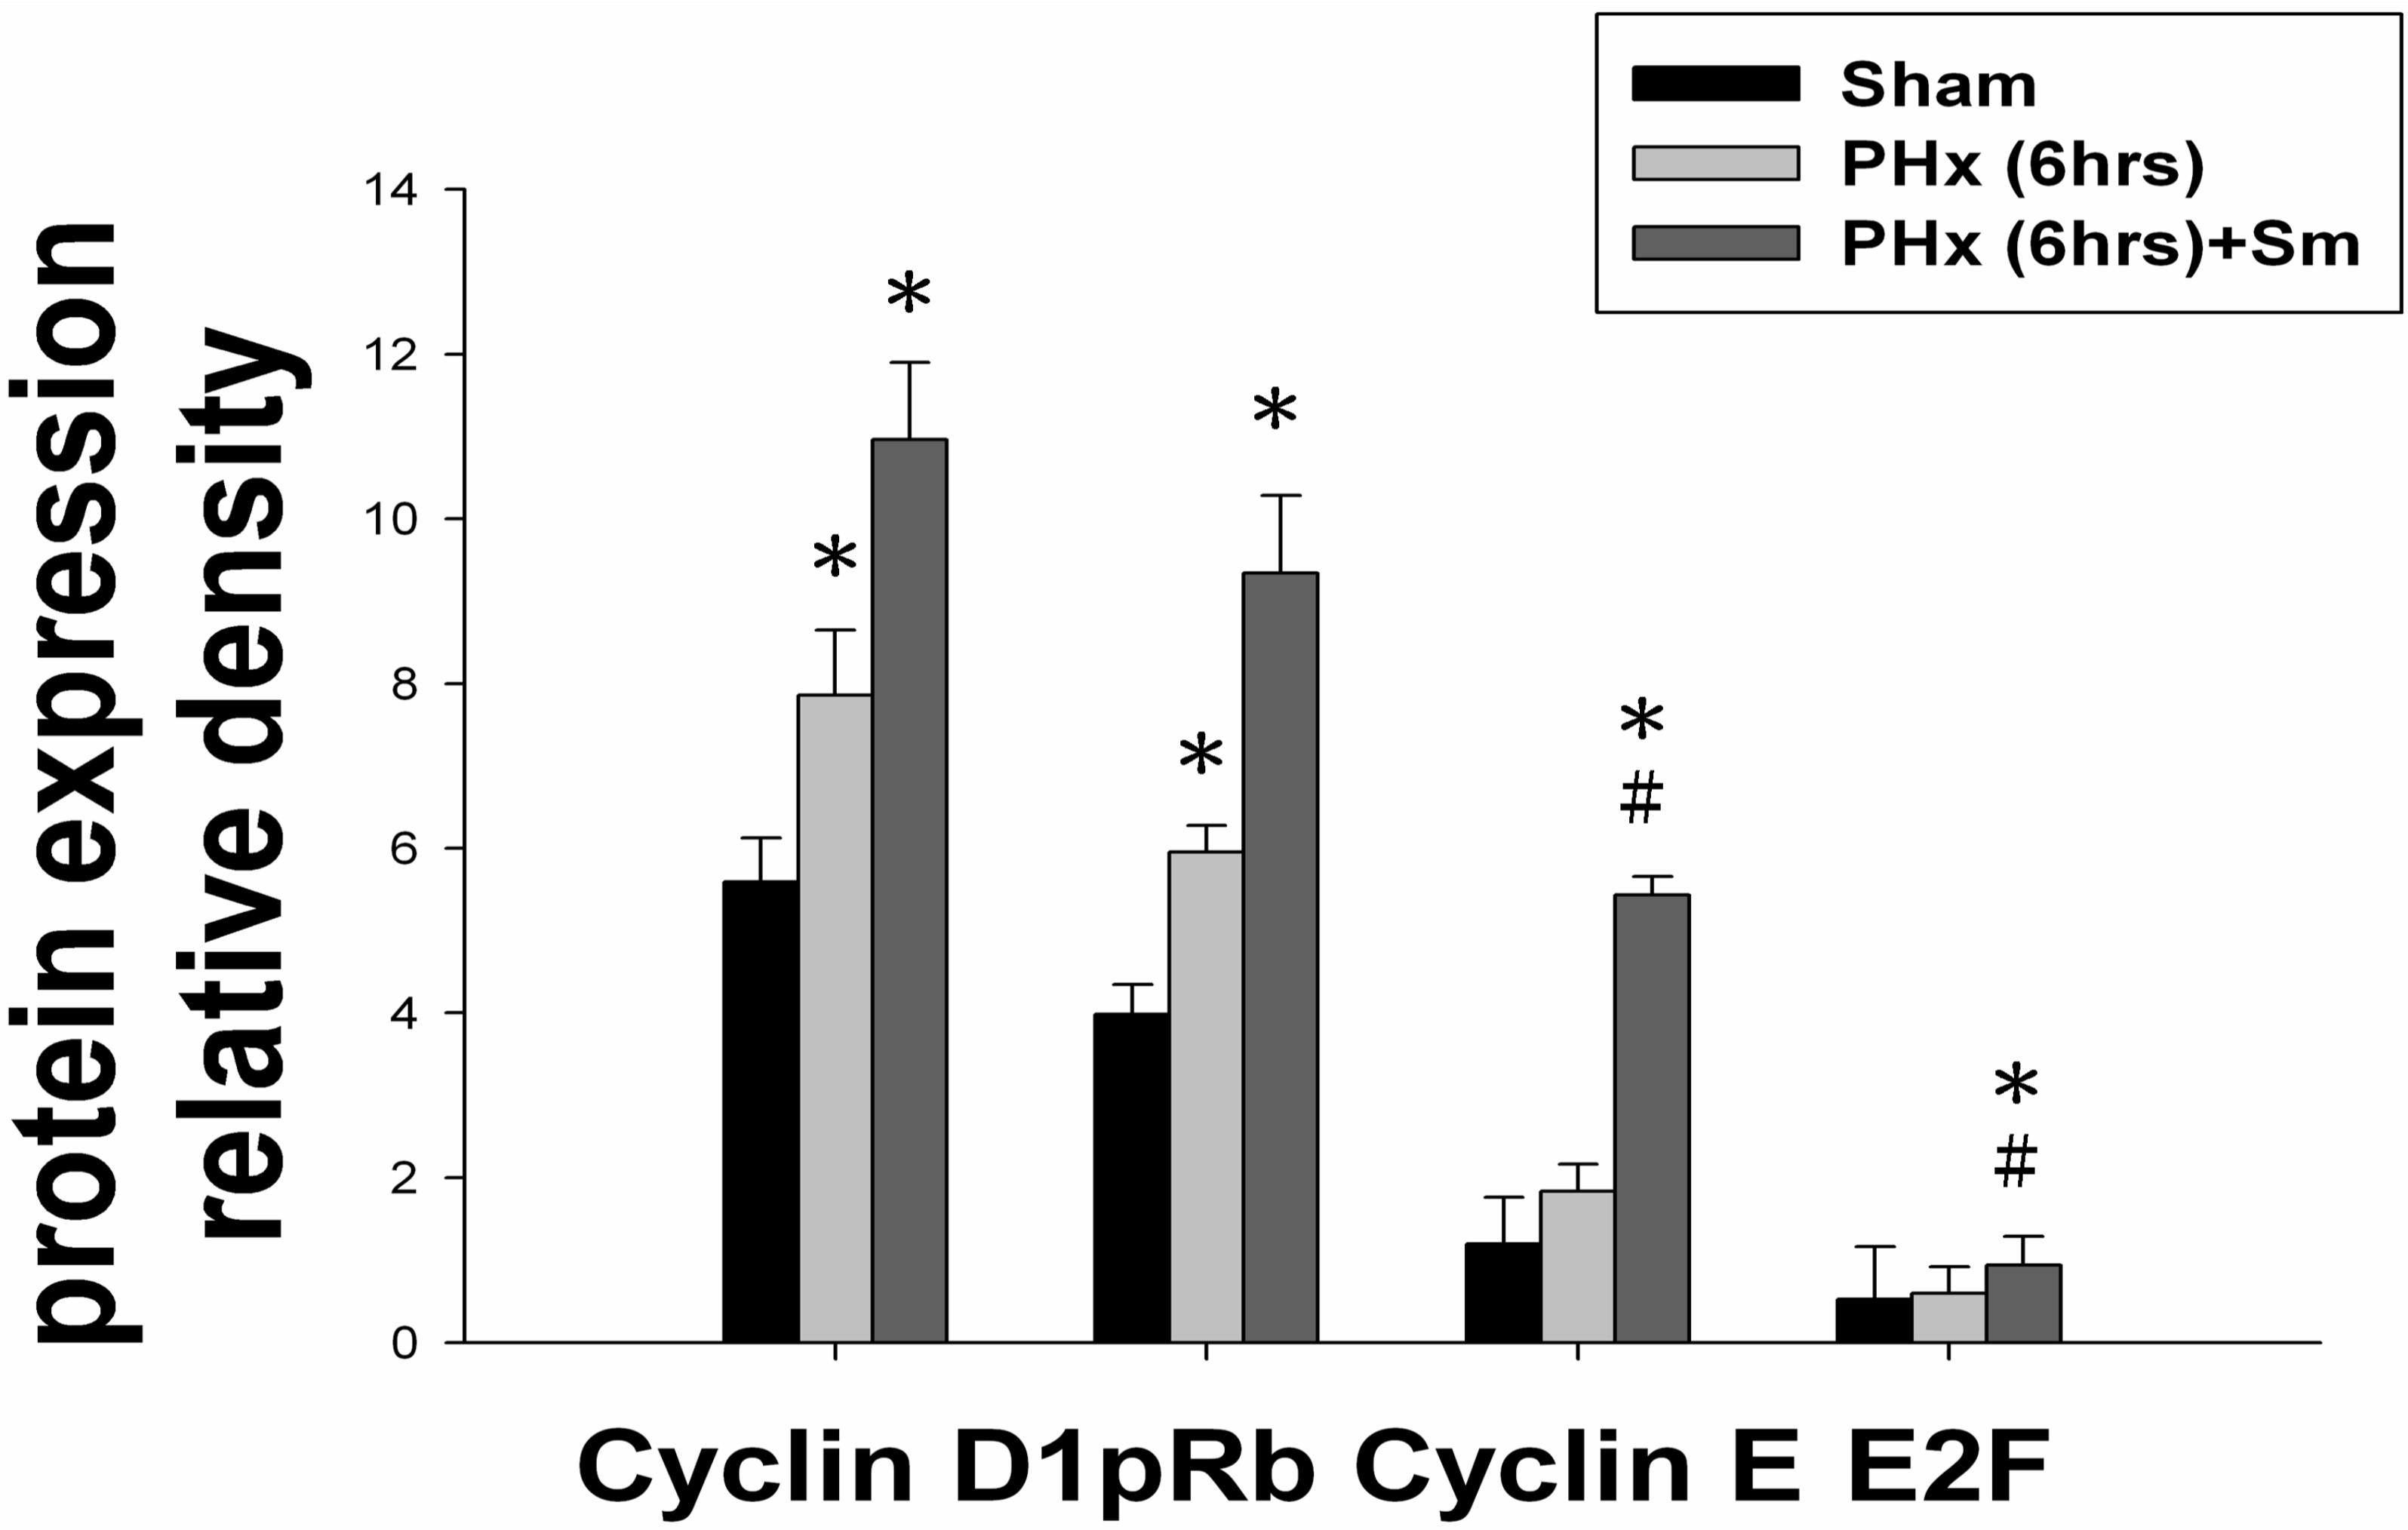**B**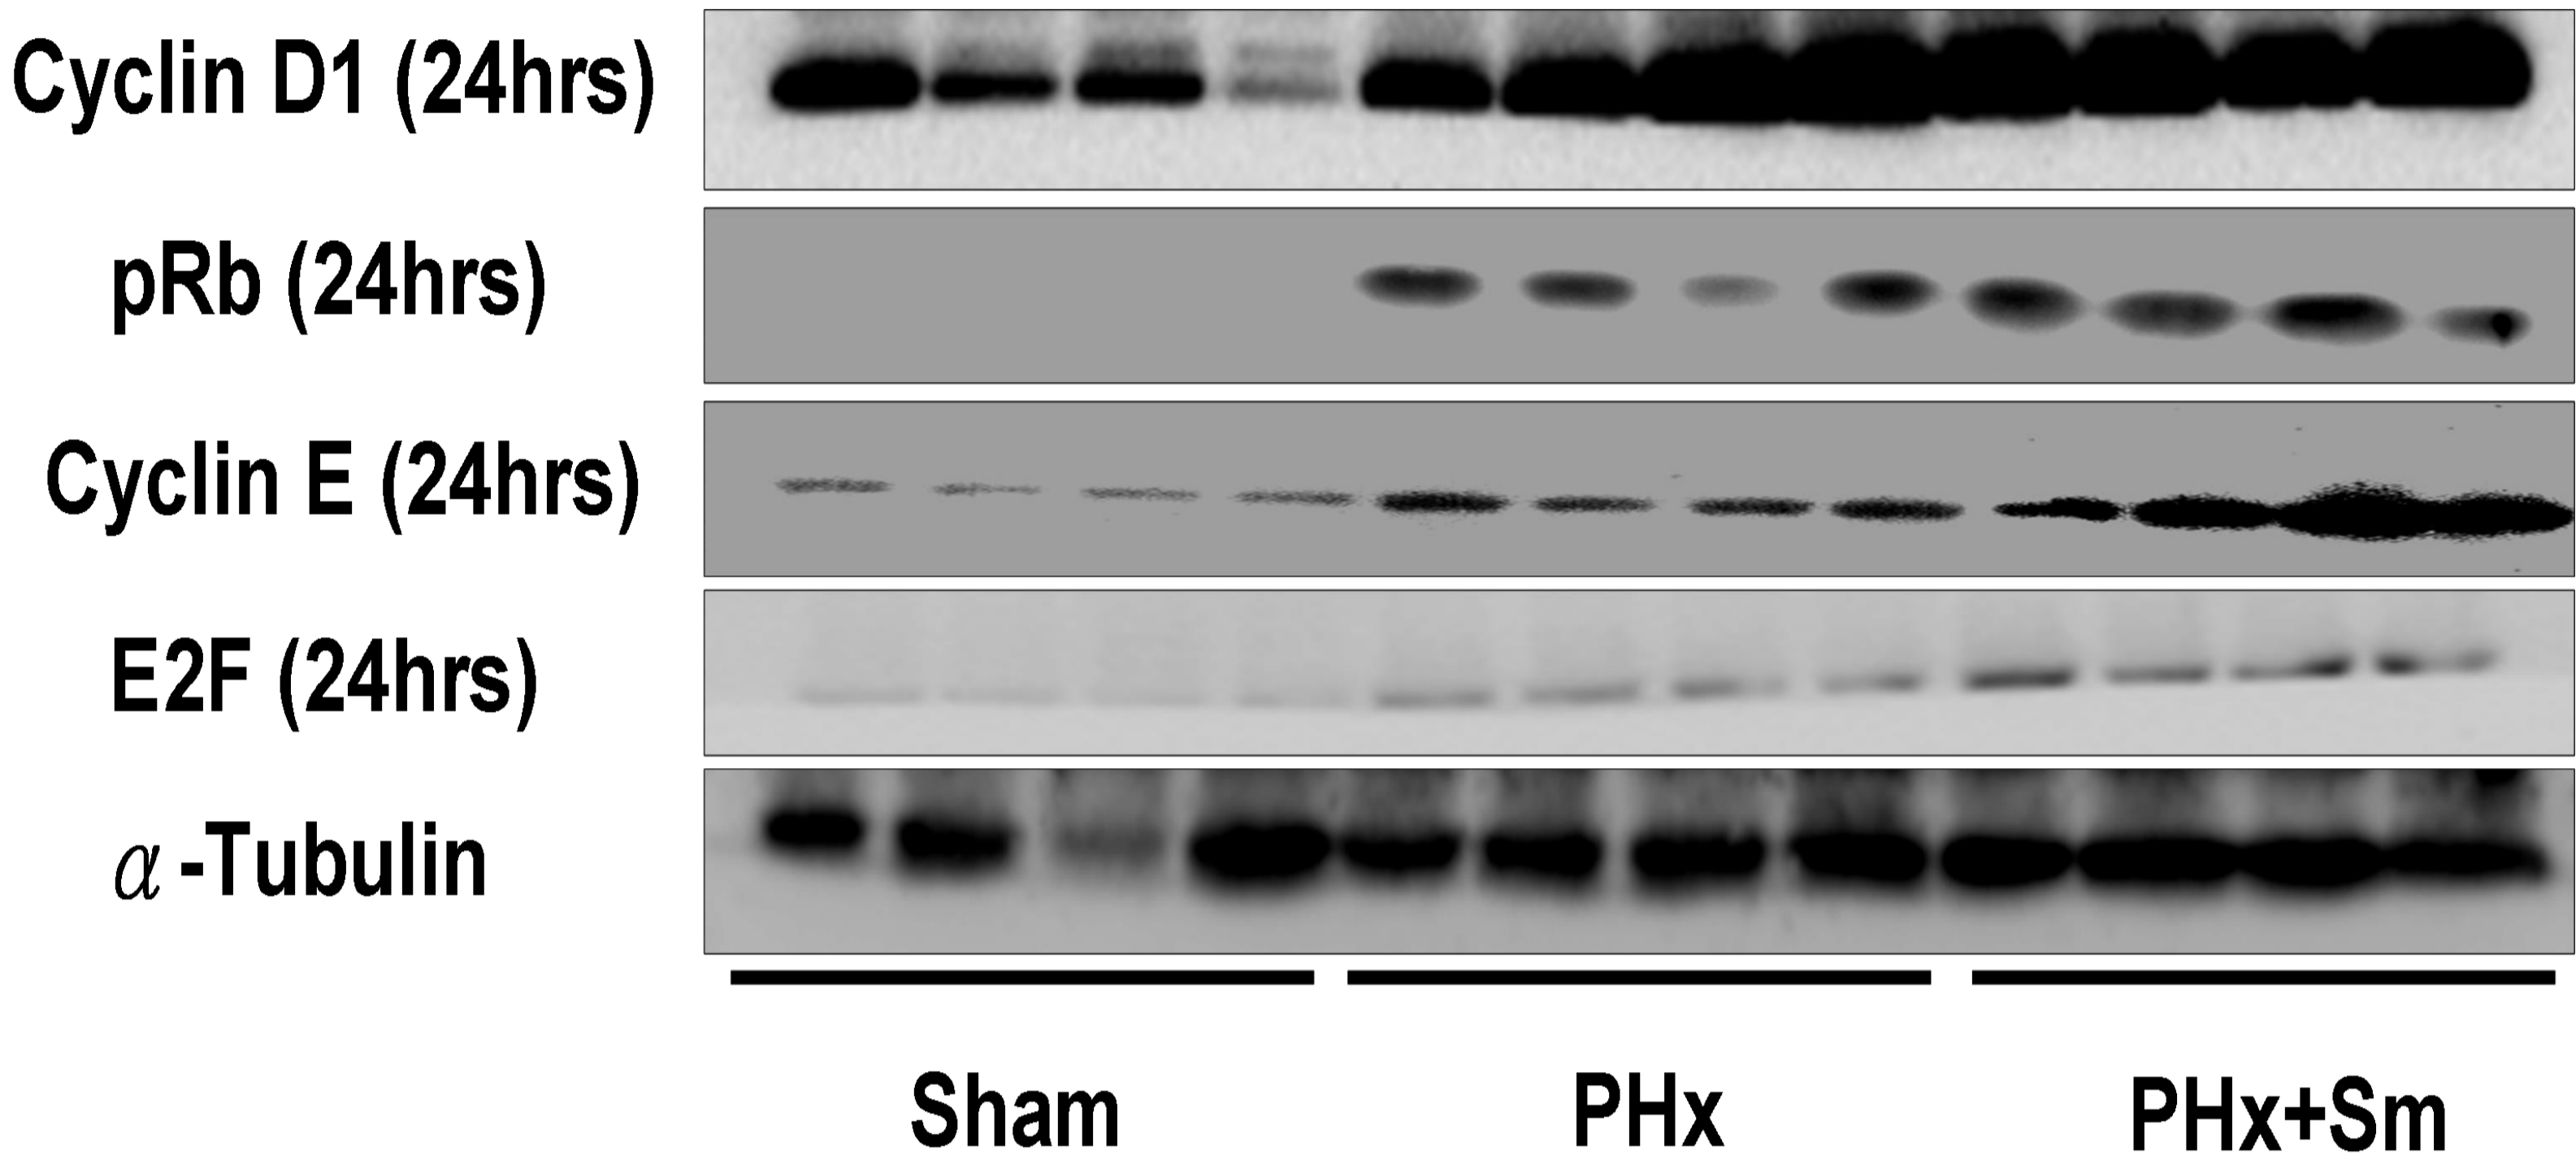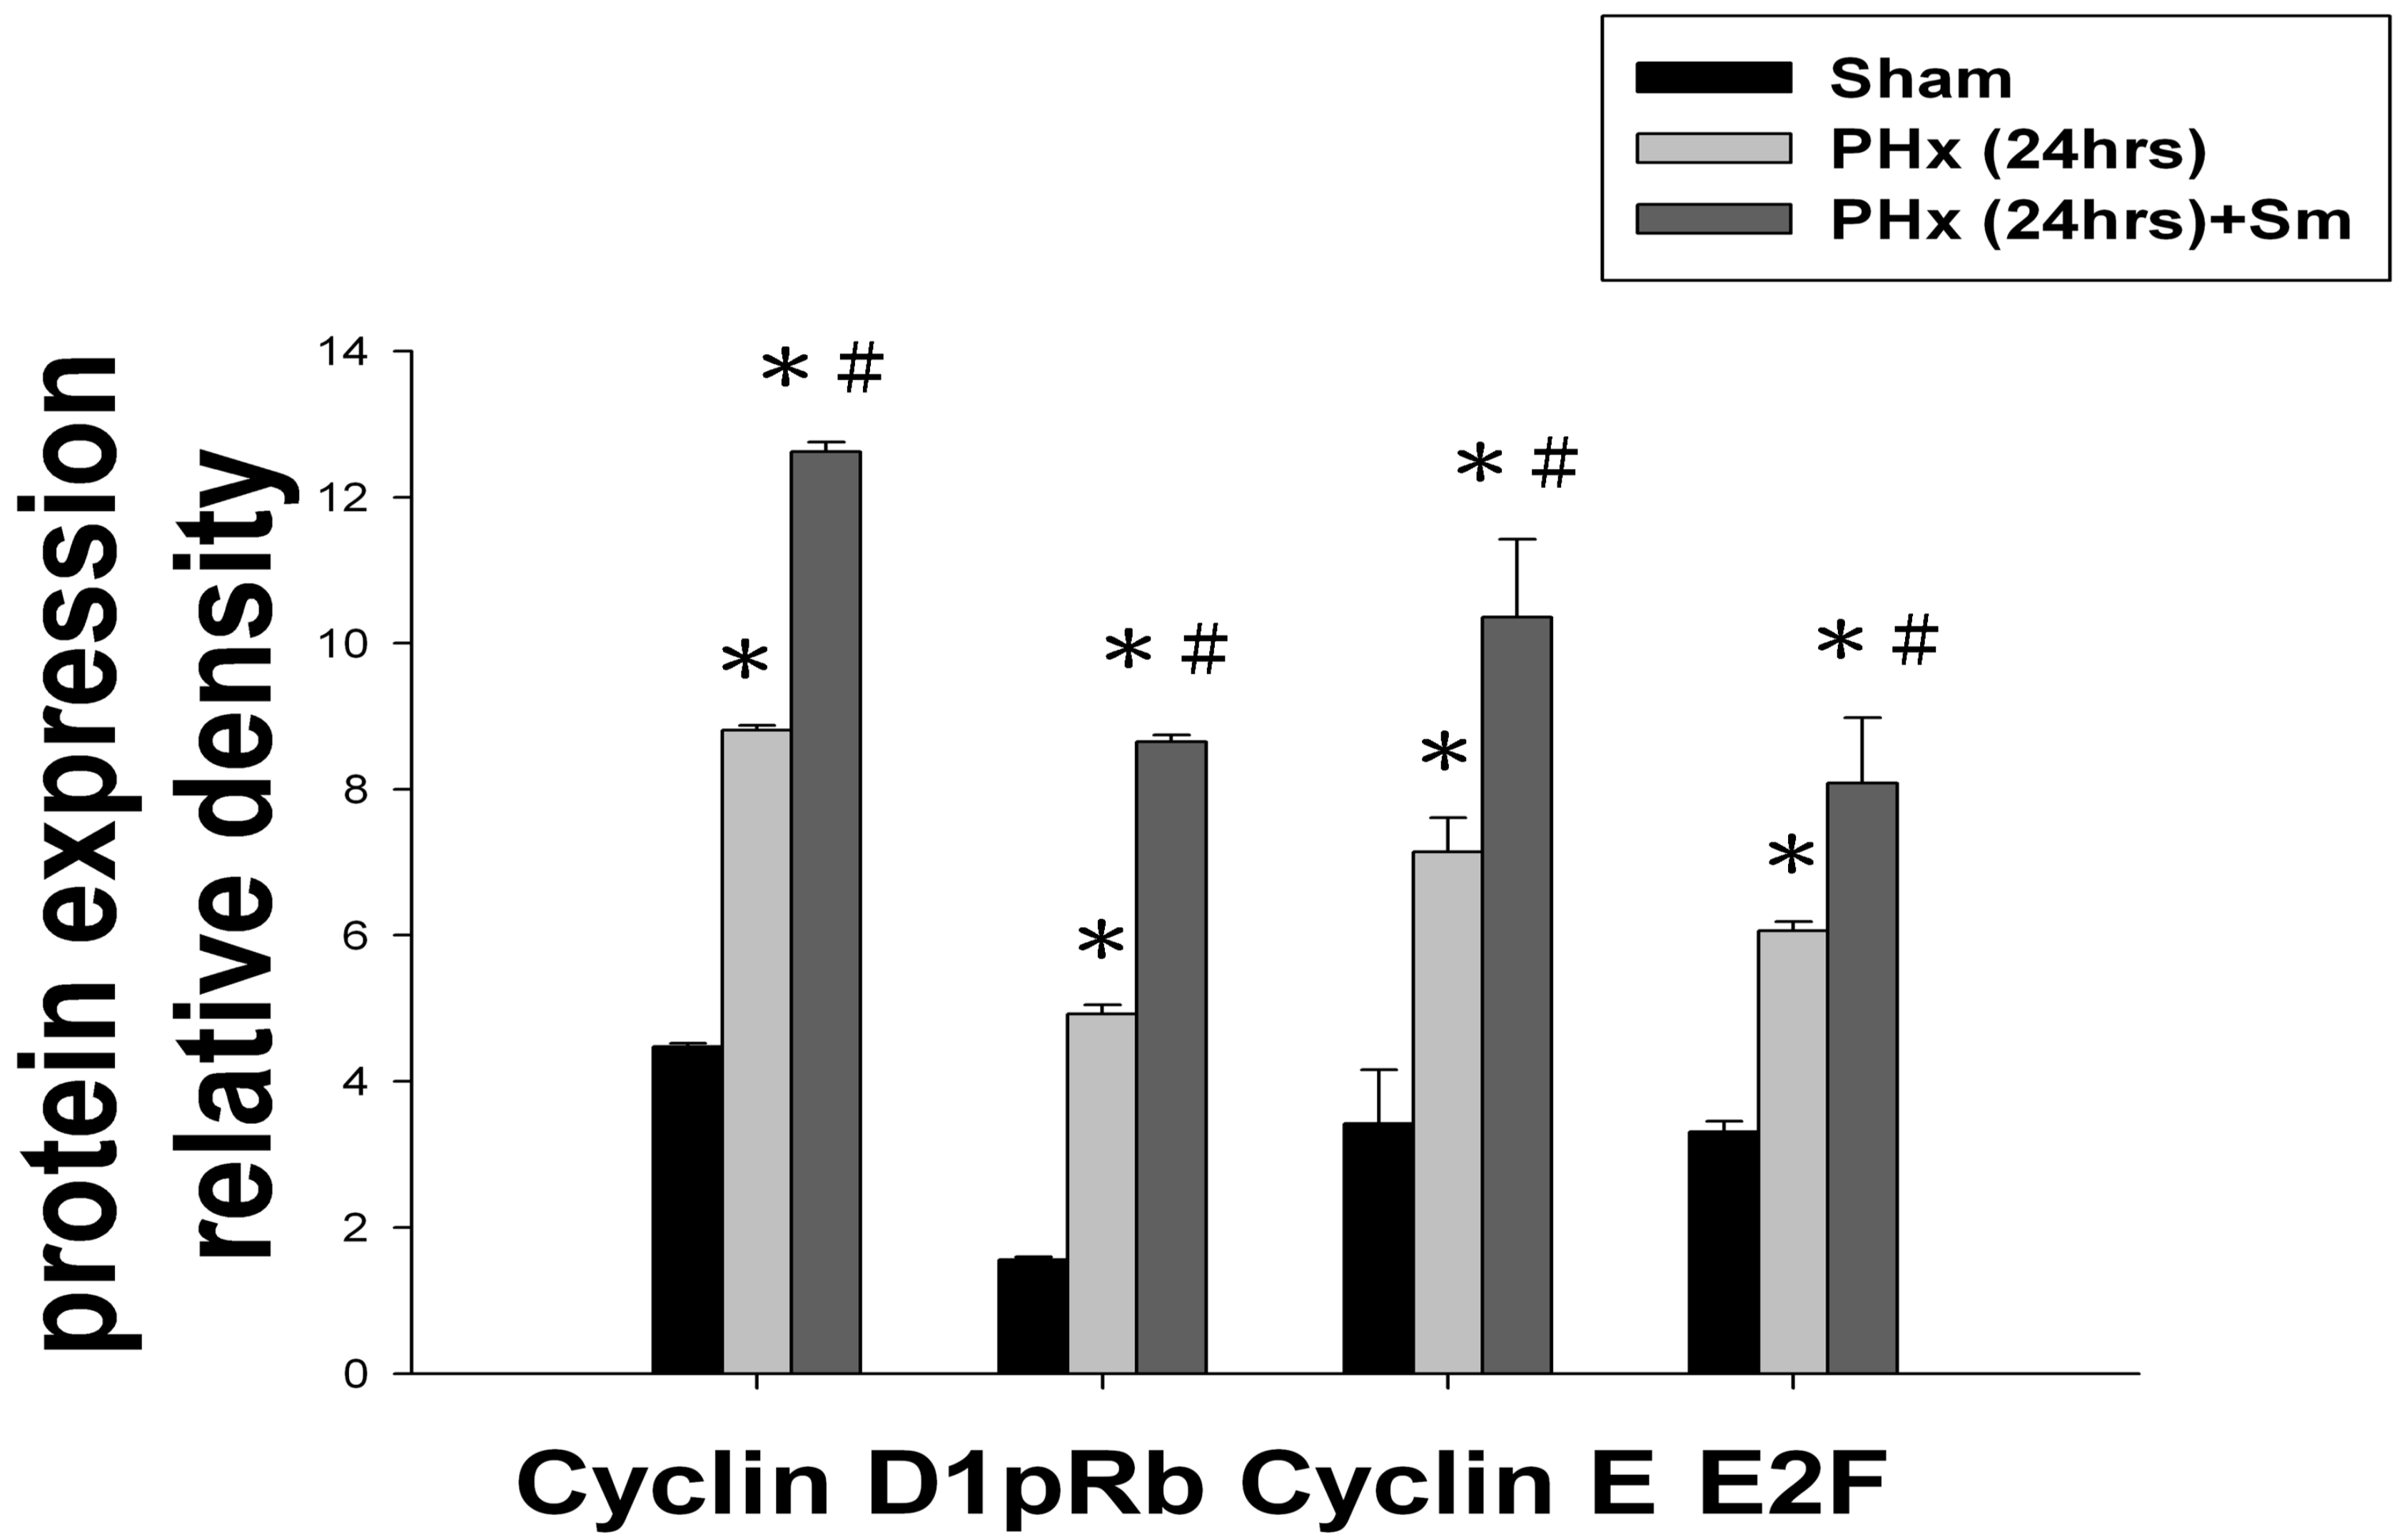**C**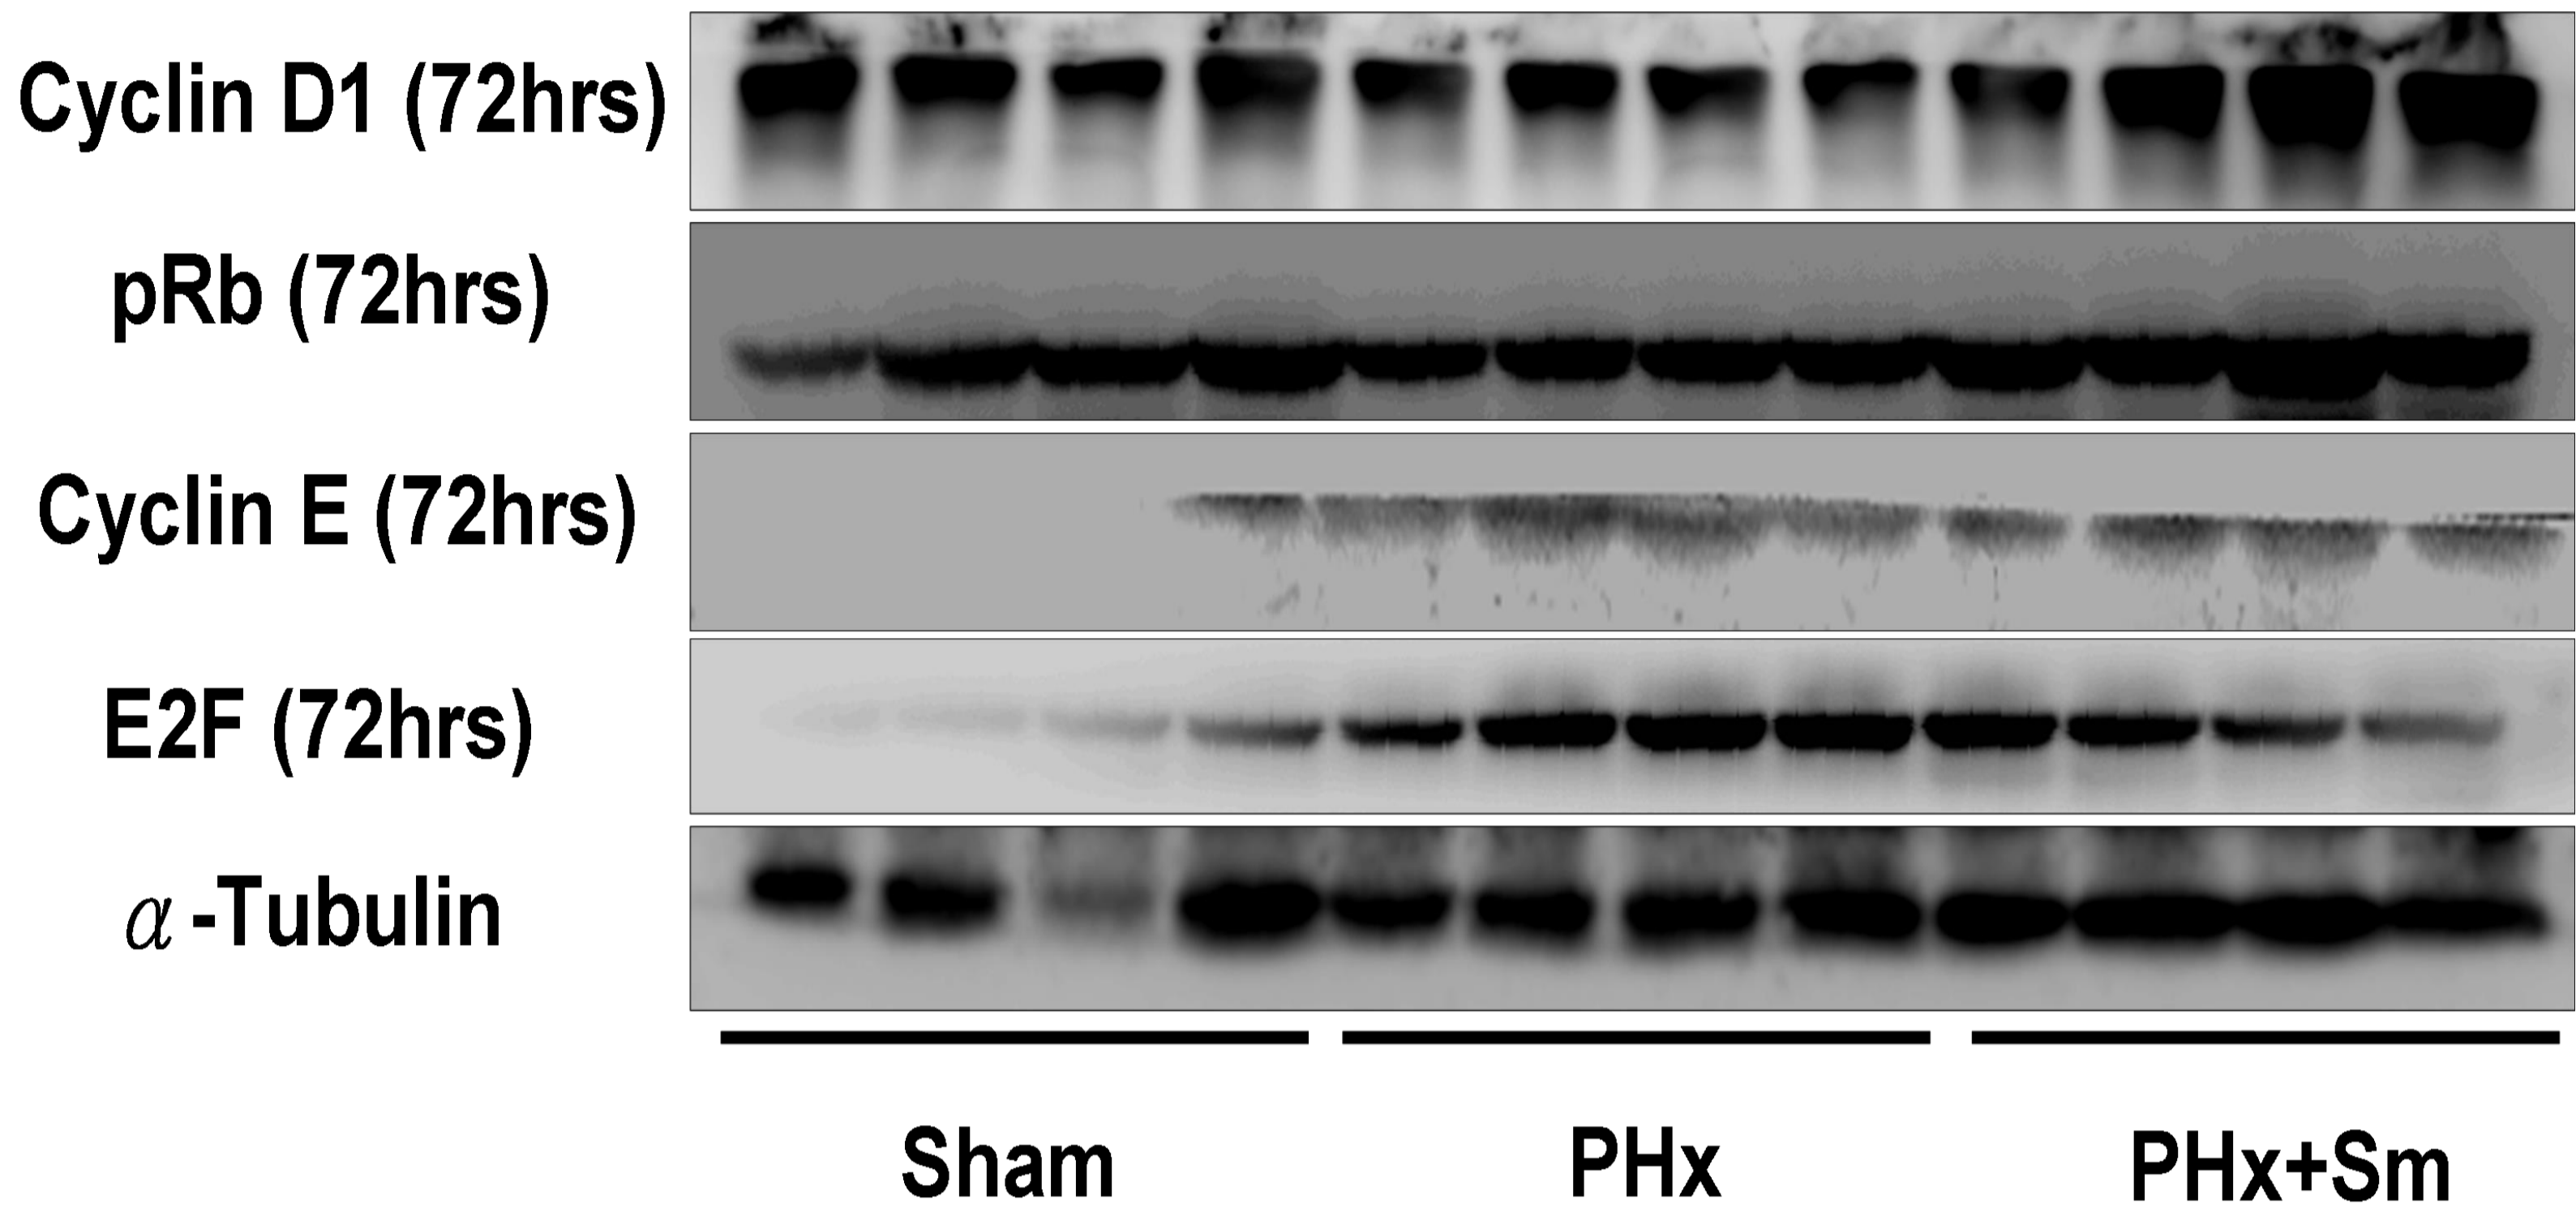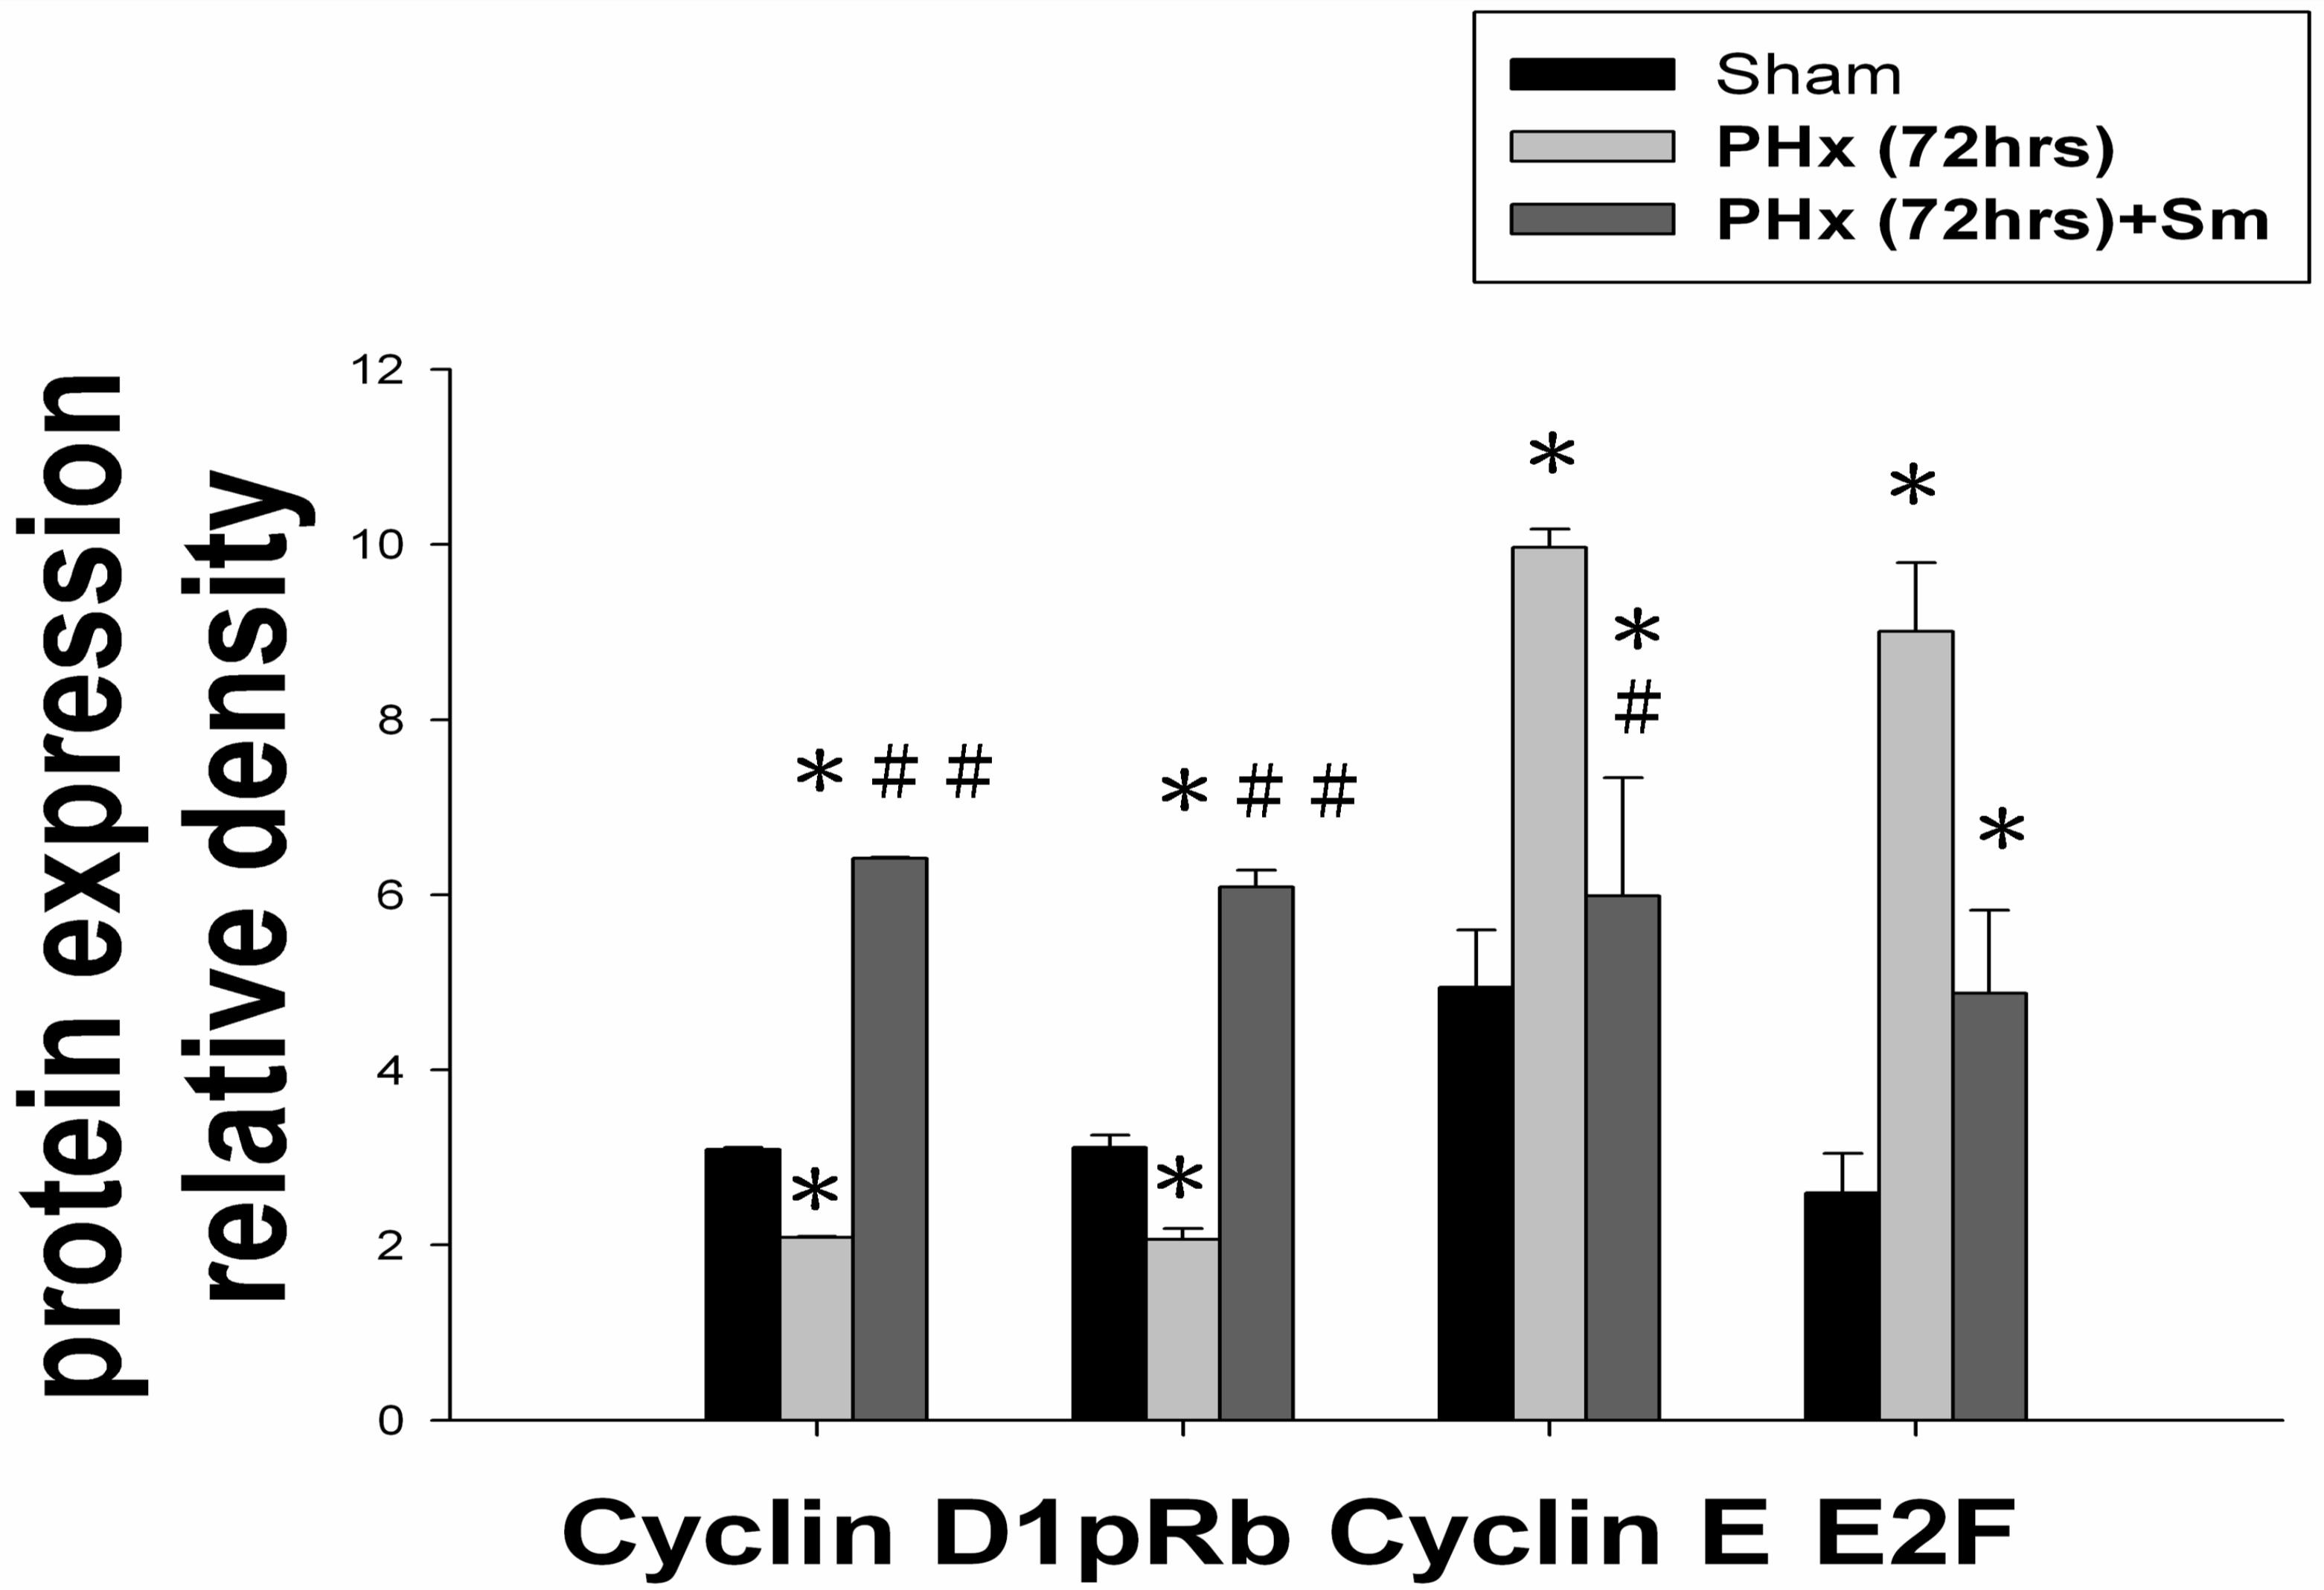

A

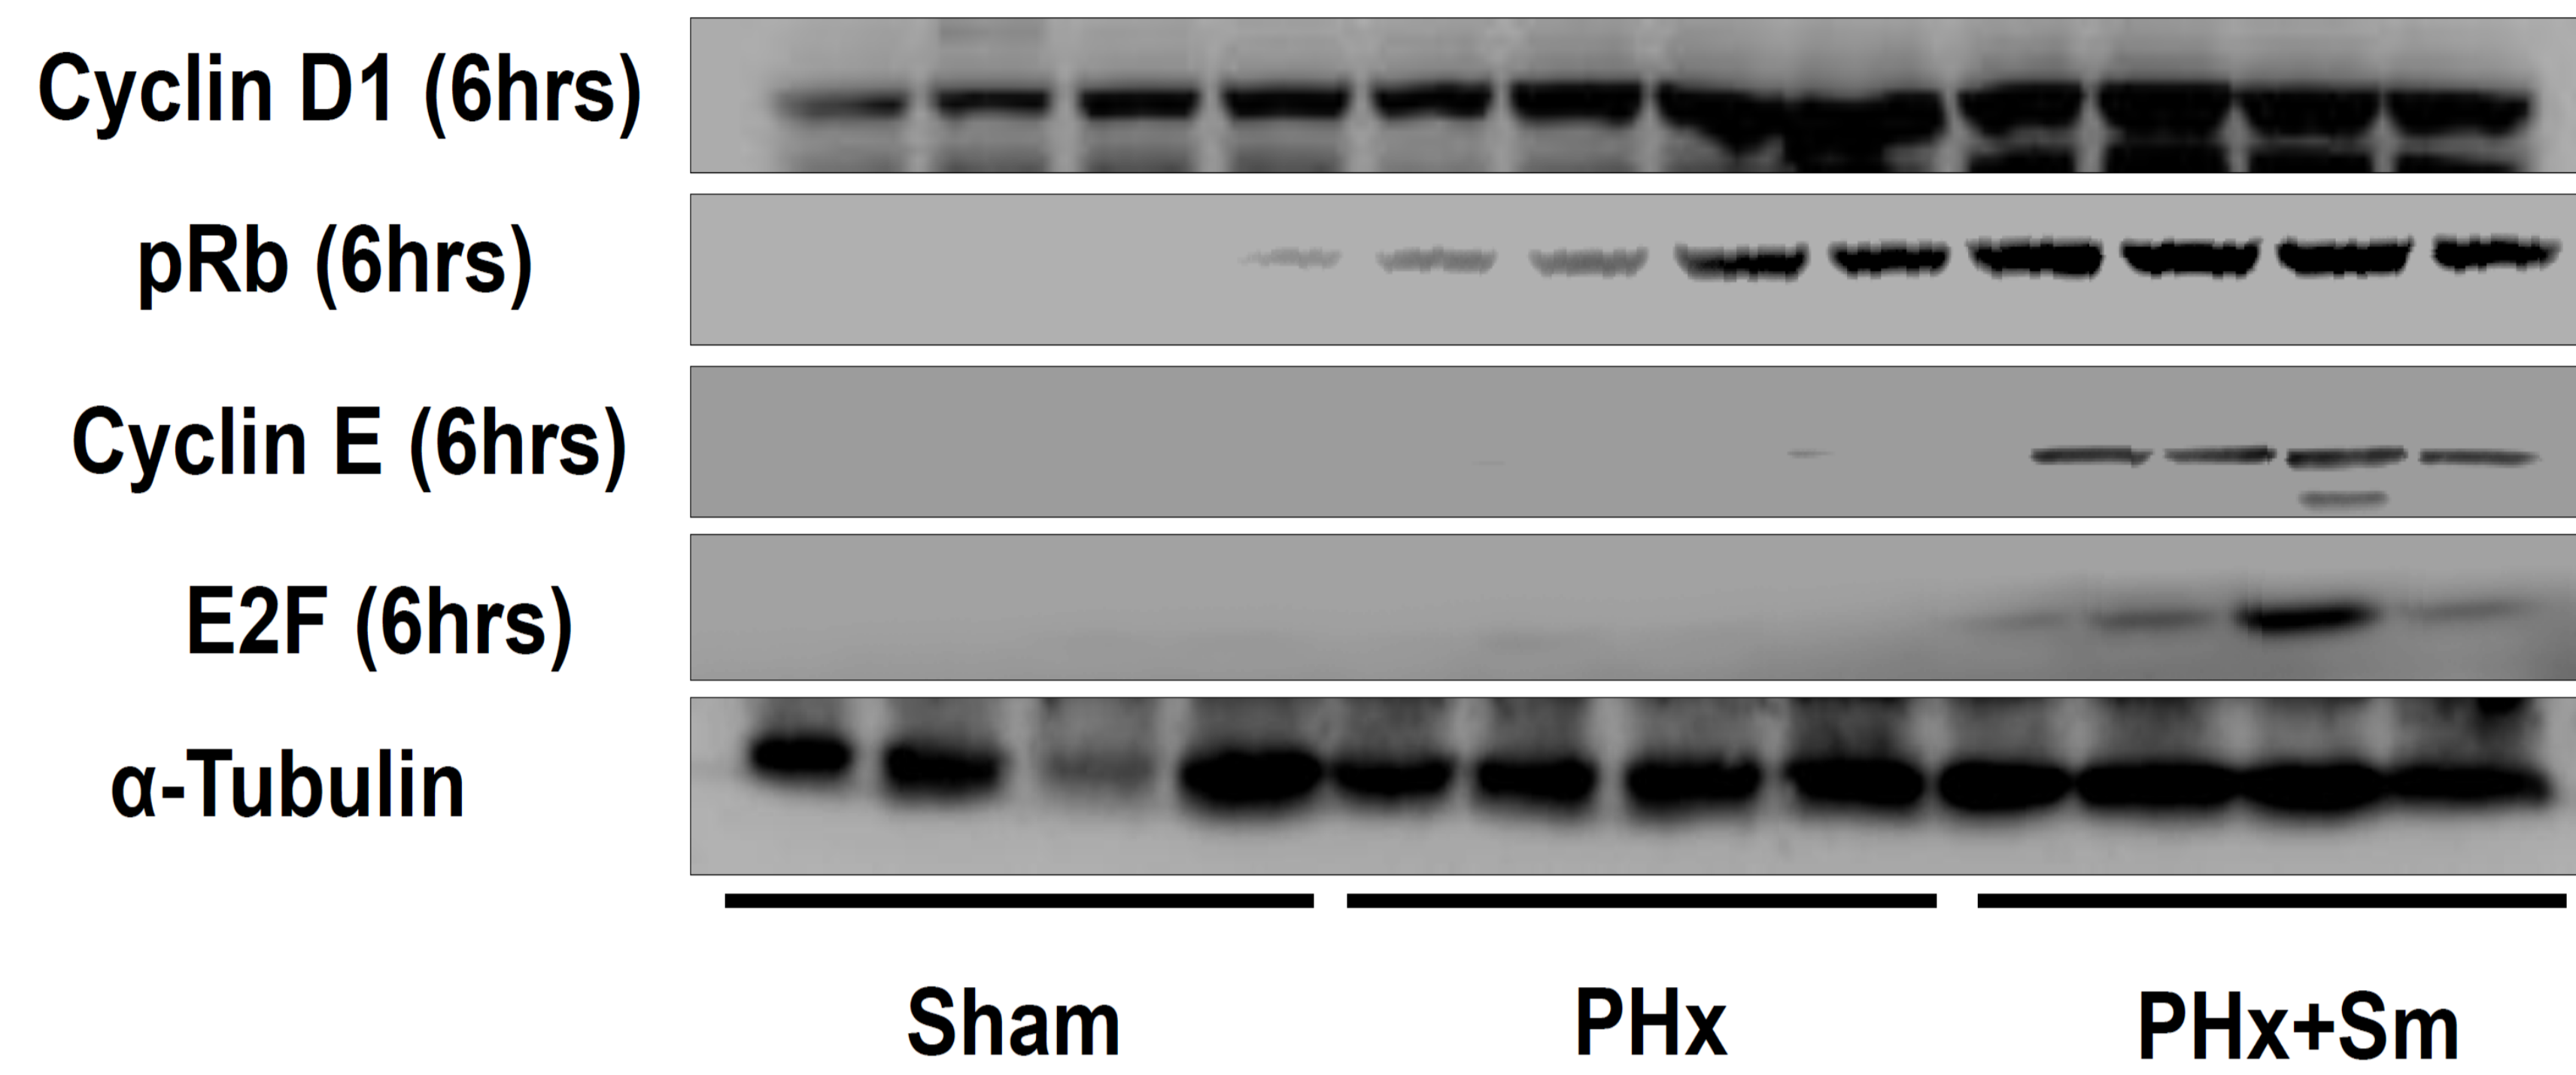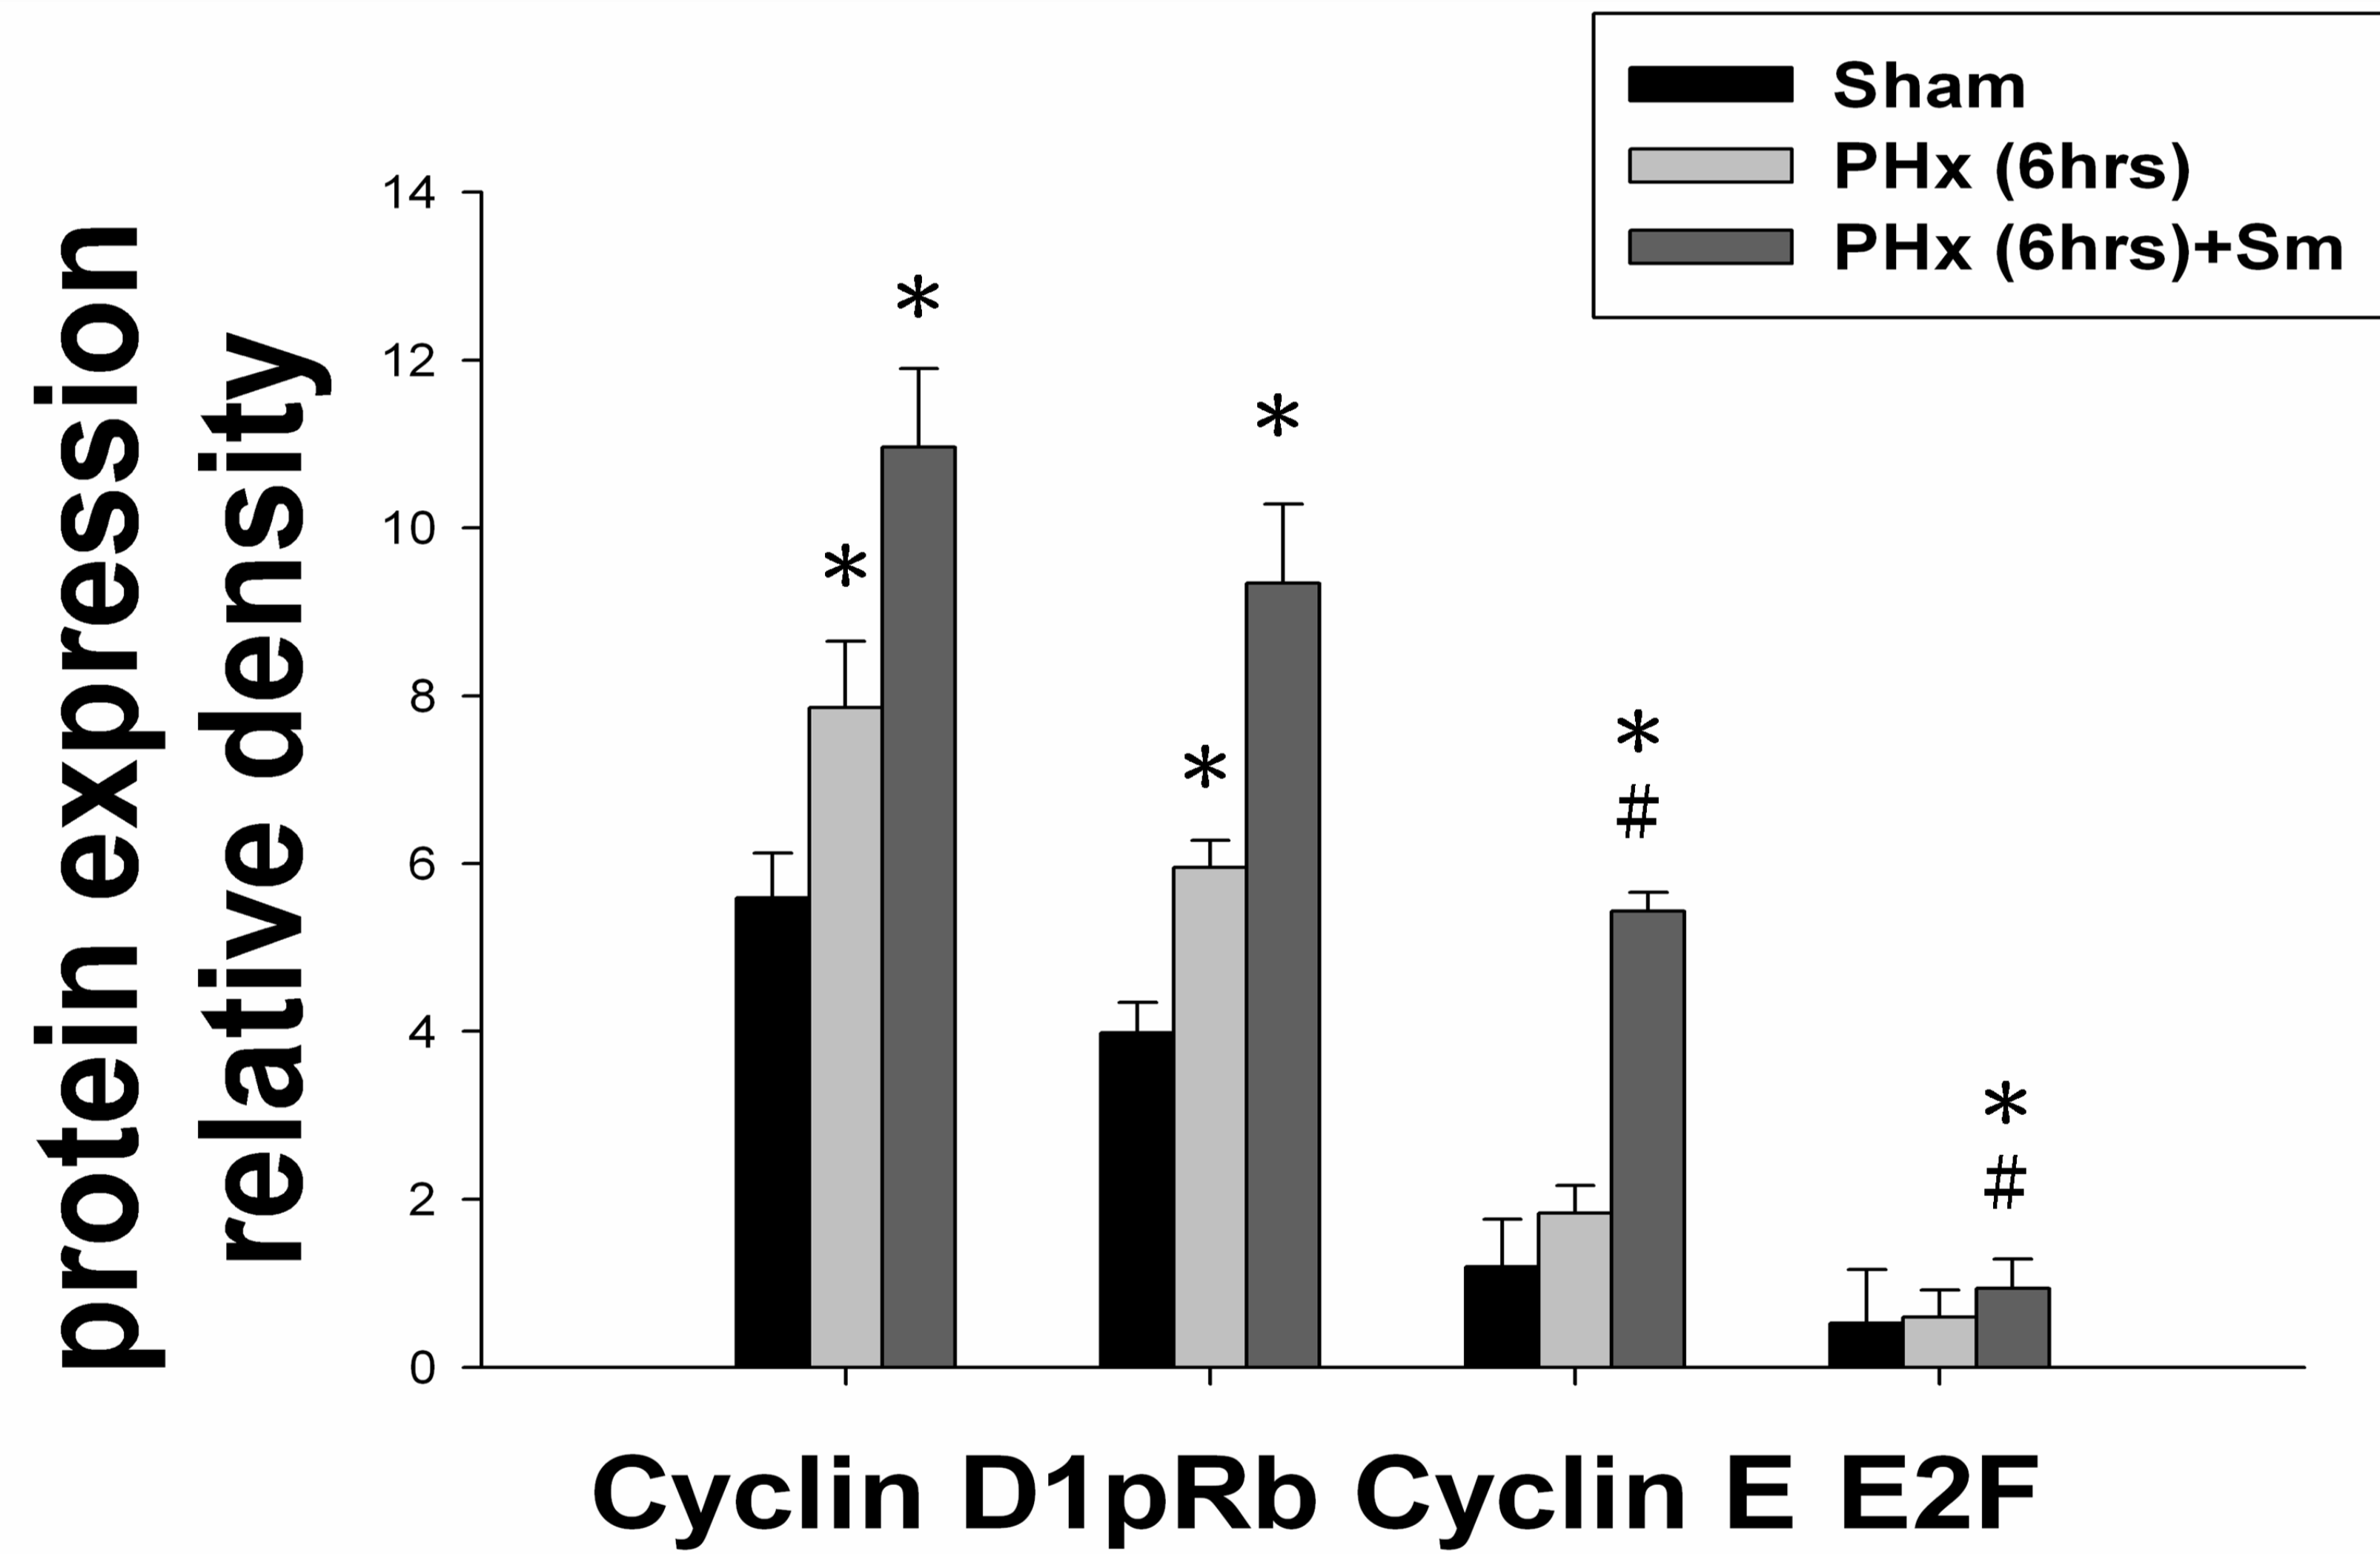

B

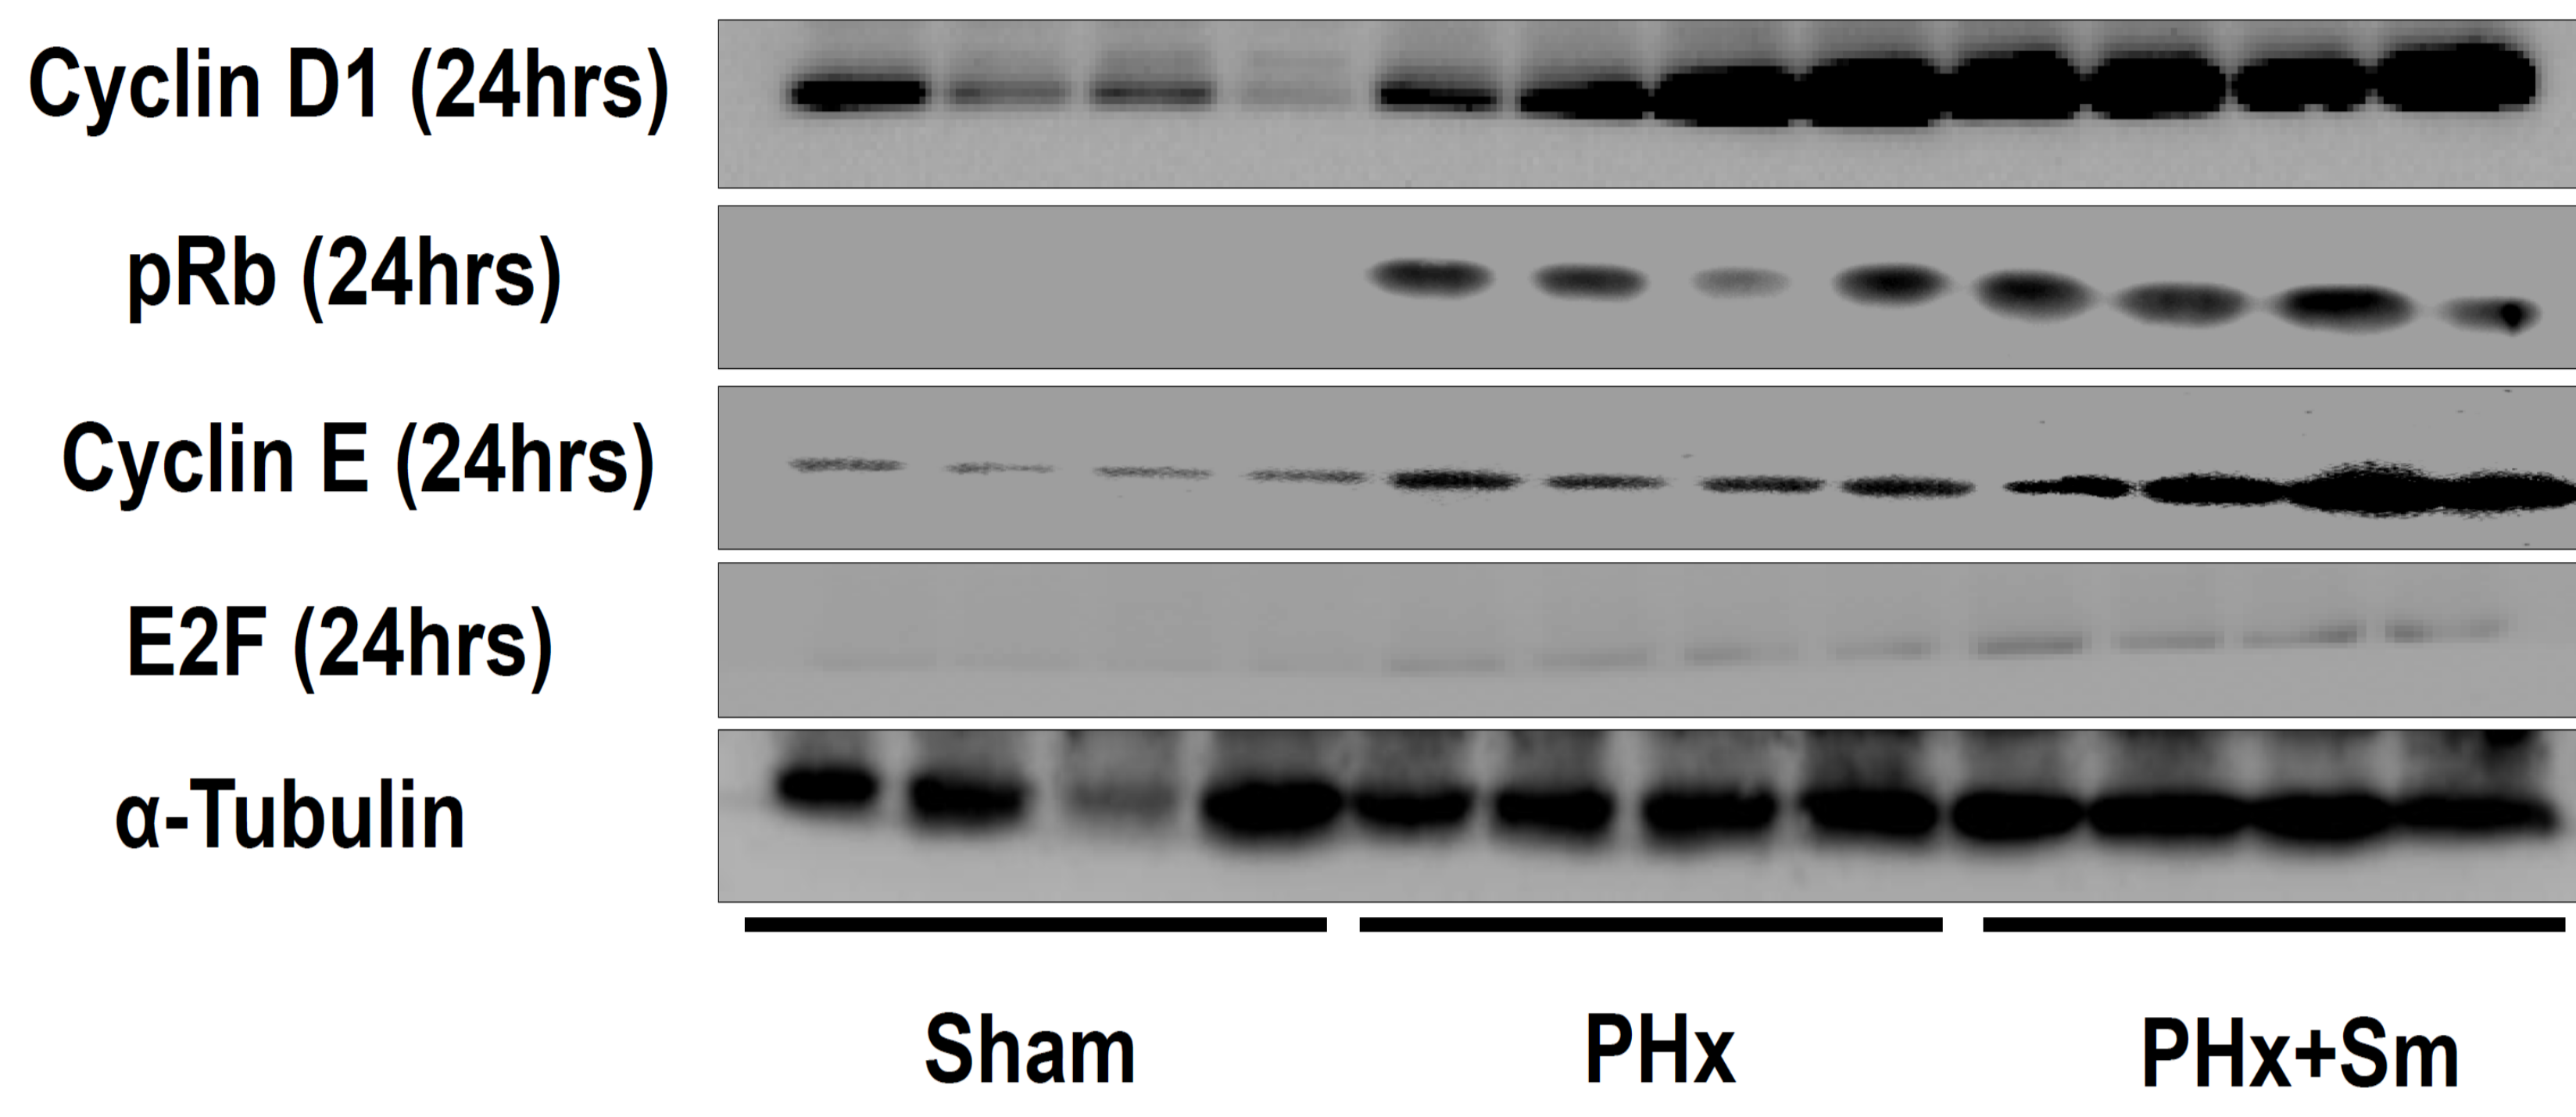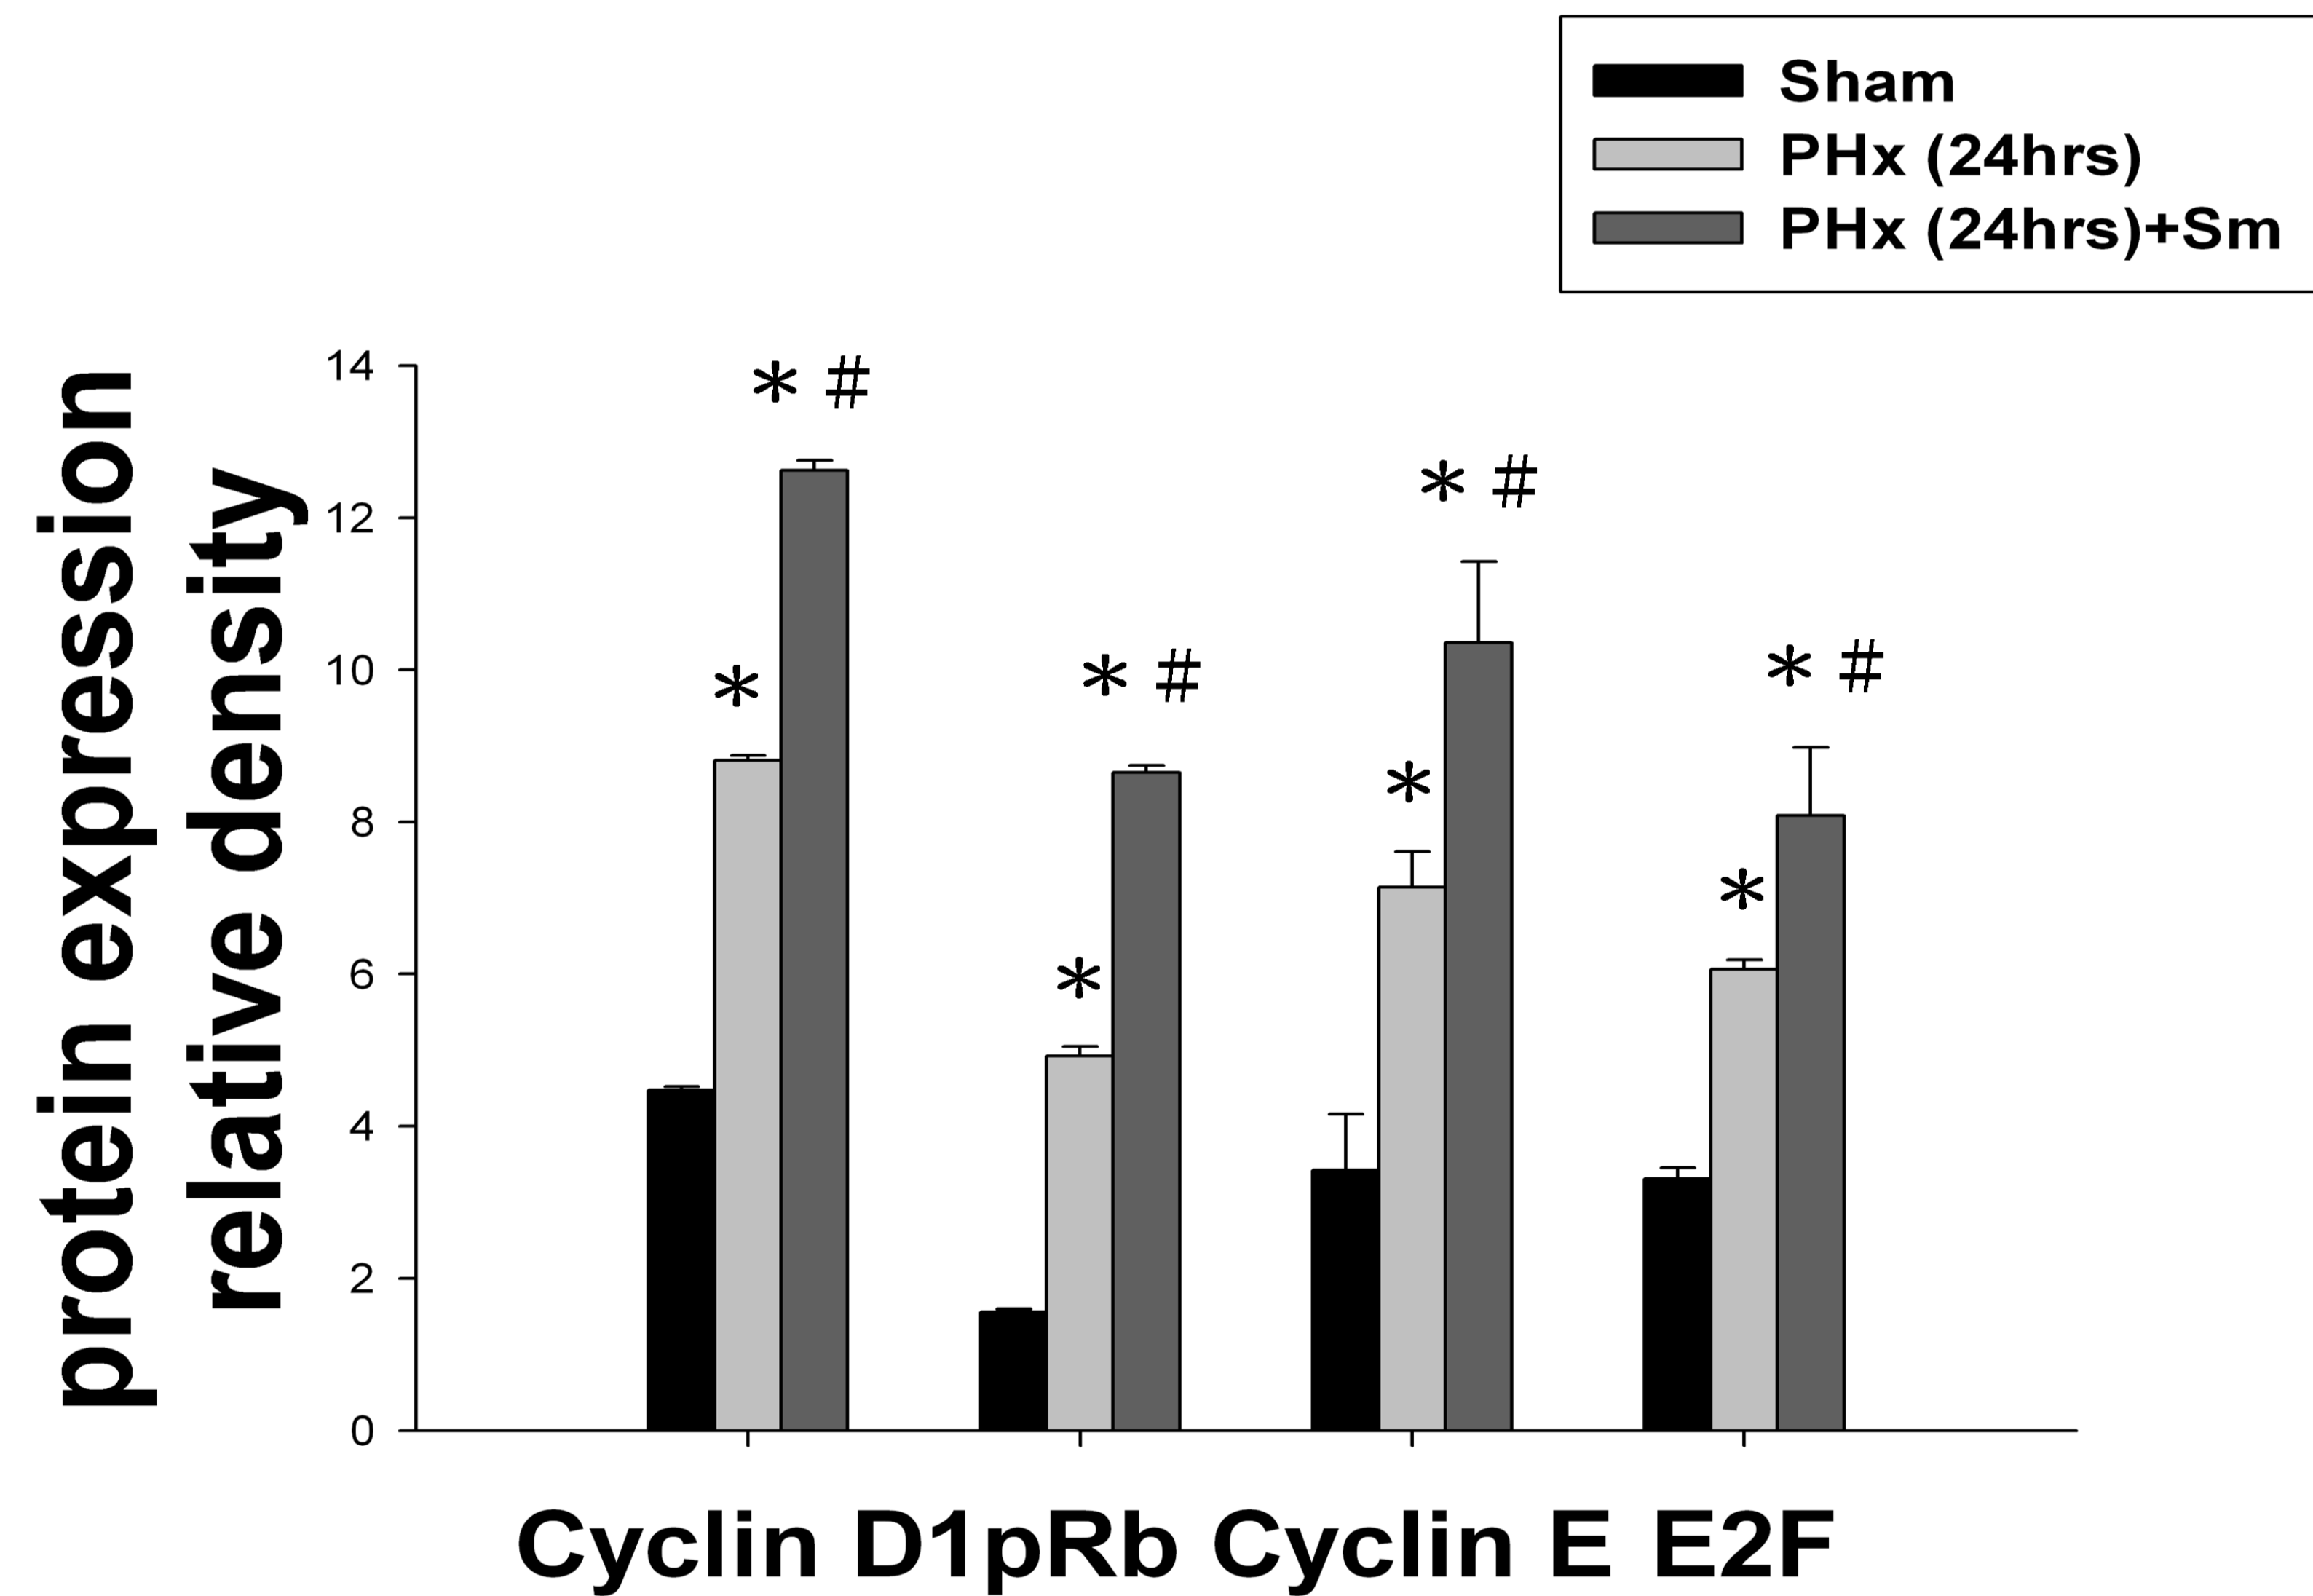

C

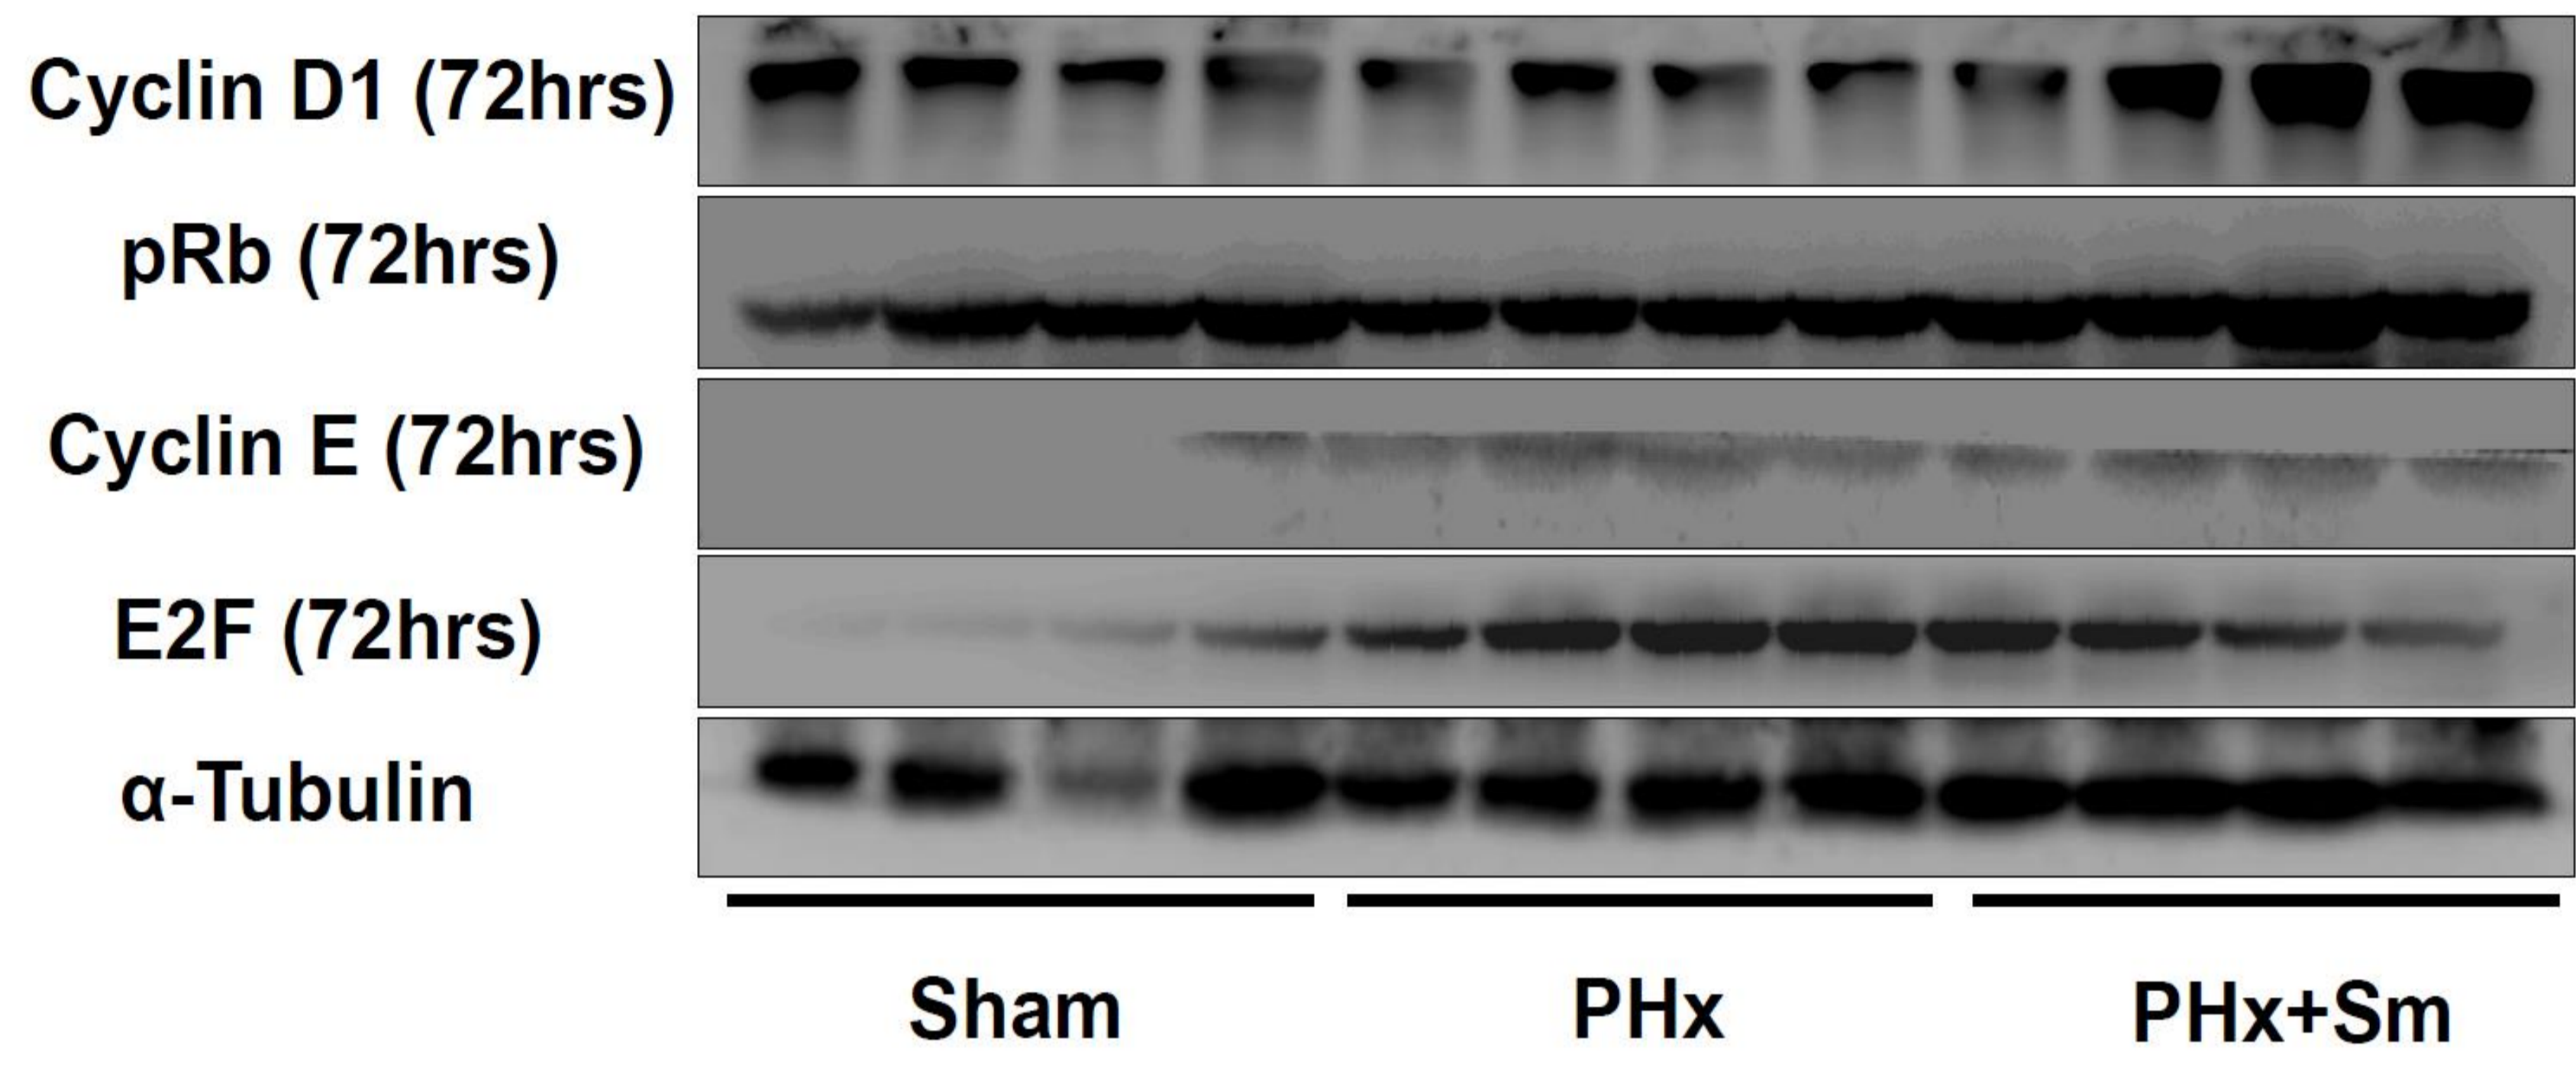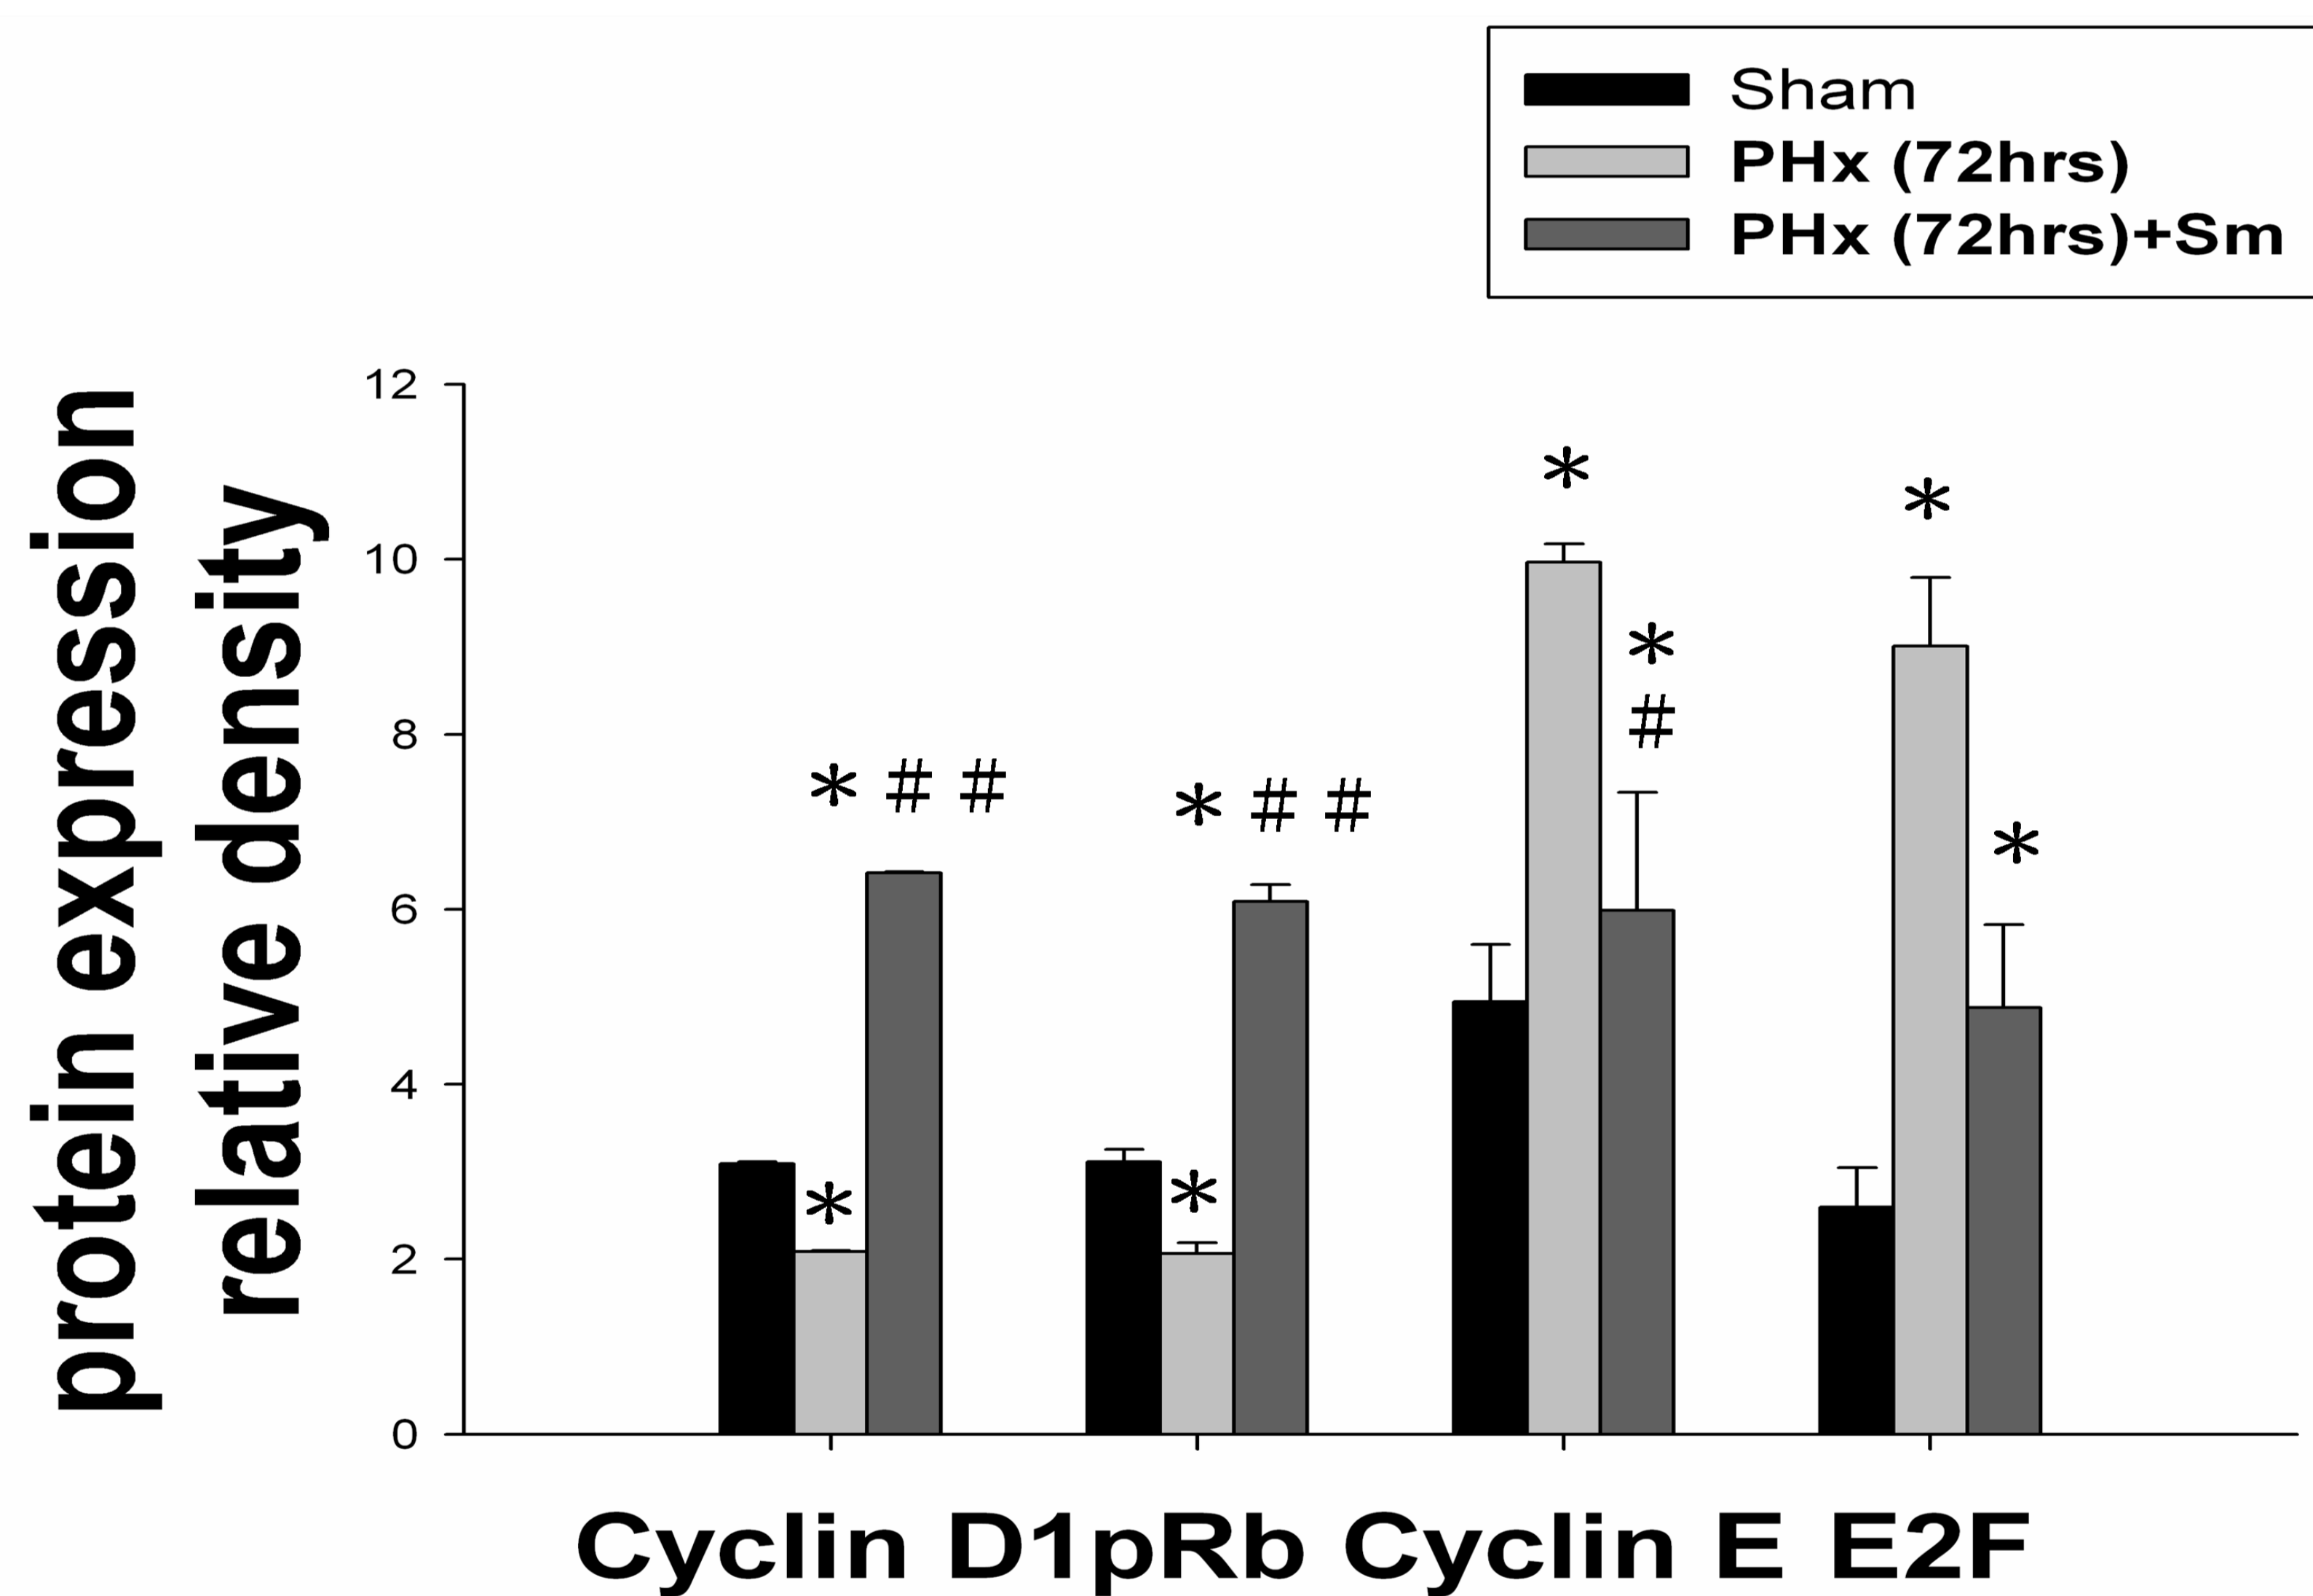

new
