# Supplementary figures and images for: Retracted: Silymarin Accelerates Liver Regeneration after Partial Hepatectomy
Source: Hindawi journal article supplement (doi:10.1155/2017/2575273), 2017-01-01

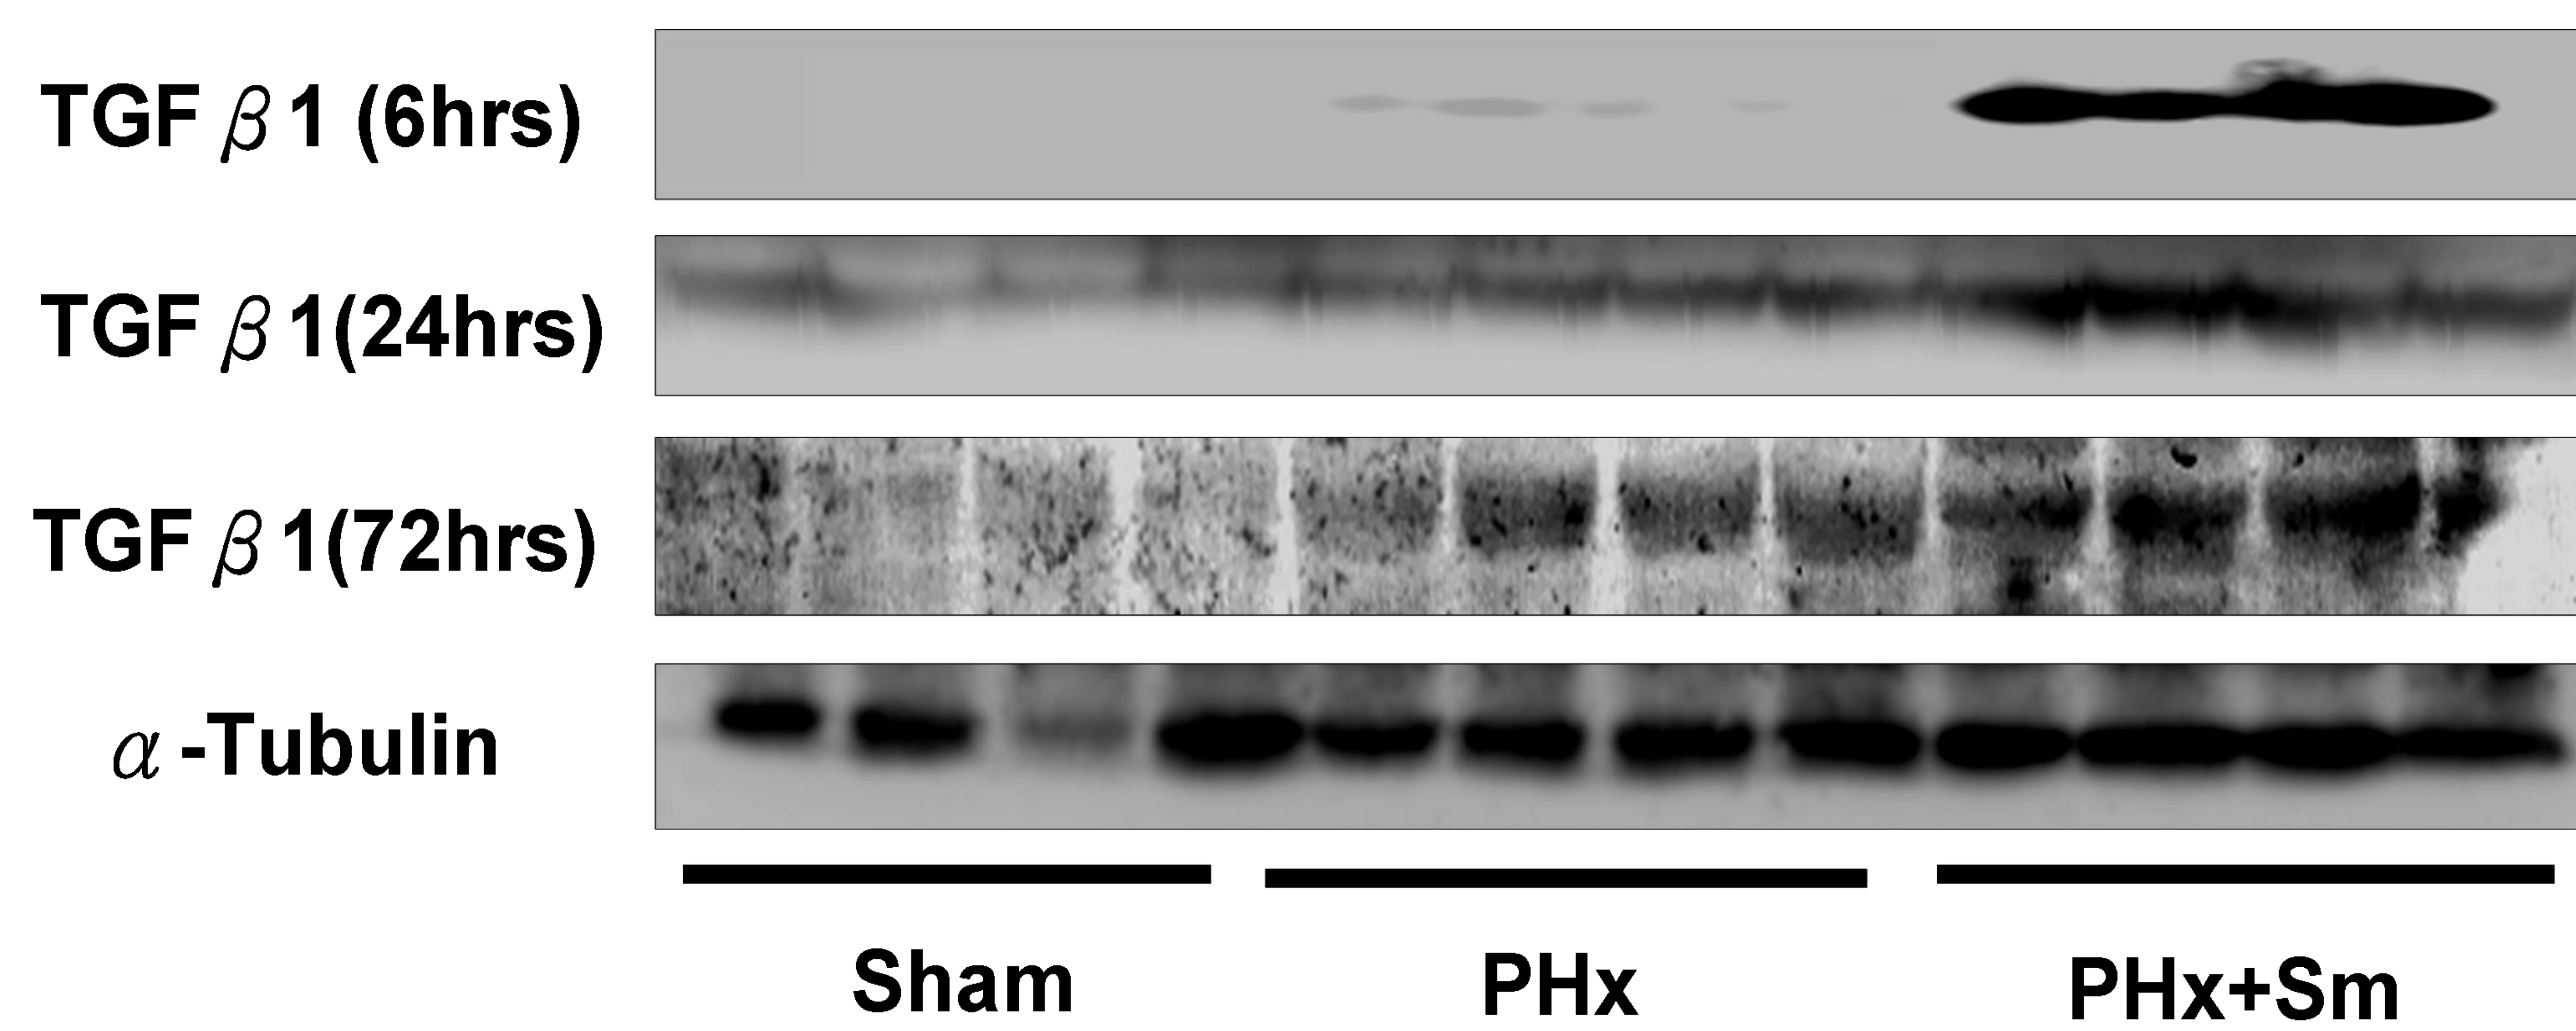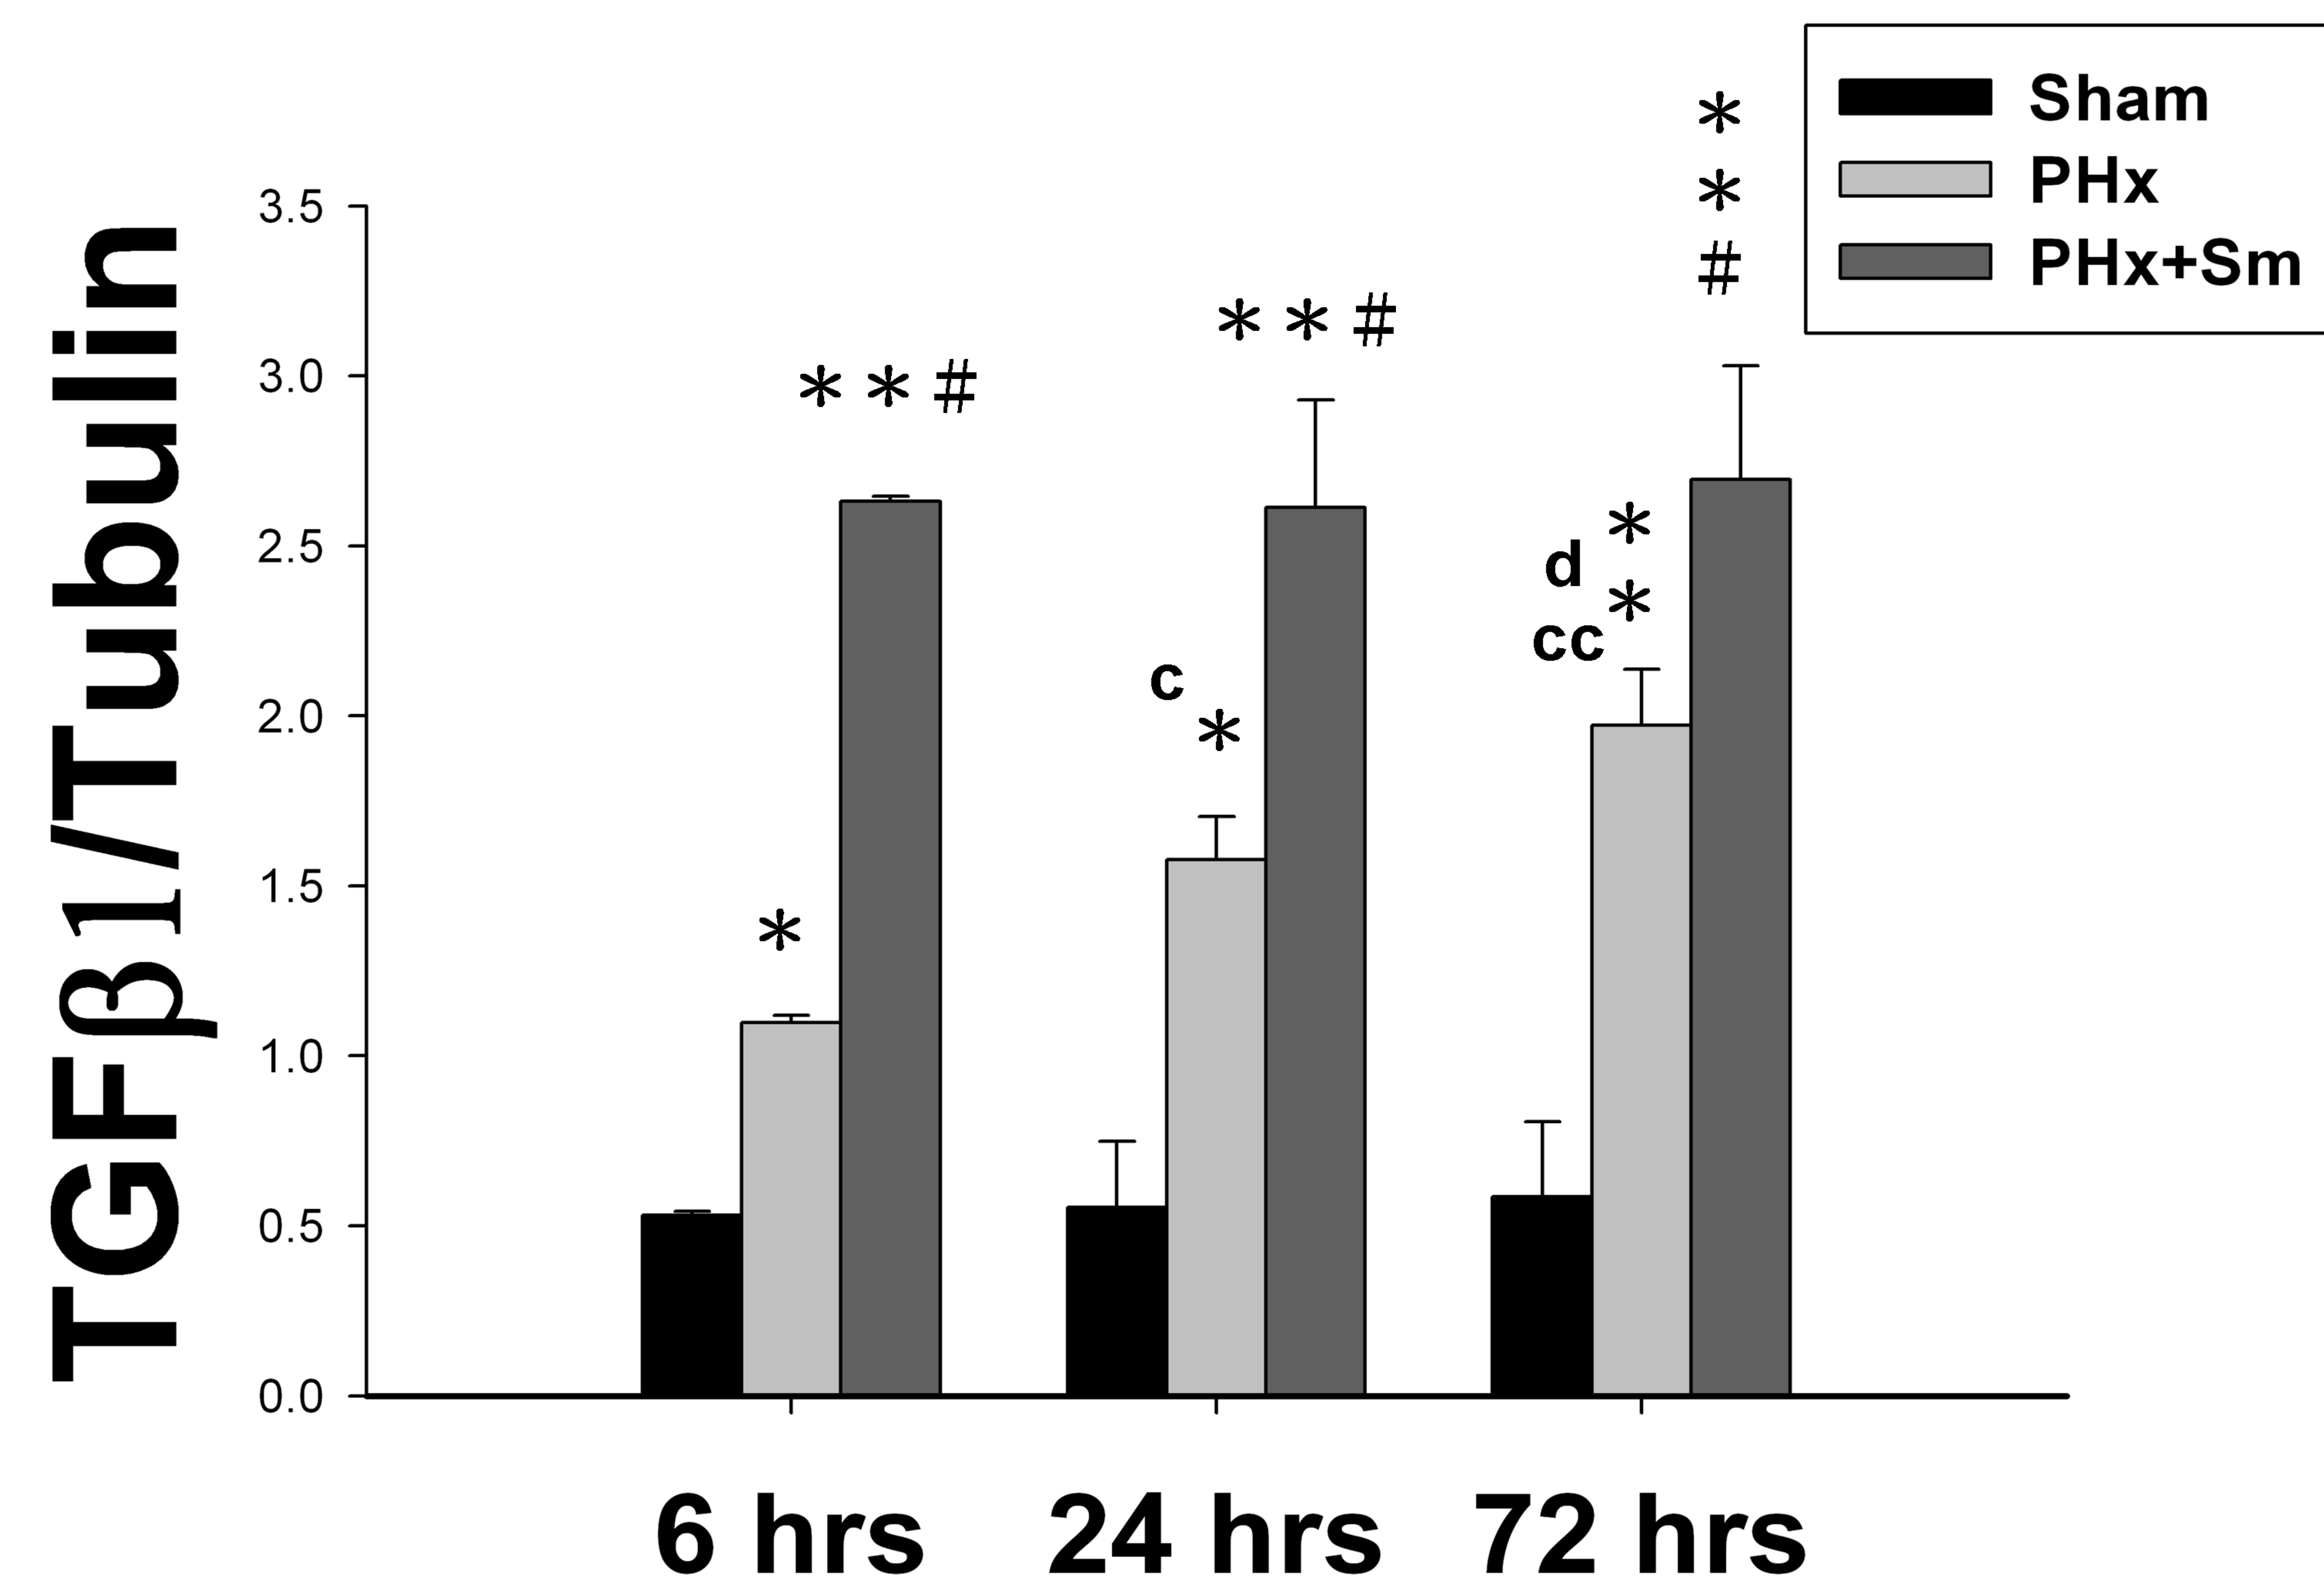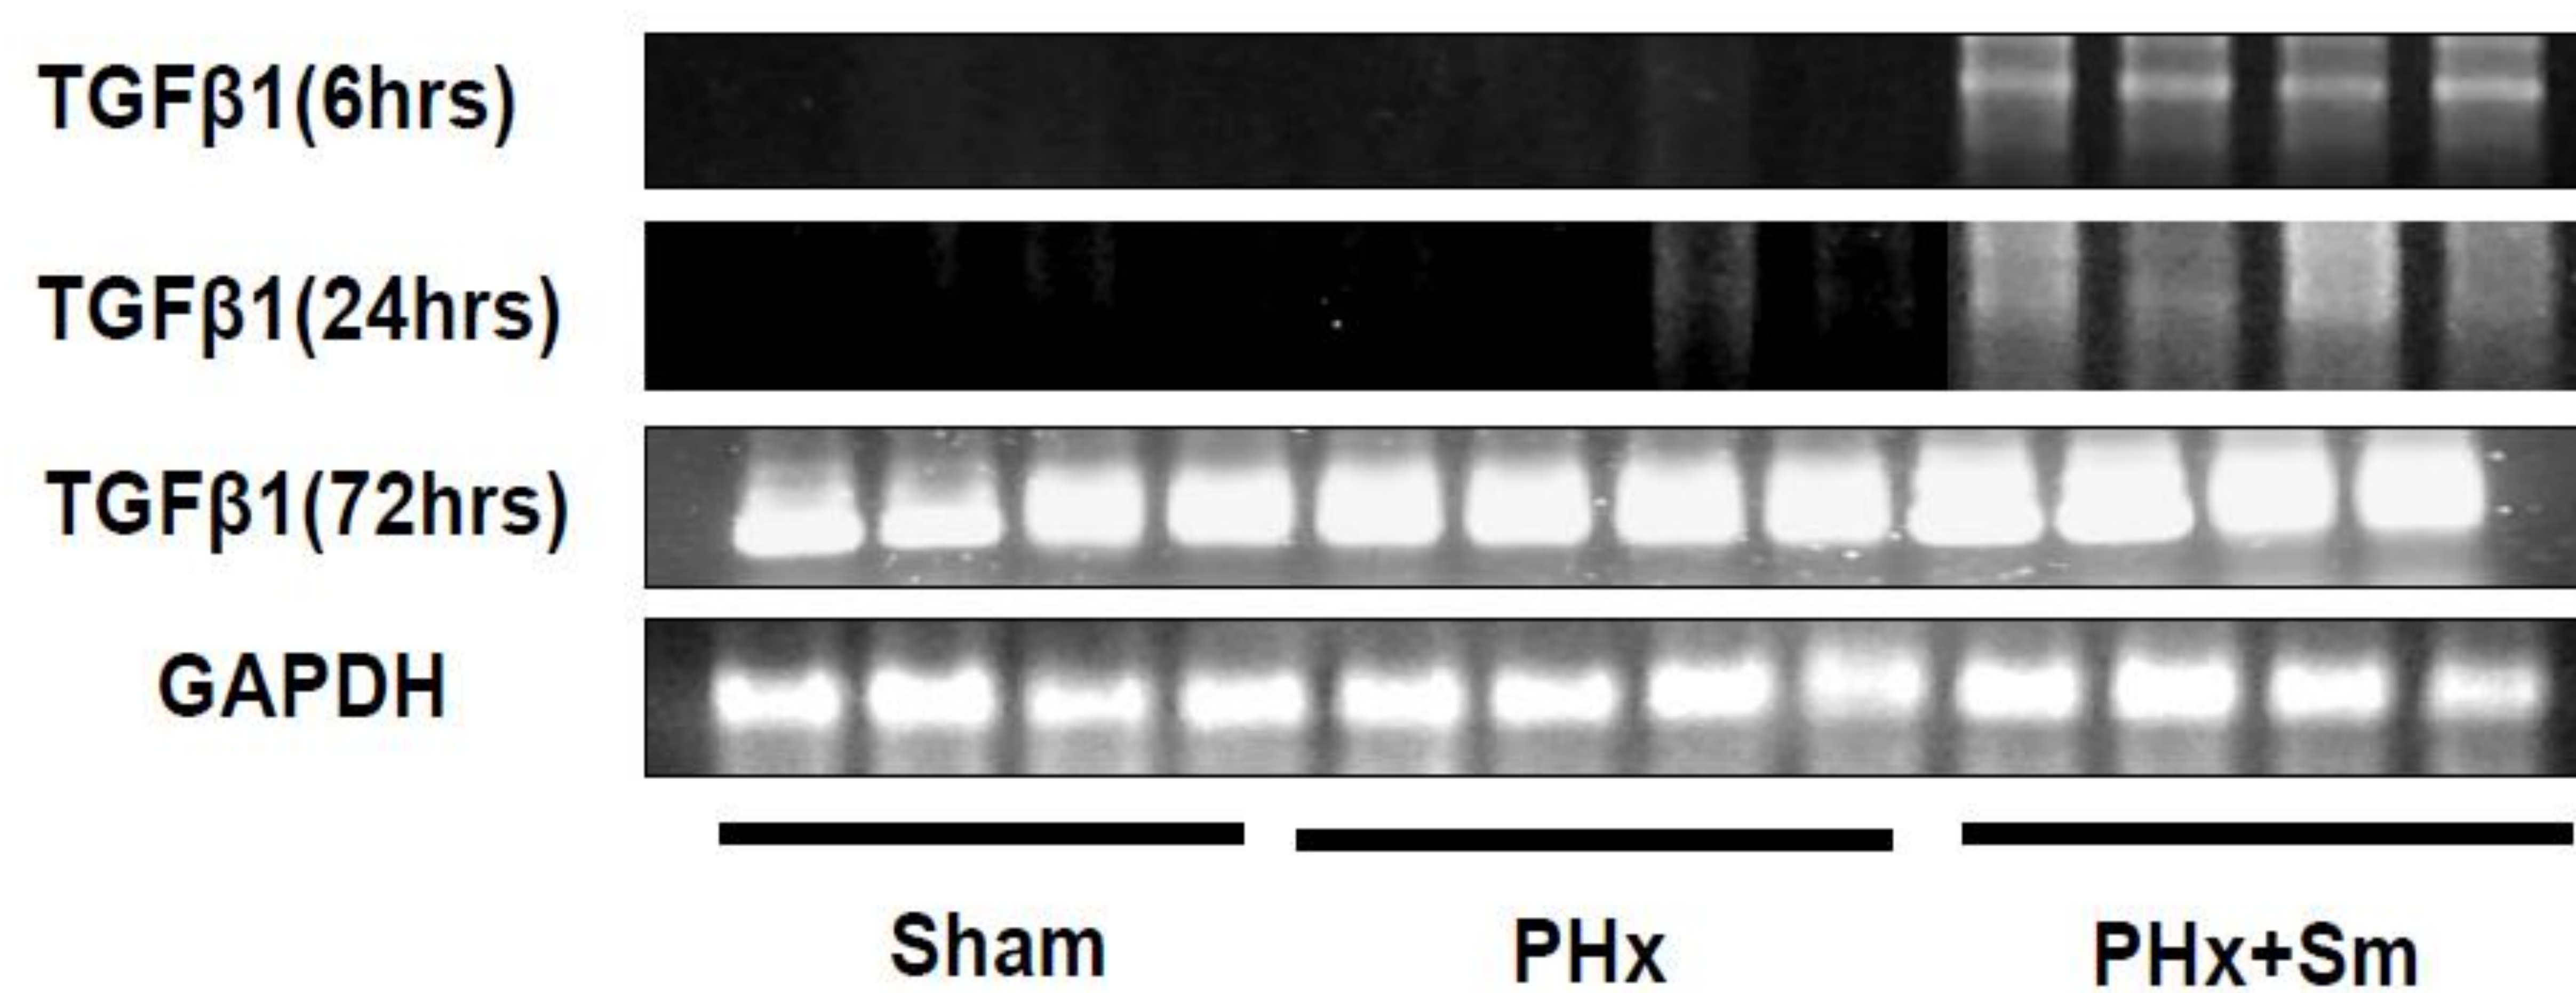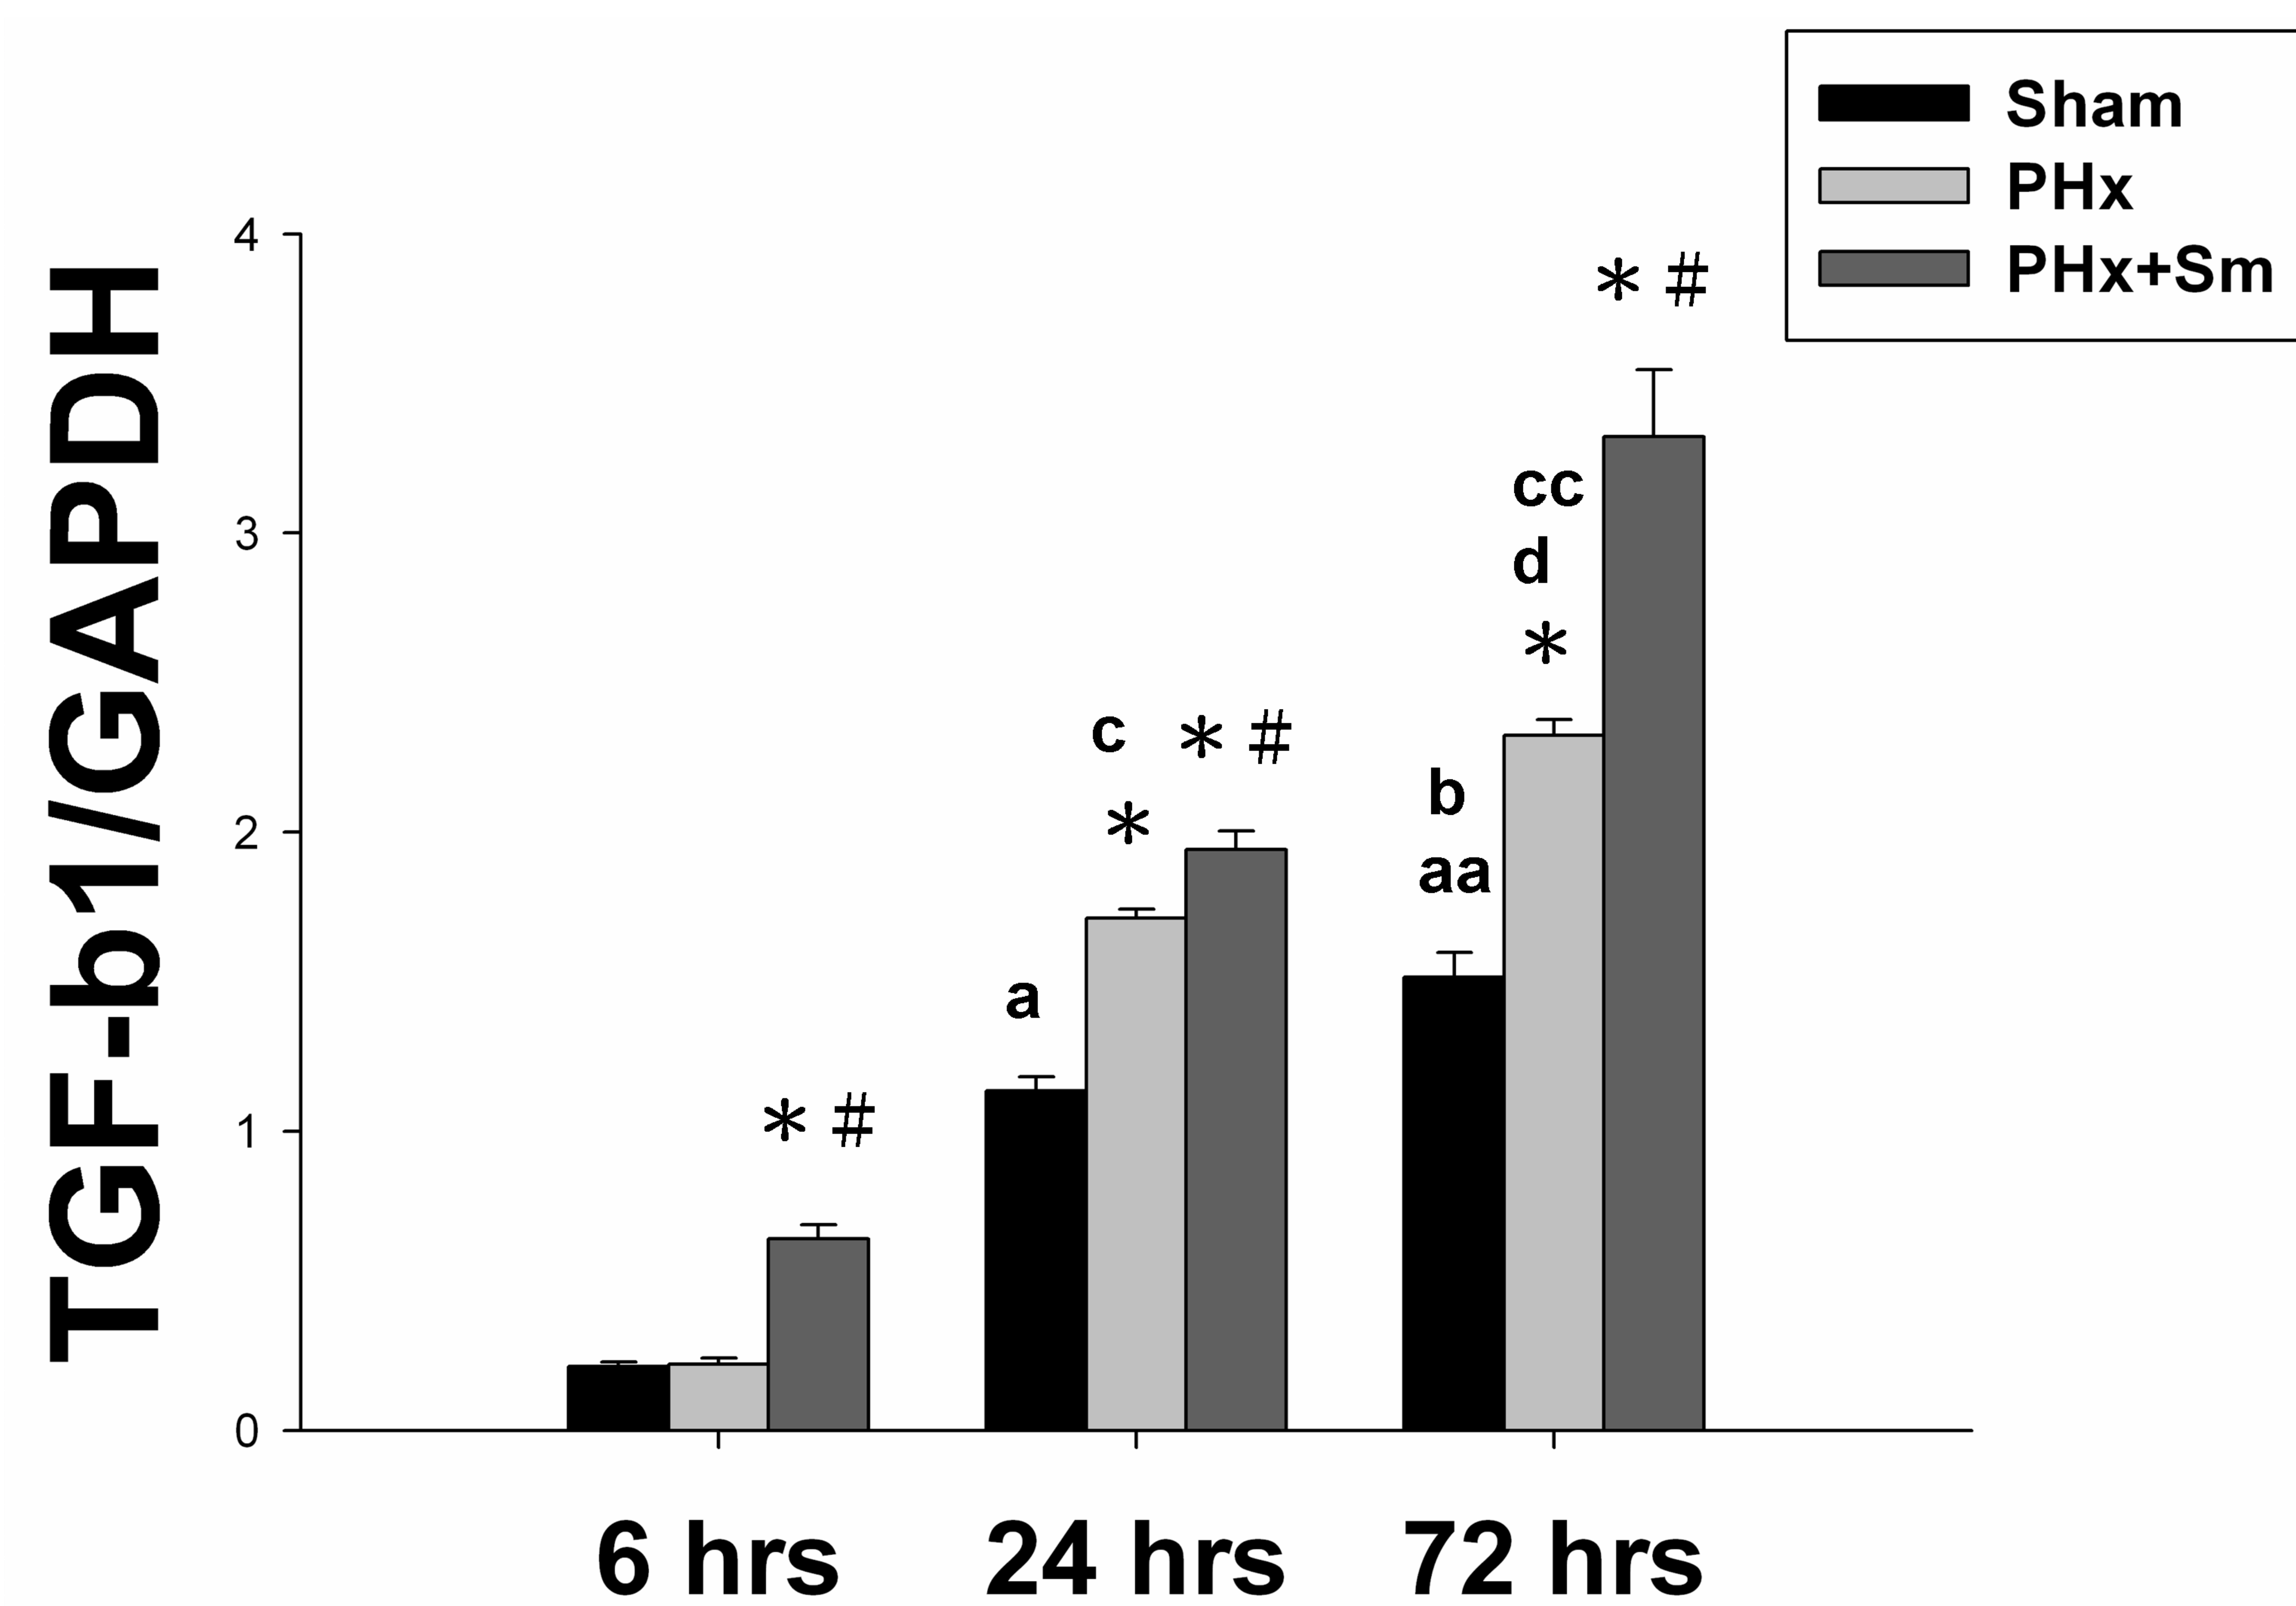

Supplement: f1 [file 2575273.f1.zip › Figure 6.pdf]
